# Supplementary material for: Enantioselective palladium-catalyzed C(sp2)–C(sp2) σ bond activation of cyclopropenones by merging desymmetrization and (3 + 2) spiroannulation with cyclic 1,3-diketones
Source: Royal Society of Chemistry journal article supplement (doi:10.1039/d1sc04558j), 2021-01-01
Supplement: d1sc04558j1.pdf [file d1sc04558j1.pdf]

## Supporting Information

### **Enantioselective Palladium-Catalyzed (3+2) Spiroannulation of Cyclopropenones with Cyclic 1,3-Diketones: Merging C(sp<sup>2</sup>)-C(sp<sup>2</sup>) $\sigma$ Bond Activation and Desymmetrization**

*Han-Qi Zhou<sup>+</sup>, Xing-Wei Gu<sup>+</sup>, Xiao-Hua Zhou, Li Li, Fei Ye, Zheng Xu, and Li-Wen Xu\**

## Content

|                                                                                                                      |     |
|----------------------------------------------------------------------------------------------------------------------|-----|
| <b>1. General Information</b> .....                                                                                  | S1  |
| <b>2. General procedure for the synthesis of 1,3-diones.</b> .....                                                   | S1  |
| <b>3. General procedure for the synthesis of products 3.</b> .....                                                   | S4  |
| <b>Table S1. The effect of P-ligands L1-L10 in the reaction.</b> .....                                               | S26 |
| <b>Table S2. The screen of temp in the reaction.</b> .....                                                           | S28 |
| <b>Table S3. The effect of P-ligands L11-L16 in the reaction.</b> .....                                              | S28 |
| <b>Table S4. The screen of palladium metal salts in the reaction.</b> .....                                          | S29 |
| <b>Table S5. The screen of the reaction concentration.</b> .....                                                     | S30 |
| <b>Table S6. The effect of P-ligands L17-L20 in the reaction.</b> .....                                              | S30 |
| <b>Table S7. The screen of solvents in the reaction.</b> .....                                                       | S31 |
| <b>Scheme S1. Substrate scope</b> .....                                                                              | S32 |
| <b>4. Transformation of Products.</b> .....                                                                          | S34 |
| <b>5. Supplementary Figures</b> .....                                                                                | S37 |
| <b>Figure S1. Comparison of <sup>31</sup>P NMR of ligand and Pd/L7 complex in the reaction with 1a and 2a.</b> ..... | S37 |
| <b>Figure S2. Proposed catalytic cycles for the model reaction system.</b> .....                                     | S38 |
| <b>Figure S3. Control Experiments</b> .....                                                                          | S39 |
| <b>Figure S4. NOESY spectrum of 4. The determination of the structure of product 4.</b> .....                        | S40 |
| <b>Figure S5. NOESY spectrum of 5. The determination of the structure of product 5.</b> .....                        | S40 |
| <b>6. The confirmation of the absolute configuration of chiral product.</b> .....                                    | S41 |
| <b>7. References</b> .....                                                                                           | S42 |
| <b>8. <sup>1</sup>H NMR, <sup>13</sup>C NMR and <sup>19</sup>F NMR Spectra</b> .....                                 | S43 |
| <b>9. HPLC and UPLC Spectra</b> .....                                                                                | S90 |

## 1. General Information

Unless specifically stated, all reagents were commercially obtained and where appropriate, purified prior to use. Dichloromethane (DCM), toluene, were freshly distilled from CaH<sub>2</sub>, Ether (Et<sub>2</sub>O), tetrahydrofuran (THF) and 1, 4-dioxane were dried and distilled from metal sodium and benzophenone. Alcohol solvents were dried and distilled from metal magnesium. Other commercially available reagents and solvents were used directly without purification. Reactions were monitored by thin layer chromatography (TLC) using silica gel plates. Flash column chromatography was performed over silica (200 - 300 mesh). <sup>1</sup>H, <sup>13</sup>C NMR spectra were recorded on a Bruker 400 MHz or 500 MHz spectrometer in CDCl<sub>3</sub>. Multiplicities were given as: s (singlet); d (doublet); dd (doublets of doublet); t (triplet); q (quartet) or m (multiplets). High resolution mass spectra (HRMS) of the products were obtained on a Bruker Daltonics micro TOF-spectrometer. HPLC was carried out with a Agilent 1260 infinity, Waters AcQuity HPLC or Waters AcQuity UPLC using a chiralcel OD column, a chiralcel AD column, a chiralcel MD column, a chiralcel ND column.

## 2. General procedure for the synthesis of 1,3-diones.<sup>1,2,3</sup>

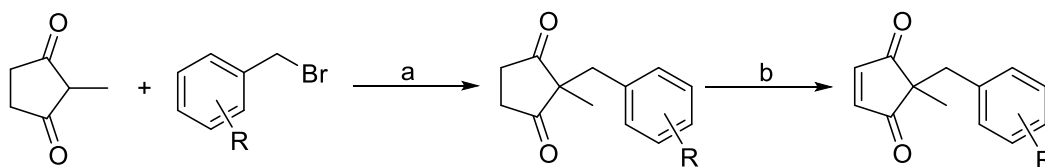

a): To a stirred mixture of 2-Methyl-1,3-cyclopentanedione in H<sub>2</sub>O (1 mol/L) was added portionwise powdered NaHCO<sub>3</sub> (1 equiv.) followed by addition of benzyl bromide (2 equiv.). the reaction suspension was stirred at 80 °C overnight. After cooling down to room temperature, the reaction mixture was extracted with dichloromethane 3 times. The combined solvent was dried over Na<sub>2</sub>SO<sub>4</sub>. After removing the solvent under vacuum, the crude material was applied onto column chromatography to afford the intermediate product.

b): Dissolve the intermediate product in MeOH followed by addition of CuBr<sub>2</sub> (2.2 equiv.). The mixture was refluxed under N<sub>2</sub> for 1 h. It was allowed to cool down and evaporated under vacuum. The residual was subject to column chromatography to give

desired 1,3-dione.

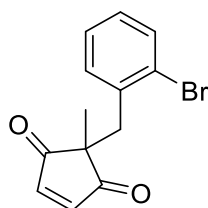

**2-(2-bromobenzyl)-2-methylcyclopent-4-ene-1,3-dione (2i):**

Yellow Solid, mp 74-77°C. <sup>1</sup>H NMR (400 MHz, CDCl<sub>3</sub>) δ 7.52 - 7.43 (m, 1H), 7.21 - 7.12 (m, 3H), 7.05 (m, 2H), 3.19 (s, 2H), 1.27 (s, 3H). <sup>13</sup>C NMR (100 MHz, CDCl<sub>3</sub>) δ 206.4, 148.5, 135.3, 133.5, 131.9, 128.9, 127.4, 125.4, 77.5, 77.16, 76.8, 51.5, 39.9, 18.5. HRMS (ESI) m/z: [M+Na]<sup>+</sup> calculated for C<sub>13</sub>H<sub>11</sub>NaO<sub>2</sub>: 300.9835, found: 300.9821.

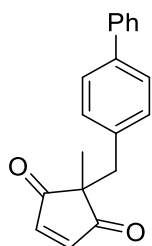

**2-([1,1'-biphenyl]-4-ylmethyl)-2-methylcyclopent-4-ene-1,3-dione (2m):**

Yellow Solid, mp 112-115°C. <sup>1</sup>H NMR (400 MHz, CDCl<sub>3</sub>) δ 7.55 - 7.48 (m, 2H), 7.43 - 7.36 (m, 4H), 7.34 - 7.27 (m, 1H), 7.00 (d, *J* = 8.8 Hz, 4H), 3.03 (s, 2H), 1.27 (s, 3H). <sup>13</sup>C NMR (100 MHz, CDCl<sub>3</sub>) δ 207.4, 148.9, 140.5, 139.8, 134.7, 130.2, 128.9, 127.4, 127.1, 127.0, 77.5, 77.2, 76.8, 52.6, 40.5, 19.5. HRMS (ESI) m/z: [M+Na]<sup>+</sup> calculated for C<sub>19</sub>H<sub>16</sub>NaO<sub>2</sub>: 299.1043, found: 299.1030.

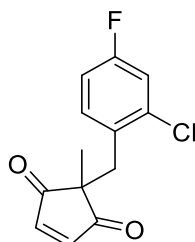

**2-(3-chloro-5-fluorobenzyl)-2-methylcyclopent-4-ene-1,3-dione (2n):**

Yellow Solid, mp 64-67°C. <sup>1</sup>H NMR (400 MHz, CDCl<sub>3</sub>) δ 7.15 (s, 2H), 7.09 - 6.99 (m, 2H), 6.86 (td, *J* = 8.2, 2.8 Hz, 1H), 3.12 (s, 2H), 1.25 (s, 3H). <sup>13</sup>C NMR (100 MHz,

CDCl<sub>3</sub>)  $\delta$  206.4, 161.6 (d,  $J = 248.5$  Hz), 148.5, 135.3 (d,  $J = 10.1$  Hz), 133.0 (d,  $J = 8.6$  Hz), 130.0 (d,  $J = 3.6$  Hz), 117.3 (d,  $J = 24.5$  Hz), 114.1 (d,  $J = 21.0$  Hz). 51.4, 36.7, 18.6. <sup>19</sup>F NMR (500 MHz, CDCl<sub>3</sub>)  $\delta$  -112.7, -112.8, -112.8, -112.8.

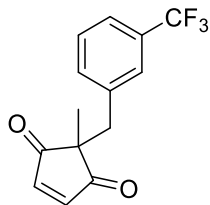

**2-methyl-2-(3-(trifluoromethyl)benzyl)cyclopent-4-ene-1,3-dione (2t):**

Yellow Solid, mp 34-37°C. <sup>1</sup>H NMR (400 MHz, CDCl<sub>3</sub>)  $\delta$  7.42 (d,  $J = 7.6$  Hz, 1H), 7.35 - 7.27 (m, 1H), 7.21 (d,  $J = 2.0$  Hz, 1H), 7.15 (d,  $J = 7.6$  Hz, 1H), 7.04 (s, 2H), 3.05 (s, 2H), 1.28 (s, 3H). <sup>13</sup>C NMR (100 MHz, CDCl<sub>3</sub>)  $\delta$  206.8, 148.9, 135.0 (d,  $J = 329.9$  Hz), 130.8 (q,  $J = 32.0$  Hz), 128.9, 126.5 (q,  $J = 3.7$  Hz), 124.1 (q,  $J = 3.8$  Hz), 124.0 (q,  $J = 270.6$  Hz), 124.0 (q,  $J = 811.9$  Hz), 52.3, 40.1, 19.7. <sup>19</sup>F NMR (500 MHz, CDCl<sub>3</sub>)  $\delta$  -62.8.

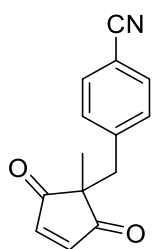

**4-((1-methyl-2,5-dioxocyclopent-3-en-1-yl)methyl)benzonitrile (2v):**

Yellow Solid, mp 116-119°C. <sup>1</sup>H NMR (400 MHz, CDCl<sub>3</sub>)  $\delta$  7.5 (d,  $J = 8.0$  Hz, 2H), 7.08 (d,  $J = 12.0$  Hz, 4H), 3.05 (s, 2H), 1.28 (s, 3H). <sup>13</sup>C NMR (100 MHz, CDCl<sub>3</sub>)  $\delta$  206.5, 148.8, 141.1, 132.2, 130.7, 118.6, 111.2, 77.5, 77.2, 76.8, 52.2, 40.1, 19.8.

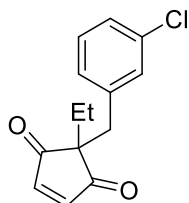

**2-(3-chlorobenzyl)-2-ethylcyclopent-4-ene-1,3-dione (2x):**

Yellow Solid, mp 102-105°C. <sup>1</sup>H NMR (400 MHz, CDCl<sub>3</sub>)  $\delta$  7.07 - 6.94 (m, 4H), 6.84 (s, 1H), 6.78 - 6.67 (m, 1H), 2.86 (s, 2H), 1.75 (q,  $J = 7.6$  Hz, 2H), 0.66 (t,  $J = 7.6$  Hz,

3H).  $^{13}\text{C}$  NMR (100 MHz,  $\text{CDCl}_3$ )  $\delta$  207.3, 150.3, 137.5, 134.2, 129.9, 129.7, 128.2, 127.4, 57.4, 39.6, 27.9, 9.1.

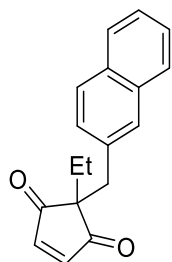

### 2-ethyl-2-(naphthalen-2-ylmethyl)cyclopent-4-ene-1,3-dione (2y):

Yellow Solid, mp 85-88°C.  $^1\text{H}$  NMR (400 MHz,  $\text{CDCl}_3$ )  $\delta$  7.68 - 7.56 (m, 2H), 7.51 (d,  $J$  = 8.4 Hz, 1H), 7.35 - 7.22 (m, 3H), 6.92 (dd,  $J$  = 8.4, 1.8 Hz, 1H), 6.82 (s, 2H), 3.02 (s, 2H), 1.79 (q,  $J$  = 7.5 Hz, 2H), 0.65 (t,  $J$  = 7.5 Hz, 3H).  $^{13}\text{C}$  NMR (100 MHz,  $\text{CDCl}_3$ )  $\delta$  207.7, 150.4, 133.2, 133.1, 132.4, 128.7, 128.1, 127.9, 127.6, 126.2, 125.9, 57.8, 40.5, 27.8, 9.1.

### 3. General procedure for the synthesis of products 3.

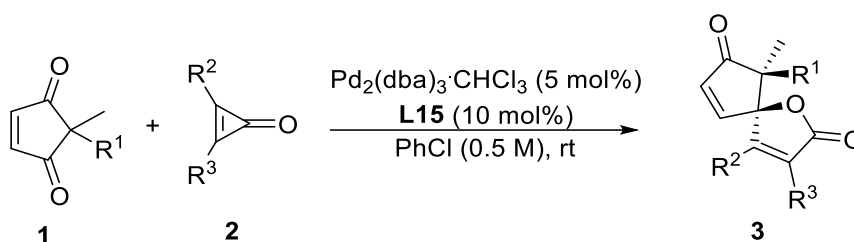

A vial was charged with 1,3-diones **1** (0.2 mmol), cyclopropenone **2** (0.4 mmol),  $\text{Pd}_2(\text{dba})_3 \cdot \text{CHCl}_3$  (5 mol%), (*R,R*)-**L15** (10 mol%) and evacuated under high vacuum and backfilled with  $\text{N}_2$ . MCB (0.4 mL) was next added. The mixture was stirred at 25 °C for 18 hours. Upon reaction completion, the crude was purified by column chromatography to give the corresponding product and was analyzed with  $^1\text{H}$  NMR to determine the diastereomeric ratio and recovered.

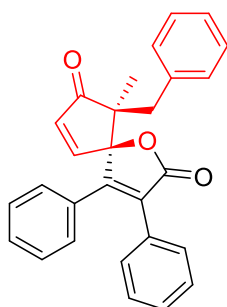

**(5*R*,6*S*)-6-benzyl-6-methyl-3,4-diphenyl-1-oxaspiro[4.4]nona-3,8-diene-2,7-dione (3a):**

Yellow solid (70.8 mg, 87% yield), mp 159-162°C, purified by column chromatography (SiO<sub>2</sub>, PE/EA= 4:1).  $[\alpha]_D^{25} = -119.2$  (c = 1.23, CHCl<sub>3</sub>). <sup>1</sup>H NMR (400 MHz, CDCl<sub>3</sub>)  $\delta$  7.43 (d, *J* = 6.0 Hz, 1H), 7.28 - 7.23 (m, 6H), 7.23 - 7.18 (m, 5H), 7.16 - 7.10 (m, 2H), 6.99 - 6.90 (m, 2H), 6.49 (d, *J* = 6.0 Hz, 1H), 3.07 (s, 2H), 0.94 (s, 3H). <sup>13</sup>C NMR (100 MHz, CDCl<sub>3</sub>)  $\delta$  206.0, 170.6, 159.8, 155.9, 136.2, 131.8, 131.1, 130.1, 129.8, 129.6, 129.2, 129.0, 128.9, 128.4, 128.0, 126.9, 95.2, 58.1, 43.9, 17.9. HRMS (ESI) *m/z*: [M+Na]<sup>+</sup> calculated for C<sub>28</sub>H<sub>22</sub>NaO<sub>3</sub>: 429.1461, found: 429.1455. The enantiomeric excess was determined by UPLC with Chiralpark ND column (hexanes:2-propanol = 75:25, 1 mL/min, 211 nm, 92% *ee*, *d.r.* > 19:1); major enantiomer *tr* = 4.311 min, minor enantiomer *tr* = 7.746 min.

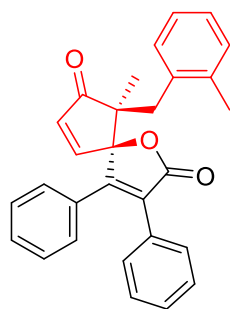

**(5*R*,6*S*)-6-methyl-6-(2-methylbenzyl)-3,4-diphenyl-1-oxaspiro[4.4]nona-3,8-diene-2,7-dione (3b):**

Yellow solid (68.2 mg, 81% yield), mp 140-143°C, purified by column chromatography (SiO<sub>2</sub>, PE/EA= 4:1).  $[\alpha]_D^{25} = -150.8$  (c = 1.47, CHCl<sub>3</sub>). <sup>1</sup>H NMR (400 MHz, CDCl<sub>3</sub>)  $\delta$  7.42 (d, *J* = 6.0 Hz, 1H), 7.18 (d, *J* = 14.4 Hz, 6H), 7.13 (d, *J* = 15.2 Hz, 2H), 7.06 - 6.90 (m, 6H), 6.56 (d, *J* = 5.6 Hz, 1H), 3.13 - 2.93 (m, 2H), 2.12 (s, 3H), 0.85 (s, 3H). <sup>13</sup>C NMR (100 MHz, CDCl<sub>3</sub>)  $\delta$  204.9, 170.6, 159.9, 155.3, 137.5, 136.7, 134.5, 131.9, 131.6, 130.7, 130.1, 129.9, 129.6, 129.4, 129.2, 129.1, 128.9, 128.5, 127.1, 125.3, 95.6, 58.5, 41.0, 20.4, 16.0. HRMS (ESI) *m/z*: [M+Na]<sup>+</sup> calculated for C<sub>29</sub>H<sub>22</sub>NaO<sub>3</sub>: 443.1618, found: 443.1632. The enantiomeric excess was determined by UPLC with Chiralpark ND column (hexanes:2-propanol = 90:10, 1 mL/min, 230 nm, 91% *ee*, *d.r.* = 10:1); major enantiomer *tr* = 6.690 min, minor enantiomer *tr* = 9.385 min.

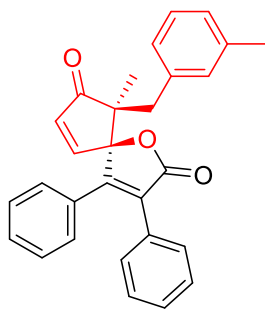

**(5R,6S)-6-methyl-6-(3-methylbenzyl)-3,4-diphenyl-1-oxaspiro[4.4]nona-3,8-diene-2,7-dione (3c):**

Yellow oil (74.9 mg, 89% yield), purified by column chromatography (SiO<sub>2</sub>, PE/EA= 4:1).  $[\alpha]_D^{25} = -87.0$  (c = 2.19, CHCl<sub>3</sub>). <sup>1</sup>H NMR (400 MHz, CDCl<sub>3</sub>)  $\delta$  7.36 (d, *J* = 6.0 Hz, 1H), 7.23 - 7.09 (m, 8H), 7.06 (m, 1H), 6.94 (d, *J* = 7.6 Hz, 1H), 6.91 - 6.81 (m, 4H), 6.43 (d, *J* = 6.0 Hz, 1H), 2.97 (m, 2H), 2.23 (s, 3H), 0.85 (s, 3H). <sup>13</sup>C NMR (100 MHz, CDCl<sub>3</sub>)  $\delta$  206.1, 170.6, 159.8, 155.8, 137.5, 136.1, 131.9, 131.9, 130.1, 129.8, 129.6, 129.2, 129.1, 129.0, 128.9, 128.4, 128.1, 127.9, 127.6, 95.2, 58.0, 43.7, 21.5, 18.0. HRMS (ESI) *m/z*: [M+Na]<sup>+</sup> calculated for C<sub>29</sub>H<sub>22</sub>NaO<sub>3</sub>: 443.1618, found: 443.1636. The enantiomeric excess was determined by UPLC with Chiralpark ND column (hexanes:2-propanol = 90:10, 1 mL/min, 230 nm, 93% *ee d.r.* > 19:1); major enantiomer *tr* = 10.037 min, minor enantiomer *tr* = 5.301 min.

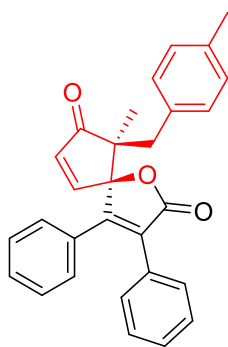

**(5R,6S)-6-methyl-6-(4-methylbenzyl)-3,4-diphenyl-1-oxaspiro[4.4]nona-3,8-diene-2,7-dione (3d):**

Yellow solid (72.2 mg, 86% yield), mp 128-131°C, purified by column chromatography (SiO<sub>2</sub>, PE/EA= 4:1).  $[\alpha]_D^{25} = -337.4$  (c = 0.78, CHCl<sub>3</sub>). <sup>1</sup>H NMR (400 MHz, CDCl<sub>3</sub>)  $\delta$  7.42 (d, *J* = 6.0 Hz, 1H), 7.31 - 7.17 (m, 8H), 7.06 (d, *J* = 7.6 Hz, 1H), 7.04 - 6.93 (m, 5H), 6.50 (d, *J* = 6.0 Hz, 1H), 3.03 (s, 2H), 2.30 (s, 3H), 0.93 (s, 3H). <sup>13</sup>C NMR (100



MHz, CDCl<sub>3</sub>)  $\delta$  206.0, 170.6, 159.8, 155.8, 136.4, 136.3, 133.1, 131.8, 131.0, 130.1, 129.8, 129.6, 129.2, 129.0, 128.9, 128.8, 128.4, 95.3, 58.2, 43.8, 21.2, 17.7. HRMS (ESI)  $m/z$ : [M+Na]<sup>+</sup> calculated for C<sub>29</sub>H<sub>22</sub>NaO<sub>3</sub>: 443.1618, found: 443.1635. The enantiomeric excess was determined by UPLC with Chiralpark ND column (hexanes:2-propanol = 90:10, 1 mL/min, 230 nm, 93% *ee*, *d.r.* > 19:1); major enantiomer *tr* = 11.308 min, minor enantiomer *tr* = 5.500 min.

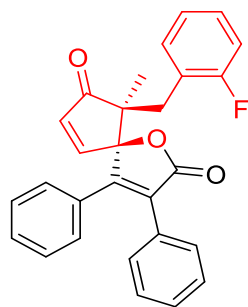

**(5R,6S)-6-(2-fluorobenzyl)-6-methyl-3,4-diphenyl-1-oxaspiro[4.4]nona-3,8-diene-2,7-dione (3e):**

Yellow solid (84.5 mg, 99% yield), mp 174-177°C, purified by column chromatography (SiO<sub>2</sub>, PE/EA = 4:1).  $[\alpha]_D^{25} = -150.2$  (*c* = 1.65, CHCl<sub>3</sub>). <sup>1</sup>H NMR (400 MHz, CDCl<sub>3</sub>)  $\delta$  7.41 (d, *J* = 5.6 Hz, 1H), 7.23 - 7.15 (m, 6H), 7.15 - 7.09 (m, 3H), 7.04 - 6.92 (m, 4H), 6.92 - 6.85 (m, 1H), 6.58 (d, *J* = 6.0 Hz, 1H), 3.06 (d, *J* = 14.0 Hz, 1H), 2.97 (d, *J* = 13.6 Hz, 1H), 0.83 (s, 3H). <sup>13</sup>C NMR (100 MHz, CHCl<sub>3</sub>)  $\delta$  204.3, 170.6, 161.5 (d, *J* = 244.0 Hz), 159.7, 154.9, 136.7, 133.1 (d, *J* = 4.0 Hz), 131.5, 130.0, 129.8, 129.6, 129.5, 129.3, 129.2, 129.1, 129.1, 129.1, 129.0, 128.9, 128.5, 128.4, 123.6 (d, *J* = 3.0 Hz), 123.2 (d, *J* = 16.0 Hz), 115.3 (d, *J* = 22.0 Hz), 95.4, 57.9, 37.9, 15.5. <sup>19</sup>F NMR (500 MHz, CDCl<sub>3</sub>)  $\delta$  -112.8 - -114.0 (m). HRMS (ESI)  $m/z$ : [M+Na]<sup>+</sup> calculated for C<sub>28</sub>H<sub>21</sub>FNaO<sub>3</sub>: 447.1367, found: 447.1378. The enantiomeric excess was determined by UPLC with Chiralpark MD column (hexanes:2-propanol = 85:15, 1 mL/min, 211 nm, 92% *ee*, *d.r.* = 9:1); major enantiomer *tr* = 6.542 min, major enantiomer *tr* = 4.901 min, minor enantiomer *tr* = 8.976 min.

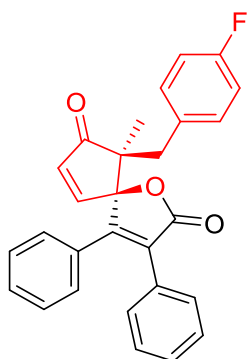

**(5R,6S)-6-(4-fluorobenzyl)-6-methyl-3,4-diphenyl-1-oxaspiro[4.4]nona-3,8-diene-2,7-dione (3f):**

Yellow oil (80.5 mg, 95% yield), purified by column chromatography (SiO<sub>2</sub>, PE/EA= 4:1).  $[\alpha]_D^{25} = -407.8$  (c = 0.79, CHCl<sub>3</sub>). <sup>1</sup>H NMR (400 MHz, CDCl<sub>3</sub>)  $\delta$  7.35 (d, *J* = 5.6 Hz, 1H), 7.21 - 7.16 (m, 4H), 7.16 - 7.11 (m, 4H), 7.05 - 6.99 (m, 2H), 6.93 - 6.82 (m, 4H), 6.40 (d, *J* = 5.6 Hz, 1H), 2.96 (s, 2H), 0.85 (s, 3H). <sup>13</sup>C NMR (100 MHz, CDCl<sub>3</sub>)  $\delta$  205.9, 170.5, 161.9 (d, *J* = 243.7 Hz), 159.7, 156.1, 136.3, 132.6 (d, *J* = 7.9 Hz), 131.9 (d, *J* = 3.1 Hz), 131.7, 130.0, 129.9, 129.6, 129.2, 129.1, 129.1, 129.0, 128.4, 114.9 (d, *J* = 20.7 Hz), 95.2, 58.0, 43.3, 17.7. <sup>19</sup>F NMR (500 MHz, CDCl<sub>3</sub>)  $\delta$  -115.9 - -116.1 (m). HRMS (ESI) *m/z*: [M+Na]<sup>+</sup> calculated for C<sub>28</sub>H<sub>21</sub>FNao<sub>3</sub>: 447.1367, found: 447.1376. The enantiomeric excess was determined by UPLC with Chiralpark ND column (hexanes:2-propanol = 90:10, 1 mL/min, 230 nm, 92% *ee*, *d.r.* > 19:1); major enantiomer *tr* = 5.479 min, minor enantiomer *tr* = 11.969 min.

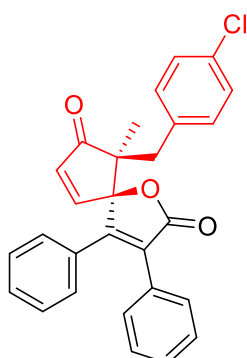

**(5R,6S)-6-(4-chlorobenzyl)-6-methyl-3,4-diphenyl-1-oxaspiro[4.4]nona-3,8-diene-2,7-dione (3g):**

Yellow solid (87.3 mg, 99% yield), mp 141-144°C, purified by column chromatography (SiO<sub>2</sub>, PE/EA= 4:1).  $[\alpha]_D^{25} = -177.9$  (c = 2.26, CHCl<sub>3</sub>). <sup>1</sup>H NMR (400 MHz, CDCl<sub>3</sub>)  $\delta$  7.34 (d, *J* = 8.0 Hz, 1H), 7.21 - 7.10 (m, 10H), 7.00 (m, 2H), 6.94 - 6.87 (m, 2H), 6.40

(d,  $J = 5.6$  Hz, 1H), 2.94 (m, 2H), 0.85 (s, 3H).  $^{13}\text{C}$  NMR (100 MHz,  $\text{CDCl}_3$ )  $\delta$  204.4, 170.5, 159.7, 154.1, 137.3, 135.8, 133.0, 133.0, 131.6, 130.1, 129.8, 129.6, 129.3, 129.2, 129.1, 128.9, 128.7, 128.4, 126.8, 126.6, 95.4, 77.5, 77.3, 77.1, 76.8, 57.9, 43.3, 15.7. HRMS (ESI)  $m/z$ :  $[\text{M}+\text{Na}]^+$  calculated for  $\text{C}_{28}\text{H}_{21}\text{ClNaO}_3$ : 463.1071, found: 463.1083. The enantiomeric excess was determined by UPLC with Chiralpark ND column (hexanes:2-propanol = 90:10, 1 mL/min, 230 nm, 92% *ee*, *d.r.* > 19:1); major enantiomer  $t_r = 5.376$  min, minor enantiomer  $t_r = 12.495$  min.

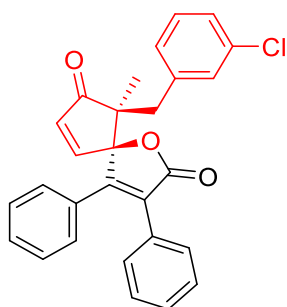

**(5R,6S)-6-(3-chlorobenzyl)-6-methyl-3,4-diphenyl-1-oxaspiro[4.4]nona-3,8-diene-2,7-dione (3h):**

Yellow oil (80 mg, 91% yield), purified by column chromatography ( $\text{SiO}_2$ , PE/EA = 4:1).  $[\alpha]_D^{25} = -92.8$  ( $c = 2.63$ ,  $\text{CHCl}_3$ ).  $^1\text{H}$  NMR (400 MHz,  $\text{CDCl}_3$ )  $\delta$  7.38 (d,  $J = 6.0$  Hz, 1H), 7.21 - 7.10 (m, 10H), 7.06 (d,  $J = 2.0$  Hz, 1H), 6.98 - 6.85 (m, 3H), 6.43 (d,  $J = 6.0$  Hz, 1H), 2.95 (s, 2H), 0.85 (s, 3H).  $^{13}\text{C}$  NMR (100 MHz,  $\text{CDCl}_3$ )  $\delta$  205.7, 170.4, 159.6, 156.1, 138.3, 136.1, 133.8, 131.8, 131.0, 130.1, 129.9, 129.6, 129.3, 129.3, 129.1, 129.1, 129.1, 129.0, 128.4, 127.2, 95.0, 77.5, 77.2, 76.8, 57.7, 43.3, 18.0. HRMS (ESI)  $m/z$ :  $[\text{M}+\text{Na}]^+$  calculated for  $\text{C}_{28}\text{H}_{21}\text{ClNaO}_3$ : 463.1071, found: 463.1063. The enantiomeric excess was determined by UPLC with Chiralpark ND column (hexanes:2-propanol = 90:10, 1 mL/min, 230 nm, 91% *ee*, *d.r.* > 19:1); major enantiomer  $t_r = 6.065$  min, minor enantiomer  $t_r = 10.430$  min.

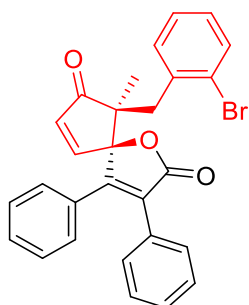

**(5*R*,6*S*)-6-(2-bromobenzyl)-6-methyl-3,4-diphenyl-1-oxaspiro[4.4]nona-3,8-diene-2,7-dione (3i):**

Yellow oil (81.5 mg, 84% yield), purified by column chromatography (SiO<sub>2</sub>, PE/EA= 4:1).  $[\alpha]_D^{25} = -52.8$  (c = 1.68, CHCl<sub>3</sub>). <sup>1</sup>H NMR (400 MHz, CDCl<sub>3</sub>)  $\delta$  7.48 - 7.40 (m, 3H) (major), 7.37 (dd, J = 7.7, 1.7 Hz, 0.4H) (minor), 7.25 - 7.10 (m, 12.5H), 7.07 (dd, J = 7.8, 1.9 Hz, 1.3H), 7.04 - 6.92 (m, 4.2H), 6.65 (d, J = 5.8 Hz, 1H) (major), 6.57 (d, J = 5.8 Hz, 0.2H) (minor), 3.30 - 3.10 (m, 2H) (major), 2.94 - 2.64 (m, 0.5H) (minor), 1.35 (s, 1H) (minor), 0.86 (s, 3H) (major). <sup>13</sup>C NMR (100 MHz, CDCl<sub>3</sub>)  $\delta$  206.9, 204.5, 170.6, 159.8, 159.1, 156.0, 154.2, 137.4, 136.9, 135.9, 135., 133.1, 133.0, 132.0, 131.7, 131.5, 130.9, 130.2, 130.1, 130.0, 129.7, 129.5, 129.4, 129.3, 129.3, 129.2, 129.1, 129.0, 128.8, 128.6, 128.5, 128.4, 127.3, 126.9, 126.7, 126.7, 96.2, 95.5, 77.5, 77.4, 77.2, 76.8, 58.0, 56.8, 43.4, 37.2, 27.0, 22.9, 15.8, 14.2. HRMS (ESI) m/z: [M+Na]<sup>+</sup> calculated for C<sub>28</sub>H<sub>21</sub>BrNaO<sub>3</sub>: 507.0566, found: 507.0583. The enantiomeric excess was determined by UPLC with Chiralpark ND column (hexanes:2-propanol = 85:15, 0.6 mL/min, 211 nm, 90% *ee* (major), >99% (minor), *d.r.* = 4:1); major enantiomer *tr* = 15.182 min, major enantiomer *tr* = 2.655 min, major enantiomer *tr* = 8.402 min.

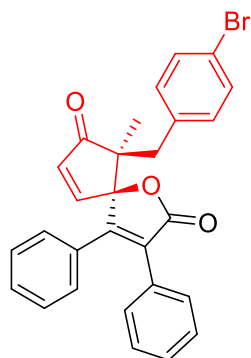

**(5*R*,6*S*)-6-(4-bromobenzyl)-6-methyl-3,4-diphenyl-1-oxaspiro[4.4]nona-3,8-diene-2,7-dione (3j):**

Yellow solid (93.1mg, 96% yield), mp 135-138 °C, purified by column chromatography (SiO<sub>2</sub>, PE/EA= 4:1).  $[\alpha]_D^{25} = -78.1$  (c = 2.56, CHCl<sub>3</sub>). <sup>1</sup>H NMR (400 MHz, CDCl<sub>3</sub>)  $\delta$  7.43 (d, J = 5.6 Hz, 1H), 7.40 - 7.34 (m, 2H), 7.31- 7.26 (m, 3H), 7.24 -7.18 (m, 5H), 7.06 - 6.93 (m, 4H), 6.48 (d, J = 5.6 Hz, 1H), 3.01 (m, 2H), 0.93 (s, 3H). <sup>13</sup>C NMR (100 MHz, CDCl<sub>3</sub>)  $\delta$  205.8, 170.5, 159.6, 156.2, 136.3, 135.3, 132.8, 131.7, 131.1, 130.1, 129.9, 129.5, 129.2, 129.1, 129.1, 129.0, 128.5, 121.0, 95.1, 77.5, 77.4, 77.2, 76.8, 57.9, 43.5,

17.8. HRMS (ESI)  $m/z$ :  $[M+Na]^+$  calculated for  $C_{28}H_{21}BrNaO_3$ : 507.0566, found: 507.0574. The enantiomeric excess was determined by HPLC with Chiralpark OD column (hexanes:2-propanol = 80:20, 0.5 mL/min, 210 nm, 90% *ee*, *d.r.* = 17:1); major enantiomer *tr* = 46.783 min, minor enantiomer *tr* = 52.708 min.

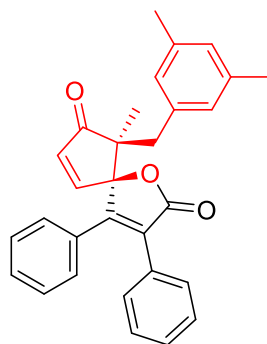

**(5*R*,6*S*)-6-(3,5-dimethylbenzyl)-6-methyl-3,4-diphenyl-1-oxaspiro[4.4]nona-3,8-diene-2,7-dione (3k):**

Yellow oil (80.8 mg, 93% yield), purified by column chromatography ( $SiO_2$ , PE/EA = 4:1).  $[\alpha]_D^{25} = -117.0$  ( $c = 2.25$ ,  $CHCl_3$ ).  $^1H$  NMR (400 MHz,  $CDCl_3$ )  $\delta$  7.36 (d,  $J = 6.0$  Hz, 1H), 7.21 - 7.15 (m, 4H), 7.14 - 7.09 (m, 4H), 6.92 - 6.84 (m, 2H), 6.76 (s, 1H), 6.66 (d,  $J = 1.6$  Hz, 2H), 6.44 (d,  $J = 5.6$  Hz, 1H), 3.00 - 2.82 (m, 2H), 2.19 (s, 6H), 0.84 (s, 3H).  $^{13}C$  NMR (100 MHz,  $CDCl_3$ )  $\delta$  206.1, 170.6, 159.8, 155.7, 137.3, 136.1, 136.0, 131.9, 130.0, 129.8, 129.6, 129.2, 129.1, 129.0, 128.9, 128.5, 128.4, 95.3, 77.5, 77.2, 76.8, 57.9, 43.4, 21.3, 17.9. HRMS (ESI)  $m/z$ :  $[M+Na]^+$  calculated for  $C_{30}H_{26}NaO_3$ : 457.1774, found: 457.1794. The enantiomeric excess was determined by UPLC with Chiralpark ND column (hexanes:2-propanol = 90:10, 1 mL/min, 230 nm, 92% *ee*, *d.r.* > 19:1); major enantiomer *tr* = 4.278 min, minor enantiomer *tr* = 8.875 min.

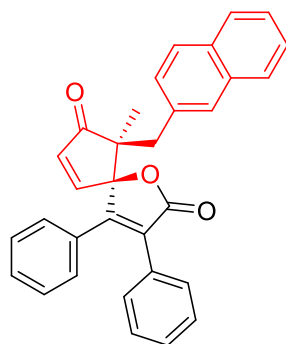

**(5*R*,6*S*)-6-methyl-6-(naphthalen-2-ylmethyl)-3,4-diphenyl-1-oxaspiro[4.4]nona-3,8-diene-2,7-dione (3l):**

Yellow solid (89.4 mg, 98% yield), mp 146-149°C, purified by column chromatography (SiO<sub>2</sub>, PE/EA= 4:1).  $[\alpha]_D^{25} = -162.9$  (c = 2.98, CHCl<sub>3</sub>). <sup>1</sup>H NMR (400 MHz, CDCl<sub>3</sub>)  $\delta$  7.75 - 7.67 (m, 2H), 7.63 (d, *J* = 8.4 Hz, 1H), 7.58 (d, *J* = 2.0 Hz, 1H), 7.39 - 7.33 (m, 2H), 7.30 (d, *J* = 6.0 Hz, 1H), 7.19 - 7.14 (m, 3H), 7.13 - 7.06 (m, 4H), 7.04 - 6.98 (m, 2H), 6.87 - 6.80 (m, 1H), 6.38 (d, *J* = 6.0 Hz, 1H), 3.15 (s, 2H), 0.91 (s, 3H). <sup>13</sup>C NMR (100 MHz, CDCl<sub>3</sub>)  $\delta$  206.2, 170.6, 159.7, 156.0, 136.2, 133.9, 133.2, 132.4, 131.8, 130.1, 123.0, 129.8, 129.5, 129.2, 129.1, 129.1, 129.0, 128.9, 128.4, 127.9, 127.6, 127.4, 126.0, 125.8, 95.2, 77.5, 77.4, 77.2, 76.8, 58.0, 44.0, 18.4. HRMS (ESI) *m/z*: [M+Na]<sup>+</sup> calculated for C<sub>32</sub>H<sub>24</sub>NaO<sub>3</sub>: 479.1618, found: 479.1633. The enantiomeric excess was determined by UPLC with Chiralpark ND column (hexanes:2-propanol = 90:10, 1 mL/min, 230 nm, 91% *ee*, *d.r.* > 19:1); major enantiomer *tr* = 7.973 min, minor enantiomer *tr* = 15.258 min.

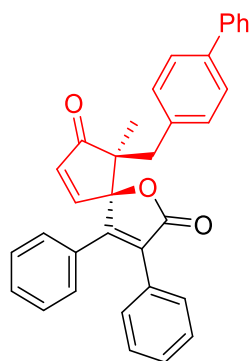

**(5*R*,6*S*)-6-((1,1'-biphenyl)-4-ylmethyl)-6-methyl-3,4-diphenyl-1-oxaspiro[4.4]nona-3,8-diene-2,7-dione (3m):**

Yellow solid (76.9 mg, 80% yield), mp 173-176°C, purified by column chromatography (SiO<sub>2</sub>, PE/EA= 4:1).  $[\alpha]_D^{25} = -309.8$  (c = 1.22, CHCl<sub>3</sub>). <sup>1</sup>H NMR (400 MHz, CDCl<sub>3</sub>)  $\delta$  7.54 - 7.47 (m, 2H), 7.44 - 7.39 (m, 2H), 7.38 - 7.31 (m, 3H), 7.25 (m, 1H), 7.20 - 7.08 (m, 10H), 6.93 - 6.85 (m, 2H), 6.43 (d, *J* = 5.6 Hz, 1H), 3.03 (s, 2H), 0.89 (s, 3H). <sup>13</sup>C NMR (100 MHz, CDCl<sub>3</sub>)  $\delta$  206.1, 170.6, 159.8, 156.0, 140.8, 139.6, 136.2, 135.4, 131.8, 131.5, 130.1, 129.9, 129.6, 129.2, 129.0, 129.0, 128.8, 128.4, 127.3, 127.1, 126.7, 95.2, 77.5, 77.2, 76.8, 58.1, 43.6, 18.1. HRMS (ESI) *m/z*: [M+Na]<sup>+</sup> calculated for C<sub>34</sub>H<sub>26</sub>NaO<sub>3</sub>: 505.1774, found: 505.1794. The enantiomeric excess was determined by HPLC with Chiralpark AD column (hexanes:2-propanol = 80:20, 0.7 mL/min, 210 nm,

93% *ee*, *d.r.* > 19:1); major enantiomer *tr* = 17.021 min, major enantiomer *tr* = 14.79 min, minor enantiomer *tr* = 36.692 min.

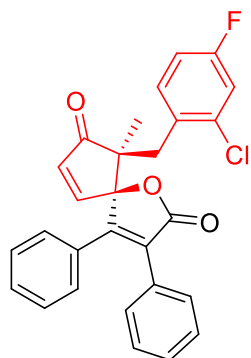

**(5*R*,6*S*)-6-(2-chloro-4-fluorobenzyl)-6-methyl-3,4-diphenyl-1-oxaspiro[4.4]nona-3,8-diene-2,7-dione (3n):**

Yellow oil (81.1 mg, 88% yield), purified by column chromatography (SiO<sub>2</sub>, PE/EA= 4:1).  $[\alpha]_D^{25} = -86.6$  (*c* = 2.21, CHCl<sub>3</sub>). <sup>1</sup>H NMR (400 MHz, CHCl<sub>3</sub>)  $\delta$  7.46 - 7.40 (m, 1H), 7.31 - 7.08 (m, 11H), 7.05 - 6.93 (m, 5H), 6.86 - 6.77 (m, 1H), 6.61 (d, *J* = 6.0 Hz, 1H) (major), 6.54 (d, *J* = 6.0 Hz, 0.3H) (minor), 3.30 - 2.96 (m, 2H) (major), 2.78 - 2.55 (m, 0.6H) (minor), 1.12 (s, 0.8H) (minor), 0.83 (s, 3H) (major). <sup>13</sup>C NMR (100 MHz, CDCl<sub>3</sub>)  $\delta$  206.6, 204.2, 170.5, 170.4, 162.6 (d, *J* = 28.0 Hz), 160.3, 160.0, 159.6, 158.9, 155.9, 154.6, 137.1, 136.1 (d, *J* = 10.0 Hz), 135.8 (d, *J* = 10.0 Hz), 133.9 (d, *J* = 8.0 Hz), 133.0 (d, *J* = 8.0 Hz), 131.5, 131.4, 130.9 (d, *J* = 3.0 Hz), 130.0 (d, *J* = 16.0 Hz), 130.0 (d, *J* = 4.0 Hz), 130.0, 129.4, 129.4, 129.2 (d, *J* = 1.9 Hz), 129.1 (d, *J* = 2.6 Hz), 129.0, 129.0, 128.5, 116.9 (d, *J* = 24.7 Hz), 116.7 (d, *J* = 24.8 Hz), 113.6 (d, *J* = 20.9 Hz), 95.9, 95.4, 57.8, 56.6, 40.6, 33.7, 22.5, 15.4. <sup>19</sup>F NMR (500 MHz, CHCl<sub>3</sub>)  $\delta$  -113.1 - -113.3 (m) (major), -113.4 - -113.73 (m) (minor). HRMS (ESI) *m/z*: [M+Na]<sup>+</sup> calculated for C<sub>28</sub>H<sub>20</sub>ClFNaO<sub>3</sub>: 481.0977, found: 481.0993. The enantiomeric excess was determined by HPLC with Chiralpark AD column (hexanes:2-propanol = 80:20, 0.7 mL/min, 210 nm, 88% *ee* (major), >99% *ee* (minor), *d.r.* = 4:1); major enantiomer *tr* = 13.850 min, major enantiomer *tr* = 10.013 min, minor enantiomer *tr* = 24.598 min.

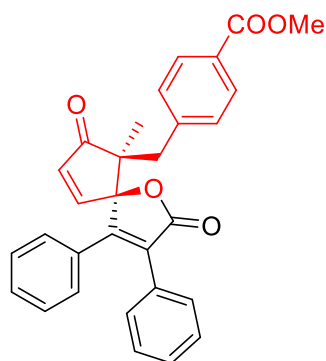

**Methyl 4-(((5R,6S)-6-methyl-2,7-dioxo-3,4-diphenyl-1-oxaspiro [4.4] nona-3,8-dien-6-yl) methyl) benzoate (3o):**

Yellow solid (92.2 mg, 99% yield), mp 138-141°C, purified by column chromatography (SiO<sub>2</sub>, PE/EA= 4:1).  $[\alpha]_D^{25} = -66.7$  (c = 2.74, CHCl<sub>3</sub>). <sup>1</sup>H NMR (400 MHz, CDCl<sub>3</sub>)  $\delta$  7.85 (d, *J* = 8.4 Hz, 2H), 7.36 (d, *J* = 6.0 Hz, 1H), 7.23 - 7.08 (m, 10H), 6.95 - 6.82 (m, 2H), 6.41 (d, *J* = 5.6 Hz, 1H), 3.80 (s, 3H), 3.02 (s, 2H), 0.86 (s, 3H). <sup>13</sup>C NMR (100 MHz, CDCl<sub>3</sub>)  $\delta$  205.6, 170.4, 167.0, 159.5, 156.1, 141.7, 136.2, 131.6, 131.1, 130.0, 129.9, 129.5, 129.2, 129.2, 129.1, 129.1, 129.0, 128.9, 128.7, 128.4, 95.0, 77.5, 77.2, 76.8, 57.9, 52.1, 43.9, 17.8. HRMS (ESI) *m/z*: [M+Na]<sup>+</sup> calculated for C<sub>30</sub>H<sub>24</sub>NaO<sub>5</sub>: 487.1516, found: 487.1532. The enantiomeric excess was determined by HPLC with Chiralpark OD column (hexanes:2-propanol = 80:20, 0.5 mL/min, 254 nm, 92% *ee*, *d.r.* > 19:1); major enantiomer *tr* = 76.447 min, major enantiomer *tr* = 89.884 min, minor enantiomer *tr* = 53.108 min.

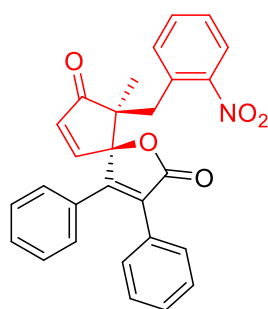

**(5R,6S)-6-methyl-6-(2-nitrobenzyl)-3,4-diphenyl-1-oxaspiro[4.4]nona-3,8-diene-2,7-dione (3p):**

Yellow solid (50.8 mg, 56% yield), mp 140-143°C, purified by column chromatography (SiO<sub>2</sub>, PE/EA= 4:1).  $[\alpha]_D^{25} = 75.2$  (c = 1.55, CHCl<sub>3</sub>). <sup>1</sup>H NMR (400 MHz, CDCl<sub>3</sub>)  $\delta$  7.93 - 7.86 (m, 1H) (major), 7.85 - 7.79 (m, 0.3H) (minor), 7.51 - 7.38 (m, 3H), 7.31 (m,



1.5H), 7.25 - 7.17 (m, 8H), 7.16 - 7.10 (m, 2H), 7.09 - 7.03 (m, 1H), 7.01 - 6.92 (m, 2H), 6.58 (d,  $J = 5.6$  Hz, 1H) (major), 6.55 (d,  $J = 5.6$  Hz, 0.2H) (minor), 4.17 - 3.96 (m, 1H), 3.79 (d,  $J = 14.0$  Hz, 1H), 3.31 (s, 0.3H) (minor), 3.22 (d,  $J = 14.0$  Hz, 1H), 3.00 (d,  $J = 14.0$  Hz, 0.2H) (minor), 2.87 (d,  $J = 14.4$  Hz, 0.2H) (minor), 1.96 (s, 1H), 1.20 - 1.13 (m, 1H), 1.09 (d,  $J = 14.0$  Hz, 1H).  $^{13}\text{C}$  NMR (100 MHz,  $\text{CDCl}_3$ )  $\delta$  206.1, 205.1, 171.3, 170.4, 159.4, 156.2, 154.8, 149.8, 147.9, 136.9, 135.7, 135.0, 134.2, 133.5, 132.9, 132.5, 132.5, 132.2, 131.7, 131.6, 131.4, 131.0, 130.3, 130.1, 129.9, 129.8, 129.6, 129.3, 129.3, 129.2, 129.1, 129.0, 128.8, 128.5, 128.5, 128.5, 128.4, 125.5, 125.4, 125.0, 95.8, 95.3, 77.5, 77.2, 76.8, 60.5, 56.9, 40.4, 36.4, 16.2, 14.3. HRMS (ESI)  $m/z$ :  $[\text{M}+\text{Na}]^+$  calculated for  $\text{C}_{28}\text{H}_{21}\text{NNaO}_5$ : 474.1312, found: 474.1331. The enantiomeric excess was determined by HPLC with Chiralpark OD column (hexanes:2-propanol = 75:25, 1 mL/min, 210 nm, 92% *ee*, *d.r.* = 6:1); major enantiomer *tr* = 21.442 min, major enantiomer *tr* = 10.279 min, minor enantiomer *tr* = 19.485 min.

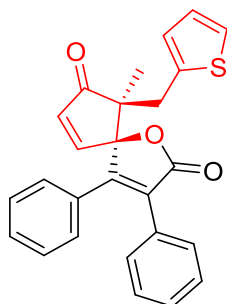

**(5*R*,6*S*)-6-methyl-3,4-diphenyl-6-(thiophen-2-ylmethyl)-1-oxaspiro[4.4]nona-3,8-diene-2,7-dione (3q):**

Yellow oil (43.6 mg, 53% yield), purified by column chromatography ( $\text{SiO}_2$ , PE/EA = 4:1).  $[\alpha]_{\text{D}}^{25} = -10.1$  ( $c = 0.85$ ,  $\text{CHCl}_3$ ).  $^1\text{H}$  NMR (400 MHz,  $\text{CDCl}_3$ )  $\delta$  7.42 (d,  $J = 6.0$  Hz, 1H), 7.25 - 7.11 (m, 6H), 7.10 (m, 1.6 Hz, 3H), 6.96 - 6.89 (m, 2H), 6.87 (m, 3.5 Hz, 1H), 6.82 (m, 1.2 Hz, 1H), 6.45 (d,  $J = 6.0$  Hz, 1H), 3.30 (d,  $J = 14.8$  Hz, 1H), 3.14 (d,  $J = 14.8$  Hz, 1H), 0.87 (s, 3H).  $^{13}\text{C}$  NMR (100 MHz,  $\text{CDCl}_3$ )  $\delta$  206.7, 170.4, 159.4, 156.5, 138.0, 135.7, 132.1, 130.4, 129.9, 129.7, 129.2, 129.0, 129.0, 129.0, 128.9, 128.4, 126.8, 125.1, 94.9, 77.5, 77.2, 76.8, 56.9, 37.5, 19.1, 1.1. HRMS (ESI)  $m/z$ :  $[\text{M}+\text{Na}]^+$  calculated for  $\text{C}_{26}\text{H}_{20}\text{NaO}_3\text{S}$ : 435.1025, found: 435.1039. The enantiomeric excess was determined by HPLC with Chiralpark AD column (hexanes:2-propanol = 80:20, 0.7

mL/min, 210 nm, 92% *ee*, *d.r.* > 19:1); major enantiomer *tr* = 13.817 min, major enantiomer *tr* = 13.048 min, minor enantiomer *tr* = 33.073 min.

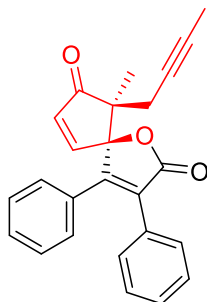

**(5*R*,6*S*)-6-(but-2-yn-1-yl)-6-methyl-3,4-diphenyl-1-oxaspiro[4.4]nona-3,8-diene-2,7-dione (3r):**

Yellow oil (32.5 mg, 44% yield), purified by column chromatography (SiO<sub>2</sub>, PE/EA= 4:1).  $[\alpha]_D^{25} = 233.3$  (*c* = 0.75, CHCl<sub>3</sub>). <sup>1</sup>H NMR (400 MHz, CDCl<sub>3</sub>)  $\delta$  7.52 (d, *J* = 6.0 Hz, 1H), 7.28 - 7.18 (m, 8H), 7.08 - 7.04 (m, 2H), 6.50 (d, *J* = 5.6 Hz, 1H), 2.64 - 2.51 (m, 1H), 2.38 - 2.27 (m, 1H), 1.77 - 1.71 (m, 3H), 0.83 (s, 3H). <sup>13</sup>C NMR (100 MHz, CDCl<sub>3</sub>)  $\delta$  206.9, 170.5, 159.0, 156.4, 135.4, 132.6, 130.3, 130.0, 129.6, 129.4, 129.1, 129.1, 128.8, 128.5, 94.2, 79.2, 77.5, 77.2, 76.8, 74.4, 54.2, 26.8, 19.9, 3.9. HRMS (ESI) *m/z*: [M+Na]<sup>+</sup> calculated for C<sub>25</sub>H<sub>20</sub>NaO<sub>3</sub>: 391.1305, found: 391.1315. The enantiomeric excess was determined by HPLC with Chiralpark AD column (hexanes:2-propanol = 80:20, 1 mL/min, 210 nm, 94% *ee*, *d.r.* > 19:1); major enantiomer *tr* = 8.653 min, major enantiomer *tr* = 6.435 min, minor enantiomer *tr* = 26.965 min.

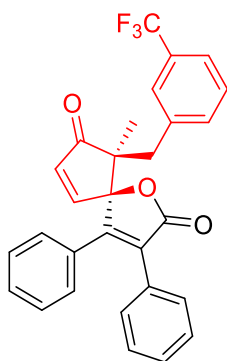

**(5*R*,6*S*)-6-methyl-3,4-diphenyl-6-(3-(trifluoromethyl)benzyl)-1-oxaspiro[4.4]nona-3,8-diene-2,7-dione (3s):**

Yellow Oil (91.8 mg, 97% yield), purified by column chromatography (SiO<sub>2</sub>, PE/EA= 4:1).  $[\alpha]_D^{25} = -108.8$  (*c* = 3.06, CHCl<sub>3</sub>). <sup>1</sup>H NMR (400 MHz, CDCl<sub>3</sub>)  $\delta$  7.44 - 7.36 (m, 2H),

7.33 - 7.24 (m, 3H), 7.23 - 7.09 (m, 8H), 6.93 - 6.86 (m, 2H), 6.45 (d,  $J = 4.6$  Hz, 1H), 3.12 - 2.96 (m, 2H), 0.84 (s, 3H).  $^{13}\text{C}$  NMR (100 MHz,  $\text{CDCl}_3$ )  $\delta$  205.6, 170.7, 159.5, 156.3, 137.2, 136.2, 134.6, 131.7, 130.3 (q,  $J = 31.7$  Hz), 130.1, 129.9, 129.6, 129.2, 129.1, 129.0, 128.5, 128.4, 127.6 (q,  $J = 4.1$  Hz), 124.2 (q,  $J = 270.8$  Hz), 123.8 (q,  $J = 4.1$  Hz), 95.0, 57.7, 43.6, 17.6.  $^{19}\text{F}$  NMR (500 MHz,  $\text{CDCl}_3$ )  $\delta$  -62.5. HRMS (ESI)  $m/z$ :  $[\text{M}+\text{Na}]^+$  calculated for  $\text{C}_{29}\text{H}_{21}\text{F}_3\text{NaO}_3$ : 497.1335, found: 497.1356. The enantiomeric excess was determined by UPLC with Chiralpark MD column (hexanes:2-propanol = 85:15, 1 mL/min, 211 nm, 92% *ee*, *d.r.* > 19:1); major enantiomer *tr* = 5.355 min, minor enantiomer *tr* = 6.841 min.

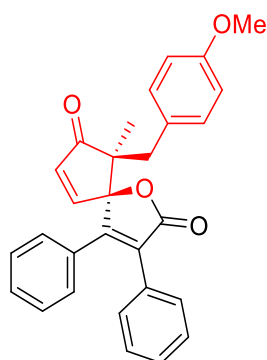

**(5R,6S)-6-(4-methoxybenzyl)-6-methyl-3,4-diphenyl-1-oxaspiro[4.4]nona-3,8-diene-2,7-dione (3t) :**

Yellow solid (72.9 mg, 84% yield), mp 159-162°C, purified by column chromatography ( $\text{SiO}_2$ , PE/EA = 4:1).  $[\alpha]_{\text{D}}^{25} = -178.0$  ( $c = 2.43$ ,  $\text{CHCl}_3$ ).  $^1\text{H}$  NMR (400 MHz,  $\text{CDCl}_3$ )  $\delta$  7.34 (d,  $J = 6.0$  Hz, 1H), 7.22 - 7.09 (m, 8H), 7.00 - 6.95 (m, 2H), 6.93 - 6.86 (m, 2H), 6.75 - 6.68 (m, 2H), 6.40 (d,  $J = 6.0$  Hz, 1H), 3.68 (s, 3H), 2.94 (s, 2H), 0.84 (s, 3H).  $^{13}\text{C}$  NMR (100 MHz,  $\text{CDCl}_3$ )  $\delta$  206.1, 170.6, 159.8, 158.4, 155.9, 136.3, 132.0, 131.8, 129.9, 129.8, 129.6, 129.2, 129.2, 129.0, 128.9, 128.4, 128.2, 113.4, 95.3, 77.5, 77.2, 76.8, 58.1, 55.2, 43.3, 17.7. HRMS (ESI)  $m/z$ :  $[\text{M}+\text{Na}]^+$  calculated for  $\text{C}_{29}\text{H}_{24}\text{NaO}_4$ : 459.1567, found: 459.1579. The enantiomeric excess was determined by UPLC with Chiralpark MD column (hexanes:2-propanol = 85:15, 1 mL/min, 211 nm, 93% *ee*, *d.r.* > 19:1); major enantiomer *tr* = 7.303 min, major enantiomer *tr* = 5.483 min, minor enantiomer *tr* = 9.260 min.

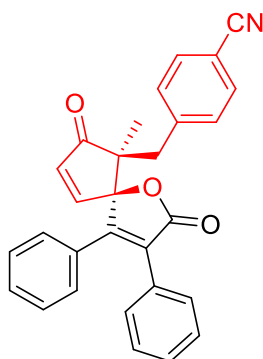

**4-(((5R,6S)-6-methyl-2,7-dioxo-3,4-diphenyl-1-oxaspiro[4.4]nona-3,8-dien-6-yl)methyl) benzonitrile (3u) :**

Yellow oil (85.4 mg, 99% yield), purified by column chromatography (SiO<sub>2</sub>, PE/EA= 4:1).  $[\alpha]_D^{25} = -41.2$  (c = 0.38, CHCl<sub>3</sub>). <sup>1</sup>H NMR (400 MHz, CDCl<sub>3</sub>)  $\delta$  7.50 - 7.43 (m, 2H), 7.39 (d, *J* = 6.0 Hz, 1H), 7.22 - 7.10 (m, 10H), 6.94 - 6.86 (m, 2H), 6.42 (d, *J* = 6.0 Hz, 1H), 3.08 - 2.93 (m, 2H), 0.86 (s, 3H). <sup>13</sup>C NMR (100 MHz, CDCl<sub>3</sub>)  $\delta$  205.4, 170.3, 159.4, 156.4, 141.9, 136.2, 131.8, 131.7, 131.5, 130.0, 123.0, 129.5, 129.2, 129.1, 129.0, 128.9, 128.4, 118.9, 110.8, 94.9, 77.5, 77.2, 76.8, 57.8, 44.1, 17.7. HRMS (ESI) *m/z*: [M+H]<sup>+</sup> calculated for C<sub>29</sub>H<sub>22</sub>NO<sub>3</sub>: 432.1594, found: 432.1603. The enantiomeric excess was determined by UPLC with Chiralpark ND column (hexanes:2-propanol = 75:25, 1 mL/min, 211 nm, 91% *ee*, *d.r.* = 17:1); major enantiomer *tr* = 6.348 min, major enantiomer *tr* = 13.996 min, minor enantiomer *tr* = 5.272 min.

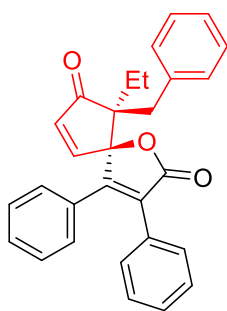

**(5R,6S)-6-benzyl-6-ethyl-3,4-diphenyl-1-oxaspiro[4.4]nona-3,8-diene-2,7-dione (3v):**

Yellow solid (26.5 mg, 32% yield), mp 111-114°C, purified by column chromatography (SiO<sub>2</sub>, PE/EA= 4:1).  $[\alpha]_D^{25} = -19.5$  (c = 0.80, CHCl<sub>3</sub>). <sup>1</sup>H NMR (400 MHz, CDCl<sub>3</sub>)  $\delta$  7.41 (d, *J* = 6.0 Hz, 1H), 7.26 - 7.11 (m, 16H), 7.10 - 7.06 (m, 1H), 7.06 - 7.01 (m, 2H), 6.99 - 6.92 (m, 2H), 6.58 (d, *J* = 6.0 Hz, 0.4H) (minor), 6.36 (d, *J* = 5.6 Hz, 1H) (major),

3.21 - 3.05 (m, 2H), 2.87 (d,  $J = 15.6$  Hz, 0.4H) (minor), 2.50 (d,  $J = 15.6$  Hz, 0.4H) (minor), 1.91 - 1.81 (m, 0.4H) (minor), 1.76 - 1.63 (m, 0.4H) (minor), 1.51 - 1.38 (m, 1H), 1.17 - 1.08 (m, 1H), 1.06 - 0.92 (m, 3H), 0.79 - 0.68 (m, 1H).  $^{13}\text{C}$  NMR (100 MHz,  $\text{CDCl}_3$ )  $\delta$  205.5, 170.4, 159.5, 157.1, 156.1, 136.5, 136.4, 136.2, 131.9, 130.9, 130.7, 130.1, 123.0, 129.9, 129.5, 129.5, 129.3, 129.3, 129.1, 129.1, 129.1, 128.8, 128.6, 128.5, 128.4, 128.2, 126.9, 126.7, 96.0, 95.4, 65.9, 61.0, 40.6, 34.7, 29.5, 22.3, 10.4, 7.7. HRMS (ESI)  $m/z$ :  $[\text{M}+\text{Na}]^+$  calculated for  $\text{C}_{29}\text{H}_{24}\text{NaO}_3$ : 443.1618, found: 443.1599. The enantiomeric excess was determined by UPLC with Chiralpark ND column (hexanes:2-propanol = 75:25, 0.6 mL/min, 211 nm, 72% *ee* (major), 85% *ee* (minor), *d.r.* = 2:1); major enantiomer *tr* = 6.994 min, major enantiomer *tr* = 14.380 min, minor enantiomer *tr* = 7.526 min, minor enantiomer *tr* = 16.758 min.

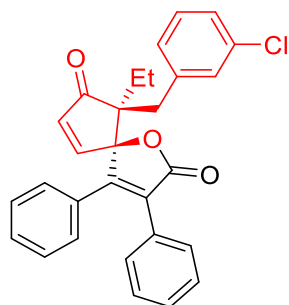

**(5R,6S)-6-(3-chlorobenzyl)-6-ethyl-3,4-diphenyl-1-oxaspiro[4.4]nona-3,8-diene-2,7-dione (3w):**

Yellow solid (31.2 mg, 34% yield), mp 100-103°C, purified by column chromatography ( $\text{SiO}_2$ , PE/EA= 4:1).  $[\alpha]_D^{25} = -5.8$  ( $c = 1.13$ ,  $\text{CHCl}_3$ ).  $^1\text{H}$  NMR (400 MHz,  $\text{CDCl}_3$ )  $\delta$  7.43 (d,  $J = 5.6$  Hz, 0.4H) (minor), 7.28 (d,  $J = 6.0$  Hz, 1H) (major), 7.25 - 7.13 (m, 12H), 7.11 (d,  $J = 5.2$  Hz, 2H), 7.09 - 6.99 (m, 2H), 6.96 (d,  $J = 7.6$  Hz, 2H), 6.94 - 6.91 (m, 1H), 6.61 (d,  $J = 5.6$  Hz, 0.4H) (minor), 6.38 (d,  $J = 6.0$  Hz, 1H) (major), 3.08 (q,  $J = 14.0$  Hz, 2H), 2.83 (d,  $J = 15.6$  Hz, 0.4H) (minor), 2.44 (d,  $J = 16.0$  Hz, 0.4H) (minor), 1.85 - 1.75 (m, 0.4H) (minor), 1.74 - 1.64 (m, 0.4H) (minor), 1.50 - 1.38 (m, 1H), 1.17 - 1.09 (m, 1H), 1.01 - 0.92 (m, 3H), 0.77 - 0.68 (m, 1H).  $^{13}\text{C}$  NMR (100 MHz,  $\text{CDCl}_3$ )  $\delta$  205.2, 159.3, 156.3, 151.1, 138.5, 136.4, 134.0, 131.8, 130.8, 130.0, 129.5, 129.4, 129.2, 129.1, 128.8, 128.6, 128.6, 127.2, 95.3, 77.5, 77.2, 76.8, 61.6, 40.2, 22.4, 7.6. HRMS (ESI)  $m/z$ :  $[\text{M}+\text{Na}]^+$  calculated for  $\text{C}_{29}\text{H}_{23}\text{ClNaO}_3$ : 477.1228, found: 477.1243.

The enantiomeric excess was determined by UPLC with Chiralpark INB column (hexanes:2-propanol = 75:25, 1 mL/min, 211 nm, 67% *ee* (major), 76% *ee* (minor), *d.r.* = 3:1); major enantiomer *tr* = 6.039 min, major enantiomer *tr* = 7.812 min, minor enantiomer *tr* = 4.176 min, minor enantiomer *tr* = 4.873 min.

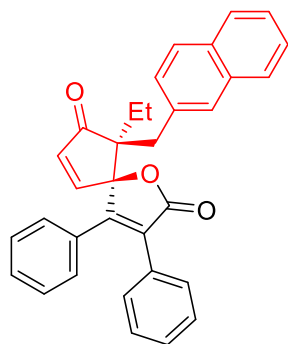

**(5*R*,6*S*)-6-ethyl-6-(naphthalen-2-ylmethyl)-3,4-diphenyl-1-oxaspiro[4.4]nona-3,8-diene-2,7-dione (3x):**

Yellow solid (54.5 mg, 58% yield), mp 168-171°C, purified by column chromatography (SiO<sub>2</sub>, PE/EA= 4:1).  $[\alpha]_D^{25} = -54.4$  (c = 1.57, CHCl<sub>3</sub>). <sup>1</sup>H NMR (400 MHz, CDCl<sub>3</sub>)  $\delta$  7.76 - 7.68 (m, 3H), 7.68 - 7.60 (m, 1.4H), 7.60 - 7.51 (m, 1.4H), 7.46 - 7.32 (m, 3H), 7.26 - 7.05 (m, 14H), 7.01 - 6.89 (m, 3H), 6.60 (d, *J* = 5.6 Hz, 0.4H) (minor), 6.30 (d, *J* = 5.6 Hz, 1H) (major), 3.35 (d, *J* = 13.6 Hz, 1H) (major), 3.21 (d, *J* = 13.6 Hz, 1H) (major), 3.06 (d, *J* = 16.4 Hz, 0.4H) (minor), 2.61 (d, *J* = 16.4 Hz, 0.4H) (minor), 1.84 - 1.70 (m, 0.5H) (minor), 1.60 - 1.45 (m, 1H), 1.32 - 1.21 (m, 1H), 1.08 - 0.93 (m, 3H) (major), 0.80 - 0.70 (m, 1.3H) (minor). <sup>13</sup>C NMR (100 MHz, CDCl<sub>3</sub>)  $\delta$  205.8, 205.6, 170.6, 170.4, 159.4, 159.3, 157.3, 156.1, 136.5, 136.2, 134.2, 134.1, 133.3, 132.4, 132.2, 131.9, 131.8, 131.2, 130.7, 130.1, 129.9, 129.8, 129.5, 129.5, 129.2, 129.2, 129.2, 129.1, 129.1, 129.1, 129.0, 128.8, 128.5, 128.4, 128.0, 127.9, 127.8, 127.6, 127.6, 126.3, 126.0, 125.8, 125.8, 95.9, 95.4, 61.9, 60.9, 40.8, 34.9, 29.6, 22.9, 10.3, 7.7. HRMS (ESI) *m/z*: [M+Na]<sup>+</sup> calculated for C<sub>33</sub>H<sub>26</sub>NaO<sub>3</sub>: 493.1774, found: 493.1787. The enantiomeric excess was determined by UPLC with Chiralpark MD column (hexanes:2-propanol = 75:25, 1 mL/min, 211 nm, 84% *ee* (major), 71% *ee* (minor), *d.r.* = 2:1); major enantiomer *tr* = 4.214 min, major enantiomer *tr* = 6.356 min, minor enantiomer *tr* = 3.457 min, minor enantiomer *tr* = 3.828 min.

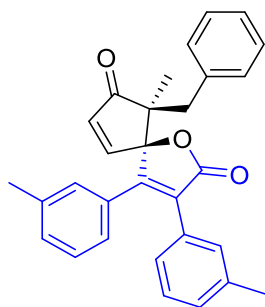

**(5R,6S)-6-benzyl-6-methyl-3,4-di-m-tolyl-1-oxaspiro[4.4]nona-3,8-diene-2,7-dione (3y):**

Yellow solid (86.0 mg, 99% yield), mp 140-143°C, purified by column chromatography (SiO<sub>2</sub>, PE/EA= 4:1).  $[\alpha]_D^{25} = -63.9$  (c = 2.57, CHCl<sub>3</sub>). <sup>1</sup>H NMR (400 MHz, CDCl<sub>3</sub>)  $\delta$  7.41 (d, *J* = 5.6 Hz, 1H), 7.23 (m, 3H), 7.17 - 7.02 (m, 7H), 6.96 - 6.88 (m, 1H), 6.80 - 6.70 (m, 2H), 6.47 (d, *J* = 6.0 Hz, 1H), 3.06 (s, 2H), 2.25 (s, 3H), 2.16 (s, 3H), 0.95 (s, 3H). <sup>13</sup>C NMR (100 MHz, CDCl<sub>3</sub>)  $\delta$  206.1, 170.7, 159.8, 156.0, 138.5, 137.9, 136.2, 136.0, 131.8, 131.1, 130.4, 130.1, 129.9, 129.7, 129.5, 129.1, 128.7, 128.1, 128.0, 126.8, 126.6, 126.4, 95.1, 77.5, 77.2, 76.8, 58.0, 43.9, 21.4, 21.4, 17.8. HRMS (ESI) *m/z*: [M+H]<sup>+</sup> calculated for C<sub>30</sub>H<sub>27</sub>O<sub>3</sub>: 435.1955, found: 435.1970. The enantiomeric excess was determined by HPLC with Chiralpark OD column (hexanes:2-propanol = 75:25, 1 mL/min, 245 nm, 95% *ee*, *d.r.* = 17:1); major enantiomer *tr* = 12.601 min, major enantiomer *tr* = 15.112 min, minor enantiomer *tr* = 10.183 min.

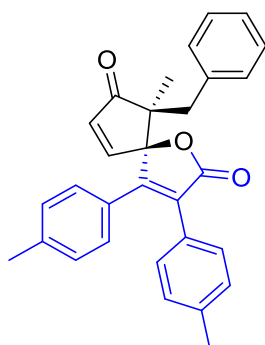

**(5R,6S)-6-benzyl-6-methyl-3,4-di-p-tolyl-1-oxaspiro[4.4]nona-3,8-diene-2,7-dione (3z):**

Yellow oil (36.1 mg, 42% yield), purified by column chromatography (SiO<sub>2</sub>, PE/EA= 4:1).  $[\alpha]_D^{25} = -53.4$  (c = 0.88, CHCl<sub>3</sub>). <sup>1</sup>H NMR (400 MHz, CDCl<sub>3</sub>)  $\delta$  7.41 (d, *J* = 5.6 Hz, 1H), 7.26 - 7.18 (m, 3H), 7.16 - 7.11 (m, 4H), 7.06 (d, *J* = 8.0 Hz, 2H), 7.01 (d, *J* = 8.0

Hz, 2H), 6.86 (d,  $J = 8.0$  Hz, 2H), 6.48 (d,  $J = 5.6$  Hz, 1H), 3.06 (s, 2H), 2.29 (d,  $J = 13.2$  Hz, 6H), 0.93 (s, 3H).  $^{13}\text{C}$  NMR (100 MHz,  $\text{CDCl}_3$ )  $\delta$  206.2, 171.0, 159.2, 156.1, 140.0, 139.0, 136.3, 136.2, 131.1, 129.7, 129.4, 129.4, 129.2, 129.1, 129.0, 128.0, 126.9, 126.5, 95.2, 77.5, 77.4, 77.2, 76.8, 58.2, 44.2, 21.5, 21.4, 17.7. HRMS (ESI)  $m/z$ :  $[\text{M}+\text{H}]^+$  calculated for  $\text{C}_{30}\text{H}_{27}\text{O}_3$ : 435.1955, found: 435.1960. The enantiomeric excess was determined by HPLC with Chiralpark OD column (hexanes:2-propanol = 75:25, 1 mL/min, 210 nm, 85% *ee*, *d.r.* > 19:1); major enantiomer *tr* = 7.219 min, minor enantiomer *tr* = 8.456 min.

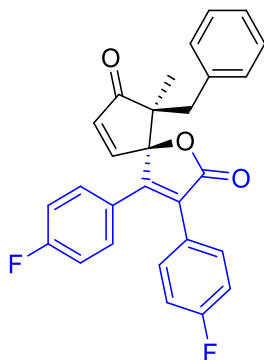

**(5R,6S)-6-benzyl-3,4-bis(4-fluorophenyl)-6-methyl-1-oxaspiro[4.4]nona-3,8-diene-2,7-dione (3aa):**

Yellow oil (56.1 mg, 63% yield), purified by column chromatography ( $\text{SiO}_2$ , PE/EA = 4:1).  $[\alpha]_D^{25} = -80.9$  ( $c = 0.64$ ,  $\text{CHCl}_3$ ).  $^1\text{H}$  NMR (400 MHz,  $\text{CDCl}_3$ )  $\delta$  7.41 (d,  $J = 6.0$  Hz, 1H), 7.25 - 7.16 (m, 4H), 7.14 - 7.10 (m, 2H), 7.00 - 6.93 (m, 6H), 6.52 (d,  $J = 5.6$  Hz, 1H), 3.07 (s, 2H), 0.93 (s, 3H).  $^{13}\text{C}$  NMR (100 MHz,  $\text{CDCl}_3$ )  $\delta$  205.7, 170.3, 164.4 (d,  $J = 28.2$  Hz), 161.9 (d,  $J = 26.0$  Hz), 158.5, 155.5, 136.5, 136.1, 131.6 (d,  $J = 8.4$  Hz), 131.2 (d,  $J = 8.4$  Hz), 131.1, 129.4, 128.1, 127.7 (d,  $J = 3.6$  Hz), 127.0, 125.0 (d,  $J = 3.2$  Hz), 116.5 (d,  $J = 21.7$  Hz), 115.8 (d,  $J = 21.4$  Hz), 95.2, 58.2, 44.0, 17.8.  $^{19}\text{F}$  NMR (500 MHz,  $\text{CDCl}_3$ )  $\delta$  -108.5 - -109.6 (m), -110.6 - -110.9 (m). HRMS (ESI)  $m/z$ :  $[\text{M}+\text{Na}]^+$  calculated for  $\text{C}_{28}\text{H}_{20}\text{F}_2\text{NaO}_3$ : 465.1273, found: 465.1278. The enantiomeric excess was determined by HPLC with Chiralpark OD column (hexanes:2-propanol = 75:25, 1 mL/min, 210 nm, 84% *ee*, *d.r.* > 19:1); major enantiomer *tr* = 9.642 min, major enantiomer *tr* = 8.742 min, minor enantiomer *tr* = 6.601 min.



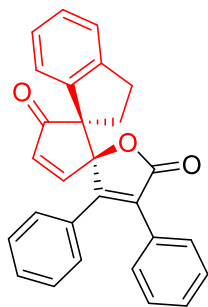

**(1'S,2R)-3,4-diphenyl-2'',3''-dihydro-5H-dispiro[furan-2,2'-cyclopentane]1',1''inden]-3'-ene-5,5'-dione (3ab):**

Yellow oil (75.8 mg, 94% yield), purified by column chromatography (SiO<sub>2</sub>, PE/EA= 4:1).  $[\alpha]_D^{25} = -302.0$  (c = 2.53, CHCl<sub>3</sub>). <sup>1</sup>H NMR (400 MHz, CDCl<sub>3</sub>)  $\delta$  7.69 (d, *J* = 5.8 Hz, 0.4H) (minor), 7.66 (d, *J* = 5.8 Hz, 1H) (major), 7.26 - 6.91 (m, 17H), 6.86 - 6.79 (m, 0.4H) (minor), 6.77 (d, *J* = 5.9 Hz, 0.4H) (minor), 6.66 (d, *J* = 5.9 Hz, 1H) (major), 6.59 - 6.50 (m, 1H), 6.36 - 6.29 (m, 0.4H) (minor), 5.74 (d, *J* = 7.7 Hz, 0.4H) (minor), 4.07 - 3.97 (m, 0.3H) (minor), 3.11 - 2.92 (m, 1.4H), 2.89 - 2.73 (m, 1.4H), 2.70 - 2.61 (m, 0.4H) (minor), 2.46 - 2.35 (m, 0.4H) (minor), 1.95 (s, 2.4H). <sup>13</sup>C NMR (100 MHz, CDCl<sub>3</sub>)  $\delta$  205.9, 202.3, 170.6, 170.4, 159.9, 159.0, 157.1, 156.8, 145.4, 143.7, 140.2, 139.6, 138., 138.0, 131.9, 130.9, 130.0, 129.5, 129.1, 129.4, 129.1, 129.1, 129.0, 129.0, 129.0, 128.5, 128.5, 128.3, 128.3, 128.0, 126.2, 126.0, 125.5, 125.4, 125.3, 124.4, 95.0, 94.7, 77.5, 77.4, 77.2, 76.8, 69.8, 68.6, 36.0, 31.6, 31.3, 30.1. HRMS (ESI) *m/z*: [M+Na]<sup>+</sup> calculated for C<sub>28</sub>H<sub>20</sub>NaO<sub>3</sub>: 427.1305, found: 427.1320. The enantiomeric excess was determined by HPLC with Chiralpark AD column (hexanes:2-propanol = 80:20, 1 mL/min, 210 nm, 83% *ee* (major), 97% *ee* (minor), *d.r.* = 3:1); major enantiomer *tr* = 8.228 min, major enantiomer *tr* = 7.479 min, minor enantiomer *tr* = 19.097 min, minor enantiomer *tr* = 15.857 min.

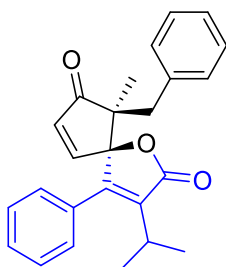

**(5R,6S)-6-benzyl-3-isopropyl-6-methyl-4-phenyl-1-oxaspiro[4.4]nona-3,8-diene-2,7-dione (3ac):**

Yellow oil (42.5 mg, 57% yield), purified by column chromatography (SiO<sub>2</sub>, PE/EA= 4:1).  $[\alpha]_D^{25} = 50.4$  (c = 1.52, CHCl<sub>3</sub>). <sup>1</sup>H NMR (400 MHz, CDCl<sub>3</sub>)  $\delta$  7.32 (m, 2.1 Hz, 4H), 7.26 - 7.18 (m, 3H), 7.11 - 7.06 (m, 2H), 7.00 - 6.96 (m, 2H), 6.41 (d, *J* = 5.6 Hz, 1H), 3.00 (s, 2H), 2.73 - 2.65 (m, 1H), 1.25 (d, *J* = 6.8 Hz, 3H), 1.16 (d, *J* = 7.2 Hz, 3H), 0.88 (s, 3H). <sup>13</sup>C NMR (100 MHz, CDCl<sub>3</sub>)  $\delta$  206.2, 170.7, 158.7, 156.3, 136.8, 136.4, 135.7, 131.8, 131.0, 129.5, 128.9, 128.7, 128.0, 126.8, 94.9, 77.5, 77.4, 77.2, 76.8, 57.8, 43.7, 25.7, 20.6, 20.2, 17.9. HRMS (ESI) *m/z*: [M+Na]<sup>+</sup> calculated for C<sub>23</sub>H<sub>20</sub>NaO<sub>3</sub>: 395.1618, found: 395.1602. The enantiomeric excess was determined by HPLC with Chiralpark OX column (hexanes:2-propanol = 75:25, 1 mL/min, 210 nm, 86% *ee*, *d.r.* > 19:1); major enantiomer *tr* = 21.392 min, major enantiomer *tr* = 19.476 min, minor enantiomer *tr* = 20.405 min.

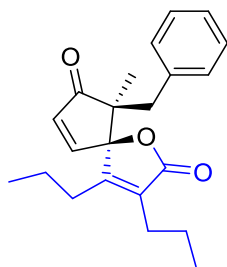

**(5*R*,6*S*)-6-benzyl-6-methyl-3,4-dipropyl-1-oxaspiro[4.4]nona-3,8-diene-2,7-dione (3ad):**

Yellow oil (37.1 mg, 55% yield), purified by column chromatography (SiO<sub>2</sub>, PE/EA= 4:1).  $[\alpha]_D^{25} = -97.4$  (c = 0.89, CHCl<sub>3</sub>). <sup>1</sup>H NMR (400 MHz, CDCl<sub>3</sub>)  $\delta$  7.26 - 7.19 (m, 3H), 7.10 - 7.01 (m, 3H), 6.34 (d, *J* = 5.9 Hz, 1H), 3.02 - 2.88 (m, 2H), 2.40 - 2.17 (m, 3H), 1.65 - 1.57 (m, 2H), 1.56 - 1.47 (m, 1H), 1.43 - 1.32 (m, 1H), 1.30 - 1.18 (m, 1H), 0.99 - 0.94 (m, 3H), 0.93 (s, 3H), 0.91 - 0.84 (m, 3H). <sup>13</sup>C NMR (100 MHz, CDCl<sub>3</sub>)  $\delta$  205.8, 173.0, 162.7, 156.5, 136.3, 135.0, 130.9, 129.5, 128.1, 127.0, 95.0, 77.5, 77.2, 76.8, 58.5, 45.5, 29.2, 26.5, 22.7, 21.3, 15.8, 14.5, 14.1. HRMS (ESI) *m/z*: [M+Na]<sup>+</sup> calculated for C<sub>23</sub>H<sub>20</sub>NaO<sub>3</sub>: 361.1774, found: 361.1756. The enantiomeric excess was determined by HPLC with Chiralpark OX column (hexanes:2-propanol = 85:15, 0.6 mL/min, 210 nm, 65% *ee*, *d.r.* > 19:1); major enantiomer *tr* = 11.968 min, minor enantiomer *tr* = 12.653 min.

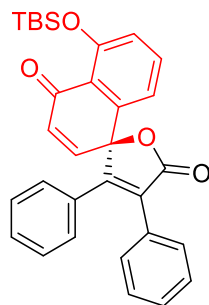

**(S)-5'-((tert-butyldimethylsilyloxy)-3,4-diphenyl-4'H,5H-spiro[furan-2,1'-naphthalene]-4',5-dione (5):**

Yellow oil (85.0 mg, 86% yield), purified by column chromatography (SiO<sub>2</sub>, PE/EA= 4:1).  $[\alpha]_D^{25} = 121.7$  (c = 2.80, CHCl<sub>3</sub>). <sup>1</sup>H NMR (400 MHz, x` CDCl<sub>3</sub>)  $\delta$  7.79 - 7.73 (m, 0.2H) (minor), 7.52 (d, *J* = 6.5 Hz, 1H), 7.48 - 7.40 (m, 1.3H), 7.34 - 7.20 (m, 4H), 7.20 - 7.05 (m, 3H), 7.01 - 6.95 (m, 0.8H), 6.78 - 6.70 (m, 2H), 6.65 (d, *J* = 10.0 Hz, 1H) (major), 6.56 (d, *J* = 10.0 Hz, 0.2H) (minor), 6.42 (d, *J* = 10.0 Hz, 0.2H) (minor), 6.37 (d, *J* = 10.0 Hz, 1H) (major), 1.02 (s, 7H) (major), 0.95 (s, 2H) (minor), 0.29 (s, 0.6H) (minor), 0.21 (s, 2H) (major), 0.17 (s, 2H) (major), 0.13 (s, 0.6H) (minor). <sup>13</sup>C NMR (100 MHz, CDCl<sub>3</sub>)  $\delta$  206.1, 205.1, 171.3, 170.4, 159.4, 156.2, 154.8, 149.8, 147.9, 136.9, 135.7, 135.0, 134.2, 133.5, 132.9, 132.5, 132.5, 132.2, 131.7, 131.6, 131.4, 131.0, 130.3, 130.1, 129.9, 129.8, 129.6, 129.3, 129.3, 129.2, 129.1, 129.0, 128.8, 128.5, 128.5, 128.5, 128.4, 125.5, 125.4, 125.0, 95.8, 95.3, 77.5, 77.2, 76.8, 60.5, 56.9, 40.4, 36.4, 16.2, 14.3. HRMS (ESI) *m/z*: [M+Na]<sup>+</sup> calculated for C<sub>23</sub>H<sub>20</sub>NaO<sub>3</sub>: 517.1806, found: 517.1807. The enantiomeric excess was determined by HPLC with Chiralpark OD column (hexanes:2-propanol = 85:15, 0.6 mL/min, 210 nm, 92% *ee*(major), 87% *ee* (minor), *r.r.* = 4:1); major enantiomer *tr* = 12.096 min, major enantiomer *tr* = 13.901 min, minor enantiomer *tr* = 10.693 min, minor enantiomer *tr* = 9.097 min.

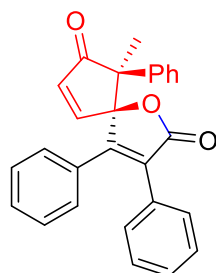

**(5R,6S)-6-methyl-3,4,6-triphenyl-1-oxaspiro[4.4]nona-3,8-diene-2,7-dione (10):**

Yellow oil (17.7 mg, 23% yield), purified by column chromatography (SiO<sub>2</sub>, PE/EA= 4:1).  $[\alpha]_D^{25} = -338.6$  (c = 0.59, CHCl<sub>3</sub>). Major: <sup>1</sup>H NMR (400 MHz, CDCl<sub>3</sub>) δ 7.45 (d, J = 5.8 Hz, 1H), 7.19 (s, 1H), 7.16 - 7.07 (m, 5H), 7.06 - 6.92 (m, 5H), 6.91 - 6.80 (m, 4H), 6.63 (d, J = 5.8 Hz, 1H), 1.70 (s, 3H). Minor: <sup>1</sup>H NMR (400 MHz, CDCl<sub>3</sub>) δ 7.67 (d, J = 5.8 Hz, 1H), 7.29 (dd, J = 7.9, 5.7 Hz, 3H), 7.23 - 7.18 (m, 6H), 7.16 - 7.03 (m, 4H), 6.71 (d, J = 5.8 Hz, 1H), 1.12 (s, 3H). Major: <sup>13</sup>C NMR (100 MHz, CDCl<sub>3</sub>) δ 205.3, 160.6, 156.0, 138.7, 136.3, 130.8, 129.5, 129.3, 129.2, 129.0, 128.7, 128.4, 128.1, 127.3, 127.1, 96.7, 77.5, 77.2, 76.8, 58.9, 29.0. Minor: <sup>13</sup>C NMR (100 MHz, CDCl<sub>3</sub>) δ 207.2, 169.3, 158.0, 156.1, 139.1, 136.8, 132.9, 131.4, 130.2, 129.6, 129.3, 129.2, 128.8, 128.6, 128.5, 127.8, 127.7, 94.4, 77.5, 77.2, 76.8, 60.4, 22.7. HRMS (ESI) m/z: [M+Na]<sup>+</sup> calculated for C<sub>27</sub>H<sub>20</sub>NaO<sub>3</sub>: 392.4512, found: 392.4516. The enantiomeric excess was determined by UPLC with Chiralpark ND column (hexanes:2-propanol = 85:15, 0.6 mL/min, 211 nm, 70% ee (major), 76% ee (minor), *d.r.* = 4:1); major: major enantiomer *tr* = 6.345 min, minor enantiomer *tr* = 13.960 min; minor: major enantiomer *tr* = 11.851 min, minor enantiomer *tr* = 26.886 min

**Table S1. The effect of P-ligands L1-L10 in the reaction.<sup>a</sup>**

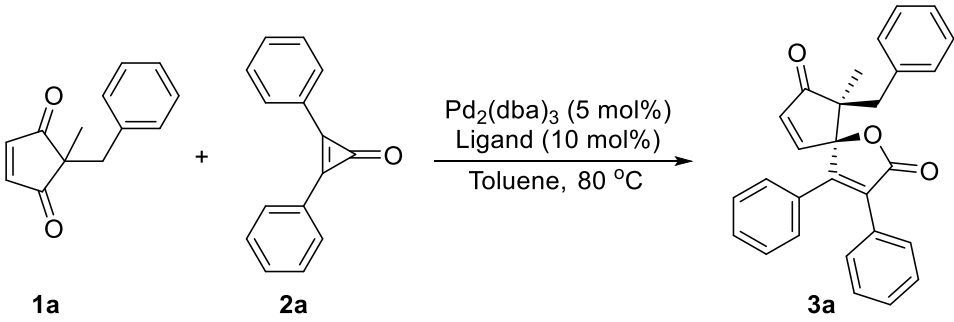

| Entry          | Ligand           | Yield of <b>3a</b> (%) <sup>a</sup> | <i>ee</i> of <b>3a</b> (%) <sup>b</sup> | <i>dr</i> of <b>3a</b> (%) <sup>c</sup> |
|----------------|------------------|-------------------------------------|-----------------------------------------|-----------------------------------------|
| 1 <sup>d</sup> | PPh <sub>3</sub> | 29                                  | race                                    | > 19:1                                  |
| 2              | <b>L1</b>        | nr                                  | /                                       | /                                       |
| 3              | <b>L2</b>        | 30                                  | 22                                      | > 19:1                                  |
| 4              | <b>L3</b>        | nr                                  | /                                       | /                                       |
| 5              | <b>L4</b>        | 16                                  | 57                                      | 12:1                                    |
| 6              | <b>L5</b>        | 24                                  | 62                                      | 4:1                                     |
| 7              | <b>L6</b>        | 30                                  | 68                                      | 7:1                                     |
| 8              | <b>L7</b>        | 34                                  | 70                                      | 19:1                                    |
| 9              | <b>L8</b>        | 7                                   | 30                                      | 2:1                                     |
| 10             | <b>L9</b>        | trace                               | /                                       | /                                       |
| 11             | <b>L10</b>       | 15                                  | 57                                      | 7:1                                     |

All the reactions were run on a 0.1 mmol scale in 1.0 mL solvents for 18 h. <sup>a</sup>Determined by <sup>1</sup>H NMR using dibromomethane as an internal standard. <sup>b</sup>Determined by HPLC. <sup>c</sup>Determined by <sup>1</sup>H NMR. <sup>d</sup>Yield of the isolated product.

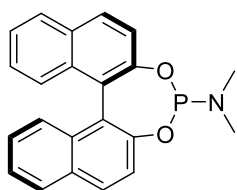

**L1**

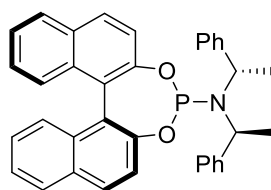

**L2**

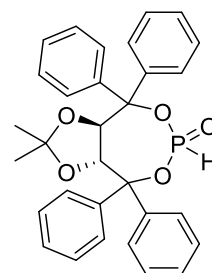

**L3**

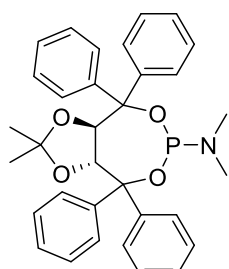

**L4**

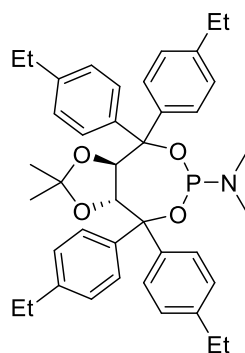

**L5**

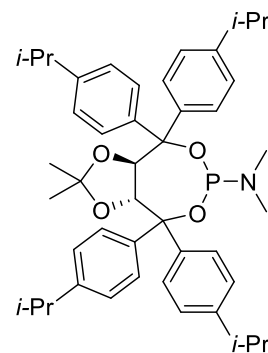

**L6**

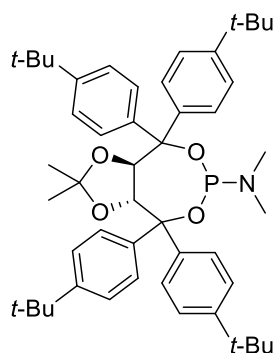

**L7**

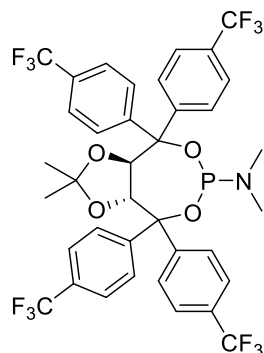

**L8**

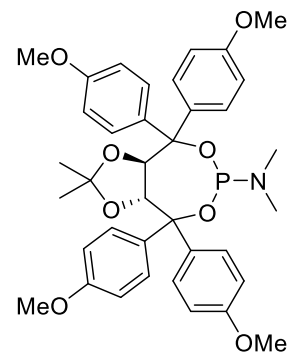

**L9**

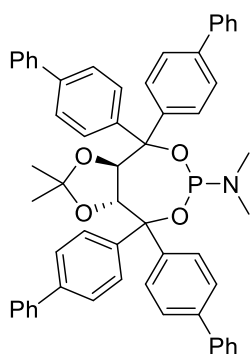

**L10**

**Table S2. The screen of temp in the reaction.<sup>a</sup>**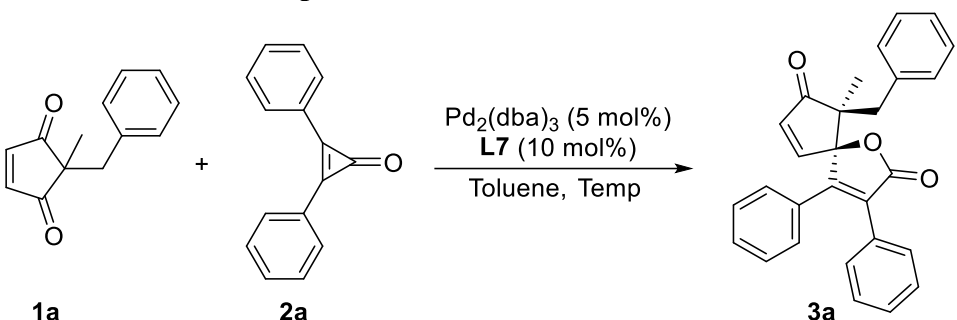

Reaction scheme showing the synthesis of **3a** from **1a** and **2a** using  $\text{Pd}_2(\text{dba})_3$  (5 mol%) and **L7** (10 mol%) in Toluene at various temperatures.

| Entry          | Temp (°C) | Yield of <b>3a</b> (%) <sup>a</sup> | <i>ee</i> of <b>3a</b> (%) <sup>b</sup> | <i>dr</i> of <b>3a</b> (%) <sup>c</sup> |
|----------------|-----------|-------------------------------------|-----------------------------------------|-----------------------------------------|
| 1              | 80        | 34                                  | 70                                      | 16:1                                    |
| 2              | 60        | 23                                  | 75                                      | 13:1                                    |
| 3              | 50        | 21                                  | 76                                      | 16:1                                    |
| 4              | 40        | 21                                  | 78                                      | 16:1                                    |
| 5              | rt        | 15                                  | 73                                      | > 19:1                                  |
| 6 <sup>d</sup> | 0         | 44                                  | 93                                      | > 19:1                                  |
| 7 <sup>d</sup> | rt        | 61                                  | 90                                      | > 19:1                                  |

All the reactions were run on a 0.1 mmol scale in 1.0 mL solvents for 18 h. <sup>a</sup>Determined by <sup>1</sup>H NMR using dibromomethane as an internal standard. <sup>b</sup>Determined by HPLC. <sup>c</sup>Determined by <sup>1</sup>H NMR.

<sup>d</sup>The reactions were performed with ligand **L15**.

**Table S3. The effect of P-ligands L11-L16 in the reaction.<sup>a</sup>**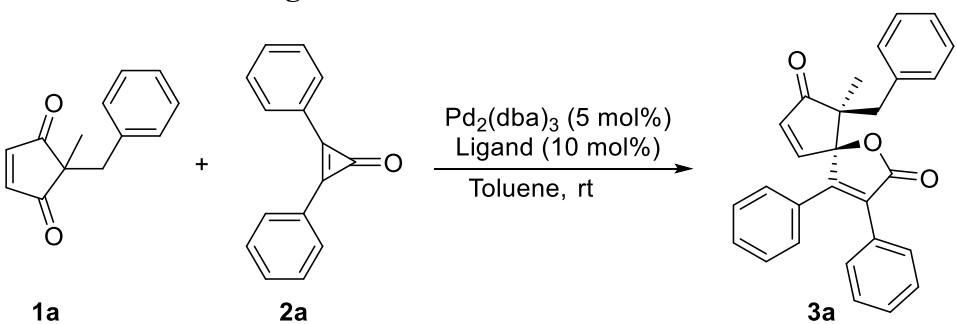

Reaction scheme showing the synthesis of **3a** from **1a** and **2a** using  $\text{Pd}_2(\text{dba})_3$  (5 mol%) and various P-ligands (L11-L16) in Toluene at room temperature.

| Entry | Ligand     | Yield of <b>3a</b> (%) <sup>a</sup> | <i>ee</i> of <b>3a</b> (%) <sup>b</sup> | <i>dr</i> of <b>3a</b> (%) <sup>c</sup> |
|-------|------------|-------------------------------------|-----------------------------------------|-----------------------------------------|
| 1     | <b>L11</b> | trace                               | /                                       | /                                       |
| 2     | <b>L12</b> | 23                                  | 89                                      | 13:1                                    |
| 3     | <b>L13</b> | 29                                  | 85                                      | 12:1                                    |
| 4     | <b>L14</b> | 24                                  | 83                                      | 16:1                                    |
| 5     | <b>L15</b> | 61                                  | 90                                      | > 19:1                                  |
| 6     | <b>L16</b> | 57                                  | 90                                      | 19:1                                    |

All the reactions were run on a 0.1 mmol scale in 1.0 mL solvents for 18 h. <sup>a</sup>Determined by <sup>1</sup>H NMR using dibromomethane as an internal standard. <sup>b</sup>Determined by HPLC. <sup>c</sup>Determined by <sup>1</sup>H NMR.

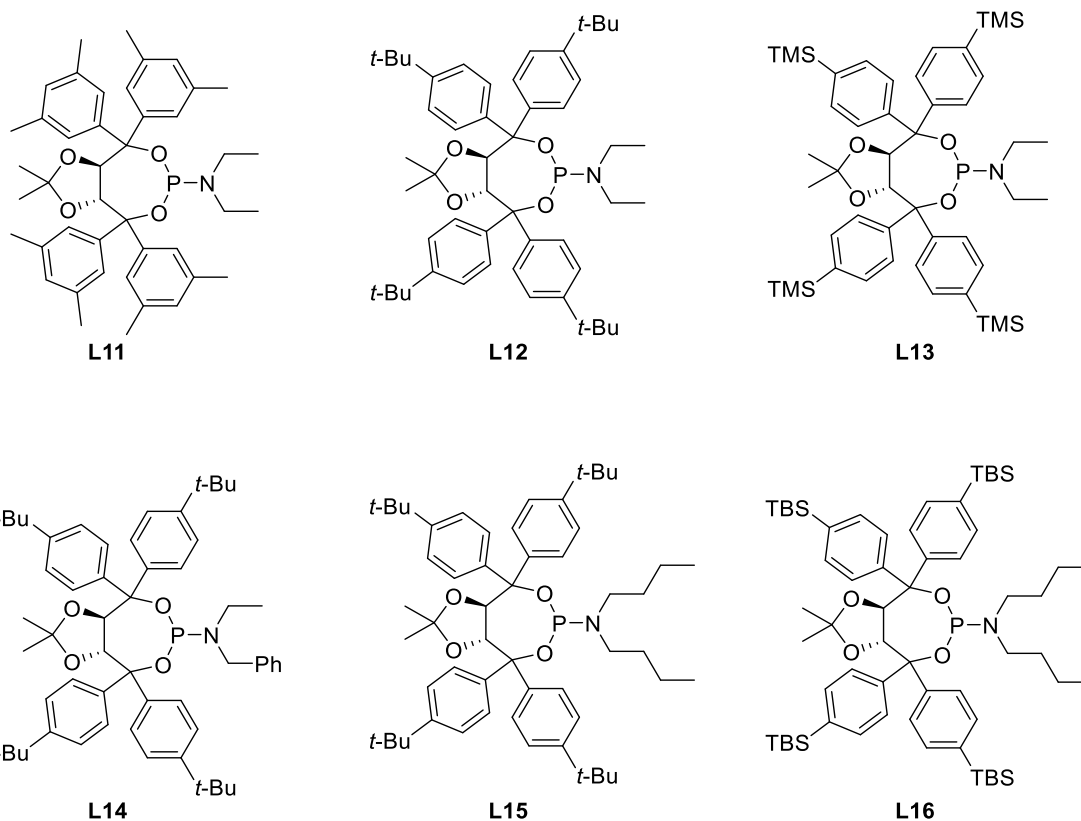

**Table S4. The screen of palladium metal salts in the reaction.<sup>a</sup>**

| Entry | Pd cat.                                               | Yield of <b>3a</b> (%) <sup>a</sup> | <i>ee</i> of <b>3a</b> (%) <sup>b</sup> | <i>dr</i> of <b>3a</b> (%) <sup>c</sup> |
|-------|-------------------------------------------------------|-------------------------------------|-----------------------------------------|-----------------------------------------|
| 1     | Pd <sub>2</sub> (dba) <sub>3</sub>                    | 61                                  | 90                                      | > 19:1                                  |
| 2     | Pd(dba) <sub>2</sub>                                  | 59                                  | 89                                      | > 19:1                                  |
| 3     | Pd <sub>2</sub> (dba) <sub>3</sub> ·CHCl <sub>3</sub> | 74                                  | 90                                      | > 19:1                                  |
| 4     | Pd(MeCN) <sub>2</sub> Cl <sub>2</sub>                 | nr                                  | /                                       | /                                       |
| 5     | PdBr <sub>2</sub>                                     | nr                                  | /                                       | /                                       |

All the reactions were run on a 0.1 mmol scale in 1.0 mL solvents for 18 h. <sup>a</sup>Determined by <sup>1</sup>H NMR using dibromomethane as an internal standard. <sup>b</sup>Determined by HPLC. <sup>c</sup>Determined by <sup>1</sup>H NMR.

**Table S5. The screen of the reaction concentration.<sup>a</sup>**

Reaction scheme showing the conversion of **1a** and **2a** to **3a** using  $\text{Pd}_2(\text{dba})_3 \cdot \text{CHCl}_3$  (5 mol%), **L15** (10 mol%), and Toluene at room temperature.

| Entry | Concentration | Yield of <b>3a</b> (%) <sup>a</sup> | <i>ee</i> of <b>3a</b> (%) <sup>b</sup> | <i>dr</i> of <b>3a</b> (%) <sup>c</sup> |
|-------|---------------|-------------------------------------|-----------------------------------------|-----------------------------------------|
| 1     | 0.025         | 61                                  | 90                                      | > 19:1                                  |
| 2     | 0.05          | 70                                  | 90                                      | > 19:1                                  |
| 3     | 0.1           | 74                                  | 90                                      | > 19:1                                  |
| 4     | 0.2           | 81                                  | 90                                      | > 19:1                                  |
| 5     | 0.5           | 87                                  | 90                                      | > 19:1                                  |
| 6     | 1             | 78                                  | 90                                      | > 19:1                                  |

All the reactions were run on a 0.1 mmol scale in X mL solvents for 18 h. <sup>a</sup>Determined by <sup>1</sup>H NMR using dibromomethane as an internal standard. <sup>b</sup>Determined by HPLC. <sup>c</sup>Determined by <sup>1</sup>H NMR.

**Table S6. The effect of P-ligands L17-L20 in the reaction.<sup>a</sup>**

Reaction scheme showing the conversion of **1a** and **2a** to **3a** using  $\text{Pd}_2(\text{dba})_3 \cdot \text{CHCl}_3$  (5 mol%), Ligand (10 mol%), and Toluene at room temperature.

| Entry | Ligand     | Yield of <b>3a</b> (%) <sup>a</sup> | <i>ee</i> of <b>3a</b> (%) <sup>b</sup> | <i>dr</i> of <b>3a</b> (%) <sup>c</sup> |
|-------|------------|-------------------------------------|-----------------------------------------|-----------------------------------------|
| 1     | <b>L15</b> | 87                                  | 90                                      | > 19:1                                  |
| 2     | <b>L17</b> | 85                                  | 90                                      | > 19:1                                  |
| 3     | <b>L18</b> | 82                                  | 90                                      | > 19:1                                  |
| 4     | <b>L19</b> | 18                                  | 61                                      | 19:1                                    |
| 5     | <b>L20</b> | 32                                  | 81                                      | 6:1                                     |

All the reactions were run on a 0.1 mmol scale in 0.2 mL solvents for 18 h. <sup>a</sup>Determined by <sup>1</sup>H NMR using dibromomethane as an internal standard. <sup>b</sup>Determined by HPLC. <sup>c</sup>Determined by <sup>1</sup>H NMR.



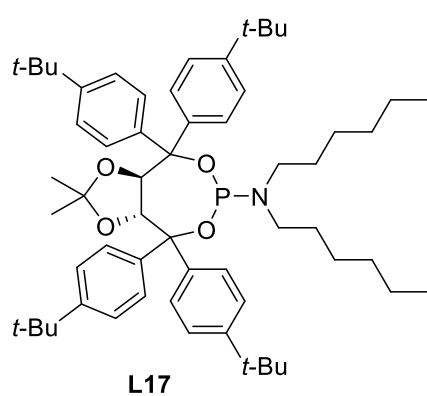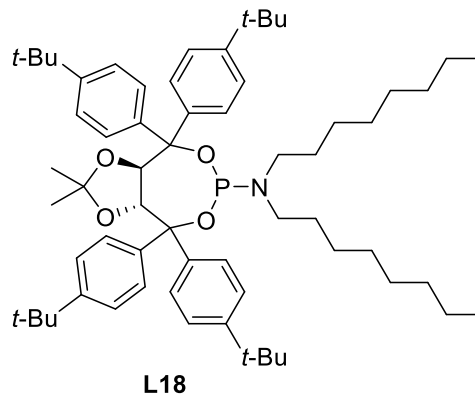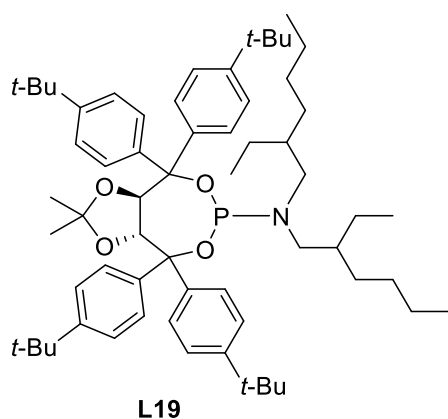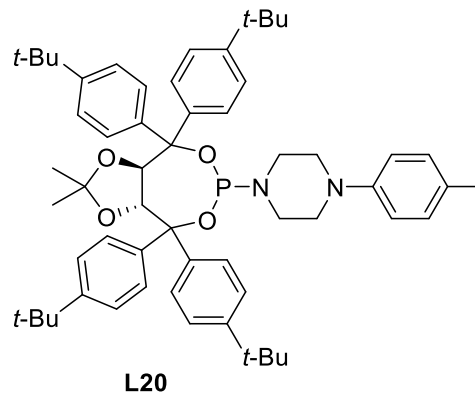

**Table S7. The screen of solvents in the reaction.<sup>a</sup>**

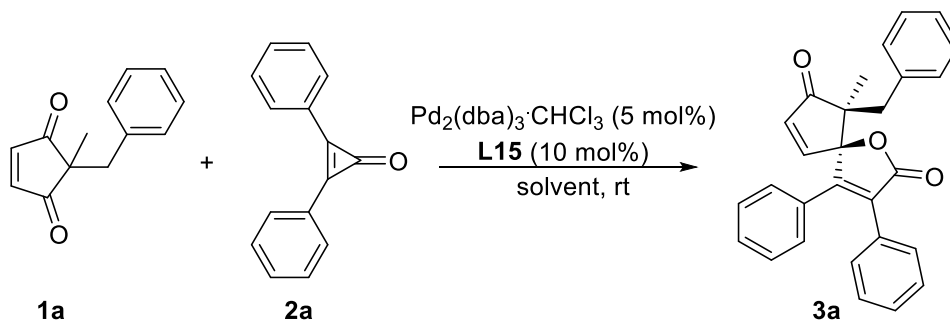

| Entry           | Solvent           | Yield of <b>3a</b> (%) <sup>a</sup> | ee of <b>3a</b> (%) <sup>b</sup> | dr of <b>3a</b> (%) <sup>c</sup> |
|-----------------|-------------------|-------------------------------------|----------------------------------|----------------------------------|
| 1               | Toluene           | 87                                  | 90                               | > 19:1                           |
| 2               | <i>o</i> -Xylene  | 78                                  | 90                               | > 19:1                           |
| 3               | <i>P</i> -Xylene  | 85                                  | 89                               | > 19:1                           |
| 4               | Mesitylene        | 74                                  | 88                               | > 19:1                           |
| 5               | PhCF <sub>3</sub> | 72                                  | 92                               | > 19:1                           |
| 6               | THF               | 32                                  | 92                               | 13:1                             |
| 7               | 2-MeTHF           | 24                                  | 90                               | 13:1                             |
| 8 <sup>d</sup>  | DMF               | 69                                  | 94                               | > 19:1                           |
| 9 <sup>d</sup>  | DMAc              | 74                                  | 92                               | > 19:1                           |
| 10 <sup>d</sup> | NMP               | 67                                  | 67                               | > 19:1                           |
| 11 <sup>d</sup> | PhCl              | 87                                  | 92                               | > 19:1                           |

All the reactions were run on a 0.1 mmol scale in 0.2 mL solvents for 18 h. <sup>a</sup>Determined by <sup>1</sup>H NMR

using dibromomethane as an internal standard. <sup>b</sup>Determined by HPLC. <sup>c</sup>Determined by <sup>1</sup>H NMR.  
<sup>d</sup>Yield of the isolated product.

### Scheme S1. Substrate scope

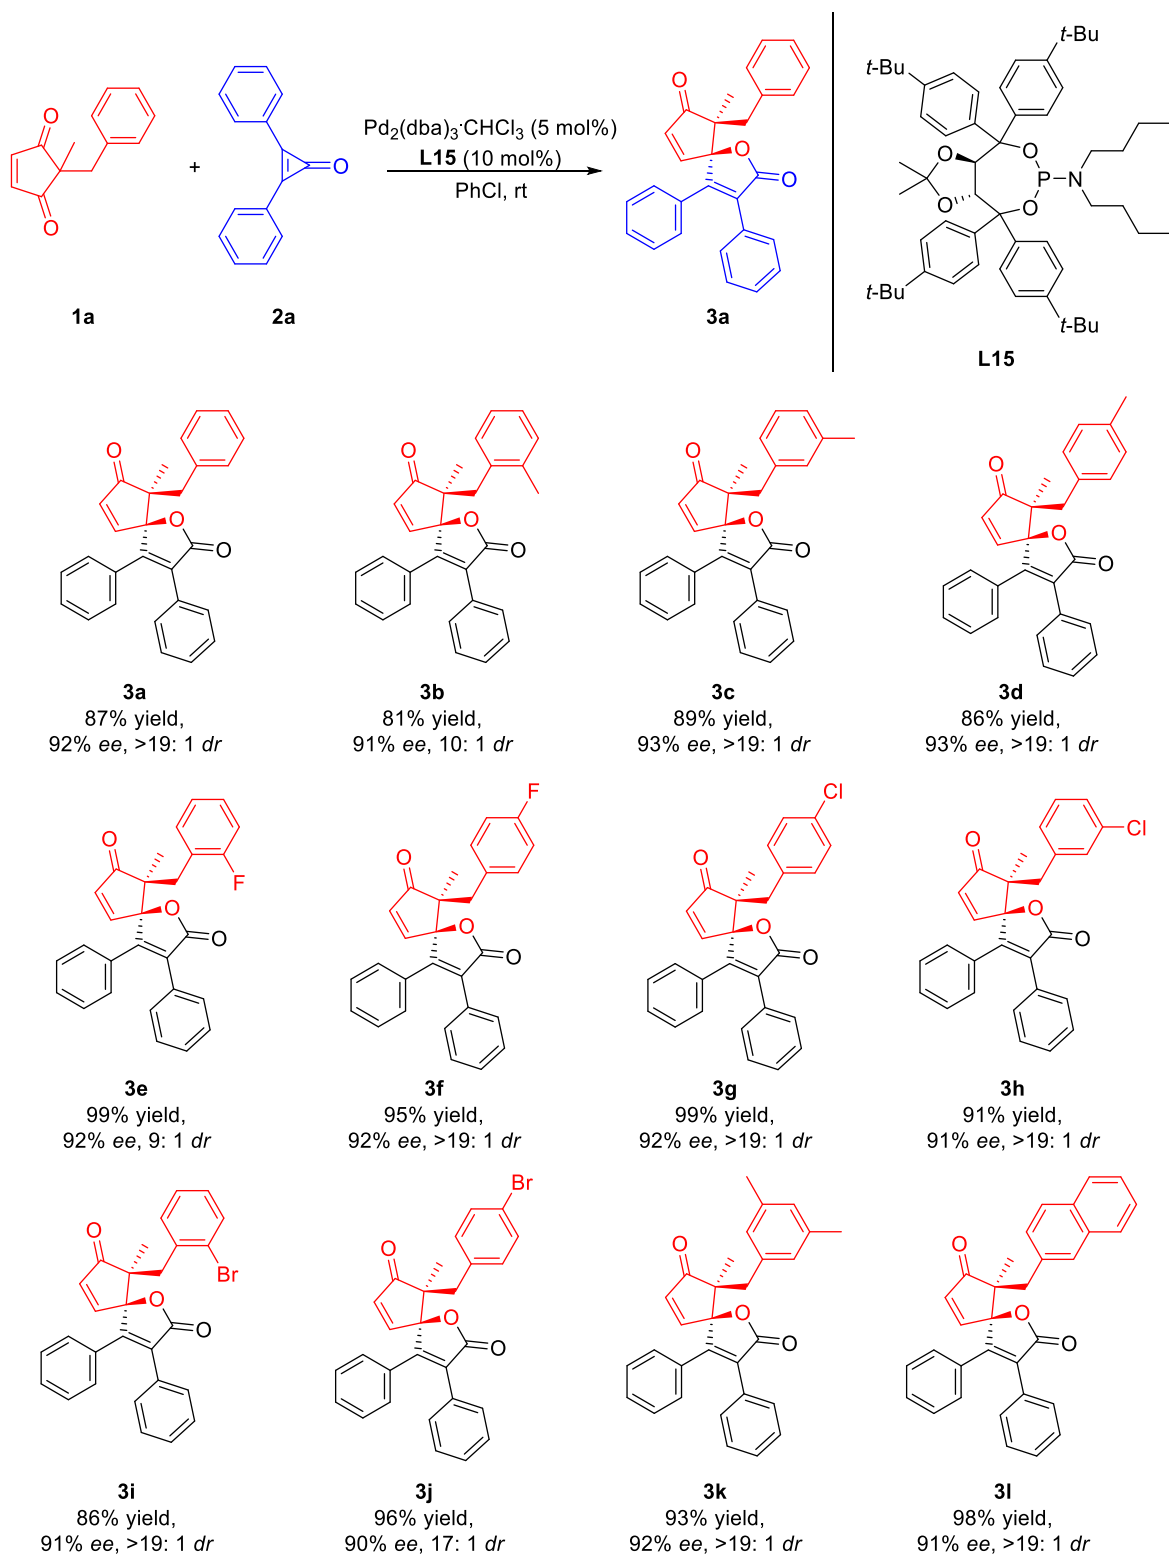

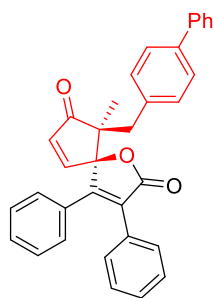

**3m**  
80% yield,  
93% ee, >19: 1 *dr*

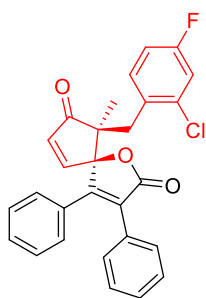

**3n**  
88% yield,  
88% ee, 4: 1 *dr*

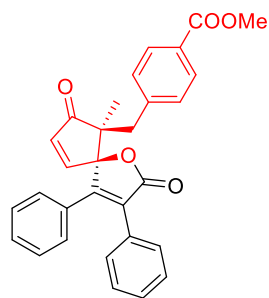

**3o**  
99% yield,  
92% ee, >19: 1 *dr*

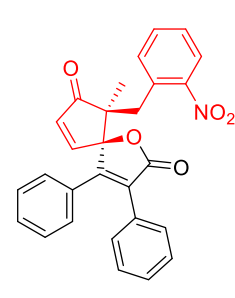

**3p**  
56% yield,  
92% ee, 6: 1 *dr*

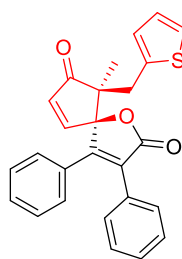

**3q**  
53% yield,  
92% ee, >19: 1 *dr*

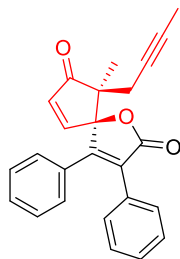

**3r**  
44% yield,  
94% ee, >19: 1 *dr*

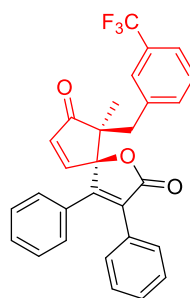

**3s**  
97% yield,  
92% ee, >19: 1 *dr*

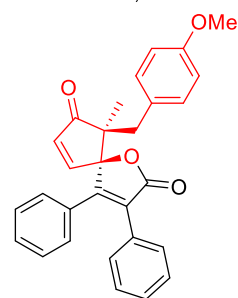

**3t**  
84% yield,  
93% ee, >19: 1 *dr*

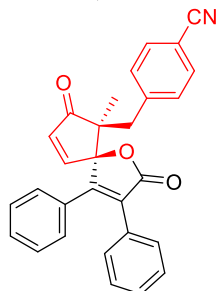

**3u**  
99% yield,  
91% ee, 17: 1 *dr*

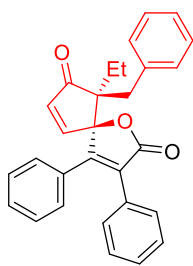

**3v<sup>a</sup>**  
32% yield,  
72% ee, 2: 1 *dr*

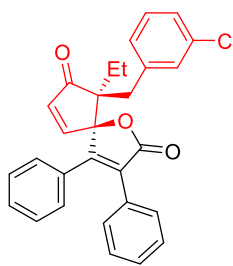

**3w<sup>a</sup>**  
34% yield,  
67% ee, 3: 1 *dr*

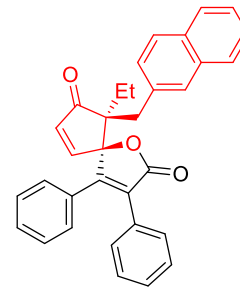

**3x<sup>a</sup>**  
58% yield,  
84% ee, 2: 1 *dr*

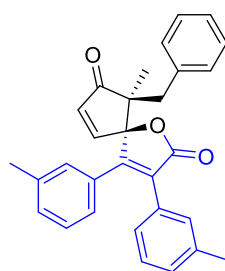

**3y**  
99% yield,  
95% ee, 17: 1 *dr*

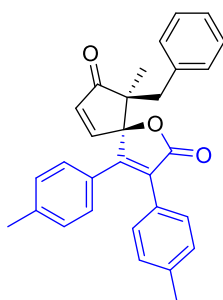

**3z**  
42% yield,  
85% ee, >19: 1 *dr*

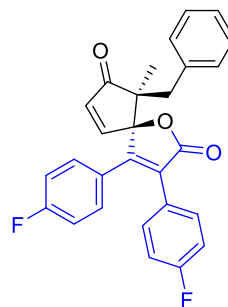

**3aa**  
63% yield,  
84% ee, >19: 1 *dr*

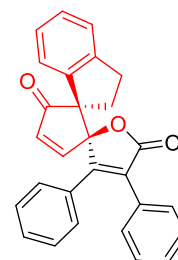

**3ab**  
94% yield,  
83% ee, 3: 1 *dr*

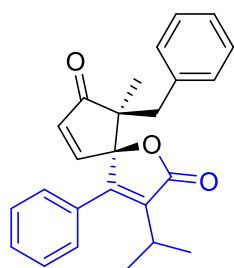

**3ac**  
57% yield,  
86% ee, >19: 1 *dr*

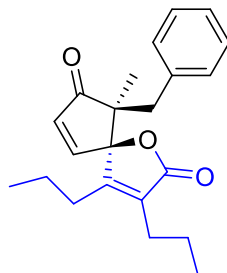

**3ad**  
55% yield,  
65% ee, >19: 1 *dr*

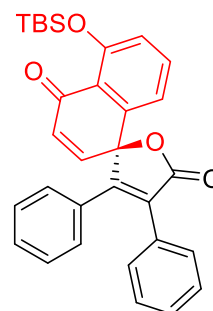

**5**  
86% yield,  
92% ee, 4: 1 *rr*

<sup>a</sup>The reaction temperature is 50 °C.

#### 4. Transformation of Products.

##### Gram reaction

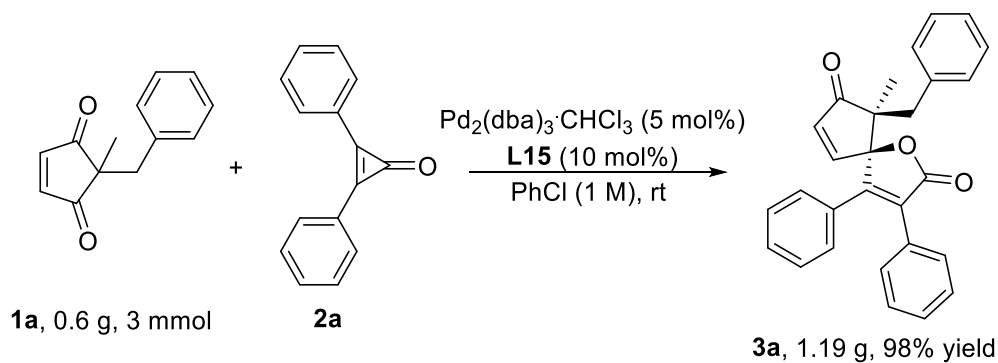

A vial was charged with 1,3-diones **1a** (0.6g, 3 mmol), cyclopropanone **2a** (1.24g, 0.4 mmol),  $\text{Pd}_2(\text{dba})_3 \cdot \text{CHCl}_3$  (155mg, 5 mol%), (*R,R*)-**L15** (255mg, 10 mol%) and evacuated under high vacuum and backfilled with  $\text{N}_2$ .  $\text{PhCl}$  (3 mL) was next added. The mixture was stirred at 25 °C for 18 hours. Upon reaction completion, the crude was purified by column chromatography to give the corresponding product and was analyzed with  $^1\text{H}$  NMR to determine the corresponding product ratio and recovered.

### Procedure for the synthesis of **6**.

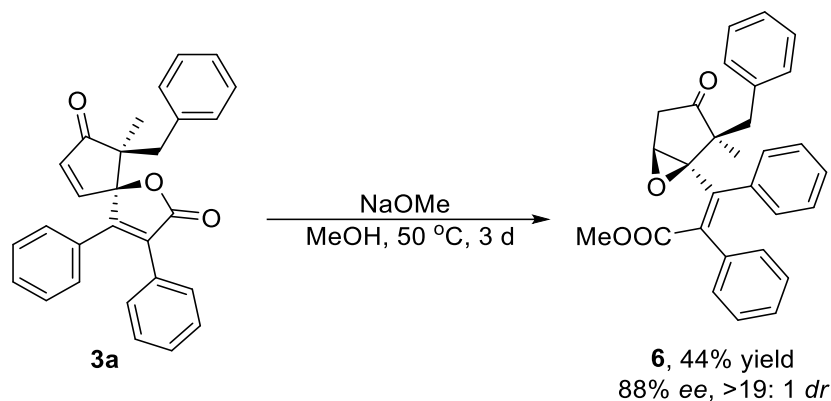

Prepared according to a previous reported method using **3a** (0.1mmol, 1.0 equiv), NaOMe (0.1mmol, 1.0 equiv) and 0.5mL of Methanol. The mixture was stirred at 50 °C for 3 days. After the reaction completed, the reaction solution was evaporated under reduced pressure and was the purified by silica gel column chromatography to afford **6**.

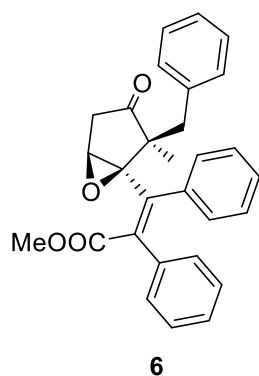

### **Methyl (Z)-3-((1R,2S,5S)-2-benzyl-2-methyl-3-oxo-6-oxabicyclo [3.1.0] hexan-1-yl)-2,3-diphenylacrylate (6):**

Yellow oil (19.2 mg, 44% yield), purified by column chromatography (SiO<sub>2</sub>, PE/EA= 4:1).  $[\alpha]_D^{25} = 63.9$  (c = 0.77, CHCl<sub>3</sub>). <sup>1</sup>H NMR (400 MHz, CDCl<sub>3</sub>)  $\delta$  7.18 - 7.11 (m, 9H), 7.11 - 7.02 (m, 4H), 6.18 (d, *J* = 7.6 Hz, 2H), 4.67 (m, 1H), 3.45 (s, 3H), 3.11 (d, *J* = 14.0 Hz, 1H), 2.97 - 2.83 (m, 2H), 2.71 (m, 1H), 0.64 (s, 3H). <sup>13</sup>C NMR (100 MHz, CDCl<sub>3</sub>)  $\delta$  212.7, 170.9, 157.7, 136.2, 133.2, 131.9, 131.8, 129.3, 129.3, 128.9, 128.8, 128.6, 128.2, 128.1, 127.8, 126.9, 95.4, 77.5, 77.4, 77.2, 76.8, 75.6, 58.5, 58.1, 39.5, 36.5, 29.8, 19.3. HRMS (ESI) *m/z*: [M+Na]<sup>+</sup> calculated for C<sub>29</sub>H<sub>26</sub>NaO<sub>4</sub>: 461.1723, found: 461.1748. The enantiomeric excess was determined by UPLC with Chiralpark

INA column (hexanes:2-propanol = 75:25, 1 mL/min, 211 nm, 88% *ee*, *d.r.* > 19:1); major enantiomer *tr* = 3.688 min, minor enantiomer *tr* = 4.003 min.

### Procedure for the synthesis of 7.

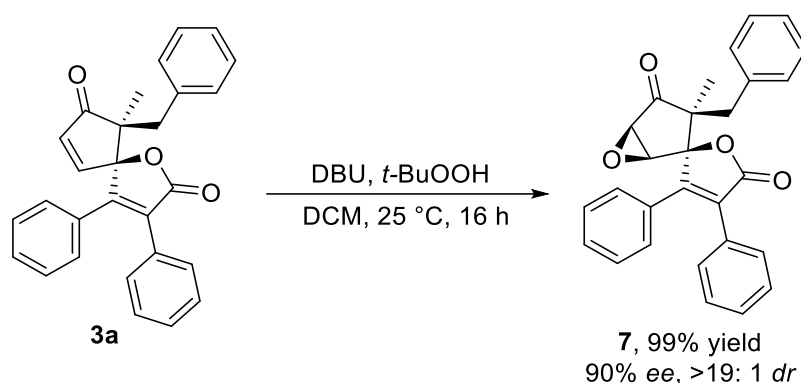

Prepared according to a previous reported method<sup>5</sup>, *t*-BuOOH (600  $\mu\text{L}$ ) was diluted with  $\text{H}_2\text{O}$  (3 mL) and extracted with DCM (5 mL), combined the organic layers. **3a** (0.1 mmol, 1 equiv) was dissolved in 0.5 mL of the obtained solution, followed by the addition of DBU (0.02 mmol, 0.2 equiv). The mixture was stirred at 25  $^\circ\text{C}$  for 16 hours. After the reaction completed, the reaction solution was evaporated under reduced pressure and was purified by silica gel column chromatography to afford **7**.

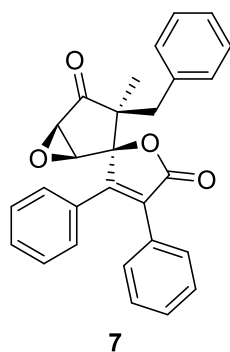

### (1*S*,2*R*,3*S*,5*R*)-3-benzyl-3-methyl-3',4'-diphenyl-5'*H*-6-oxaspiro[bicyclo[3.1.0]hexane-2,2'-furan]-4,5'-dione (**7**):

Yellow oil (41.8 mg, 99% yield), purified by column chromatography ( $\text{SiO}_2$ , PE/EA = 4:1).  $[\alpha]_D^{25} = 13.3$  ( $c = 0.80$ ,  $\text{CHCl}_3$ ).  $^1\text{H NMR}$  (400 MHz,  $\text{CDCl}_3$ )  $\delta$  7.25 - 7.21 (m, 5H), 7.21 - 7.11 (m, 6H), 7.08 - 7.01 (m, 2H), 7.01 - 6.94 (m, 2H), 4.24 (d,  $J = 2.4$  Hz, 1H), 3.78 (d,  $J = 2.4$  Hz, 1H), 3.71 (d,  $J = 13.2$  Hz, 1H), 2.69 (d,  $J = 13.6$  Hz, 1H), 0.77 (s,

3H).  $^{13}\text{C}$  NMR (100 MHz,  $\text{CDCl}_3$ )  $\delta$  205.0, 170.5, 159.0, 136.3, 131.4, 130.9, 130.8, 130.3, 129.8, 129.4, 129.4, 129.0, 128.8, 128.6, 128.1, 126.9, 91.2, 77.5, 77.4, 77.2, 76.8, 59.6, 57.4, 52.1, 44.0, 17.0. HRMS (ESI)  $m/z$ :  $[\text{M}+\text{Na}]^+$  calculated for  $\text{C}_{29}\text{H}_{26}\text{NaO}_4$ : 445.1410, found: 445.1430. The enantiomeric excess was determined by HPLC with Chiralpark OD column (hexanes:2-propanol = 75:25, 1 mL/min, 211 nm, 90% *ee*, *d.r.* > 19:1); major enantiomer  $t_r$  = 21.498 min, major enantiomer  $t_r$  = 18.207 min, minor enantiomer  $t_r$  = 16.351 min.

## 5. Supplementary Figures

**Figure S1. Comparison of  $^{31}\text{P}$  NMR of ligand and Pd/L7 complex in the reaction with 1a and 2a.**

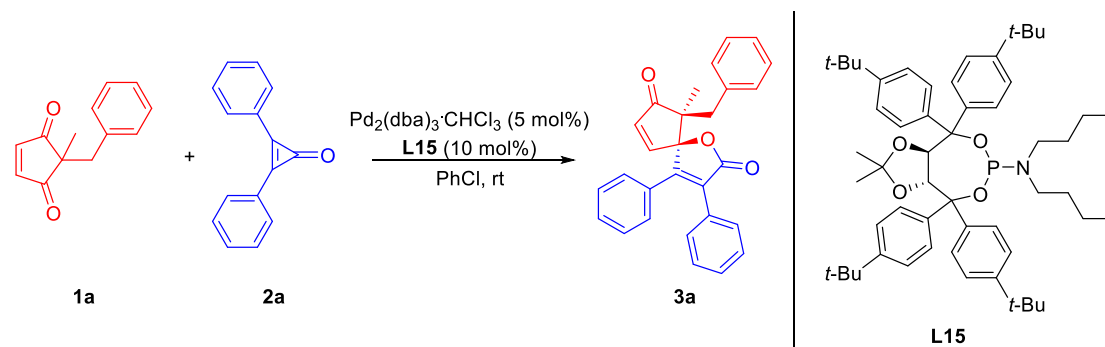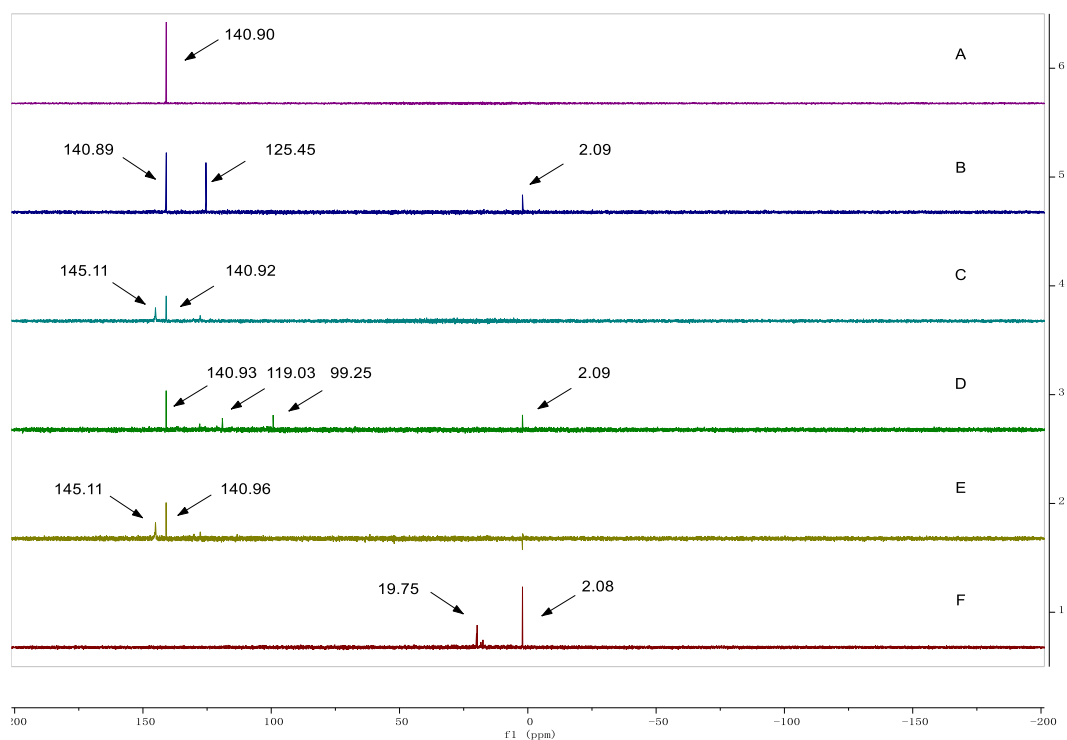

**A):** **L15** (0.02 mmol, 17.0 mg). **B):** **L15** (0.02 mmol, 17.0 mg) and Pd<sub>2</sub>(dba)<sub>3</sub>·CHCl<sub>3</sub> (0.01 mmol, 10.4 mg) were stirred for 30 mins. **C):** **L15** (0.02 mmol, 17.0 mg), Pd<sub>2</sub>(dba)<sub>3</sub>·CHCl<sub>3</sub> (0.01 mmol, 10.4 mg) and **1a** (0.2 mmol, 40.0 mg) were stirred for 30 mins. **D)** **L15** (0.02 mmol, 17.0 mg), Pd<sub>2</sub>(dba)<sub>3</sub>·CHCl<sub>3</sub> (0.01 mmol, 10.4 mg) and **2a** (0.4 mmol, 82.5 mg) were stirred for 30 mins. **E):** **L15** (0.02 mmol, 17.0 mg), Pd<sub>2</sub>(dba)<sub>3</sub>·CHCl<sub>3</sub> (0.01 mmol, 10.4 mg), **1a** (0.2 mmol, 40.0 mg) and **2a** (0.4 mmol, 82.5 mg) were stirred for 30 mins. **F):** **L15** (0.02 mmol, 17.0 mg), Pd<sub>2</sub>(dba)<sub>3</sub>·CHCl<sub>3</sub> (0.01 mmol, 10.4 mg), **1a** (0.2 mmol, 40.0 mg) and **2a** (0.4 mmol, 82.5 mg) were stirred for 24 hours.

**Figure S2. Proposed catalytic cycles for the model reaction system.**

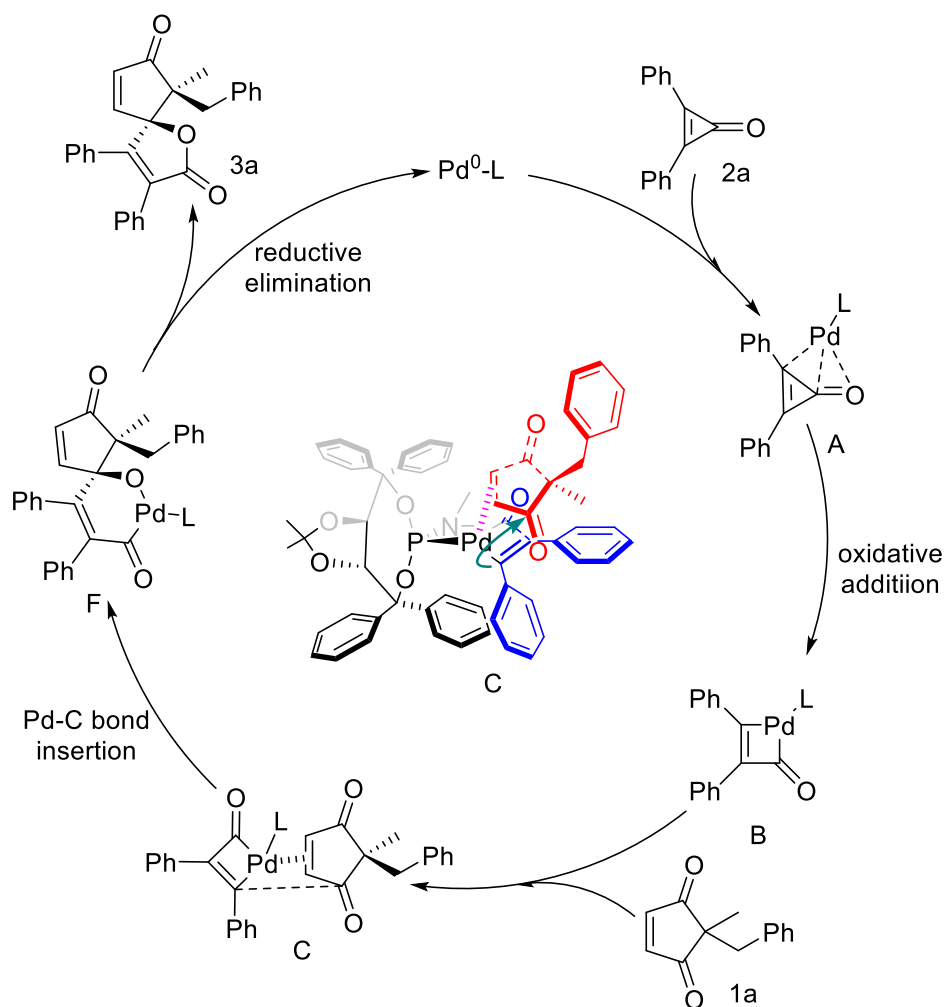



**Figure S3. Control Experiments**

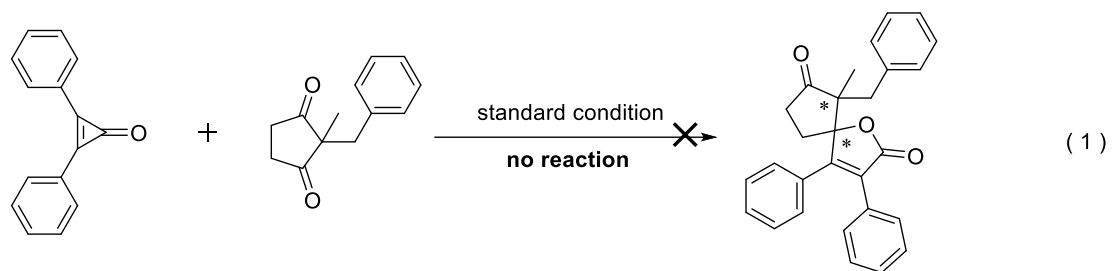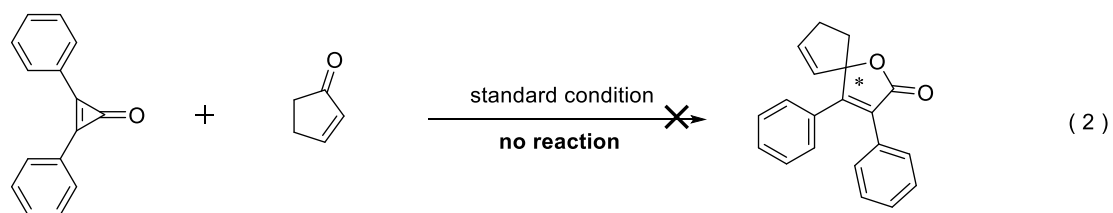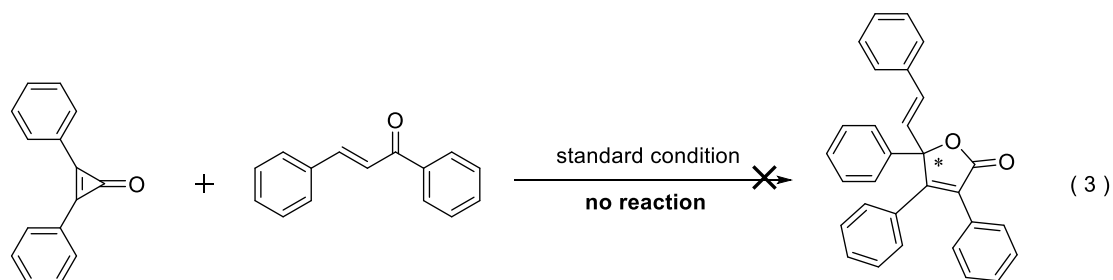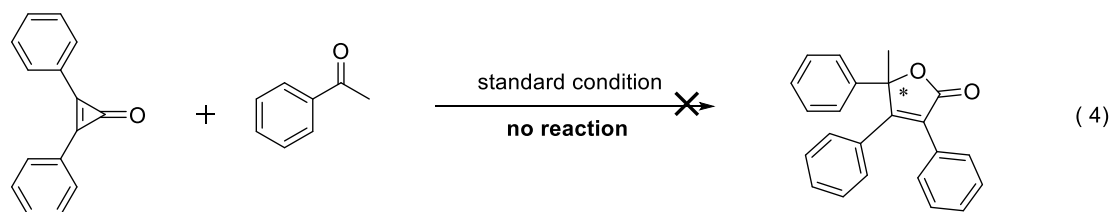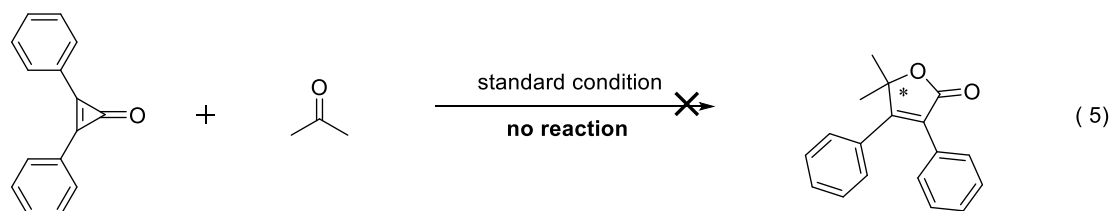

**Figure S4. NOESY spectrum of 4. The determination of the structure of product 4.**

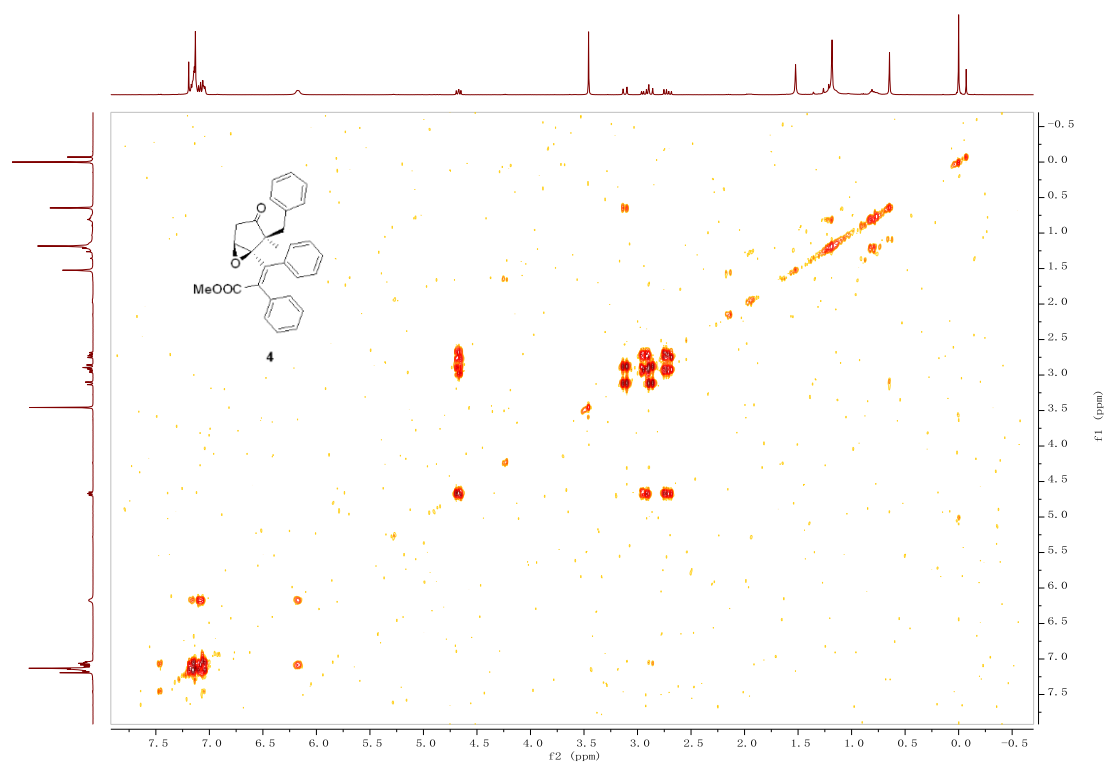

**Figure S5. NOESY spectrum of 5. The determination of the structure of product 5.**

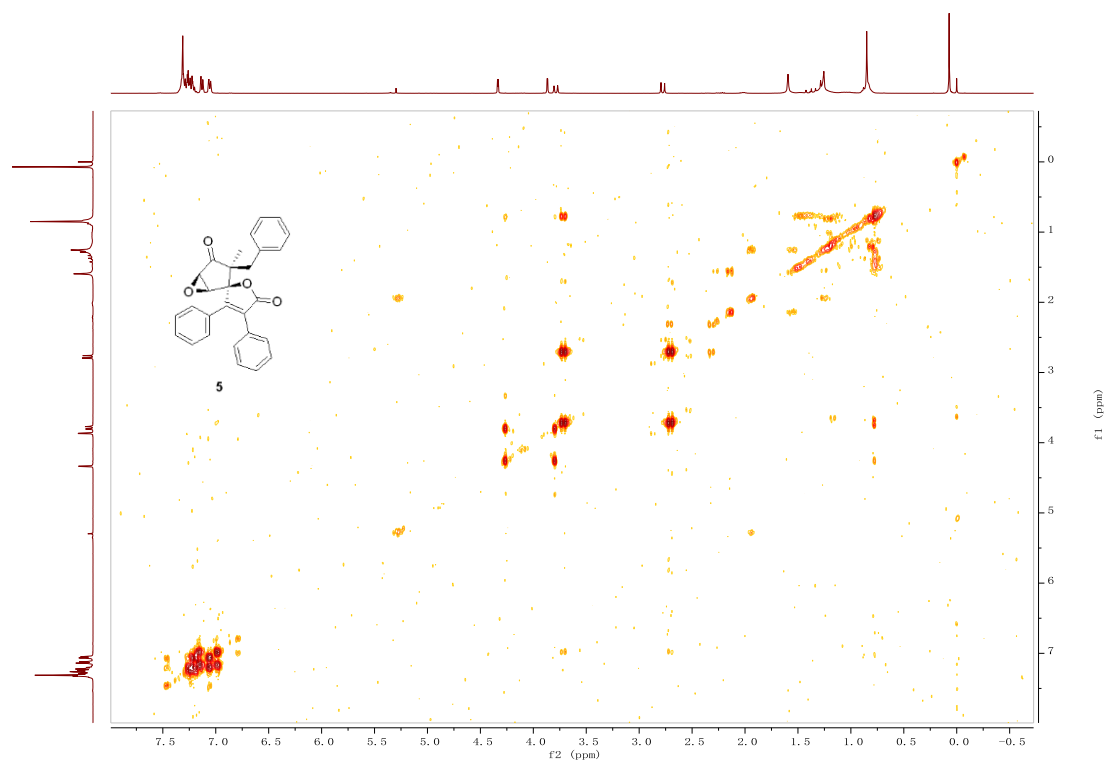

## 6. The confirmation of the absolute configuration of chiral product.

X-ray structures of **3a** (CCDC 2024499)

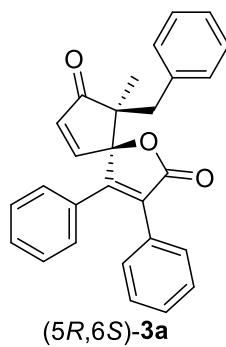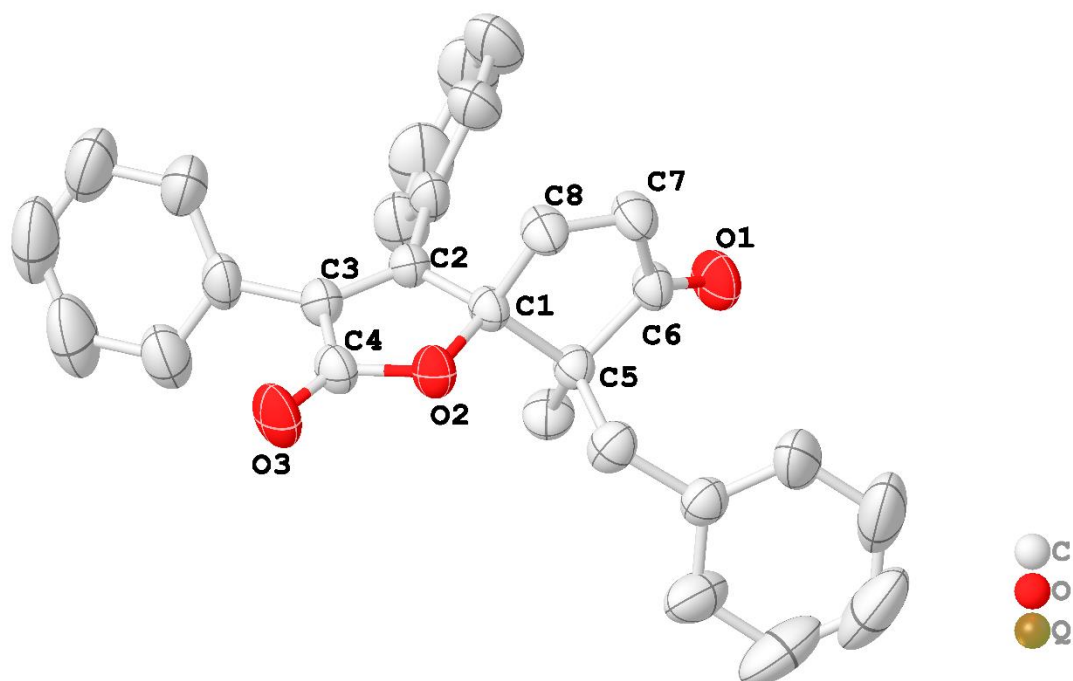

## 7. References

- 1 Dolbier, W. R.; Matsui, K.; McCullagh, L.; Anapolle, K. *J. Org. Chem.* **1979**, 40, 1979.
- 2 Gong, Q.; Wen, J.; Zhang, X. *Chem. Sci.* **2019**, 10, 6350-6353.
- 3 Das, T.; Saha, P.; Singh, V. K.; *Org. Lett.* **2015**, 17, 5088-5091.
- 4 Zhou, P.; Yang, W.T.; Rahman, A.U.; Li, G.; Jiang, B. *J. Org. Chem.* **2020**, 85, 360-366.
- 5 Al' mukhametov, A.Z.; Gimazetdinov, A.M.; Miftakhov, M.S. *Mendeleev. Commun.* **2018**, 28, 362-363.

## 8. $^1\text{H}$ NMR, $^{13}\text{C}$ NMR and $^{19}\text{F}$ NMR Spectra

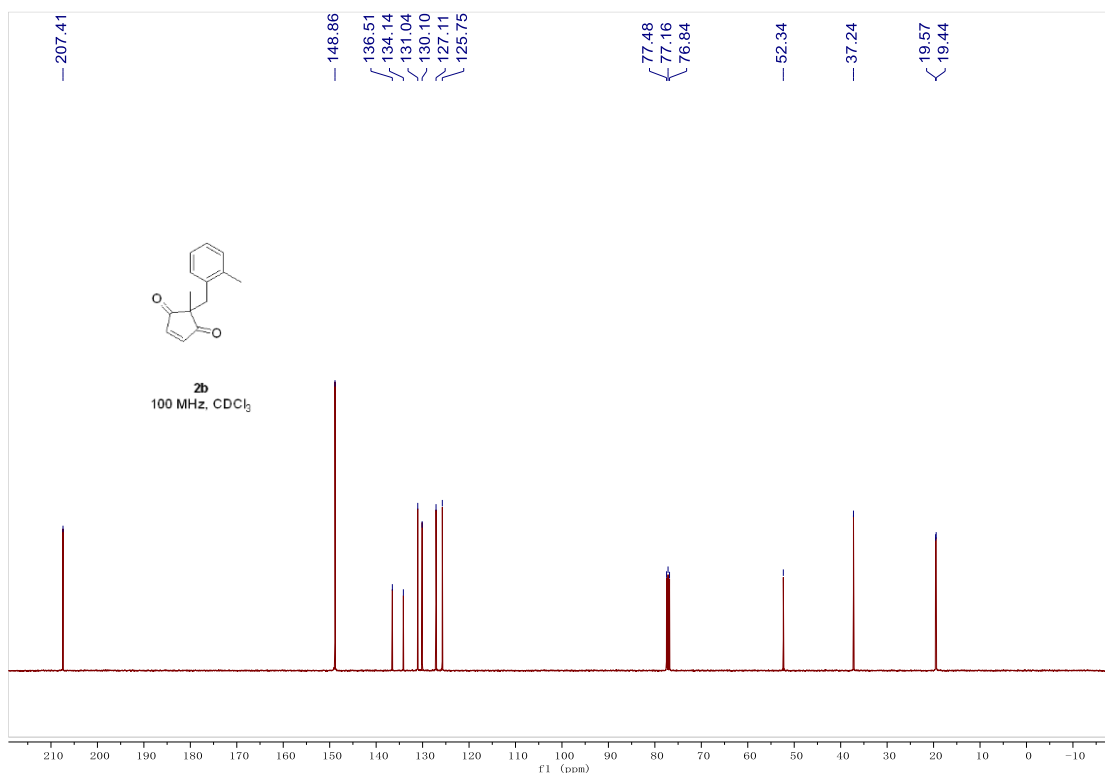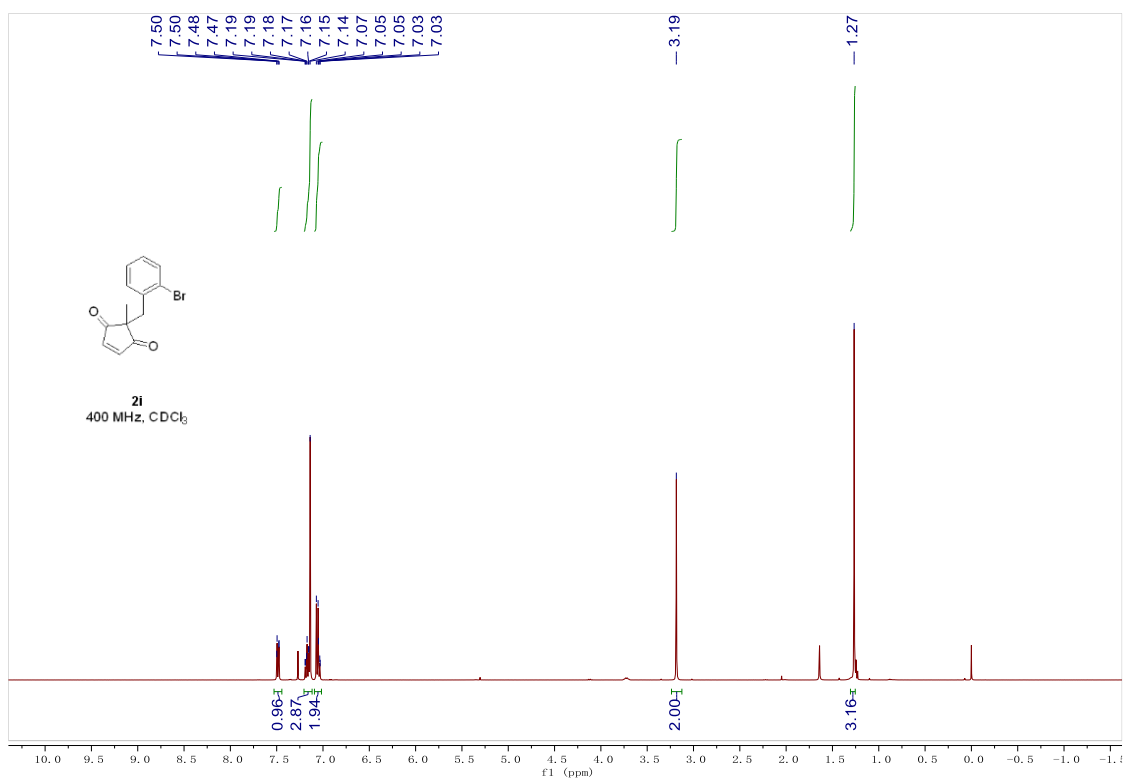

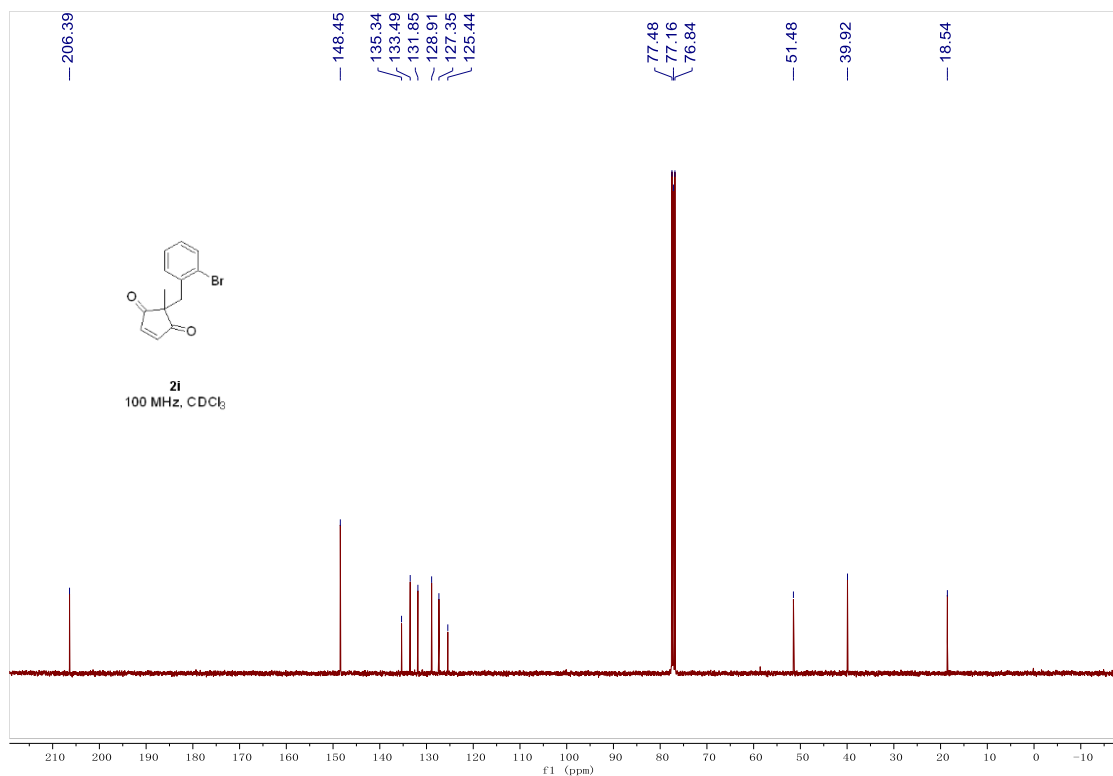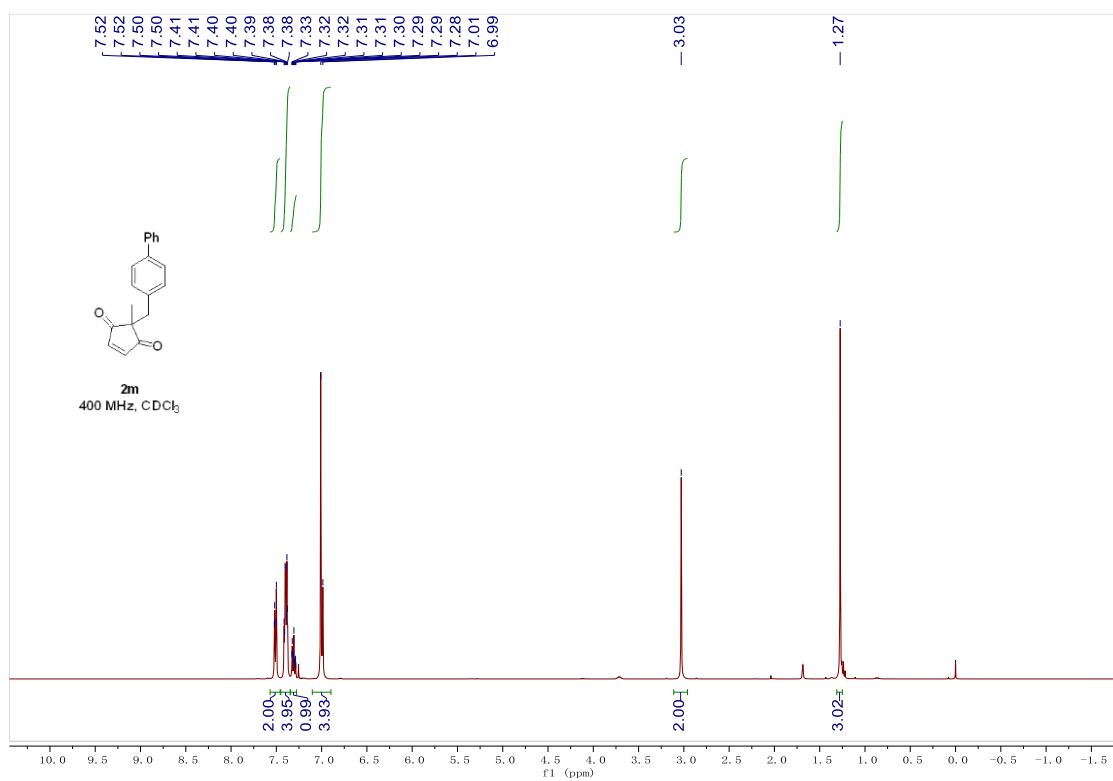

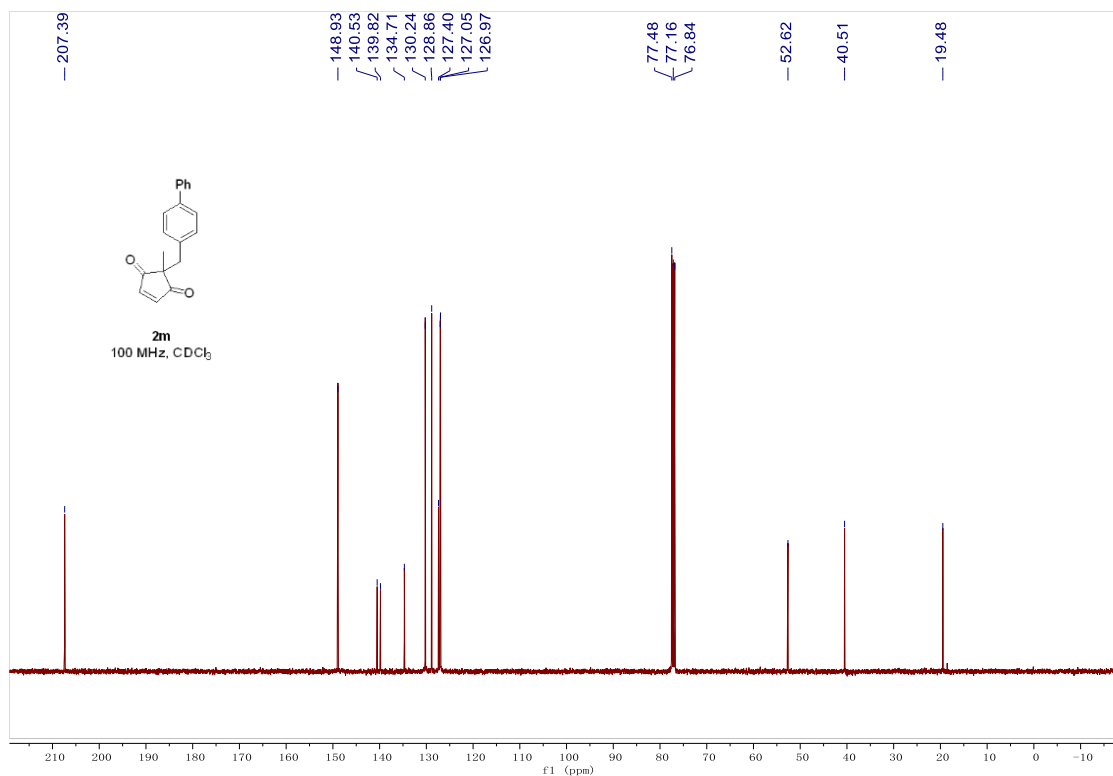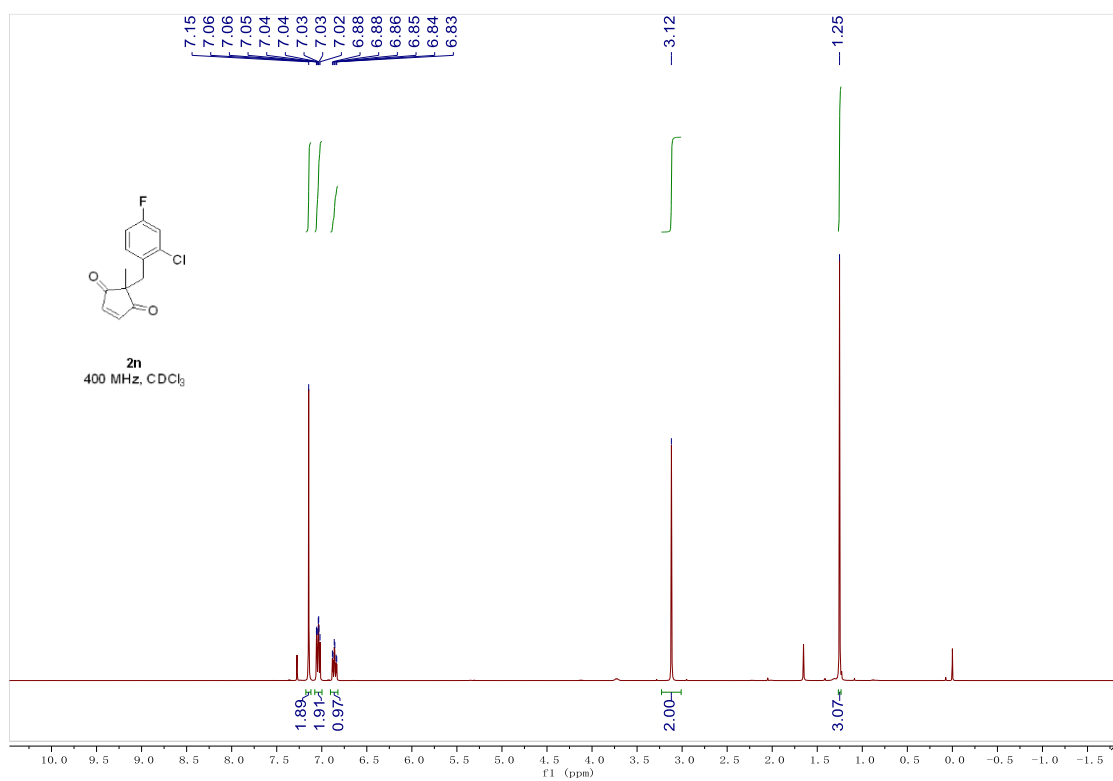

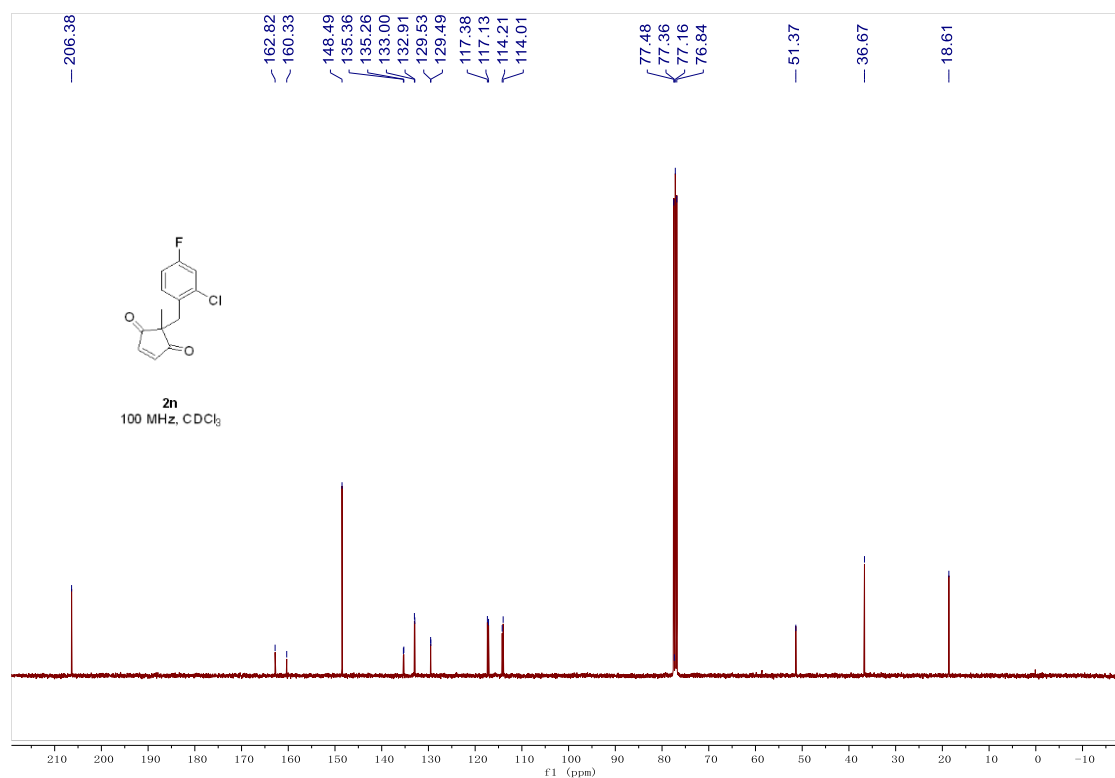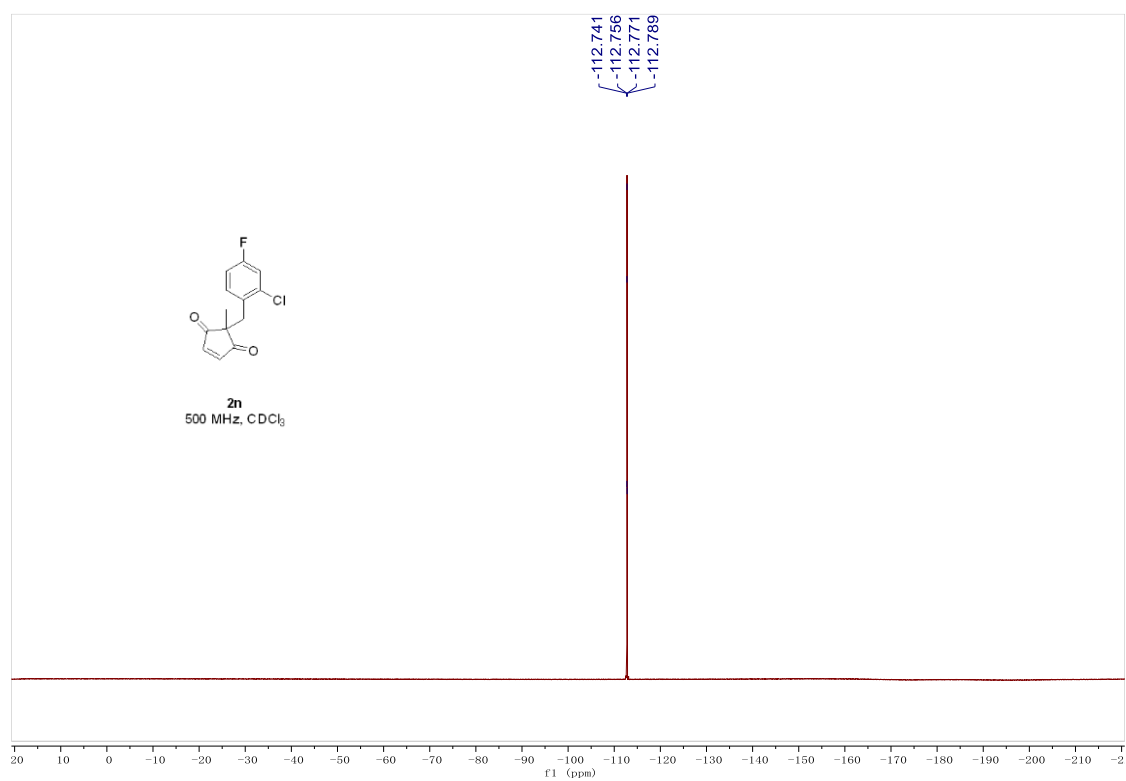



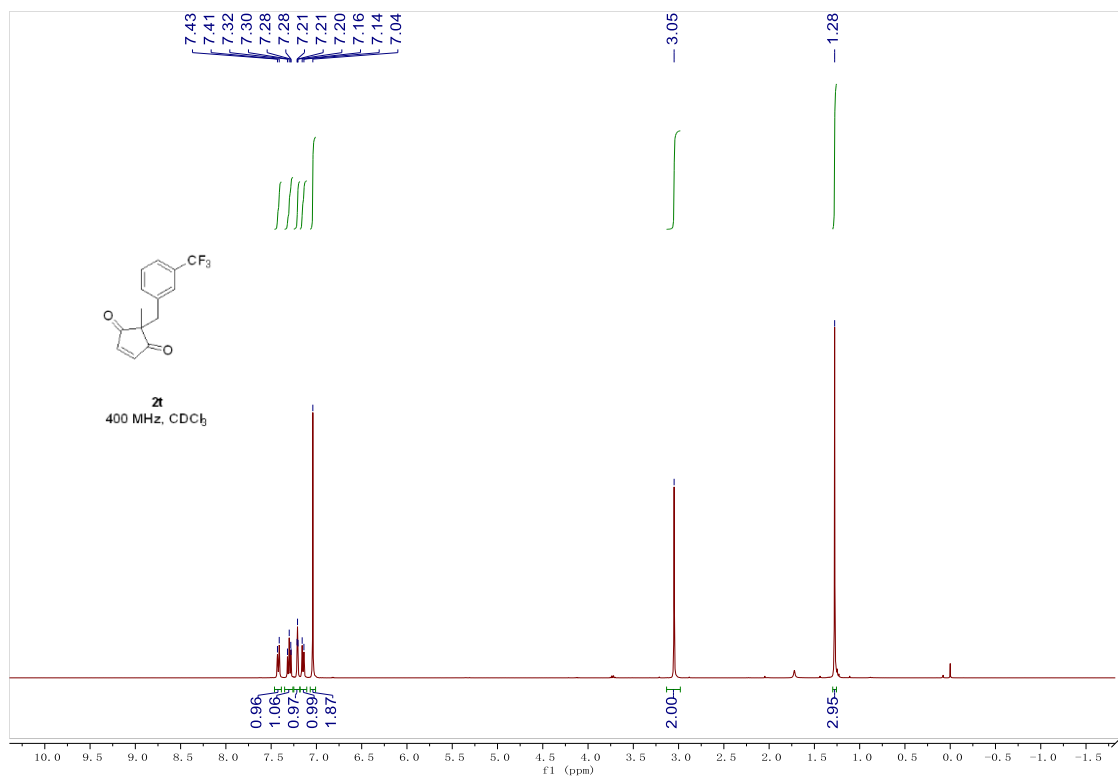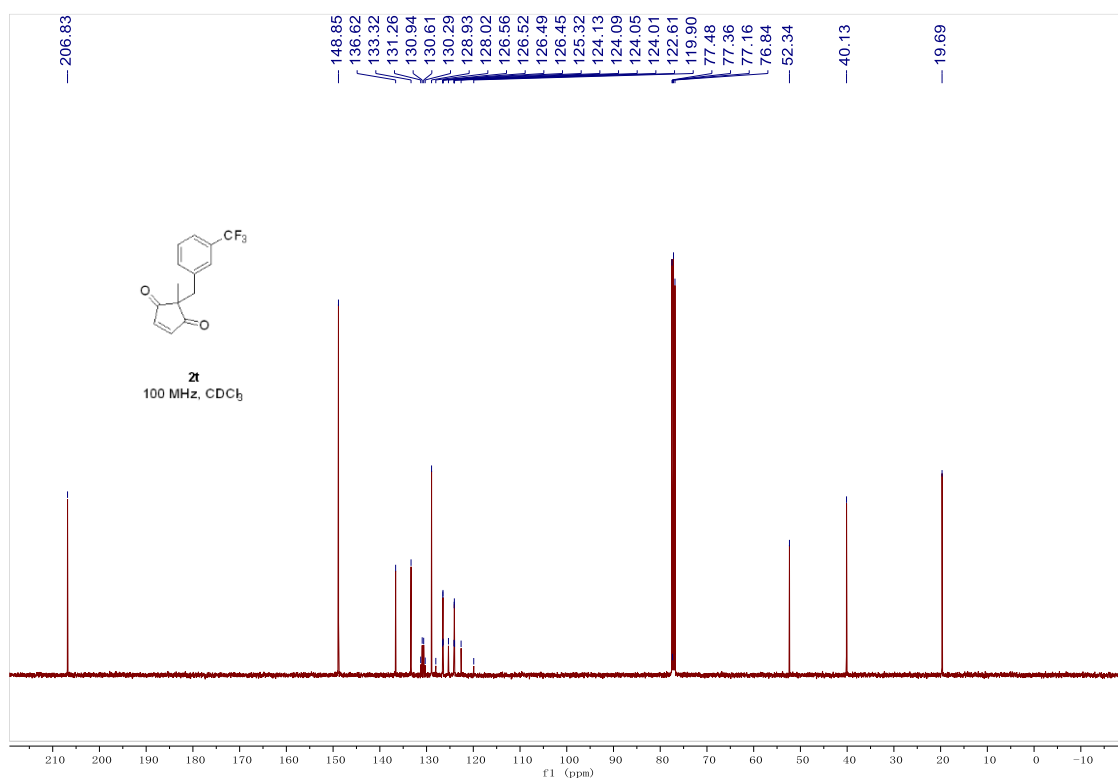

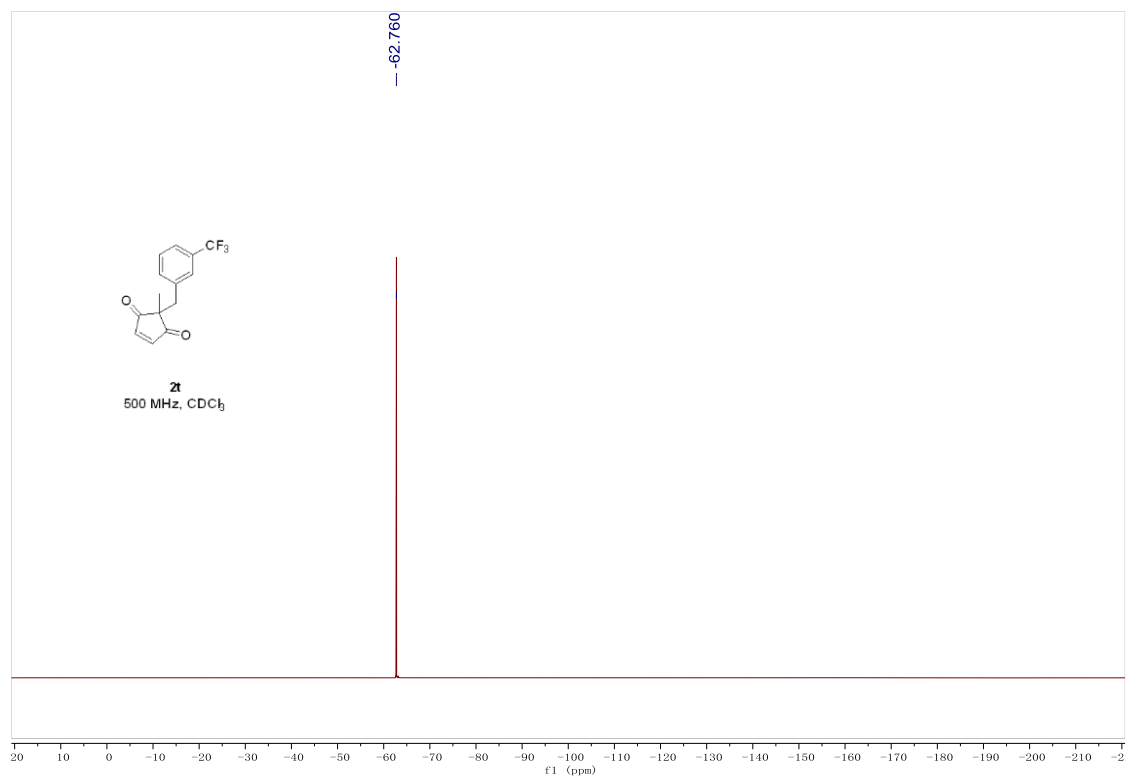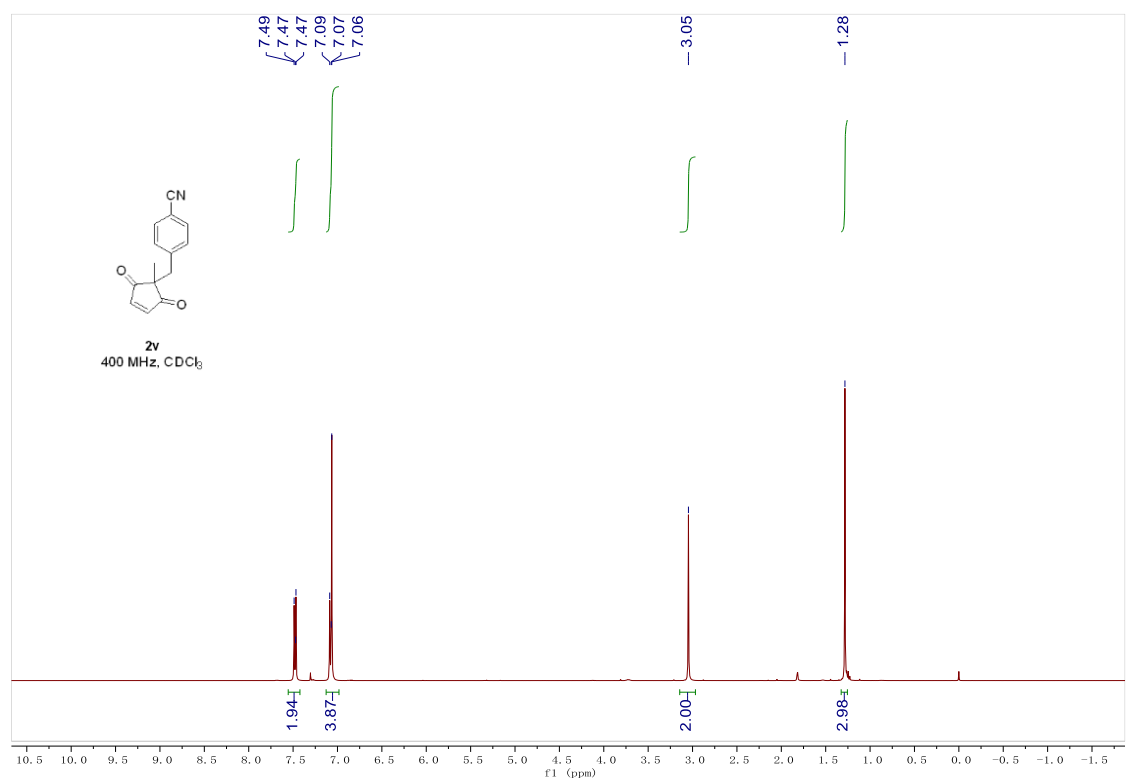

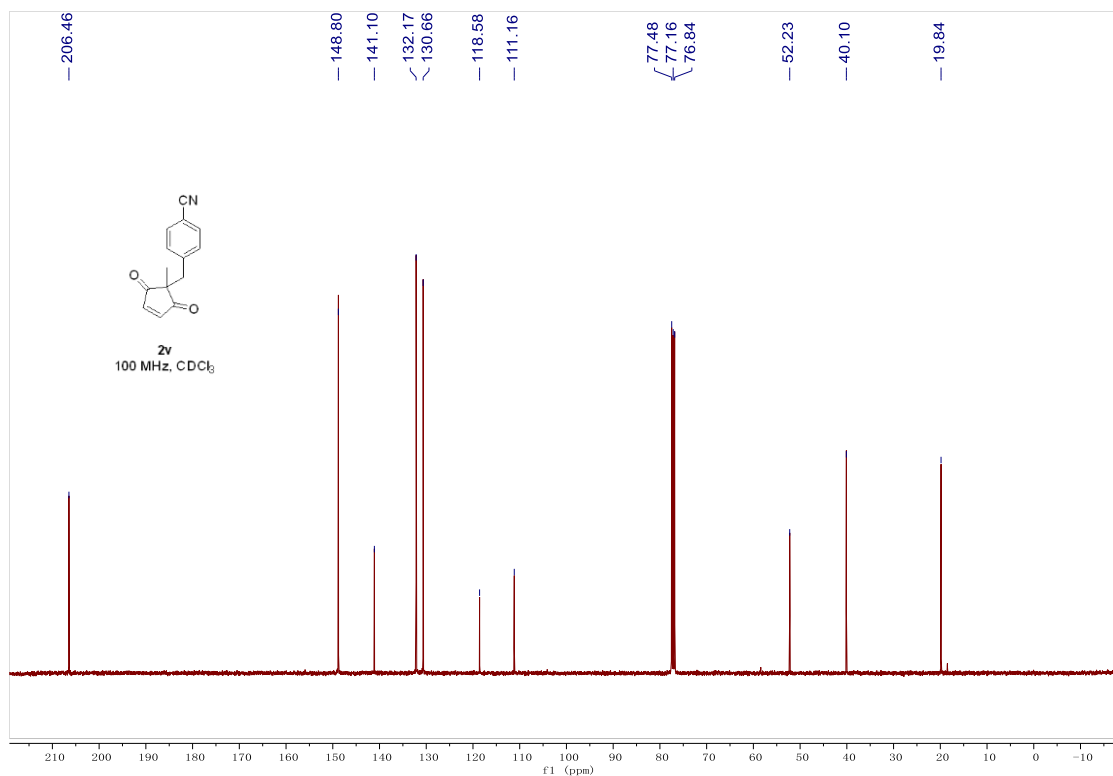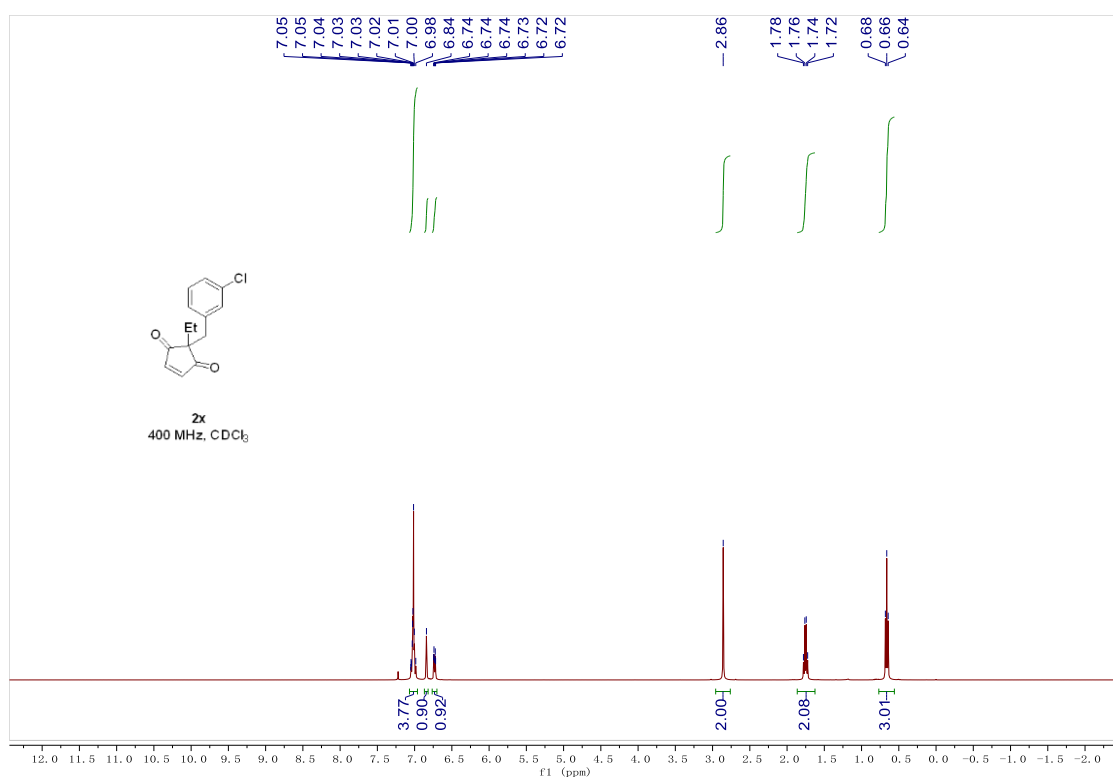

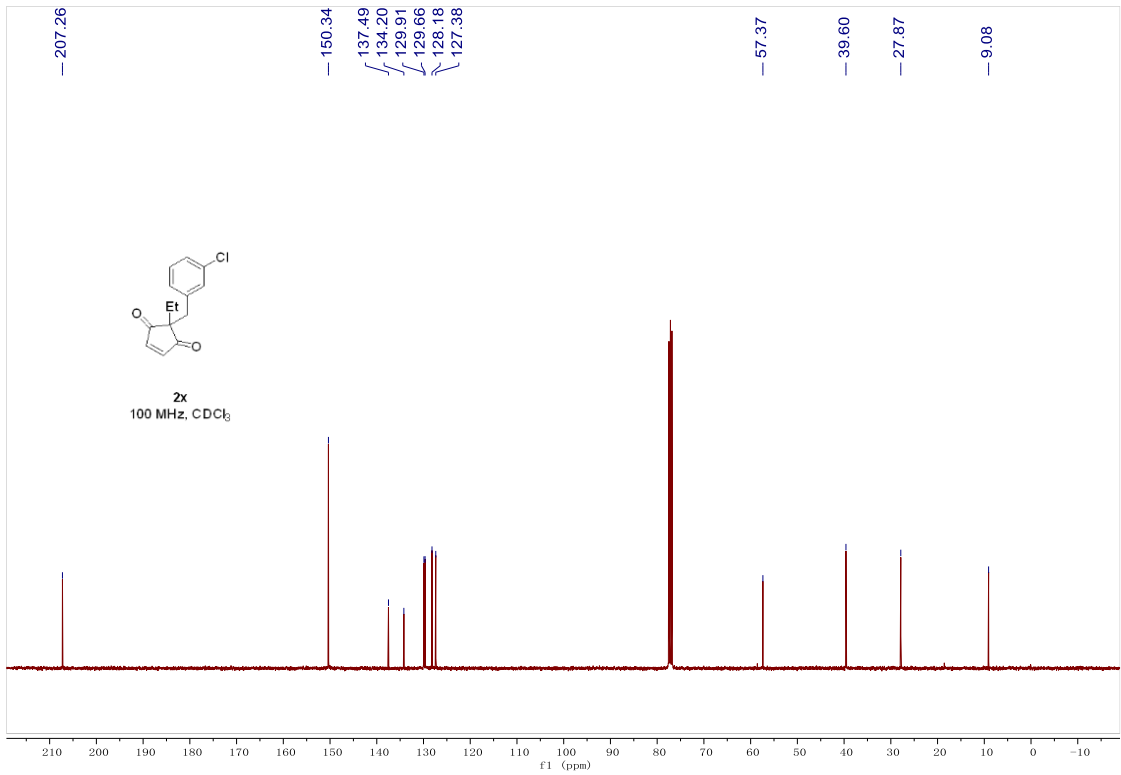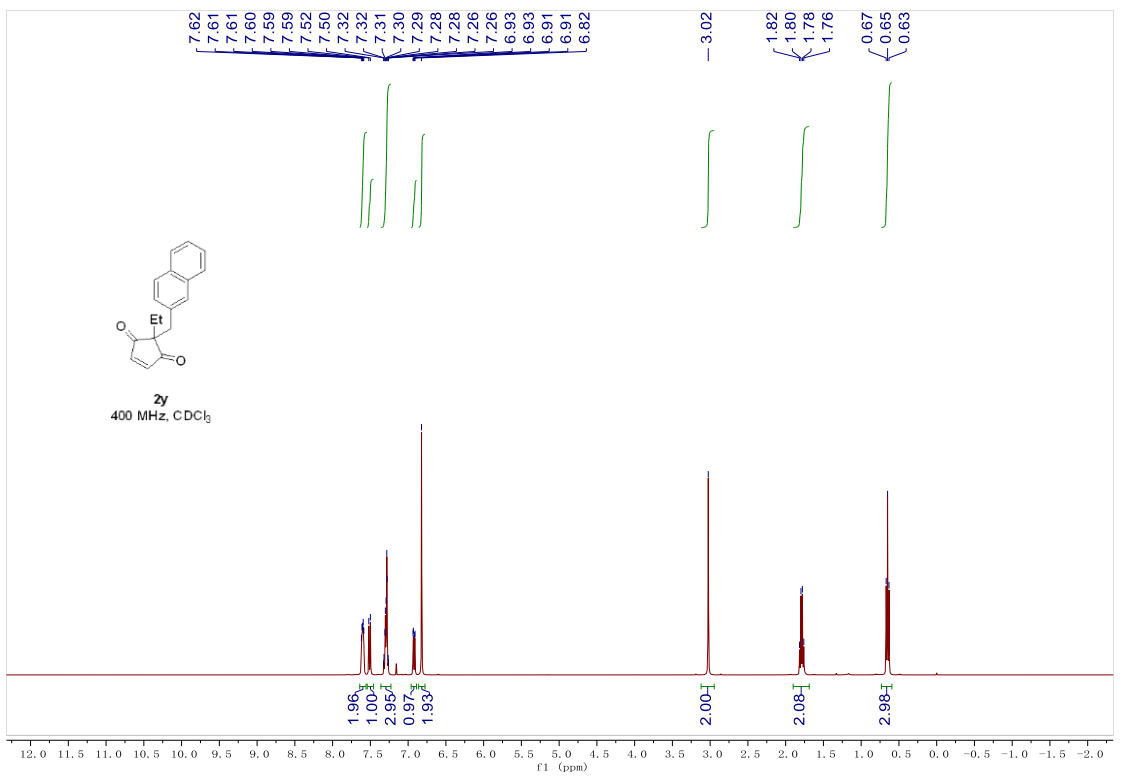

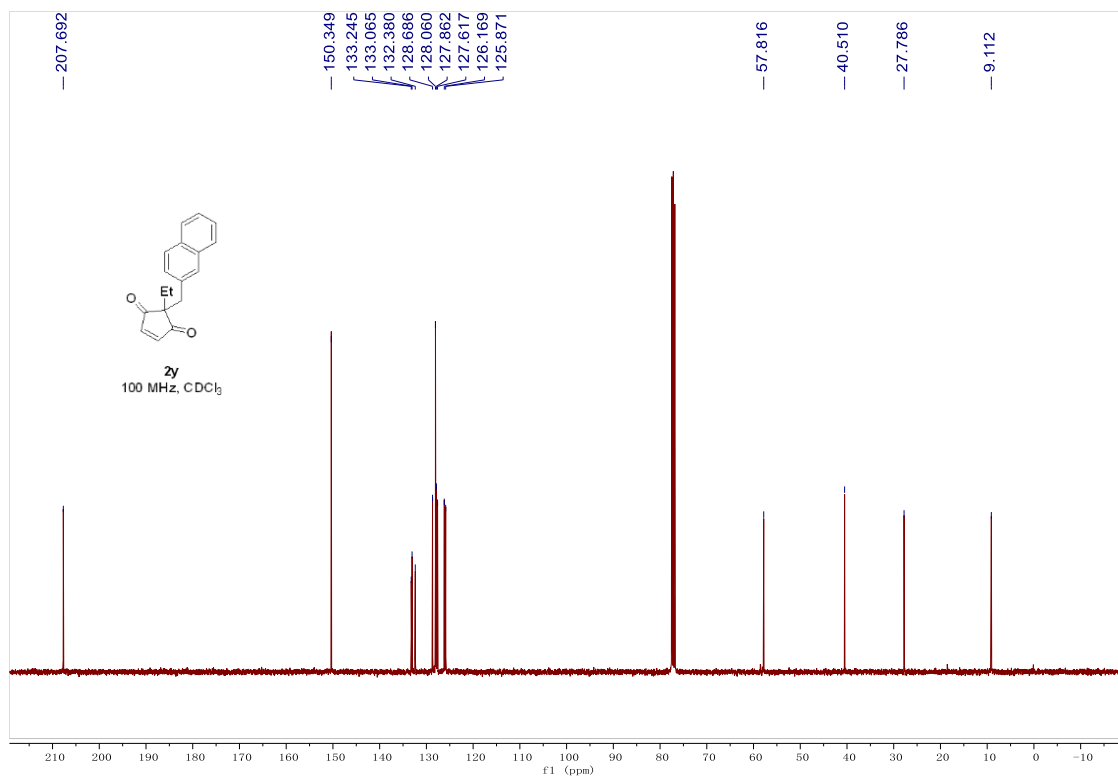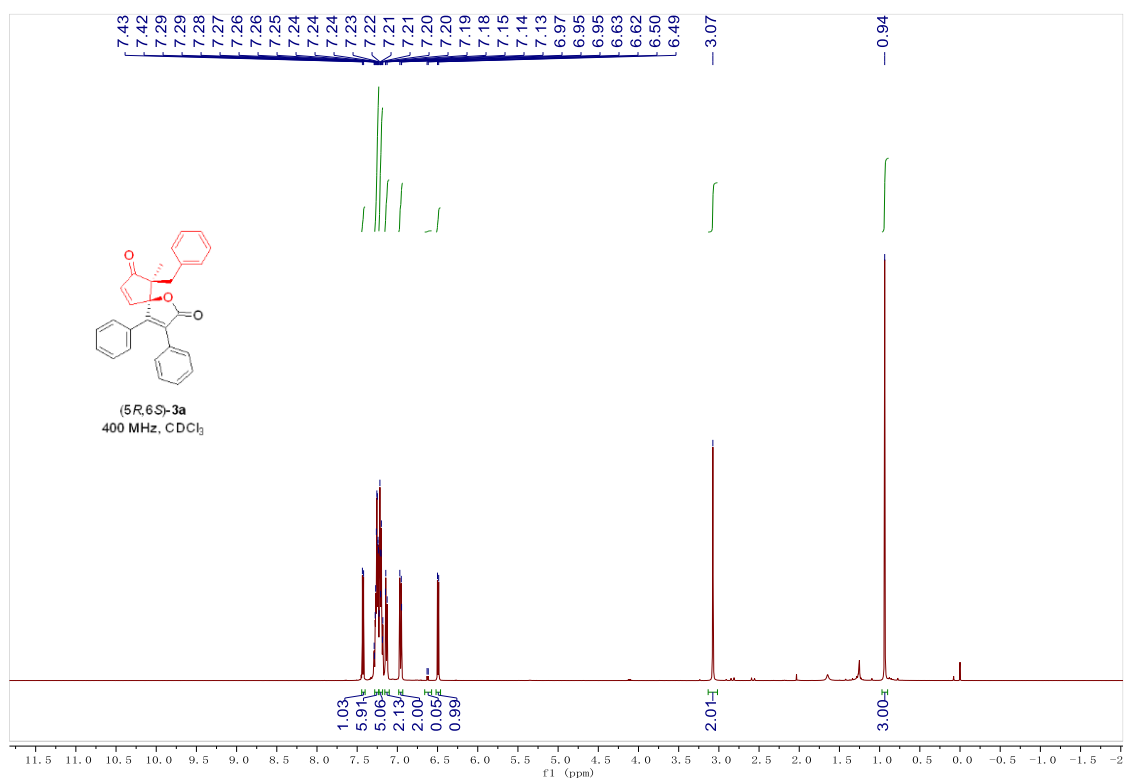

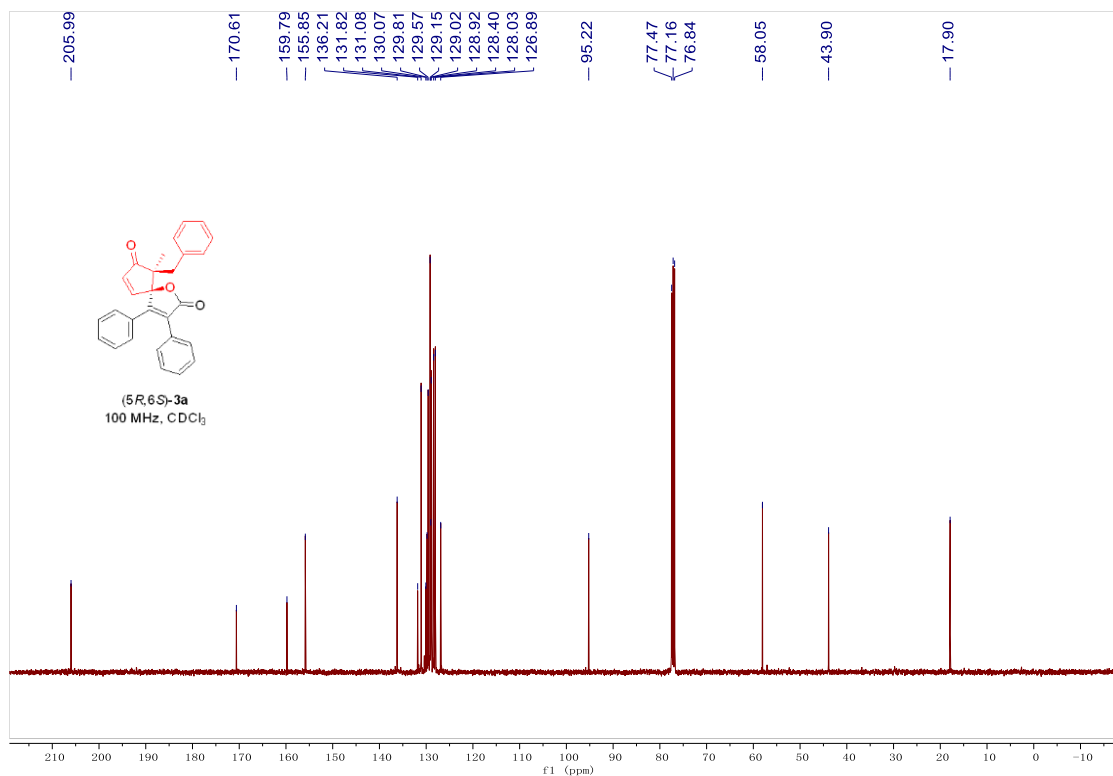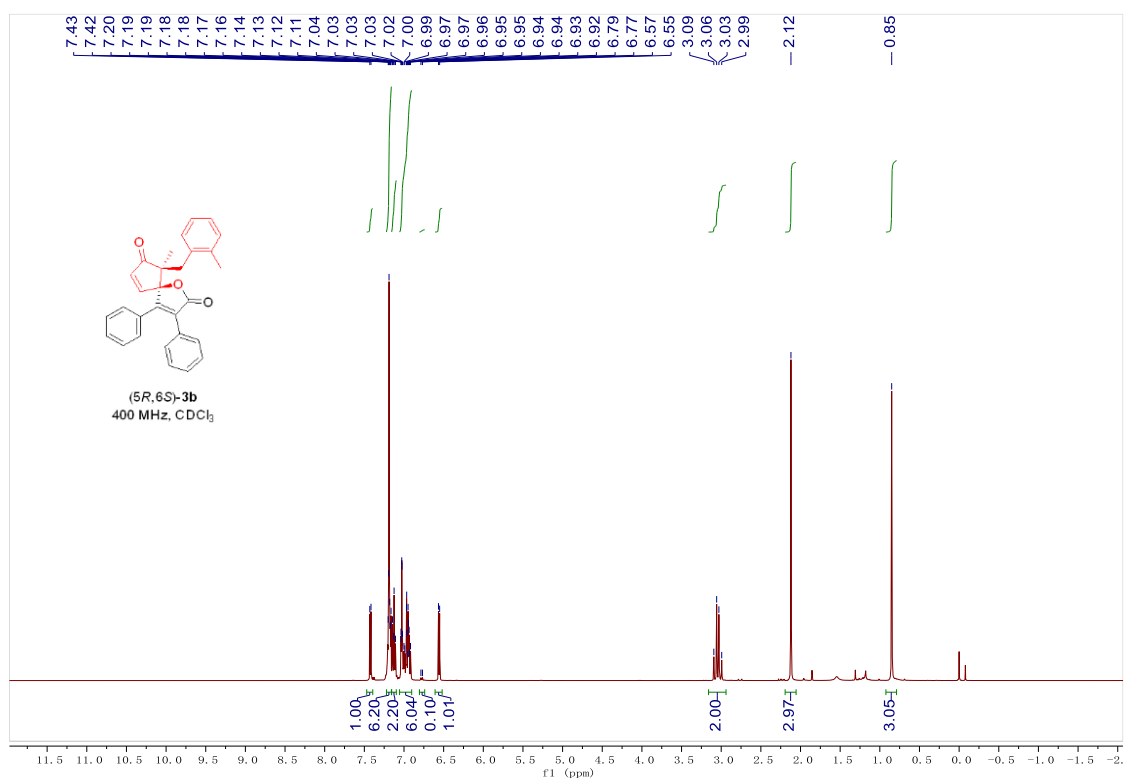

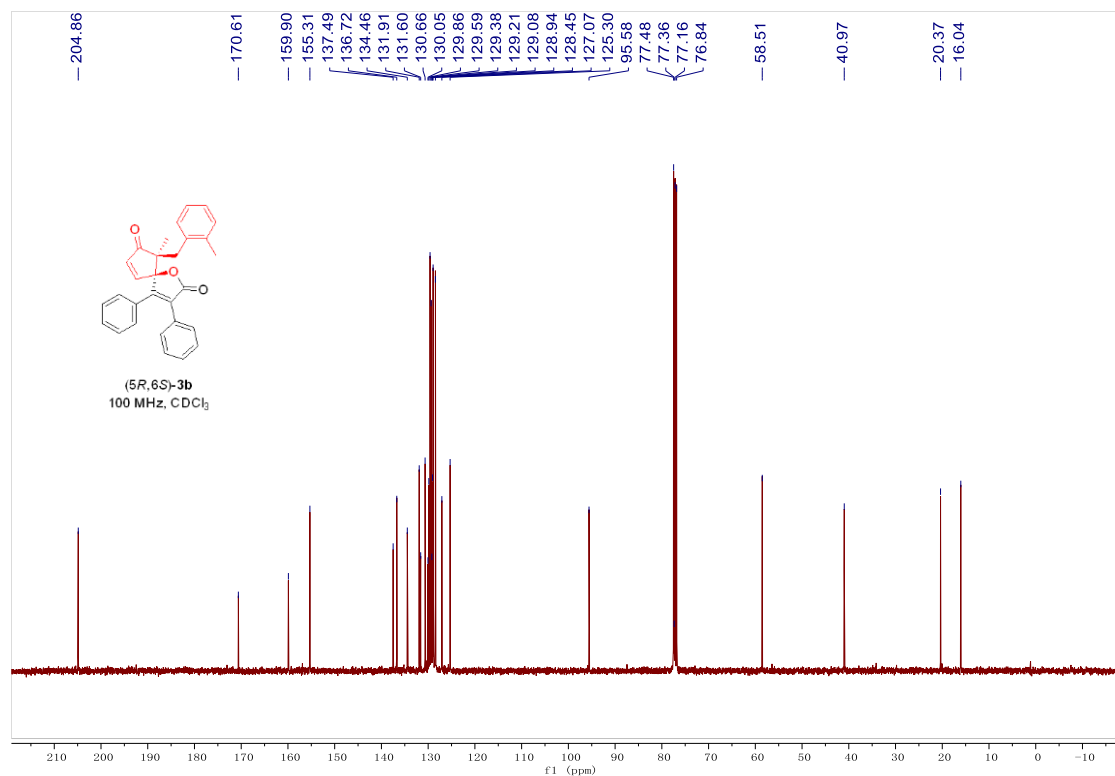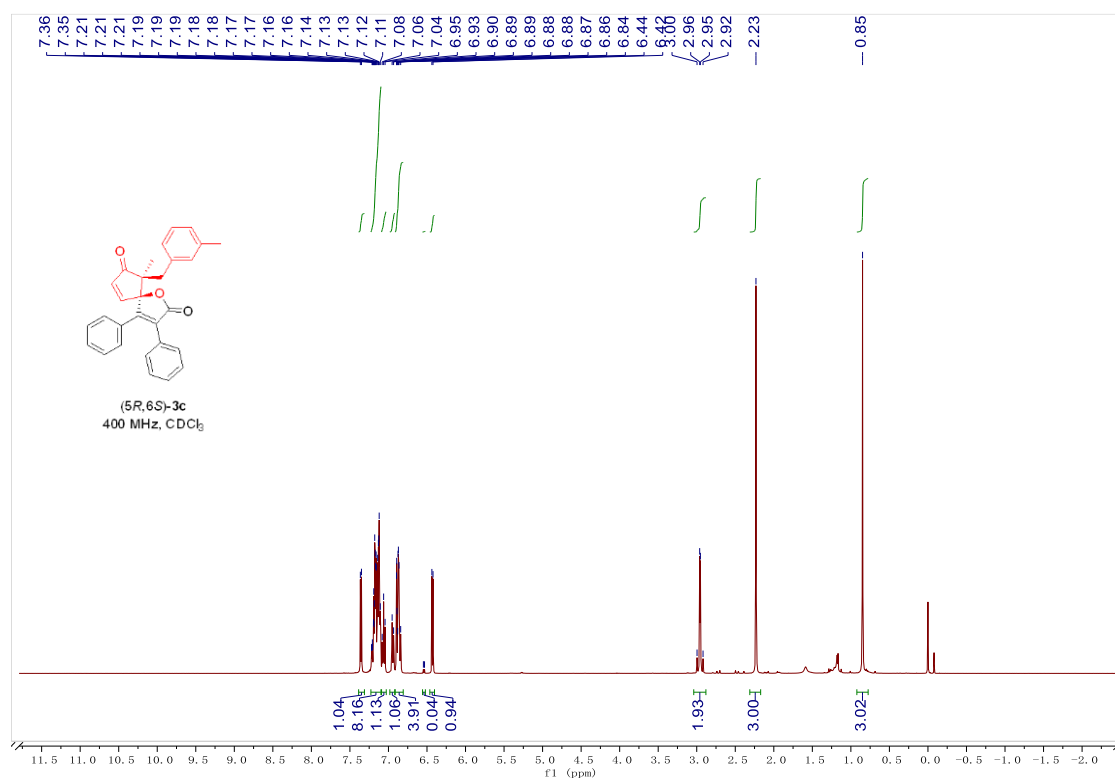

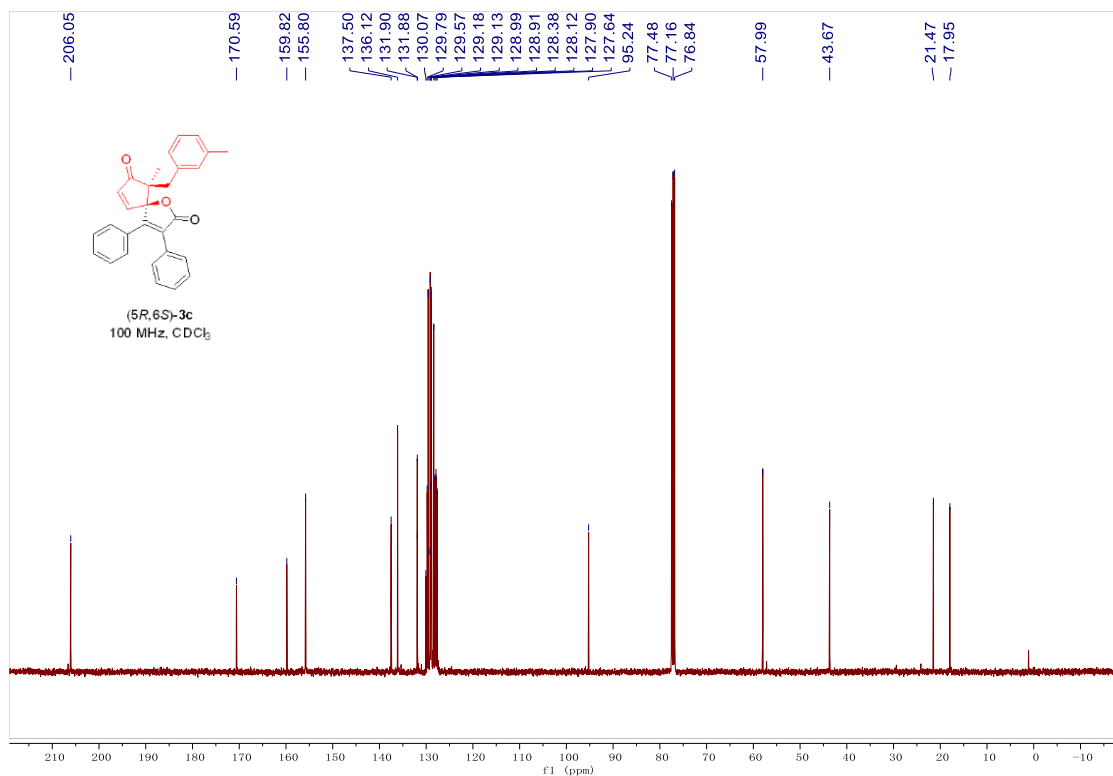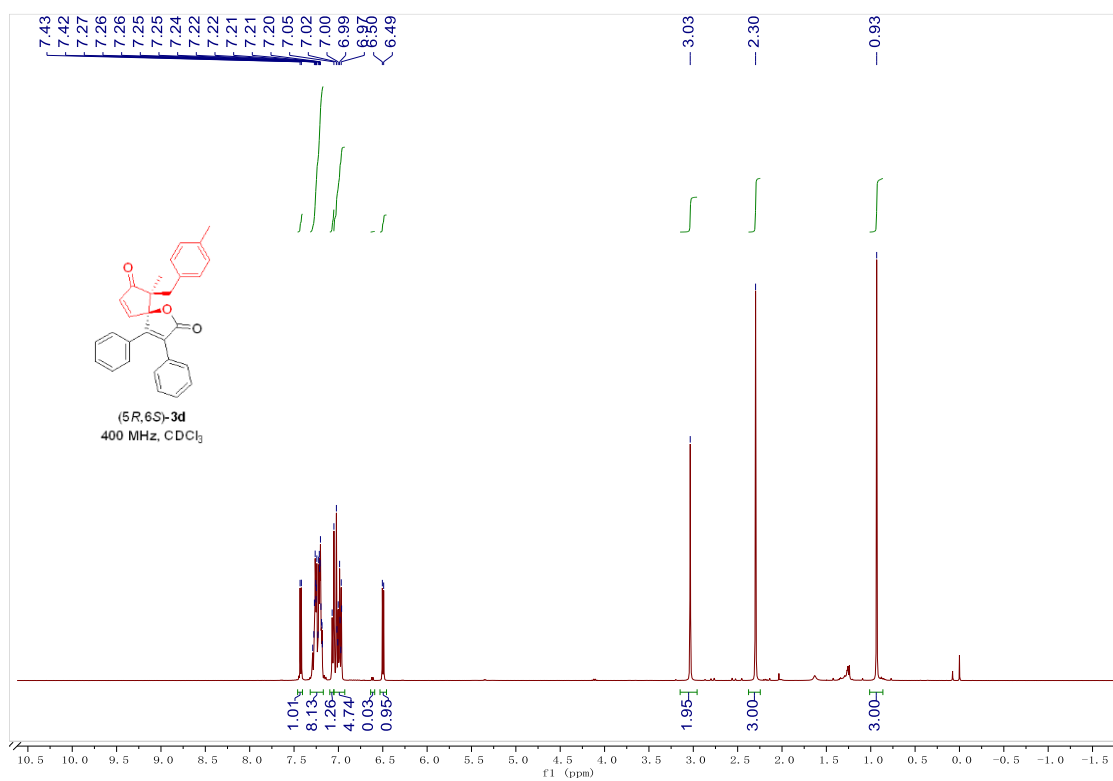



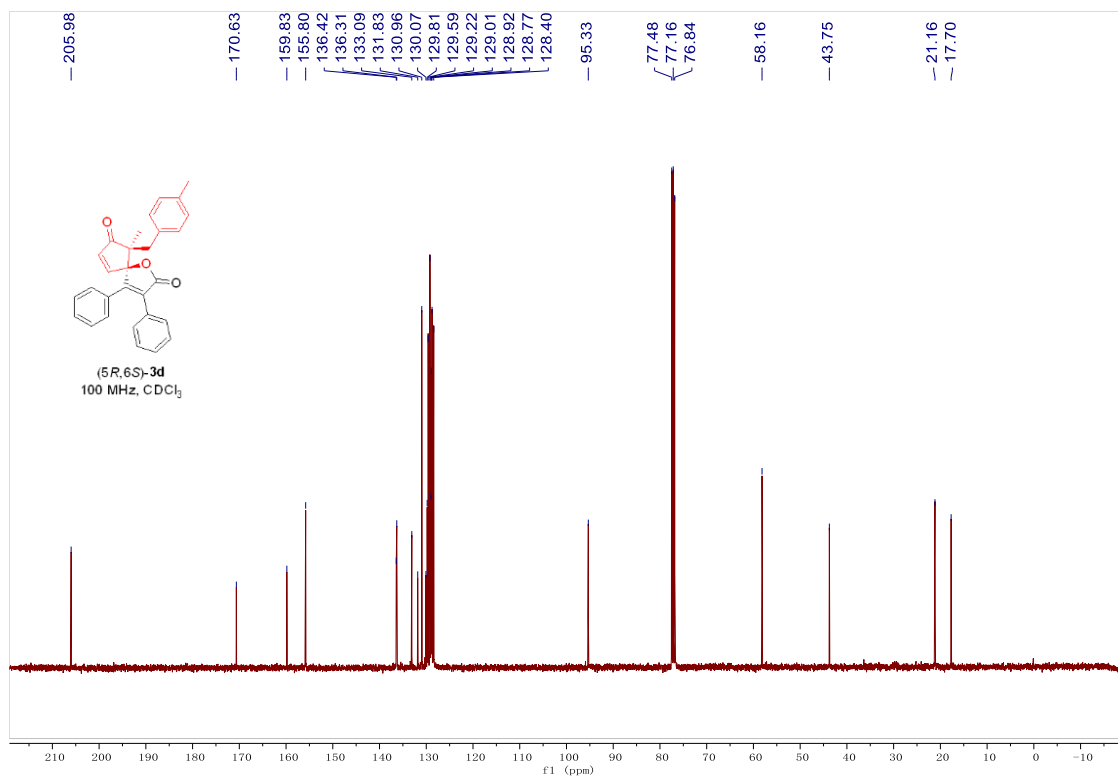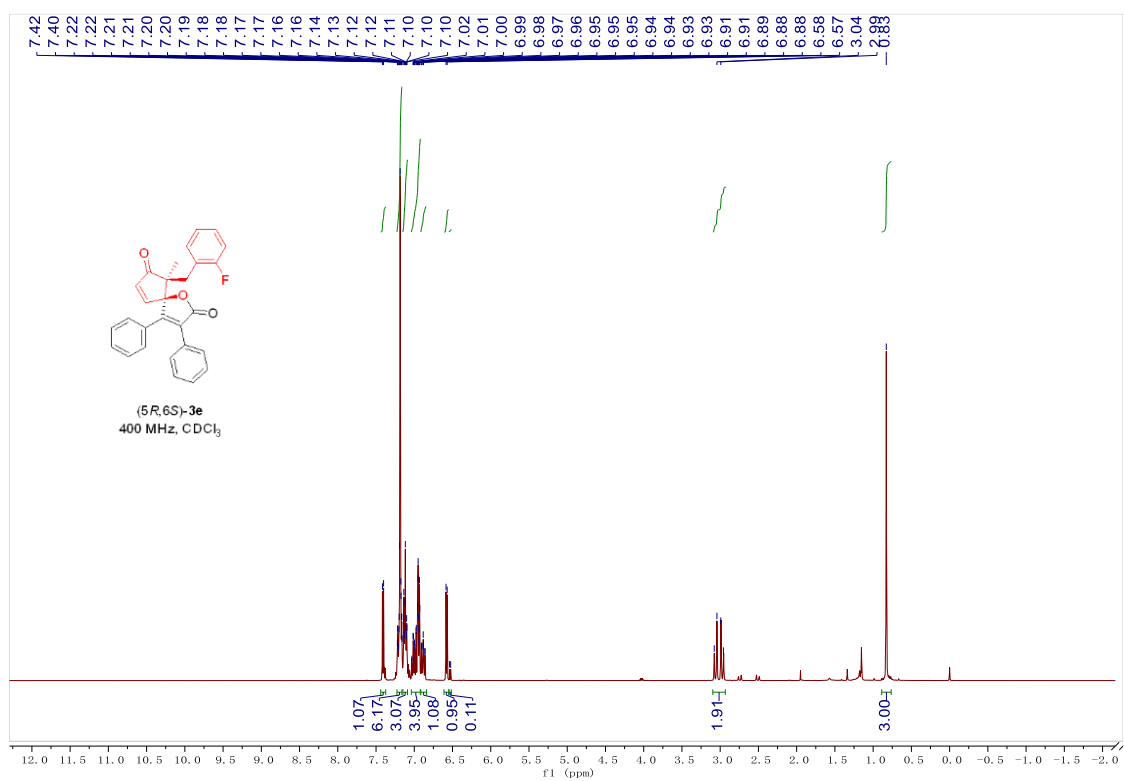

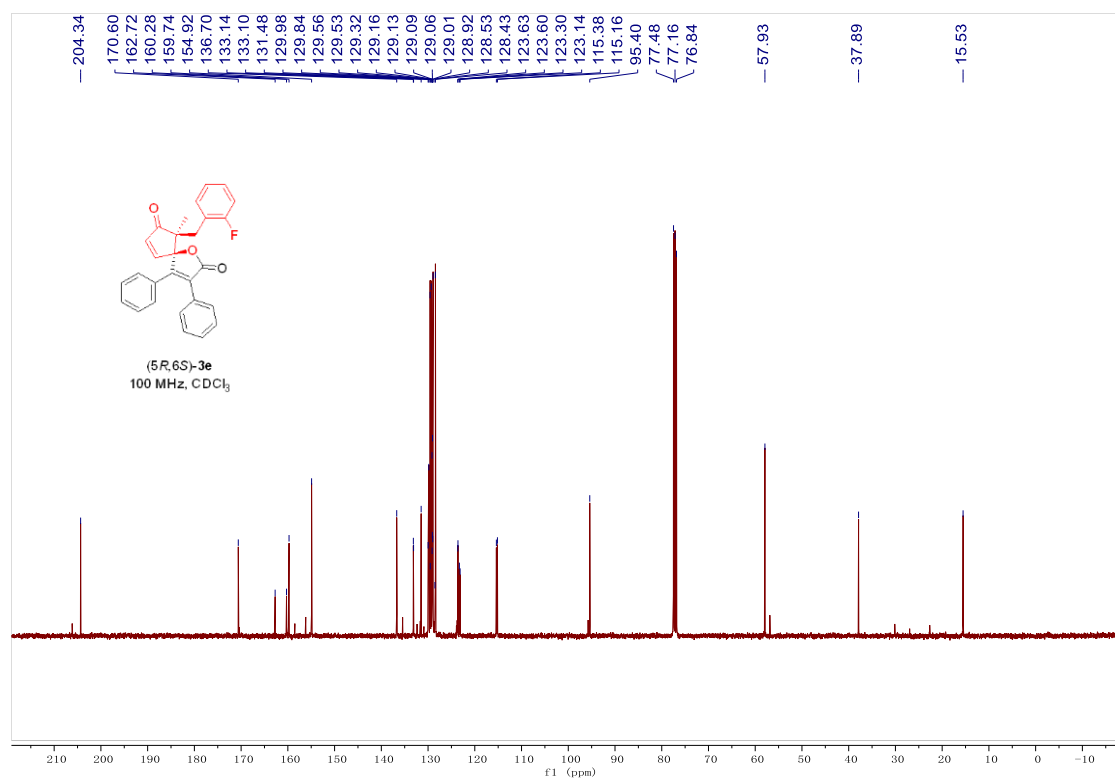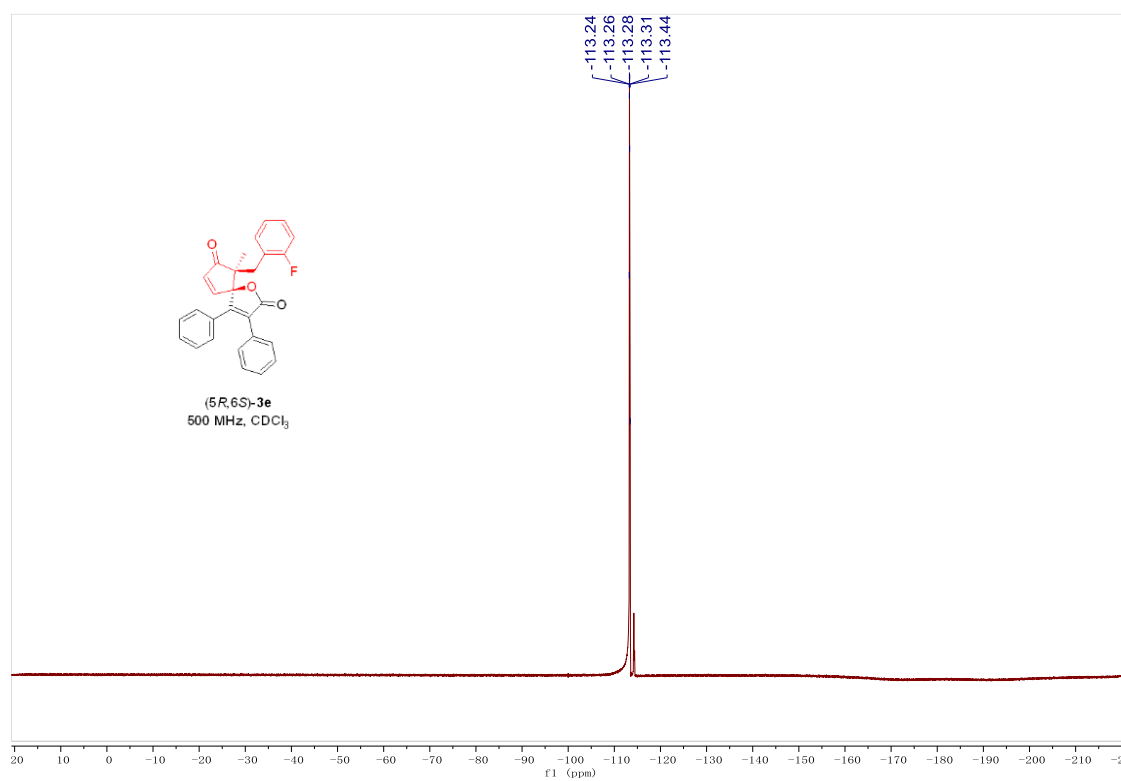

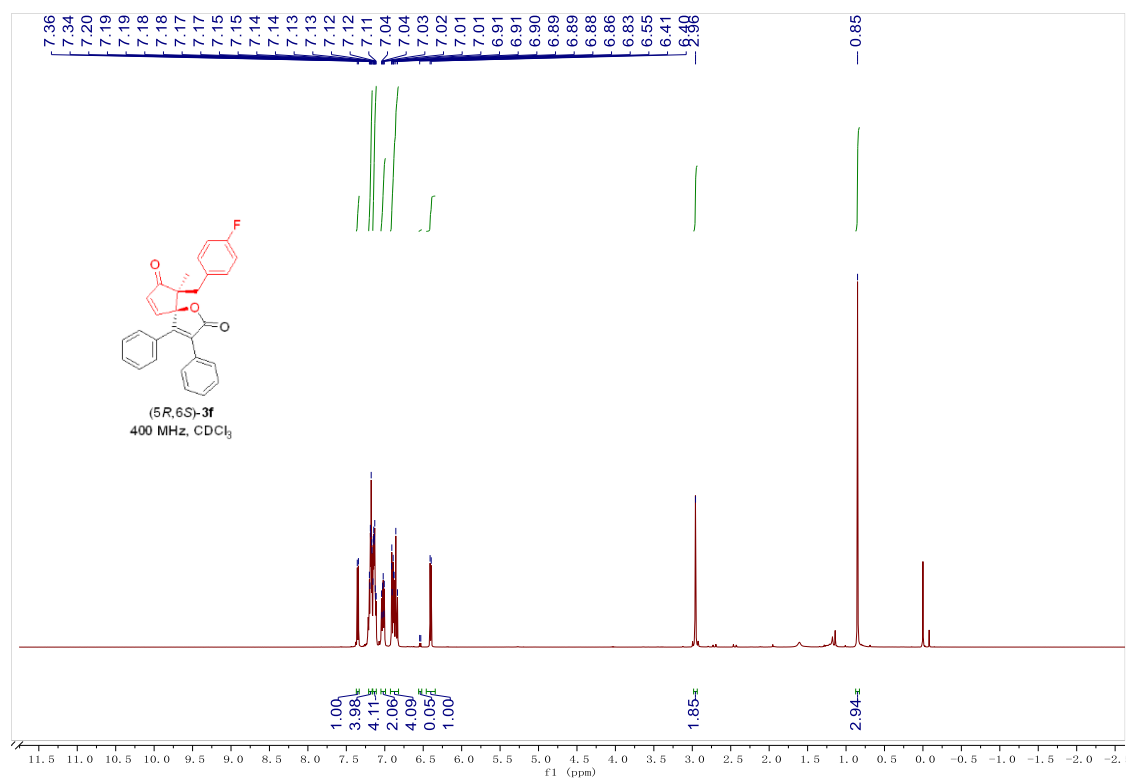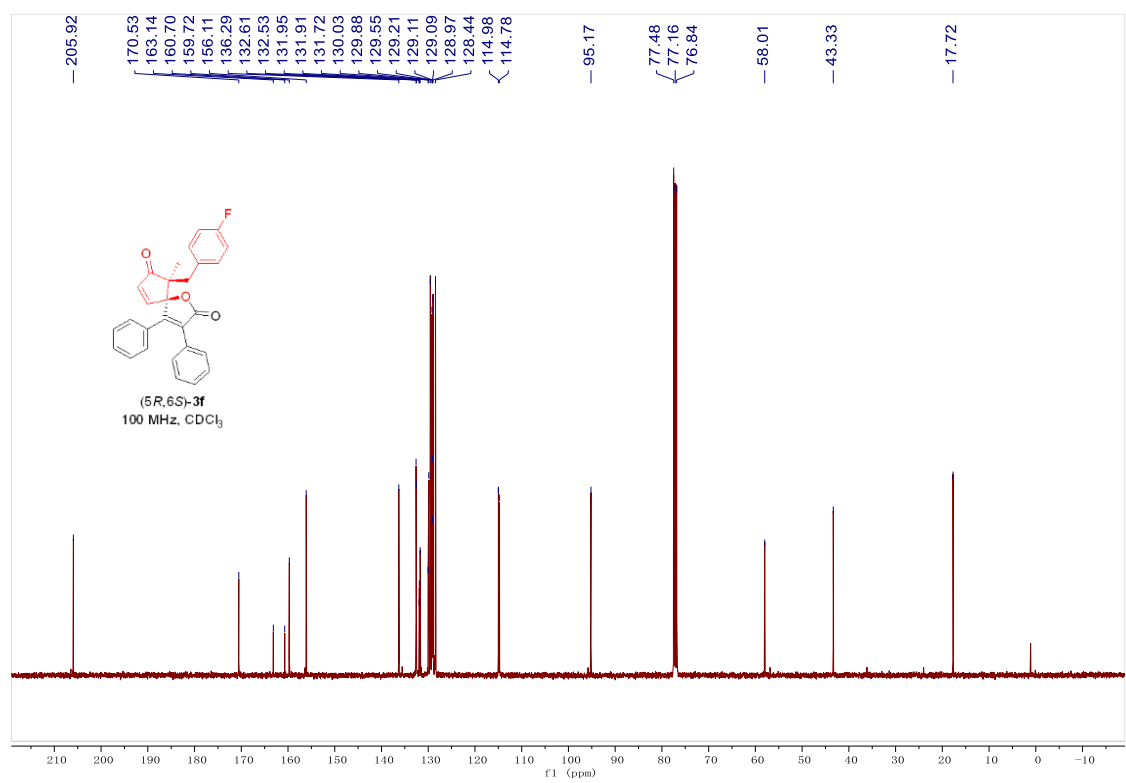

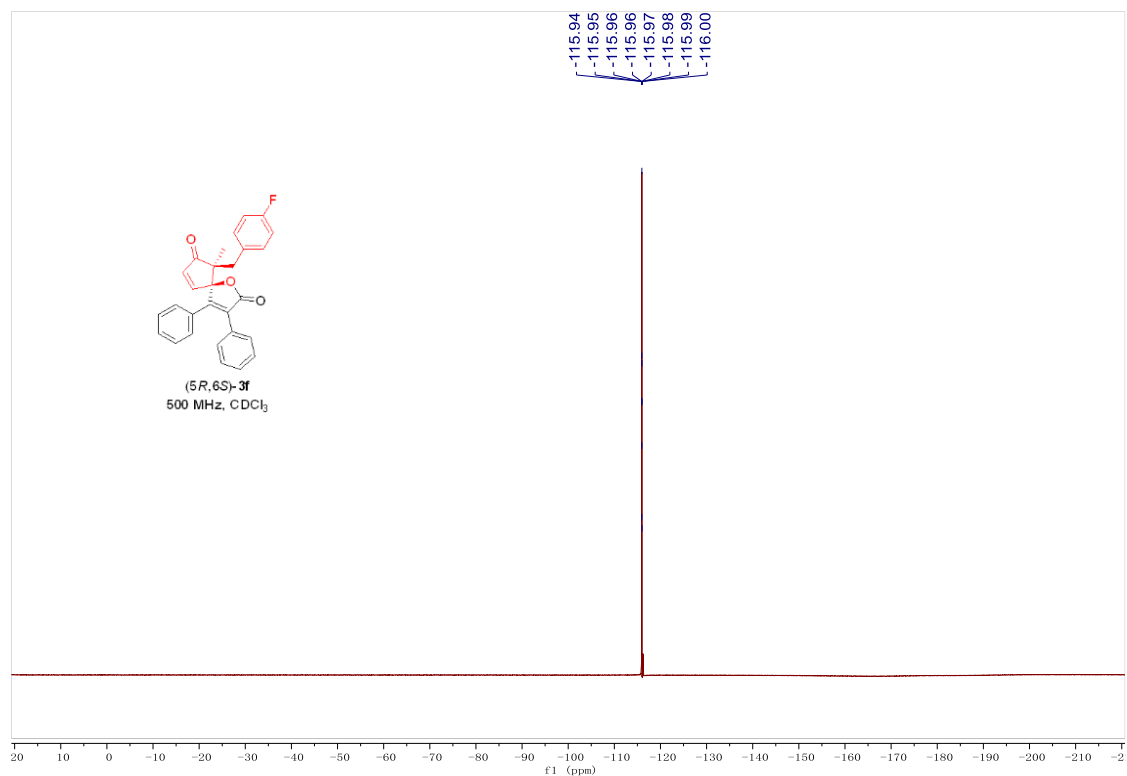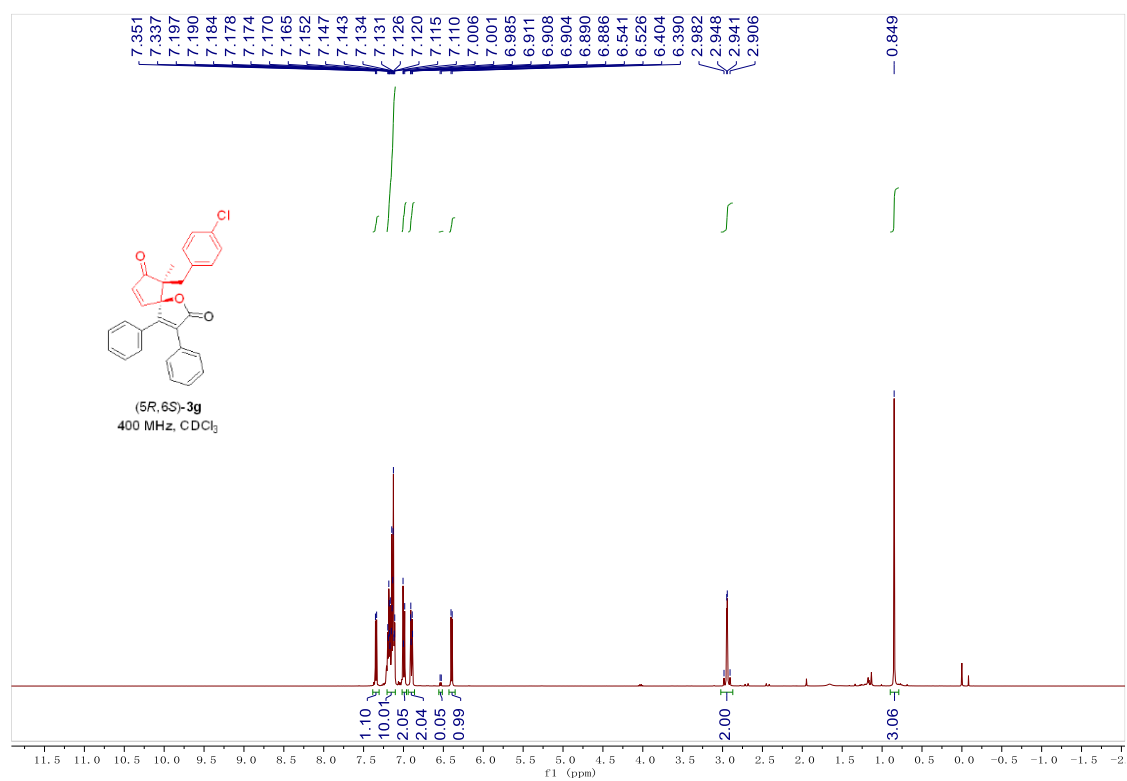

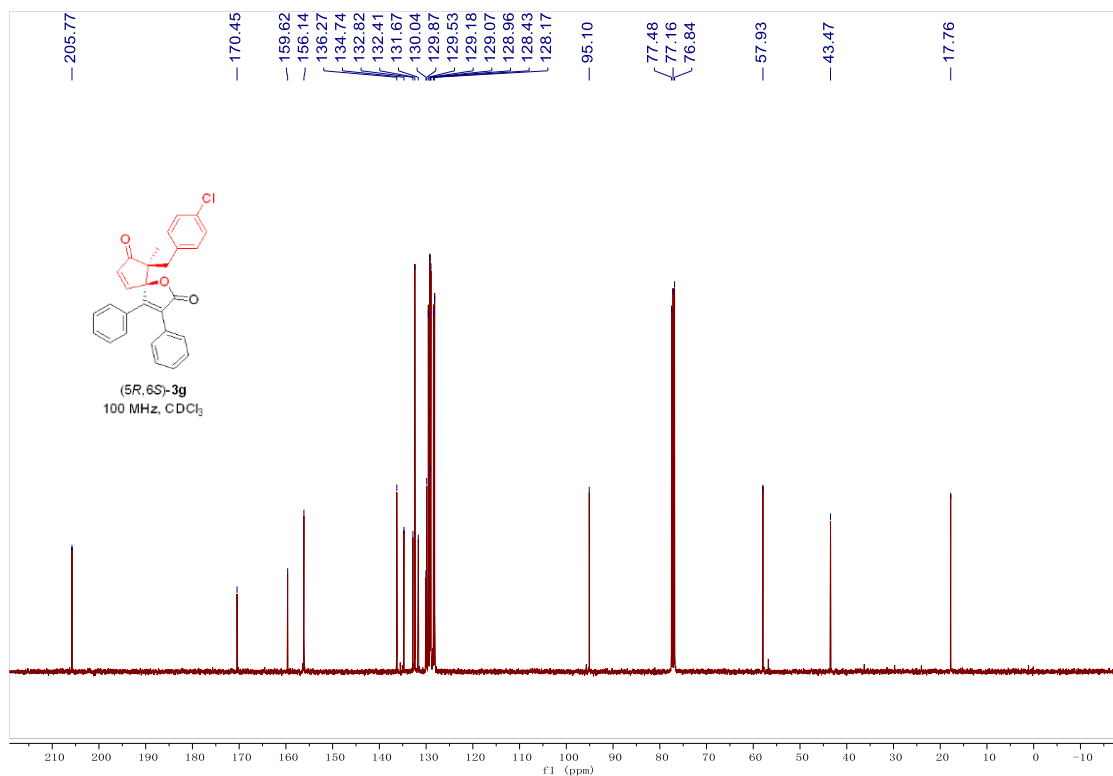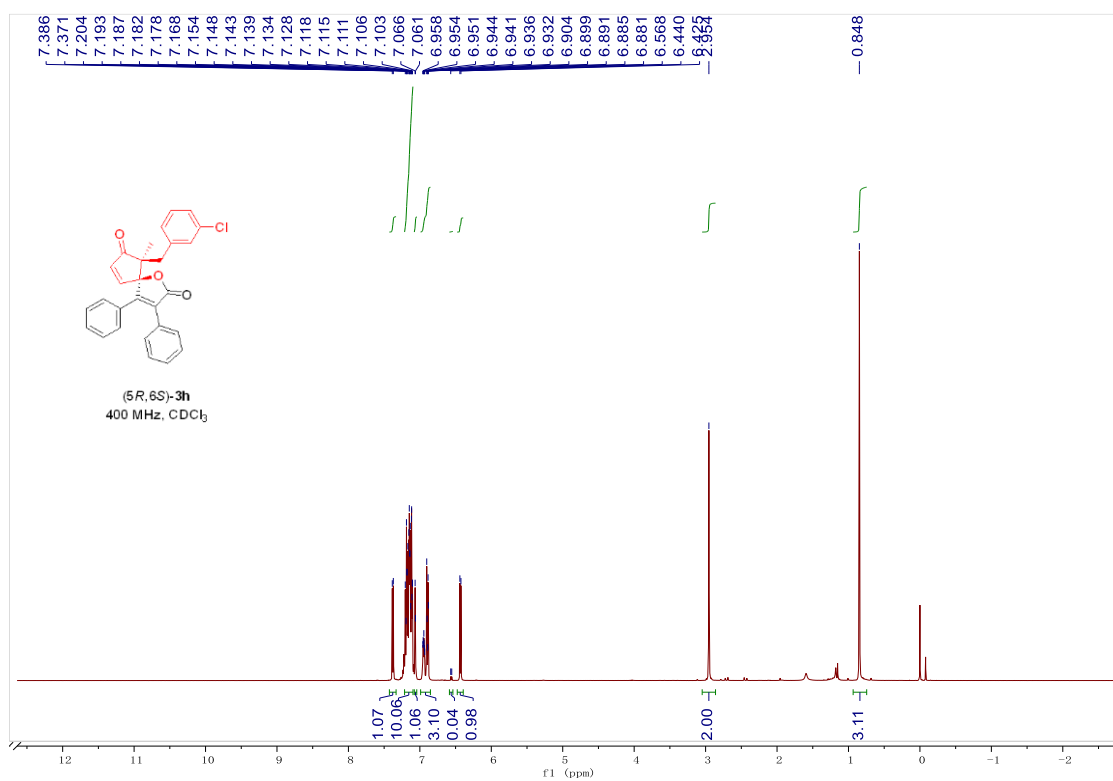

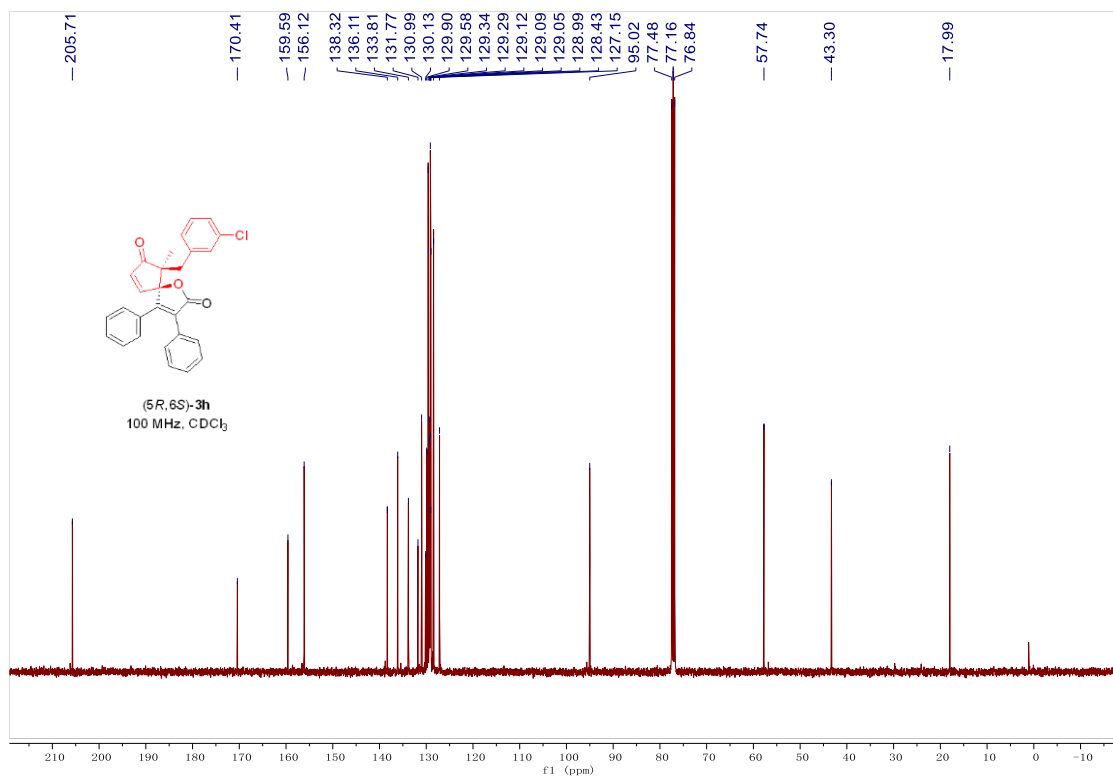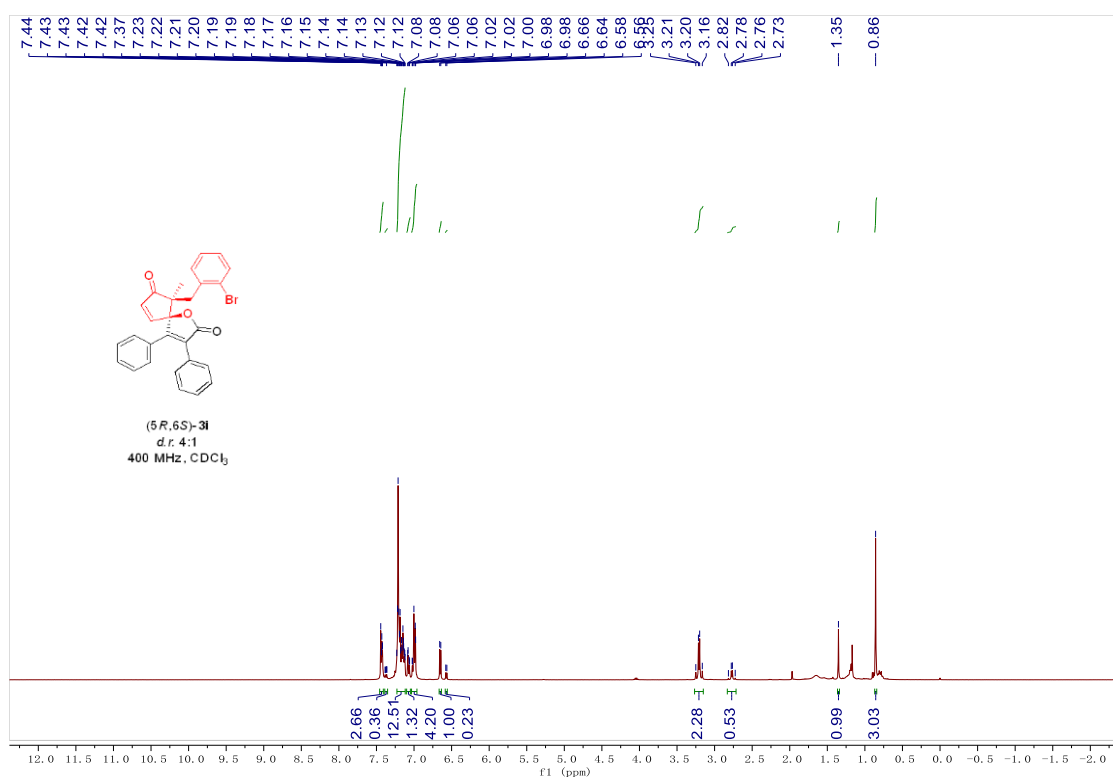

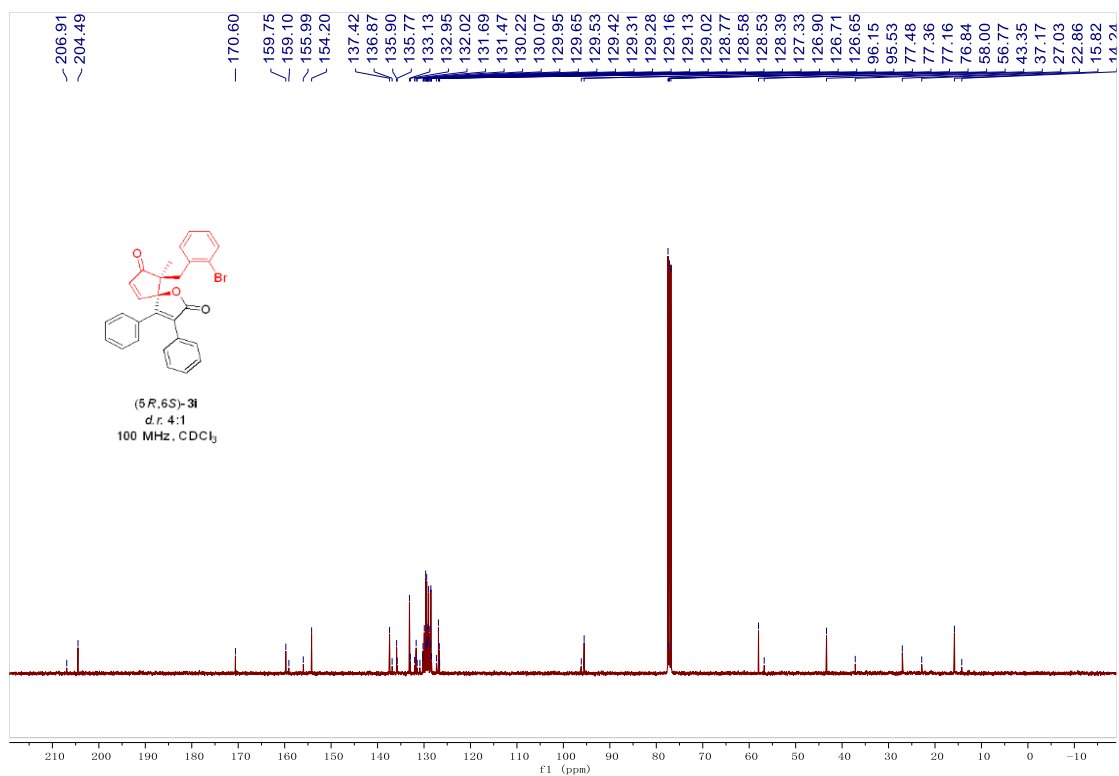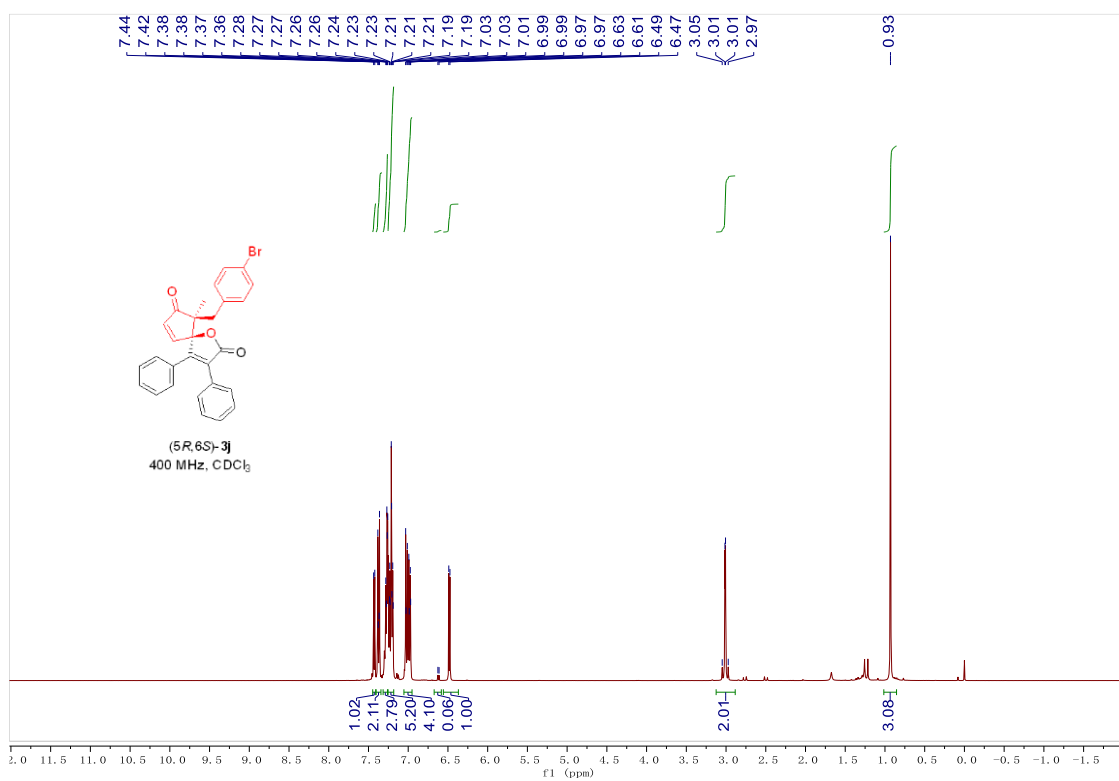

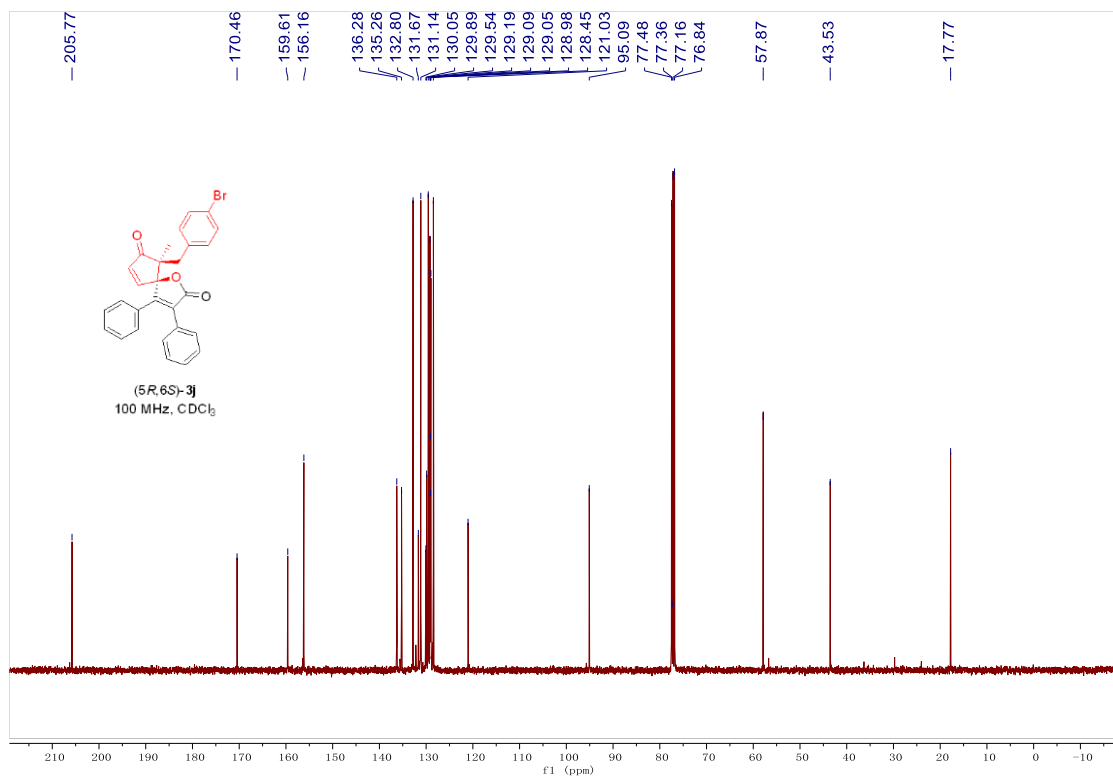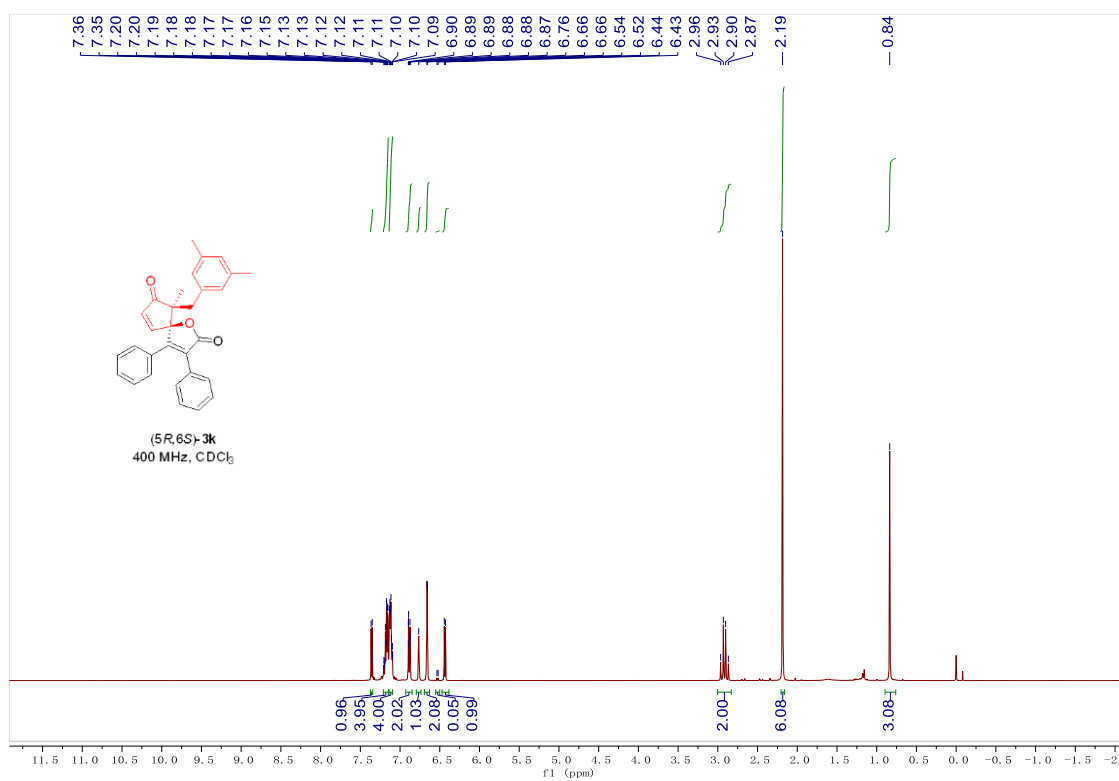



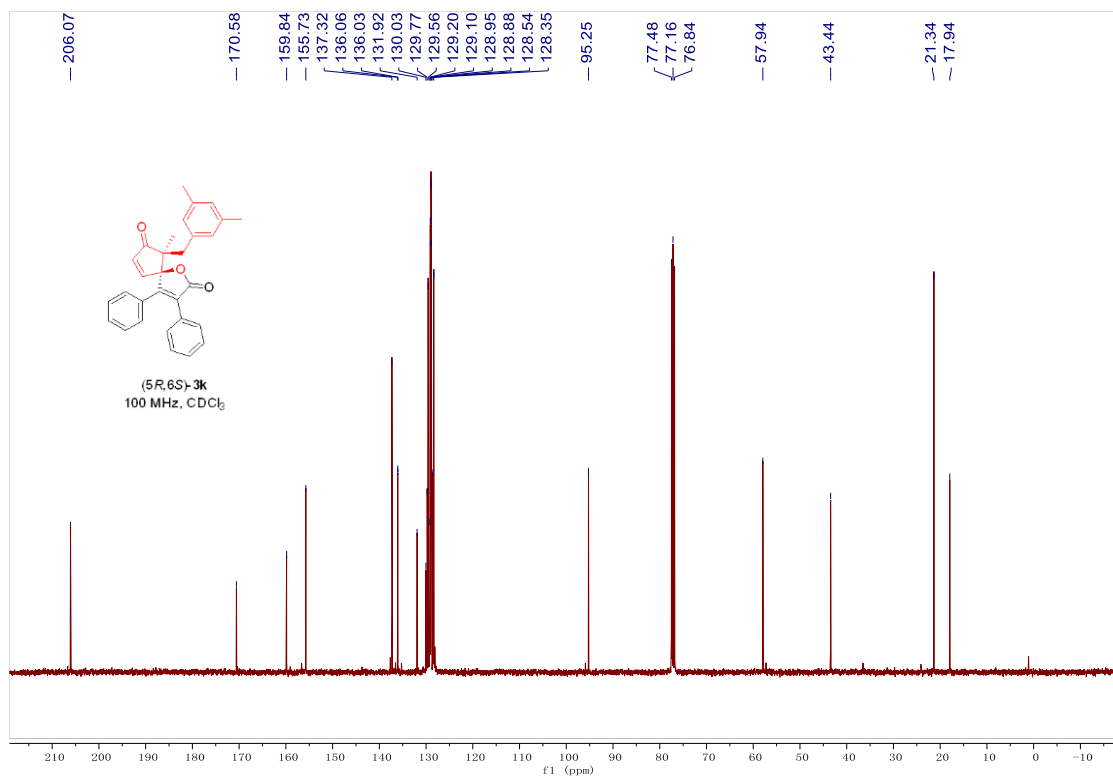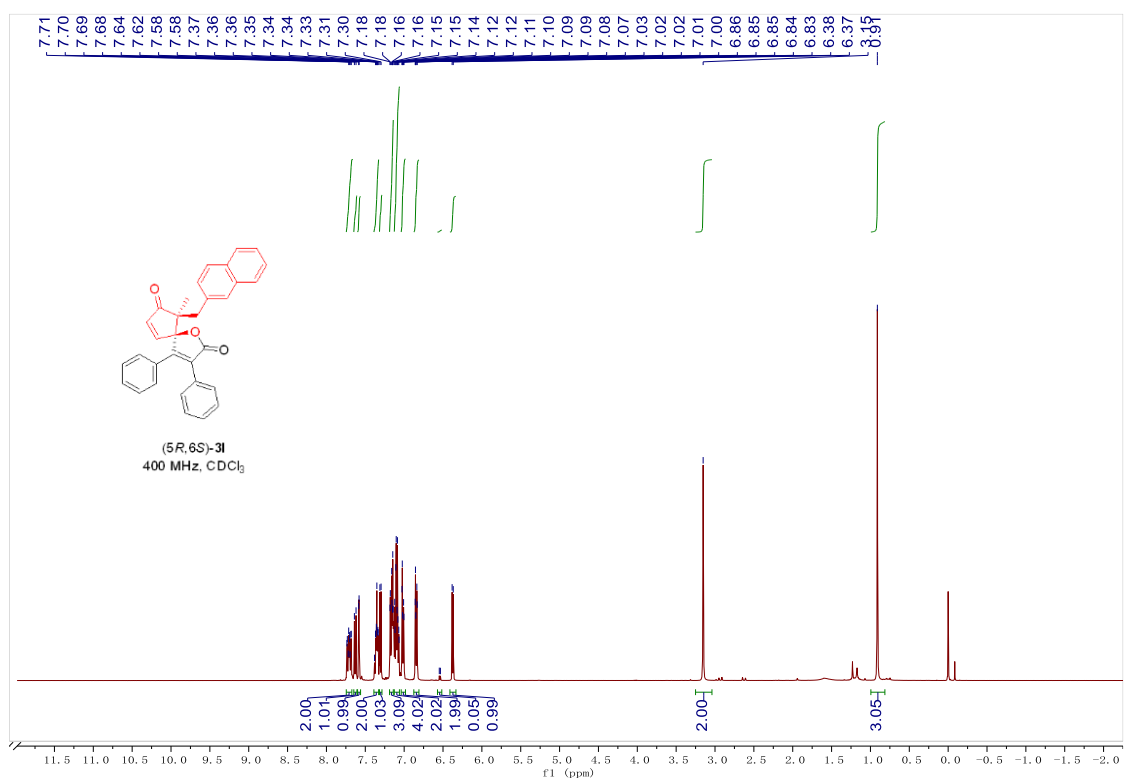

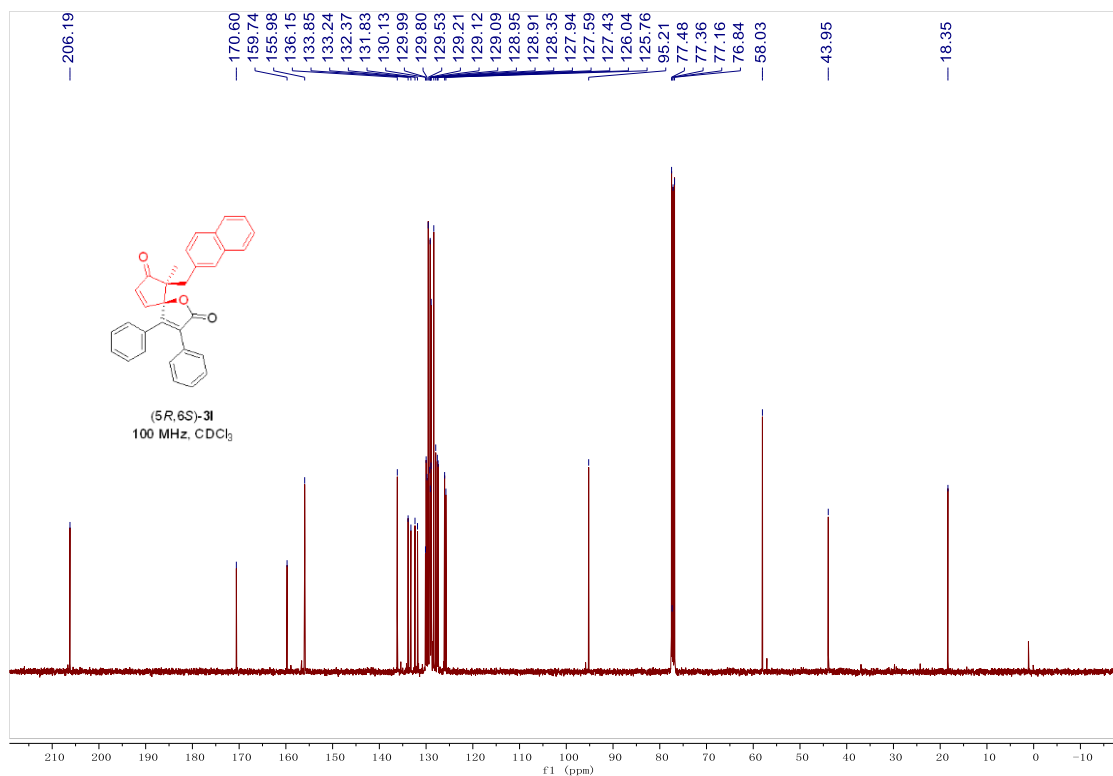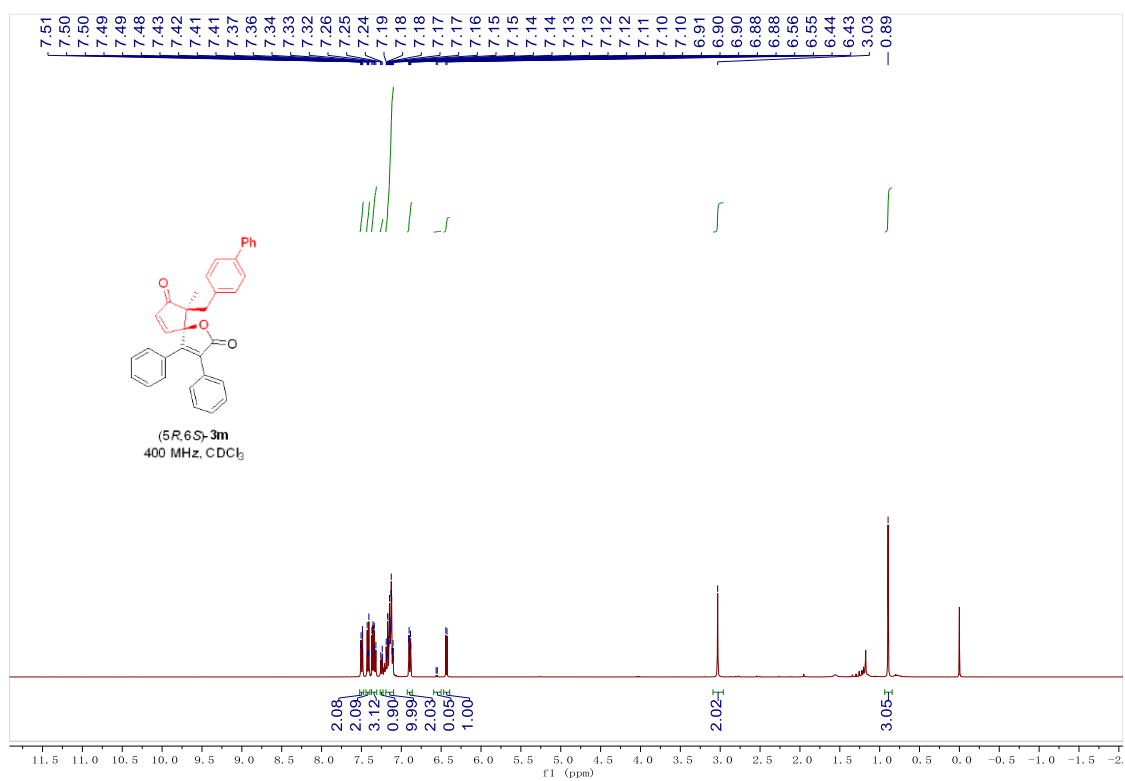

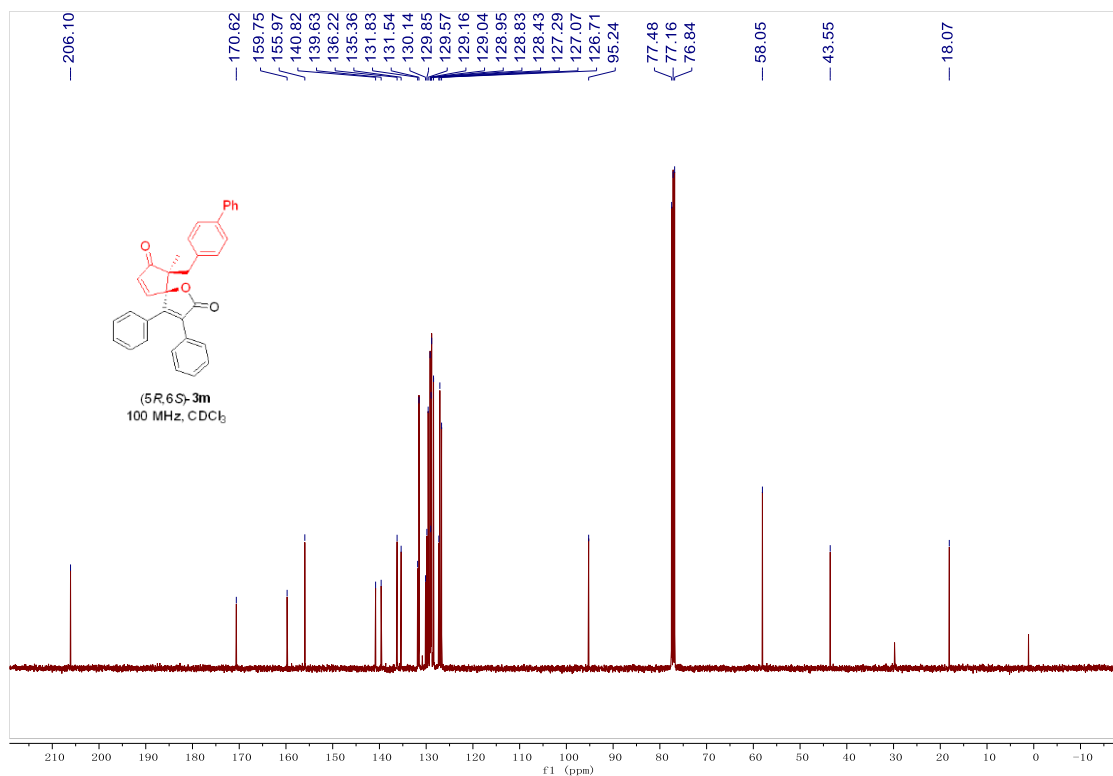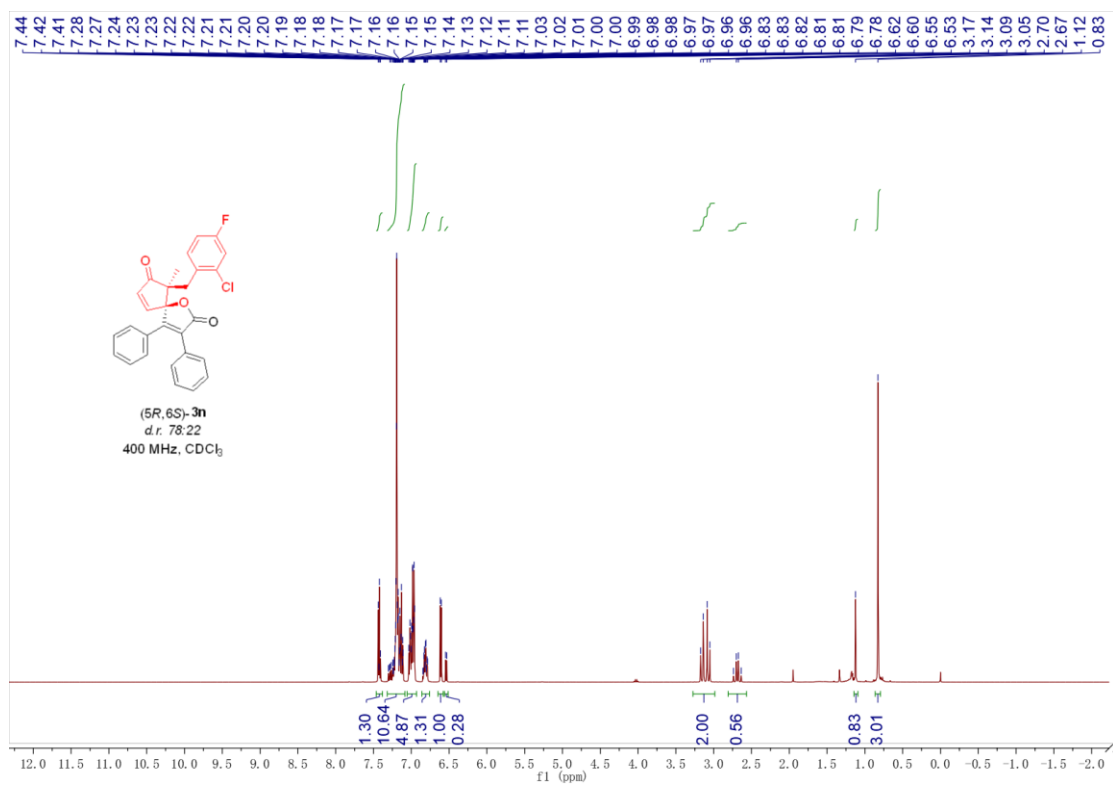

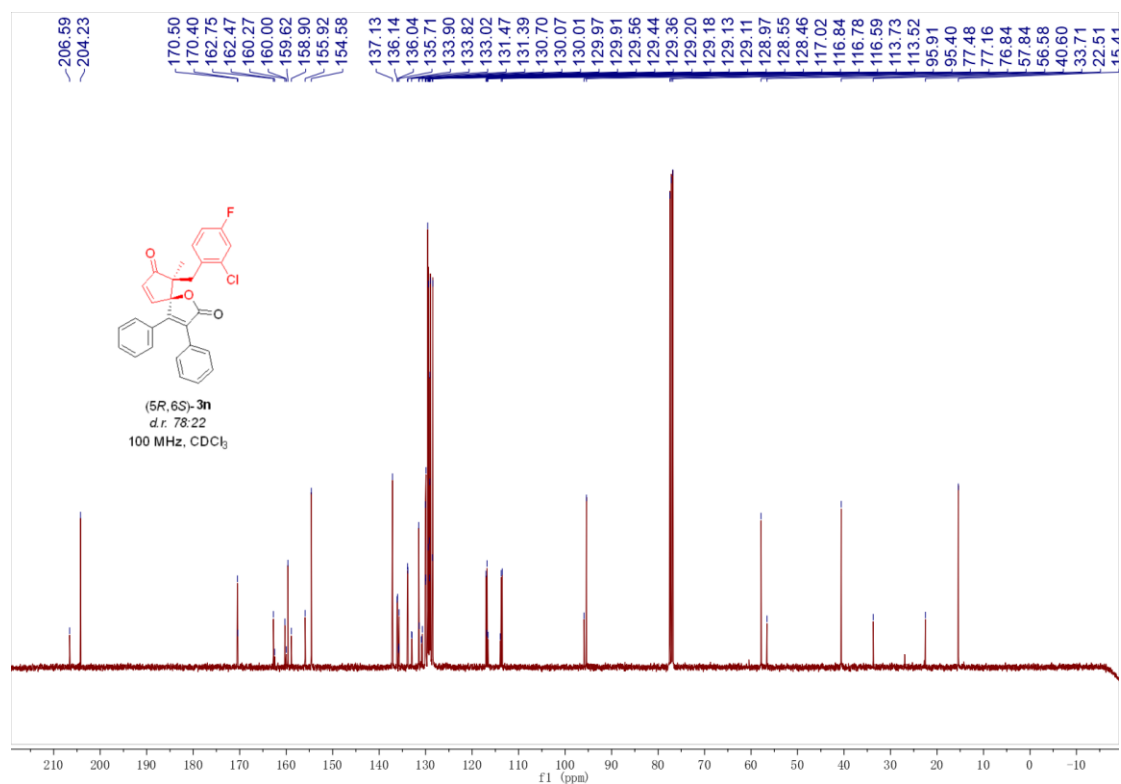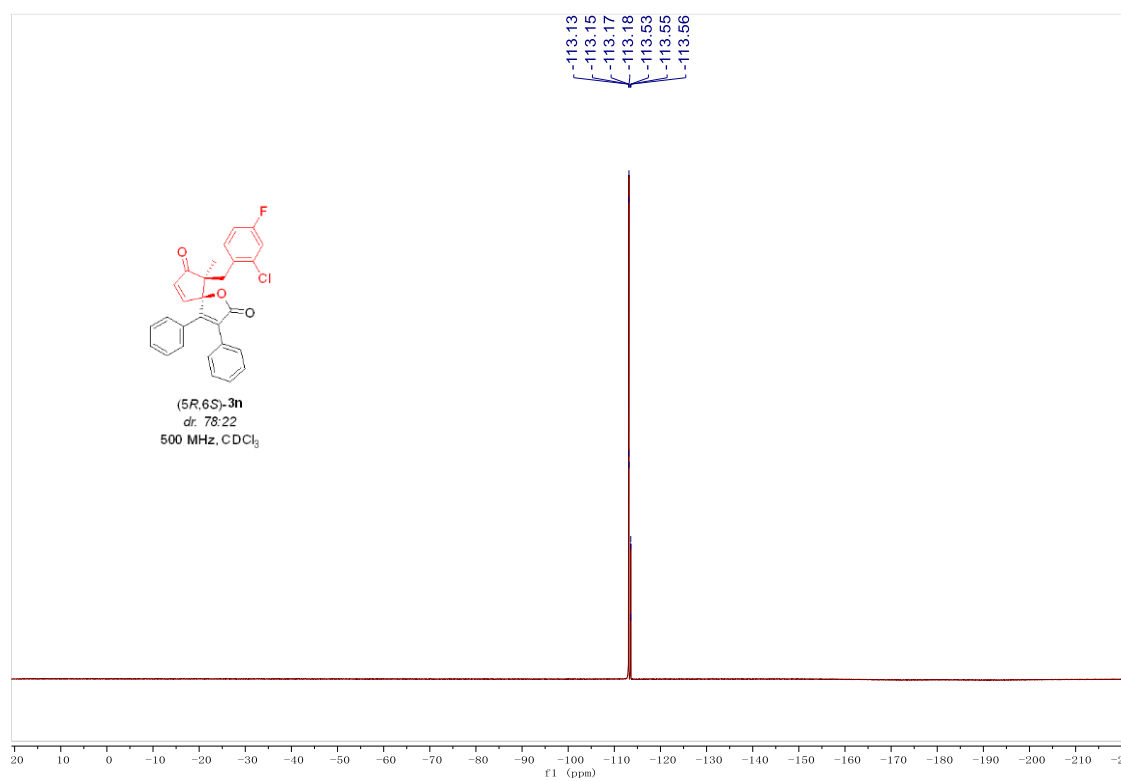

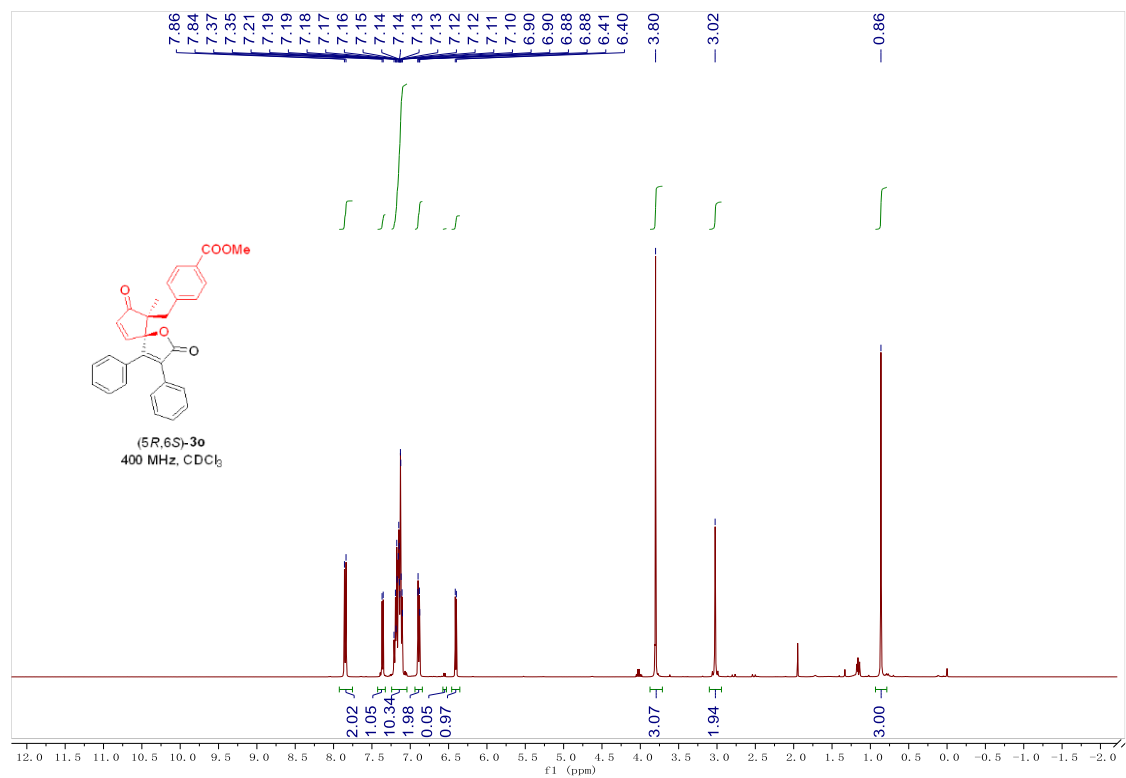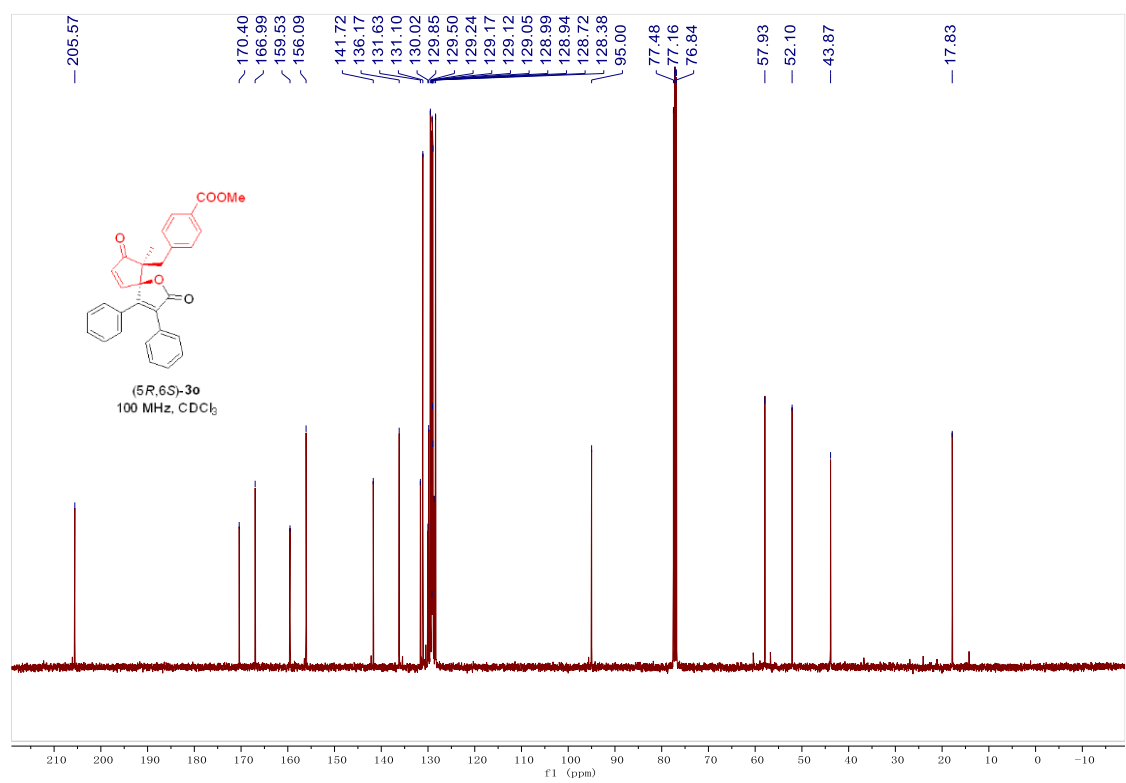

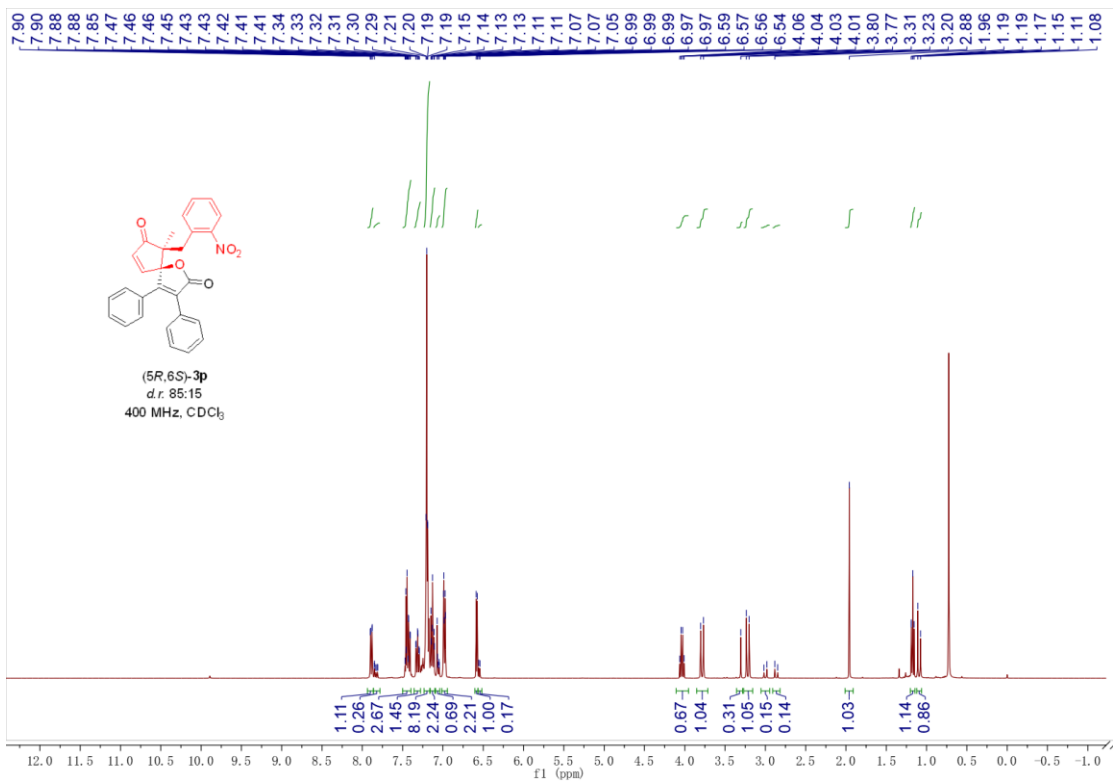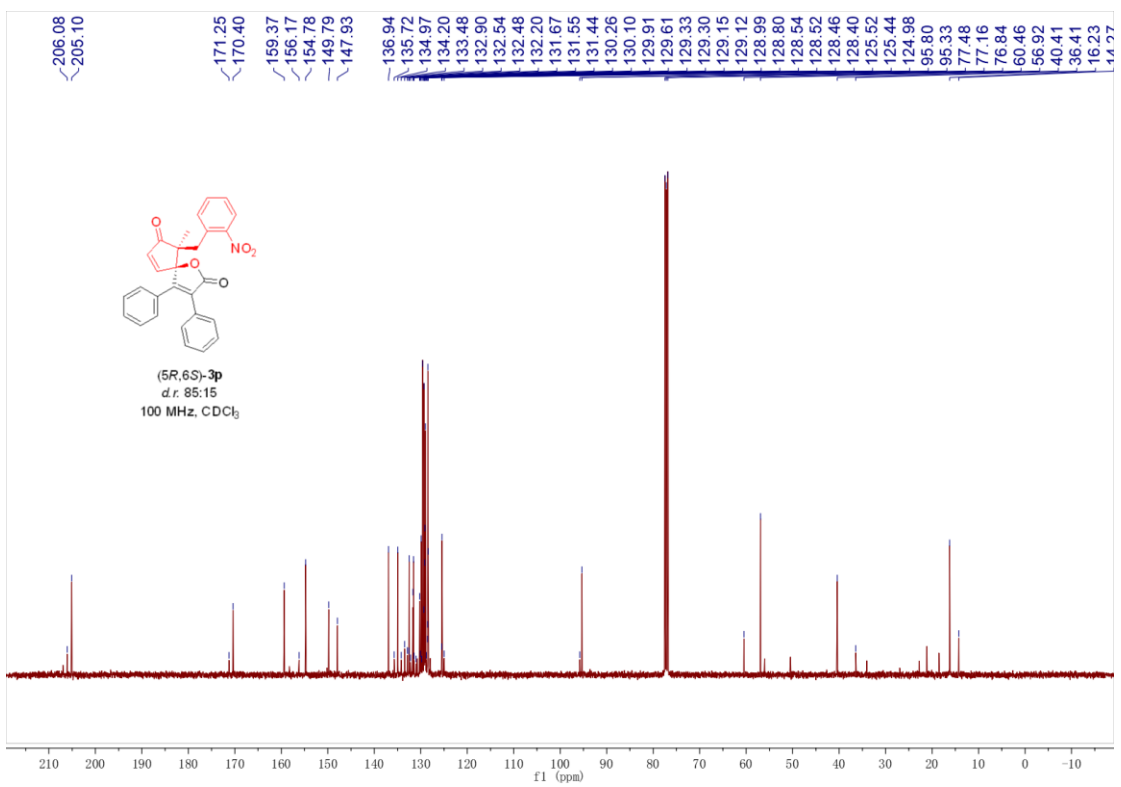

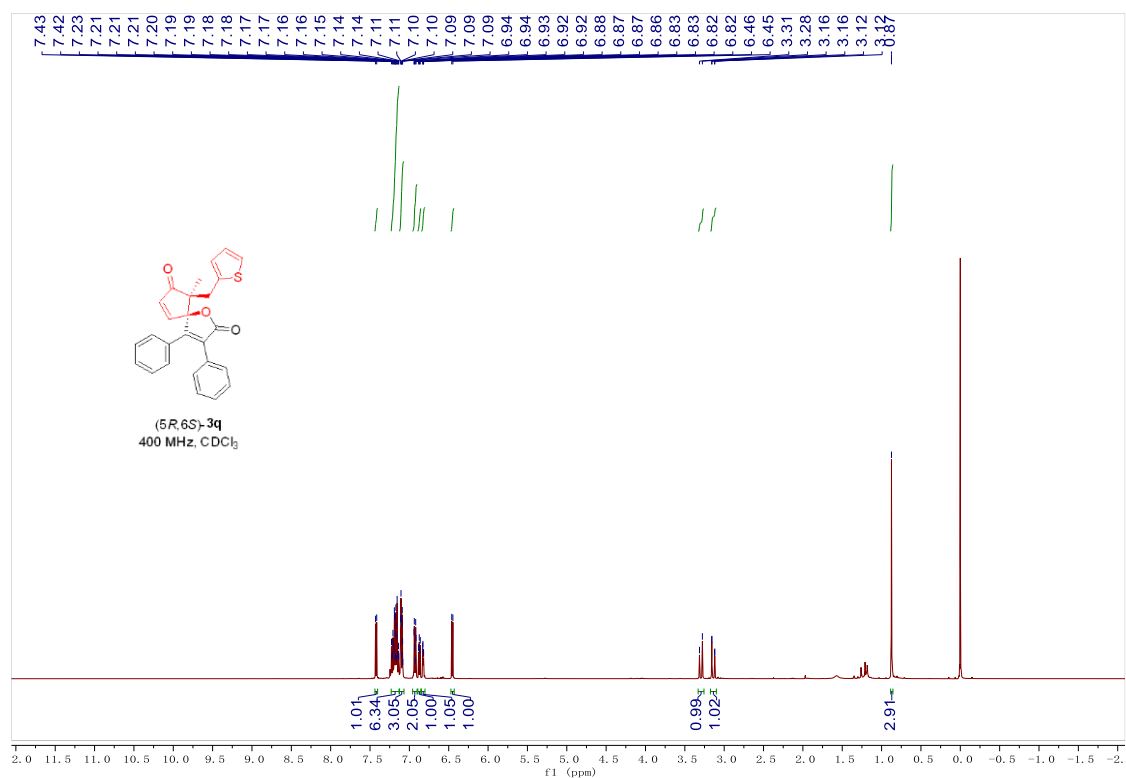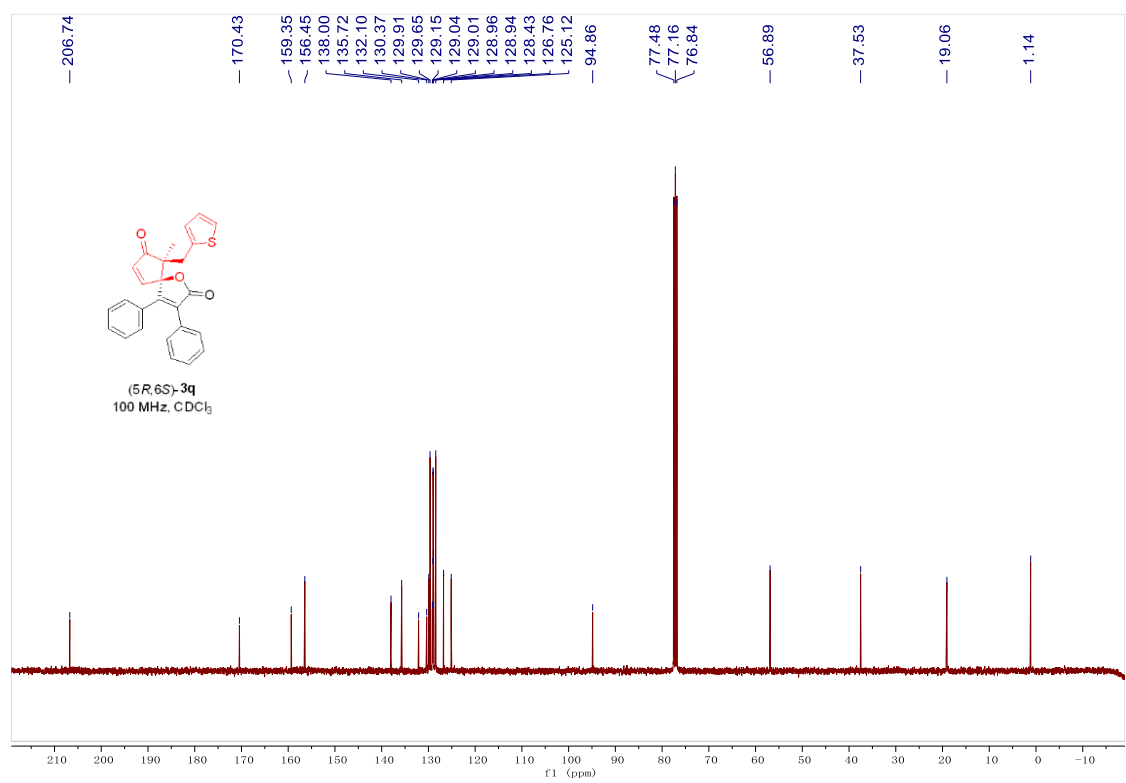

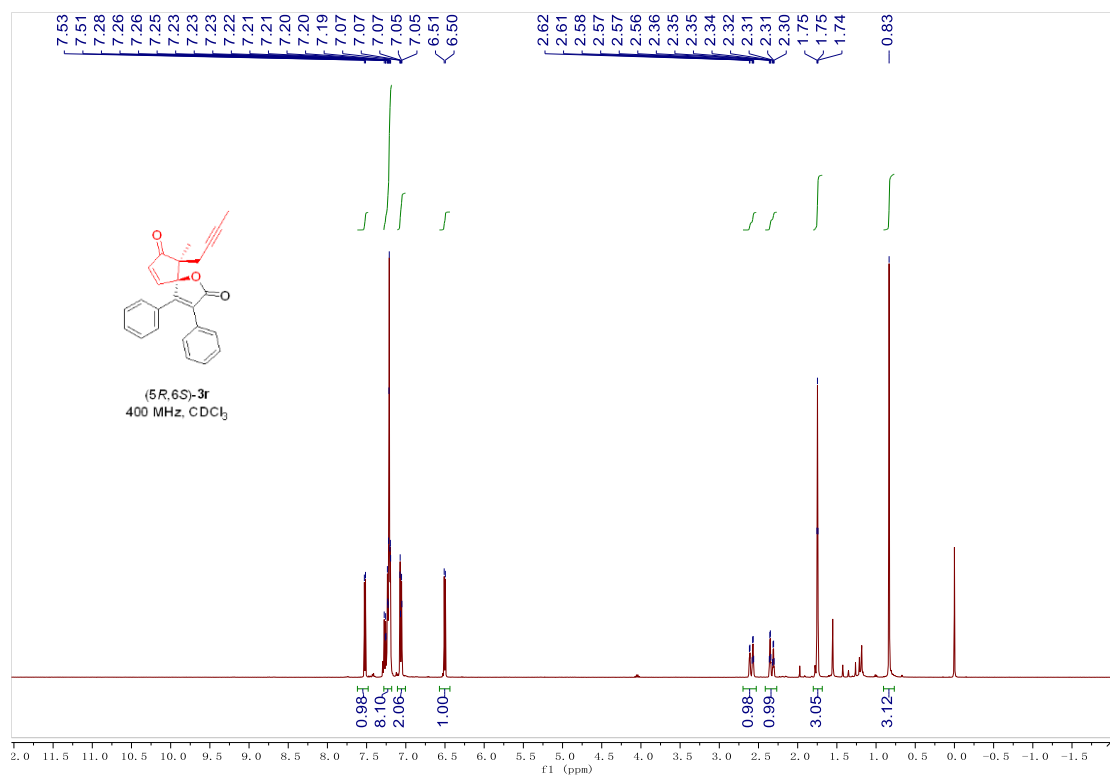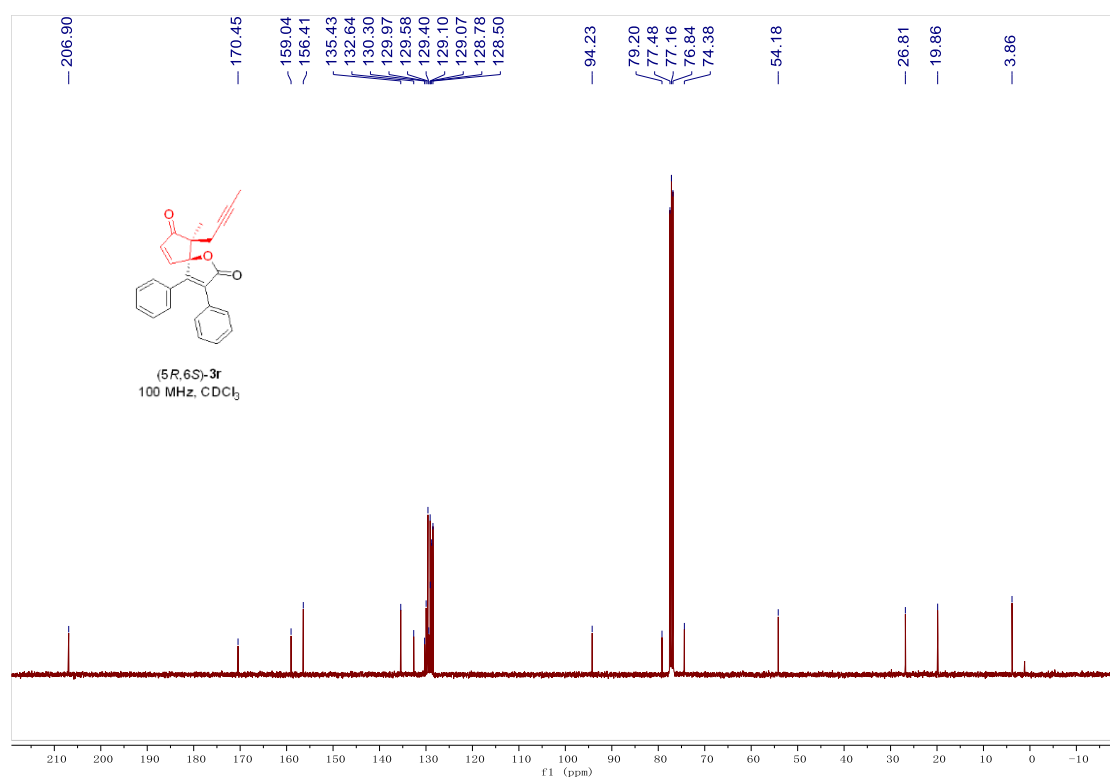



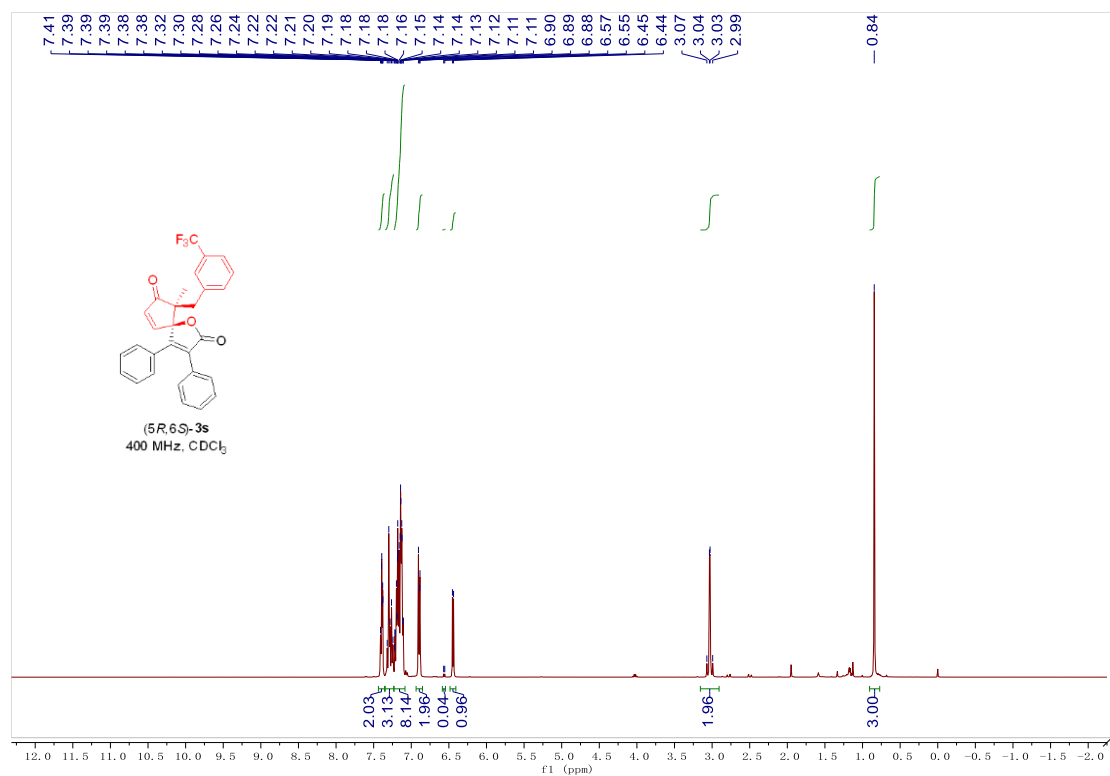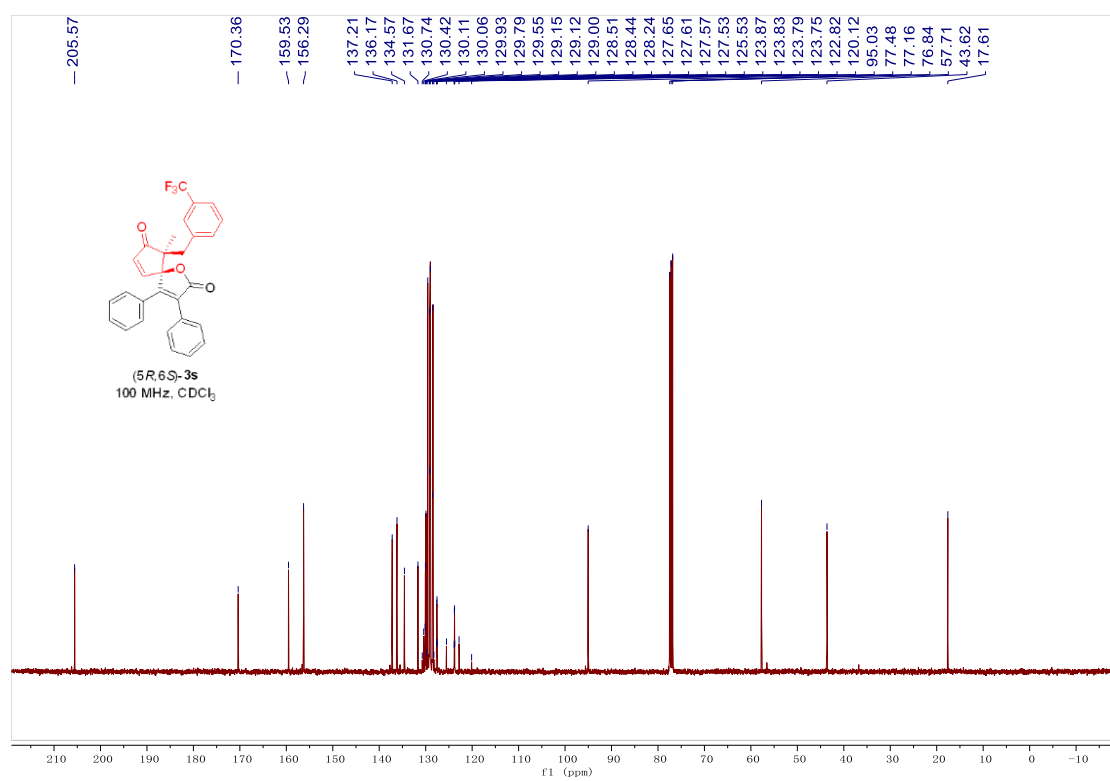

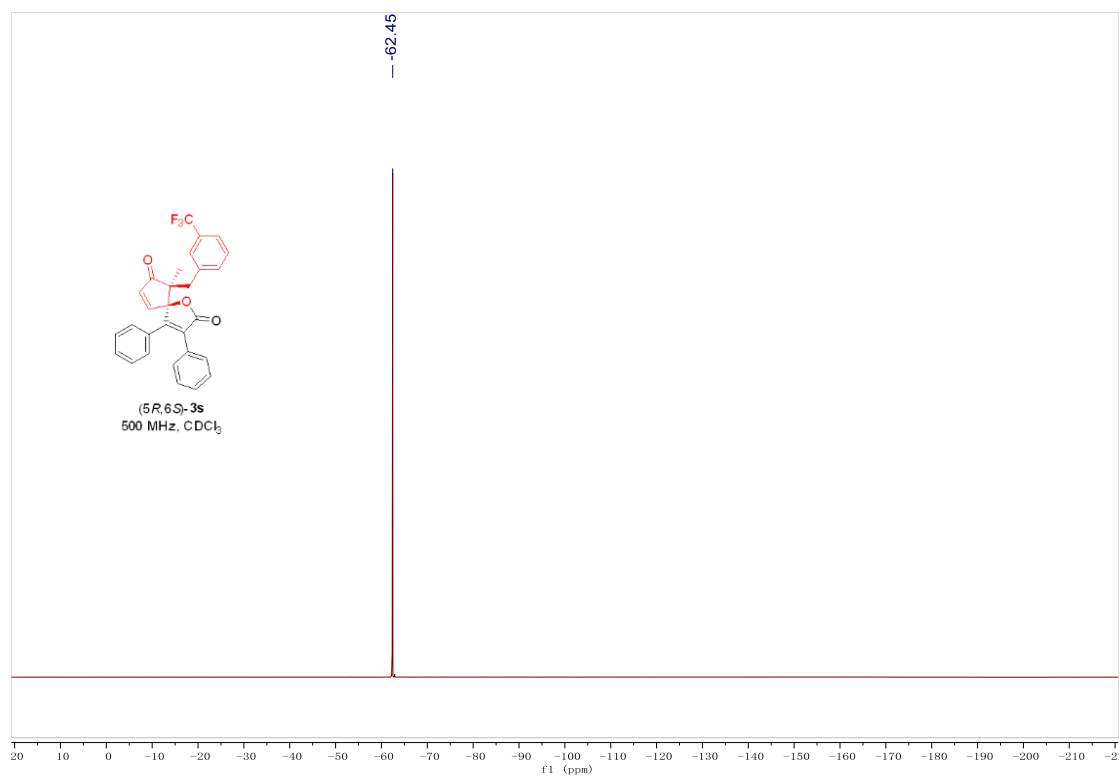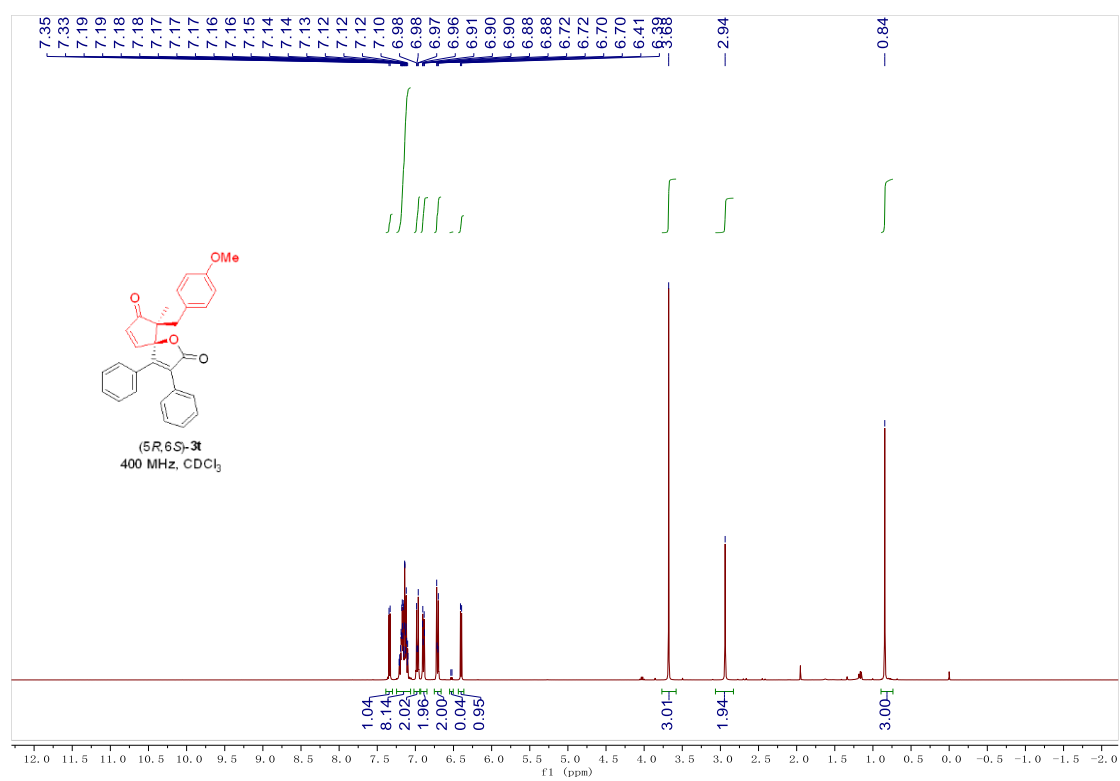

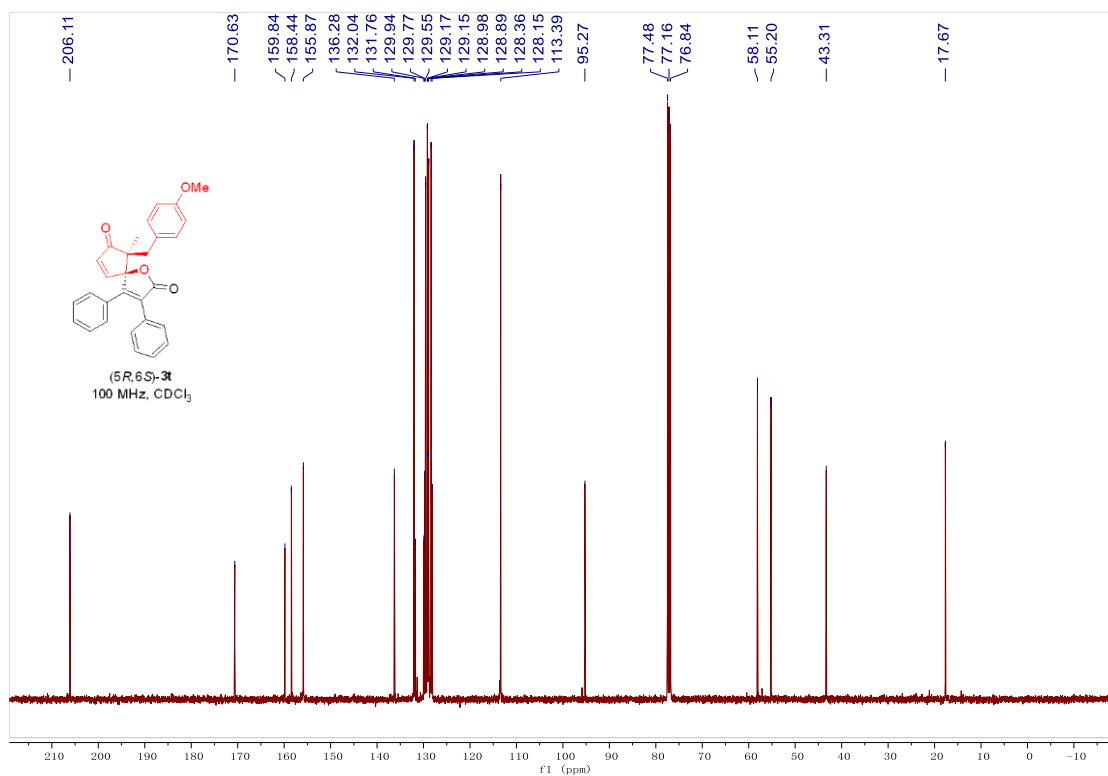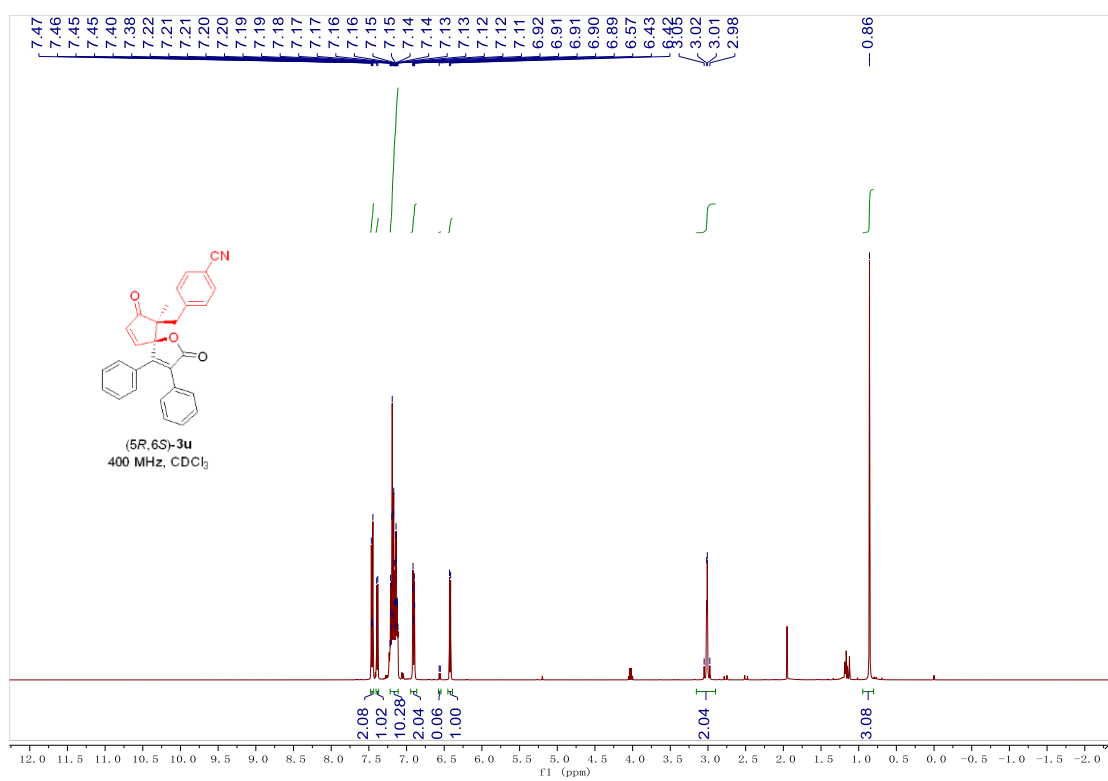

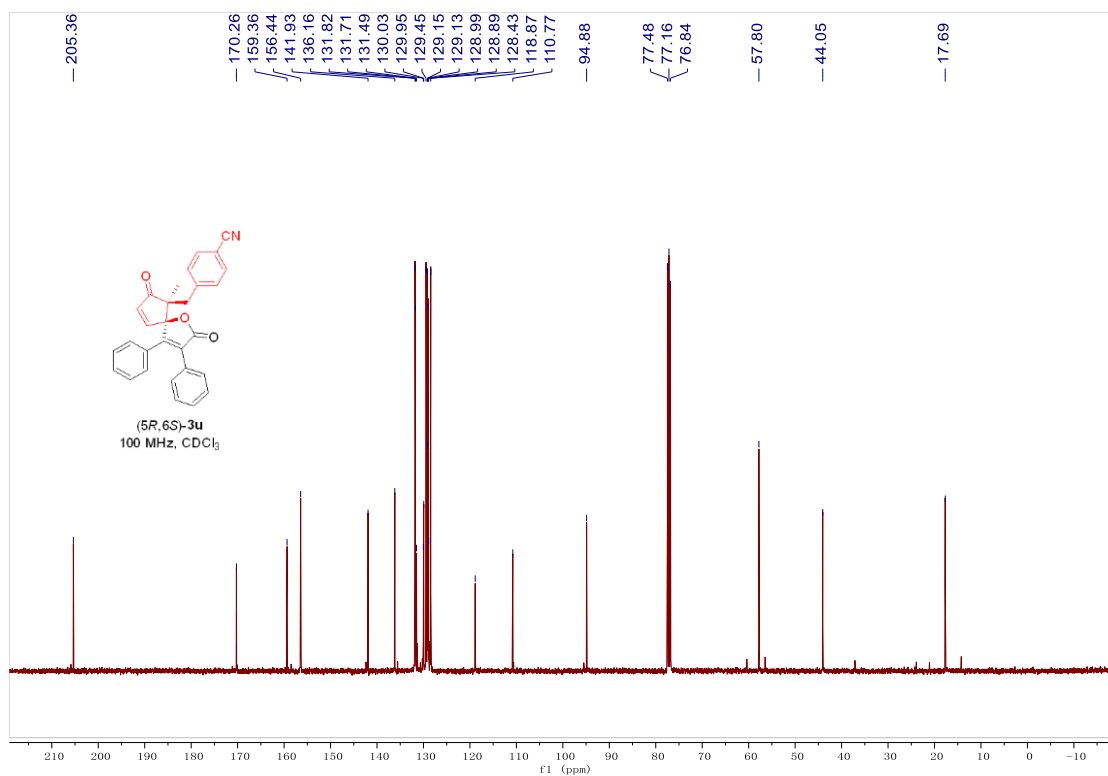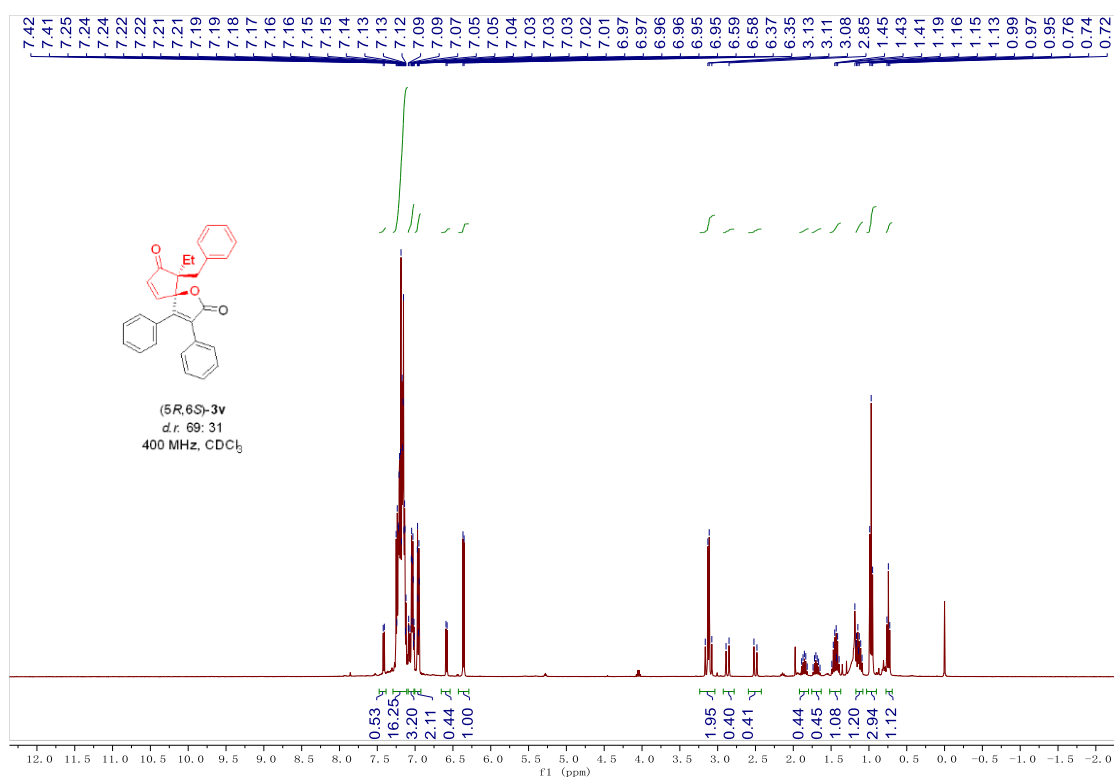

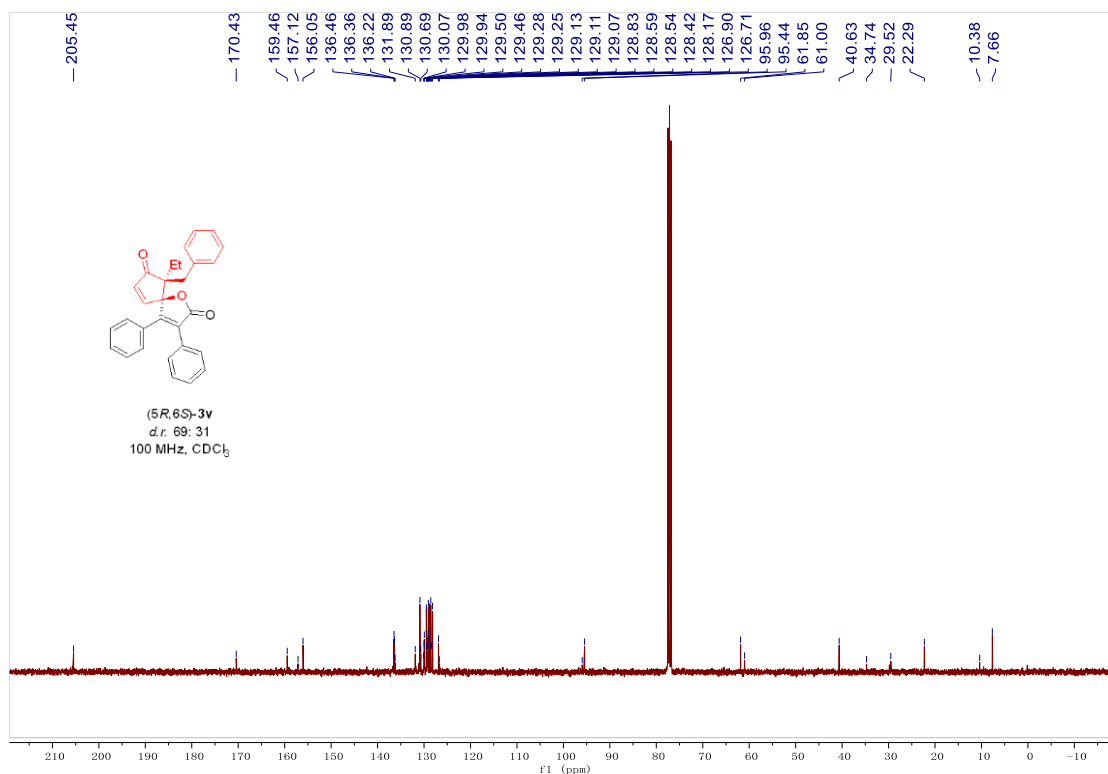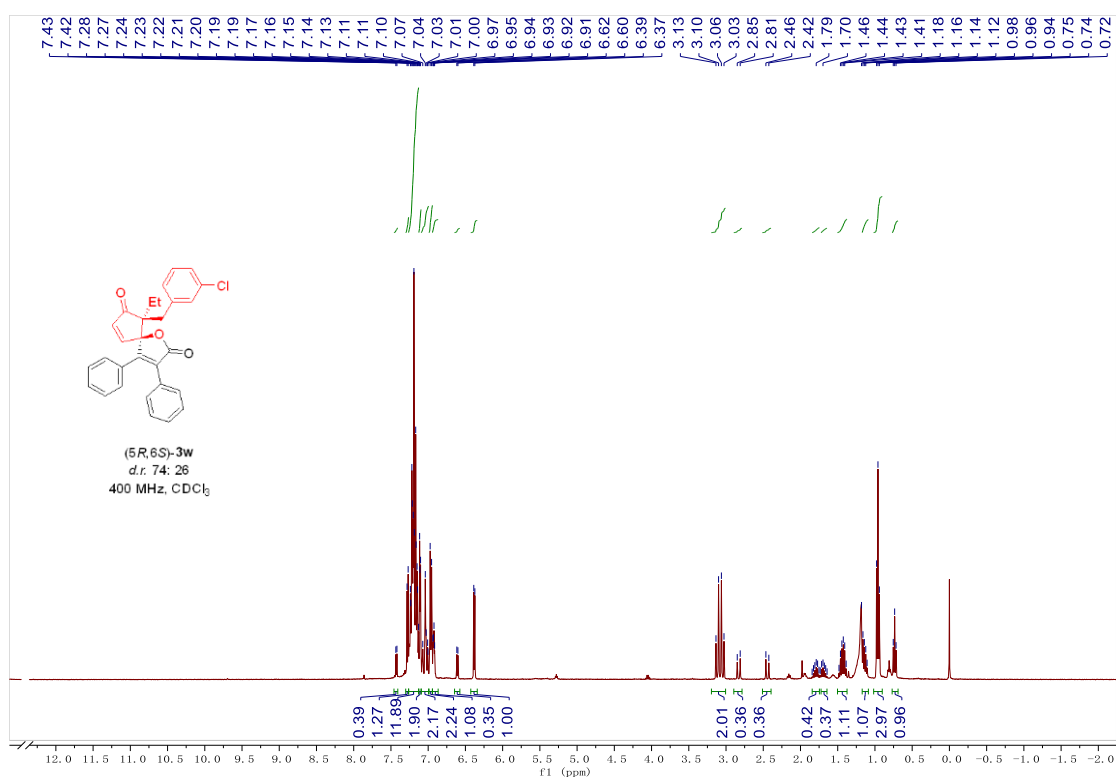

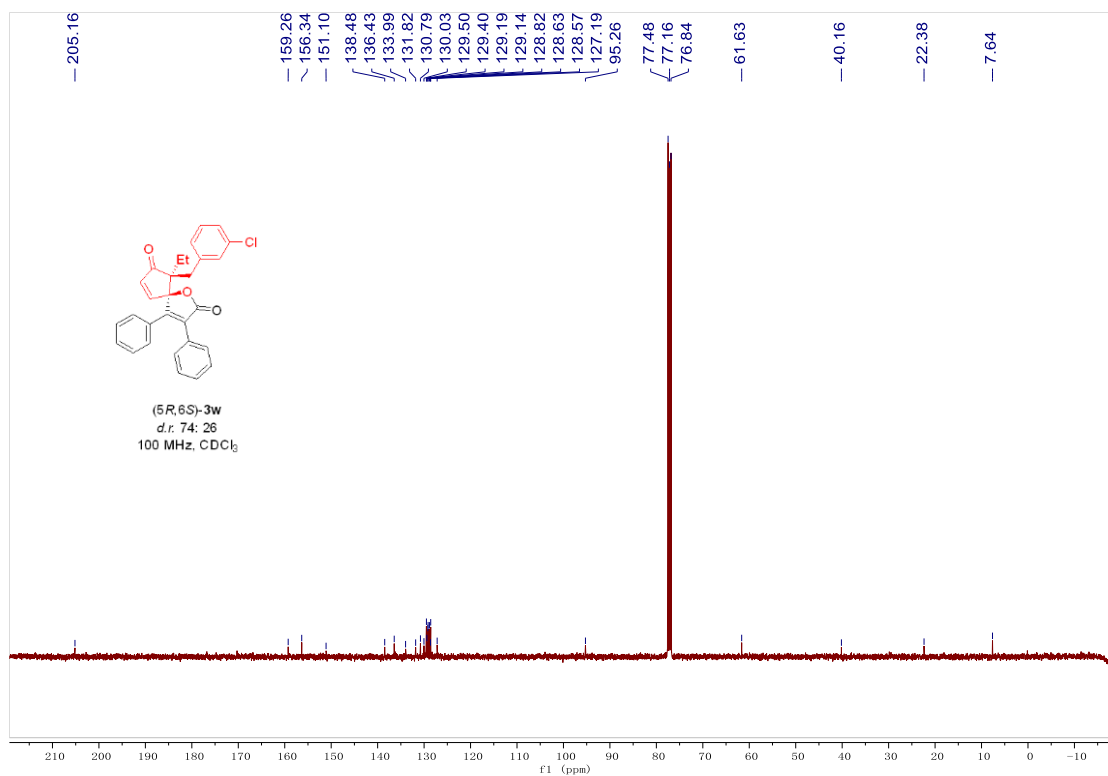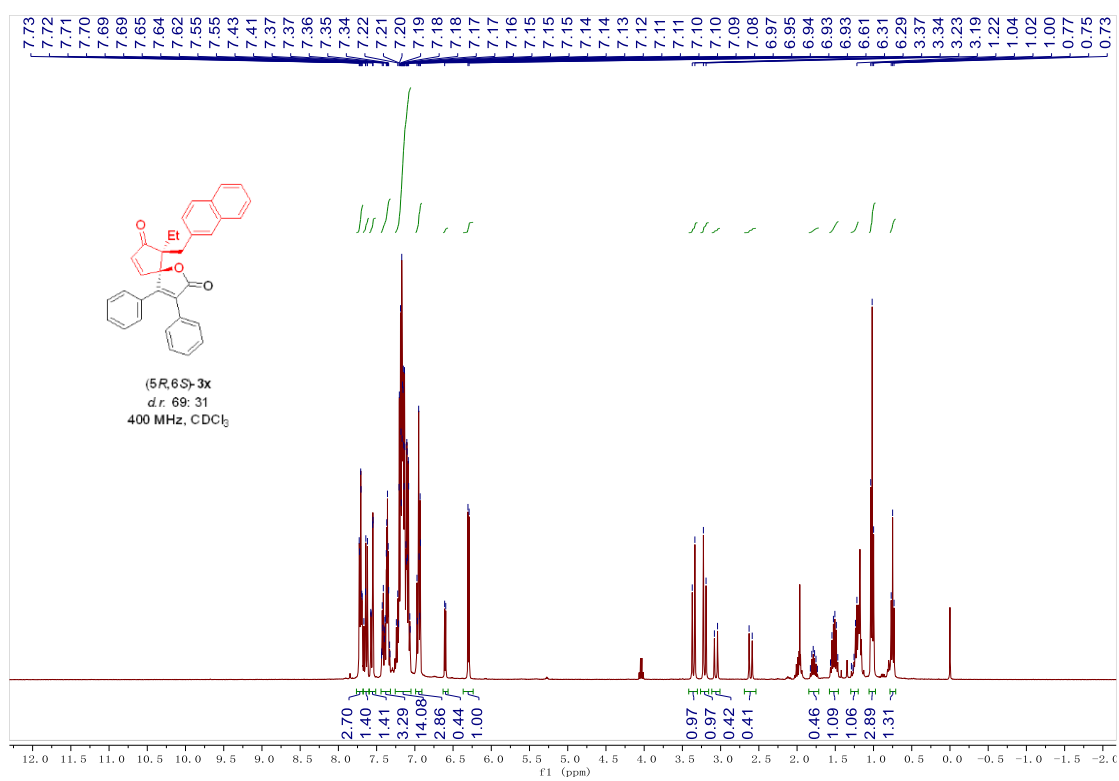

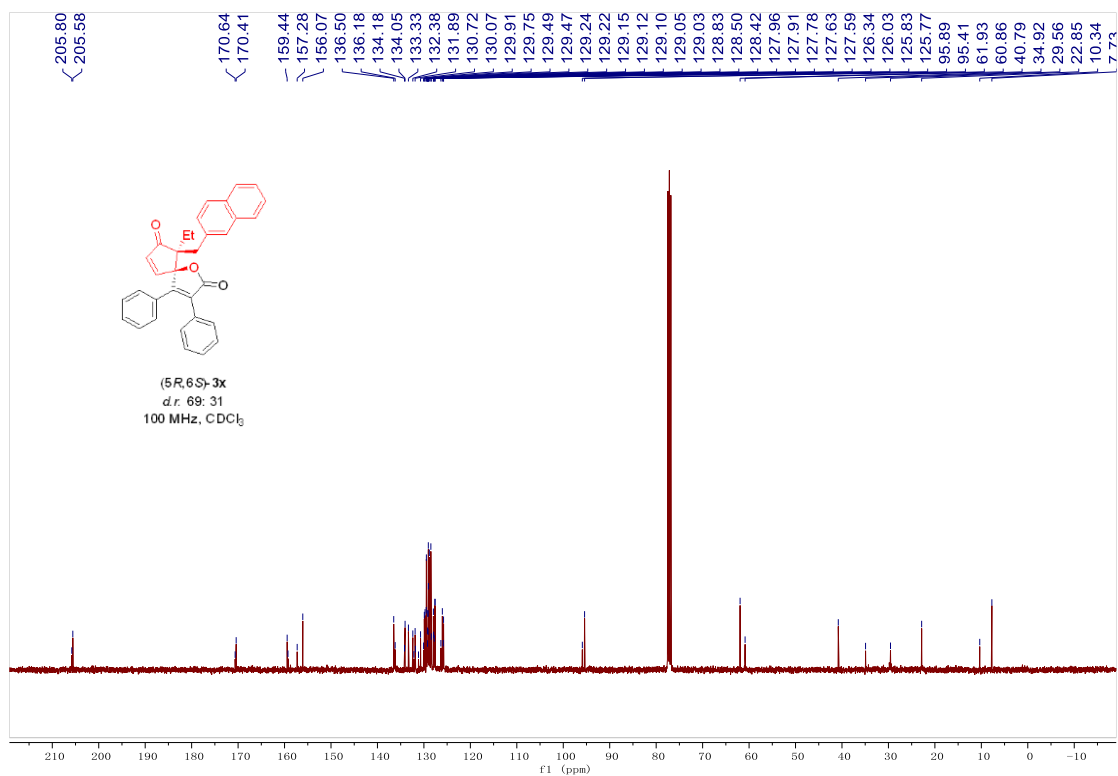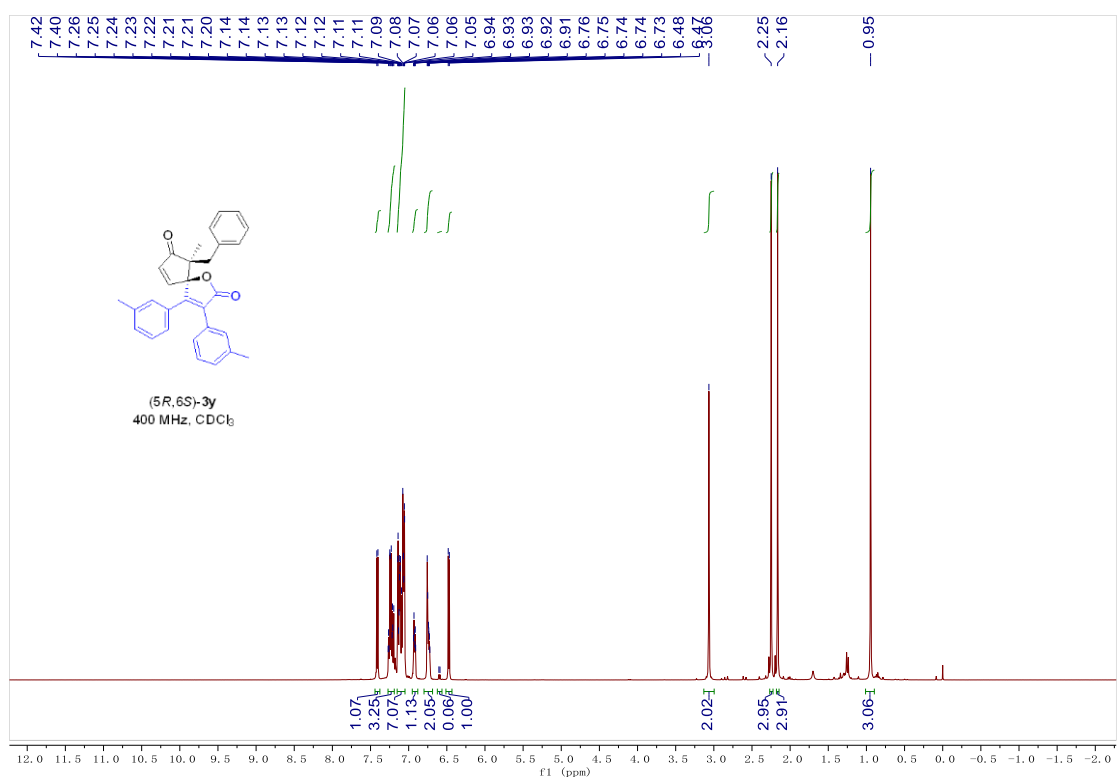

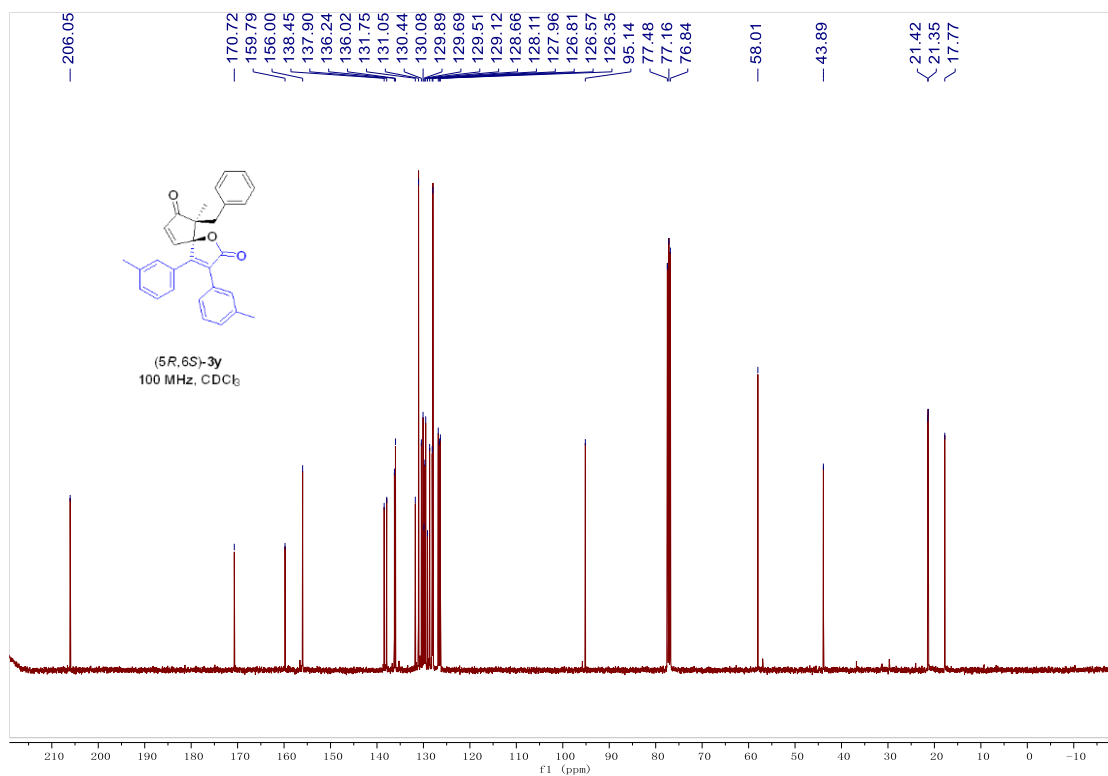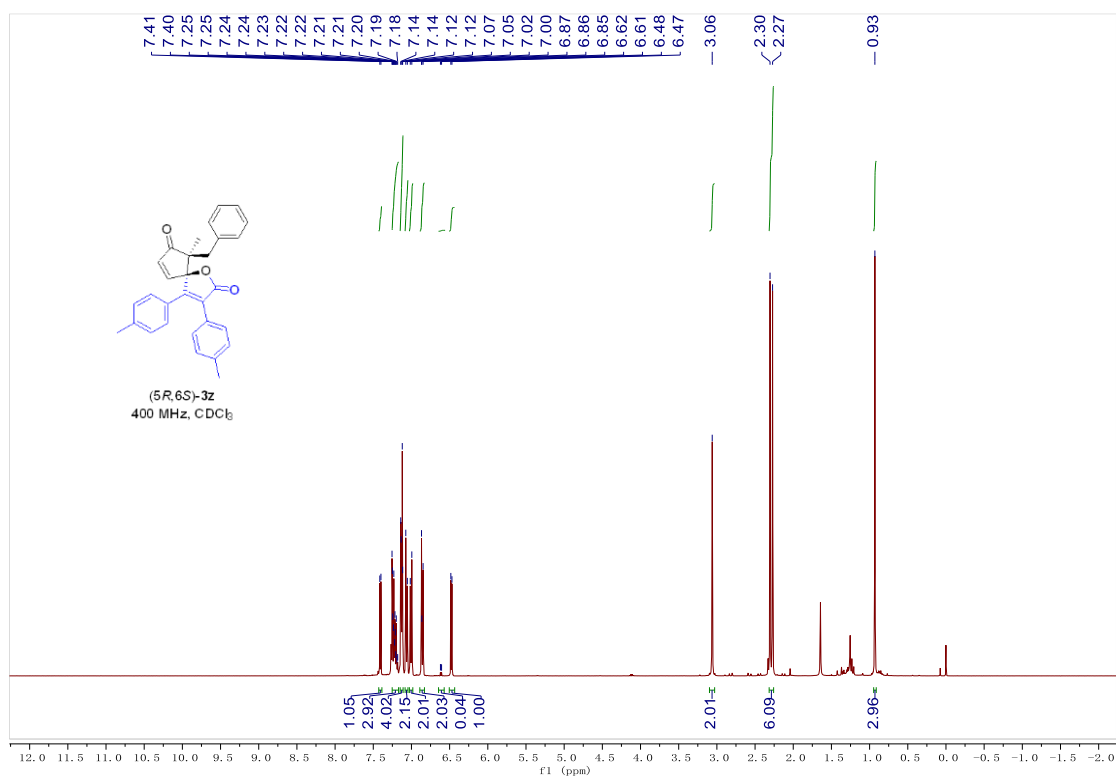



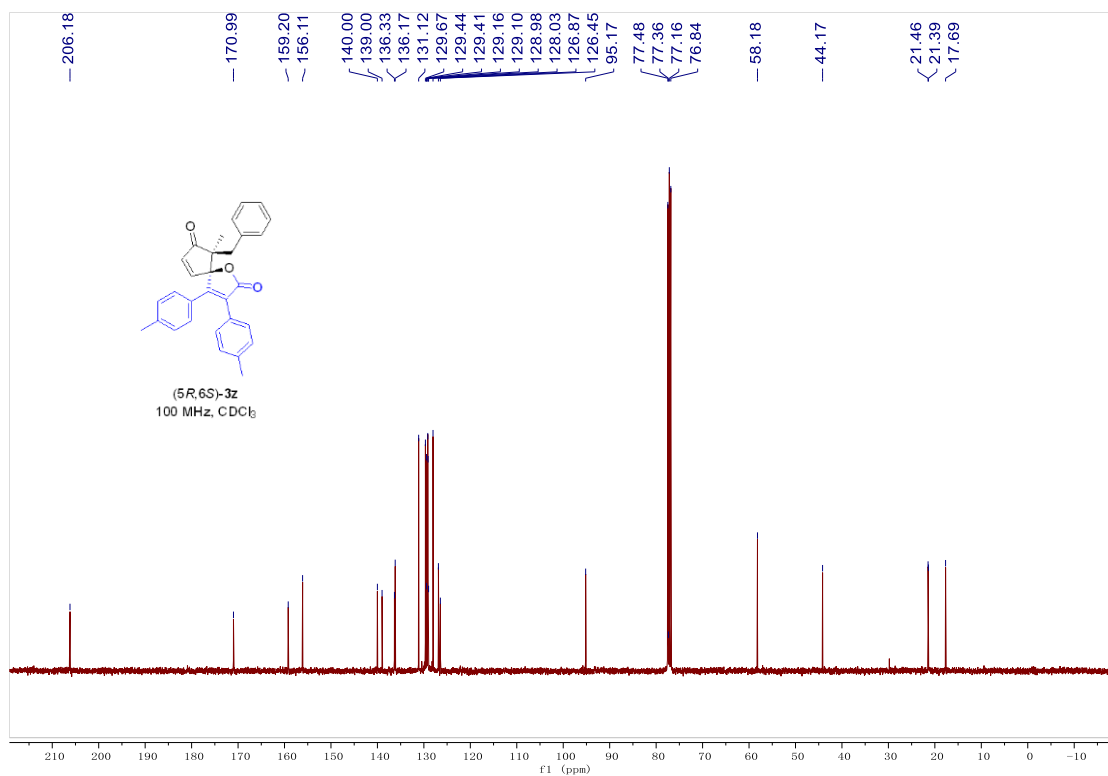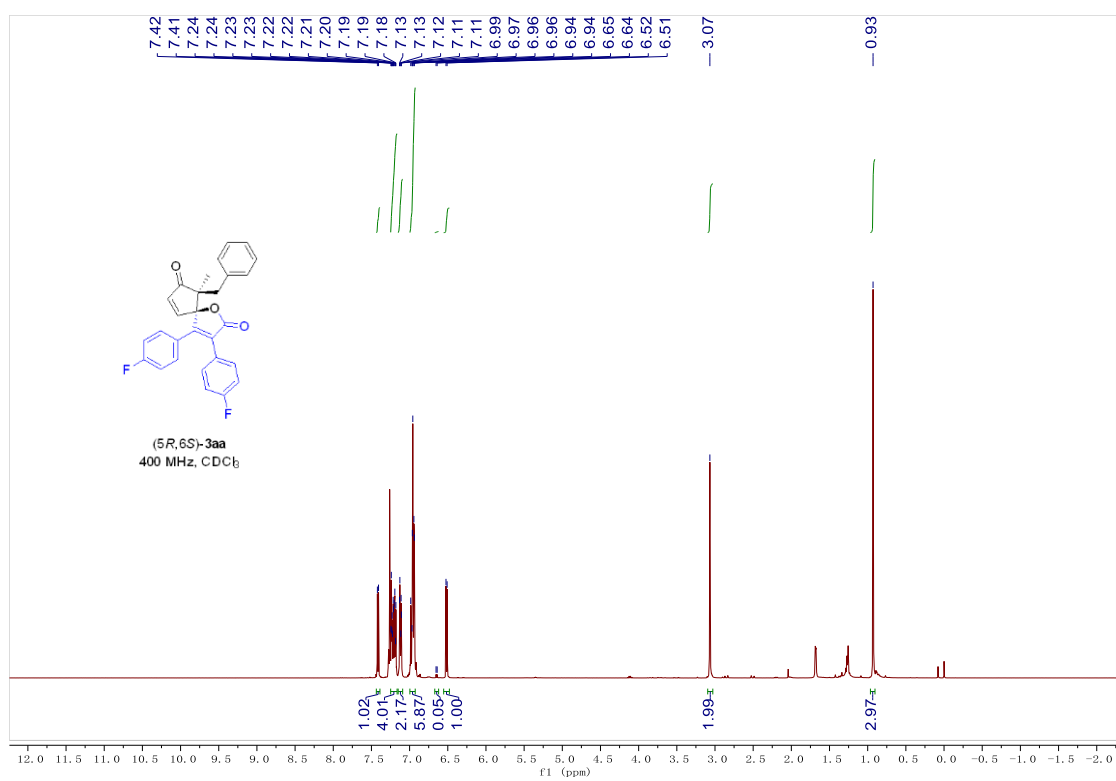

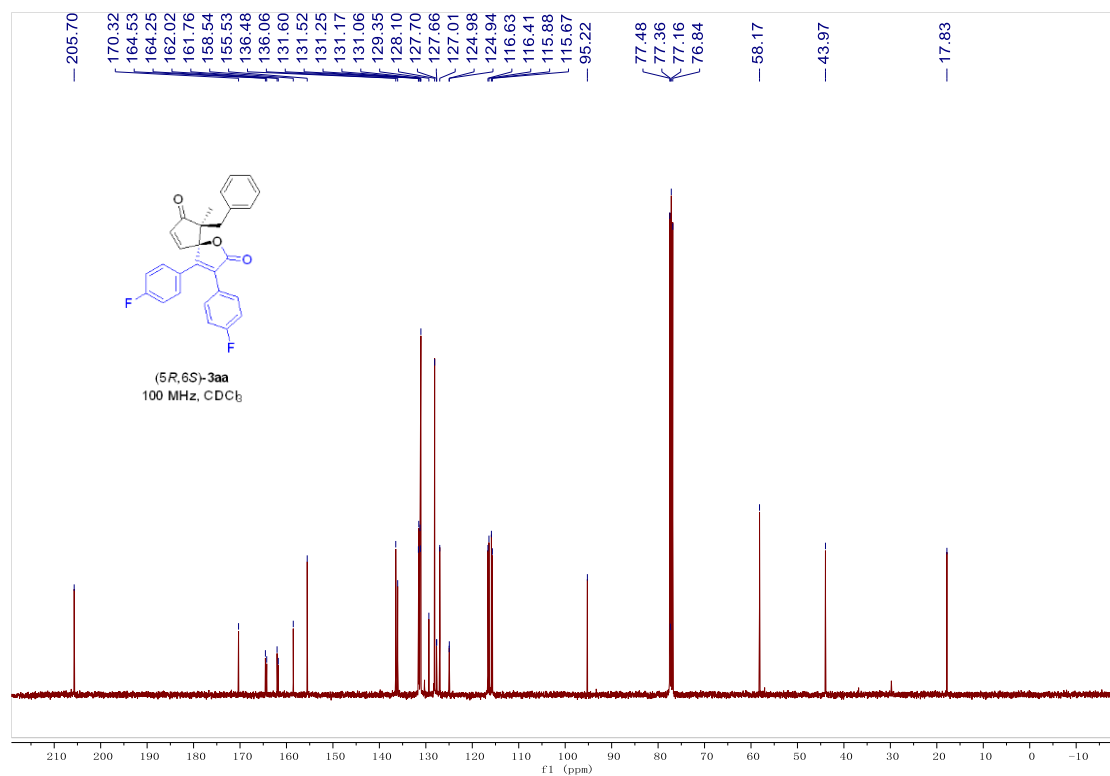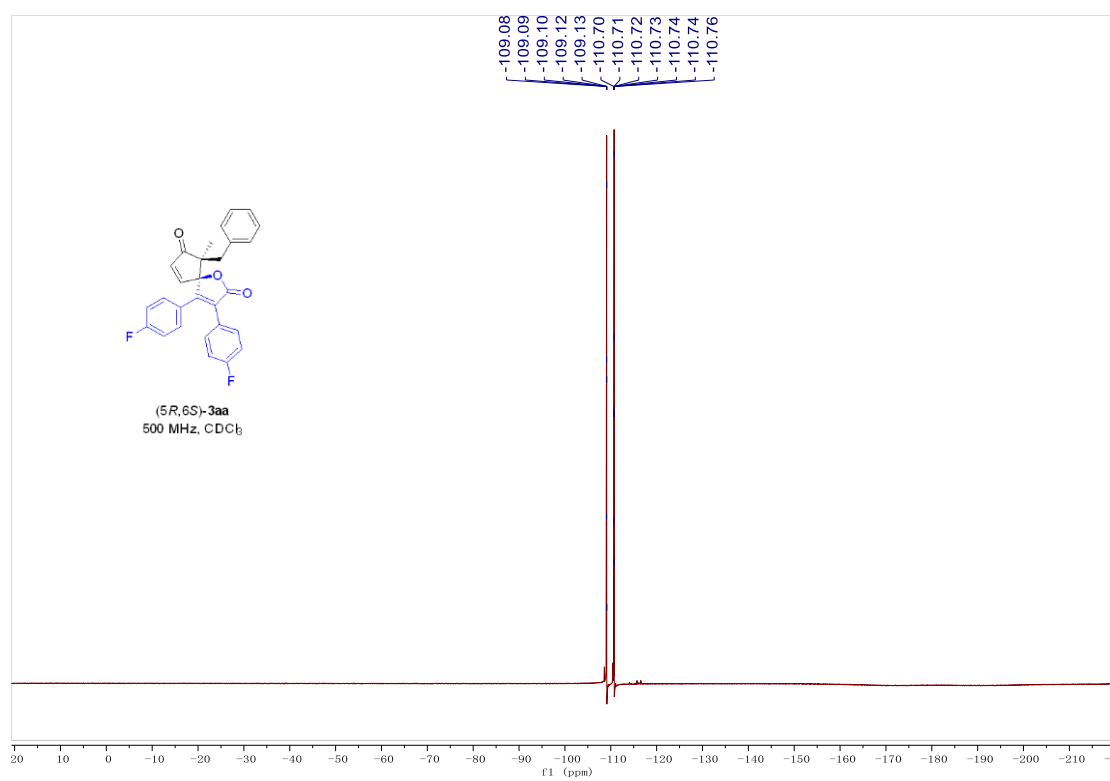

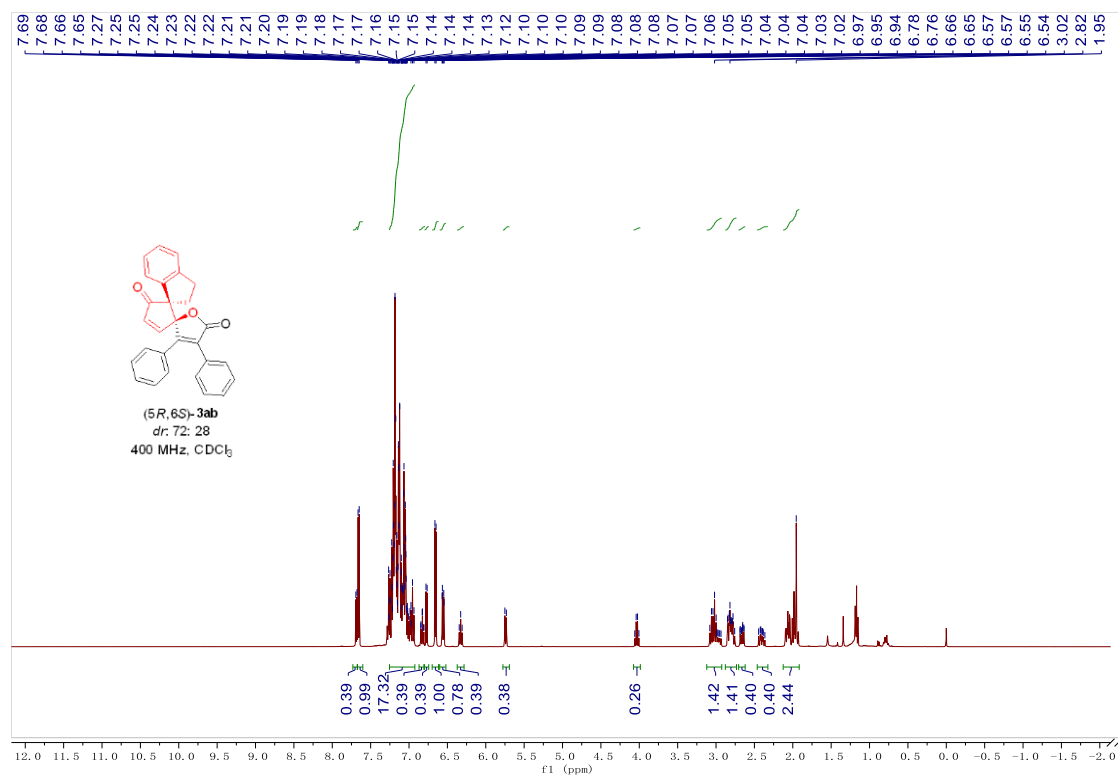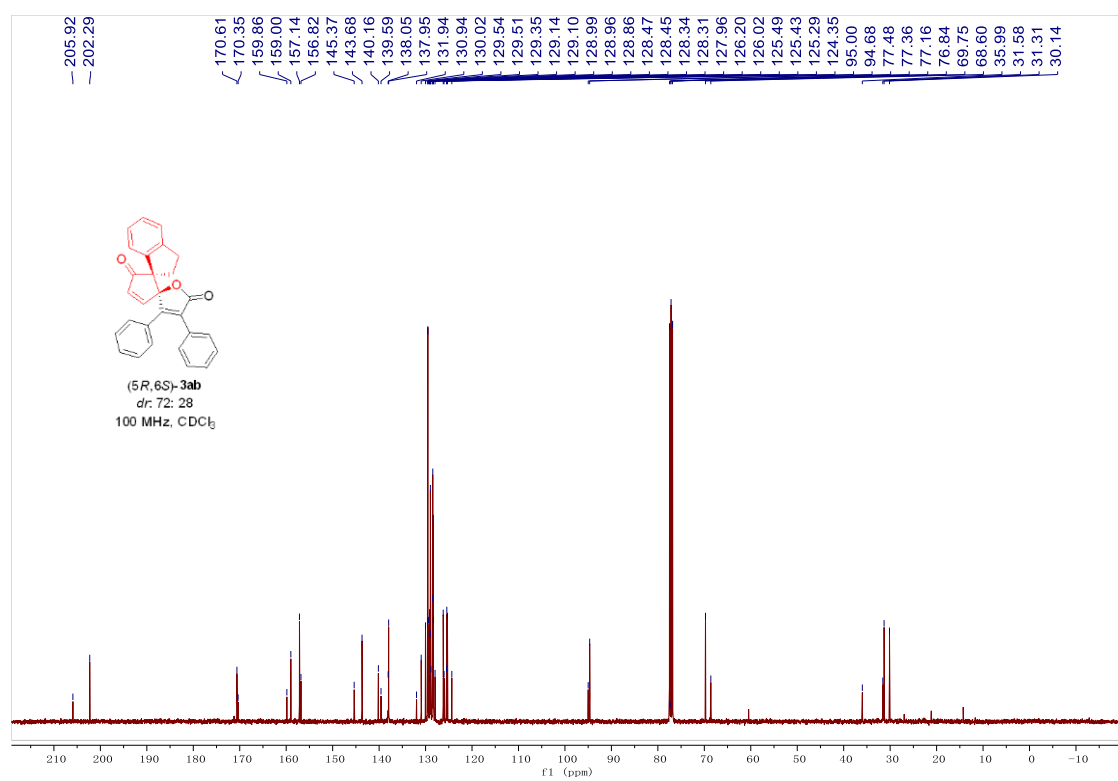

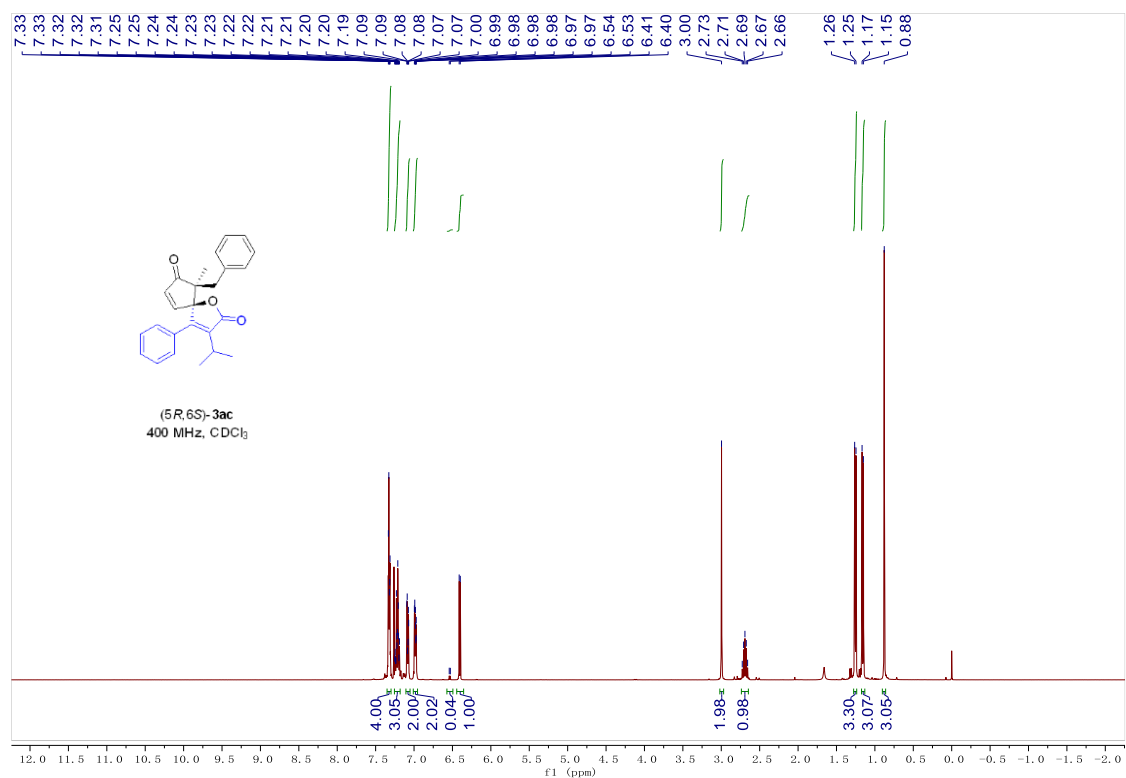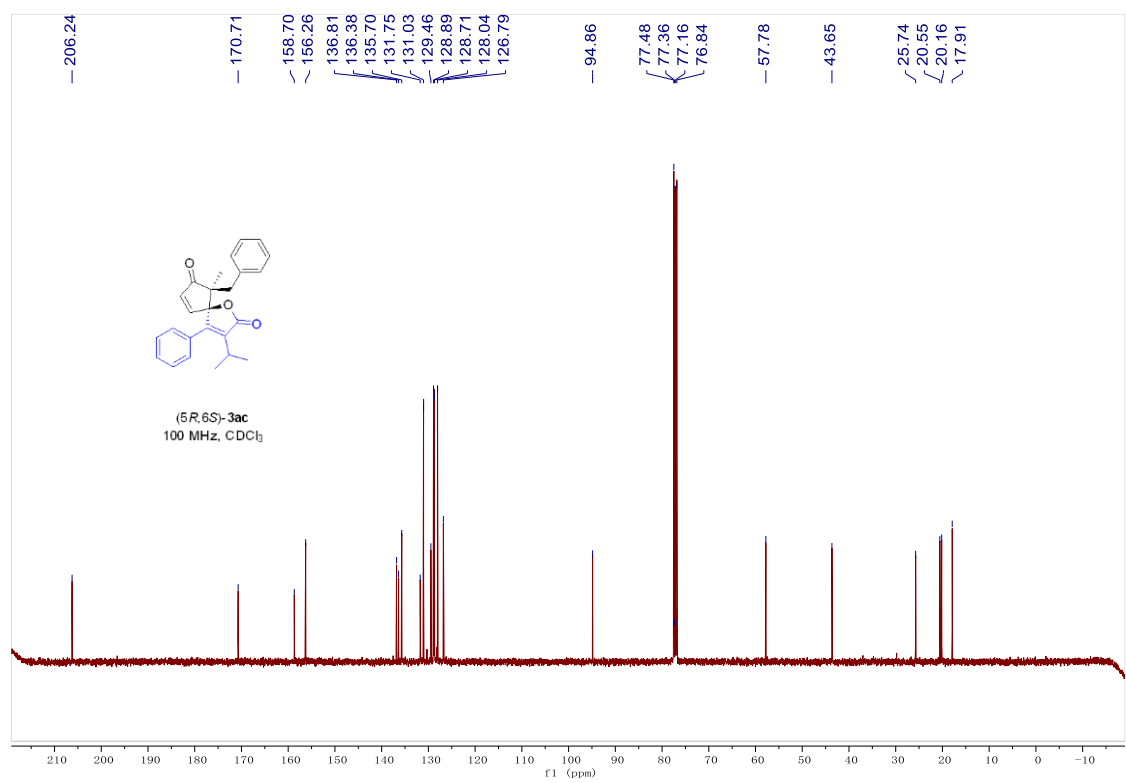

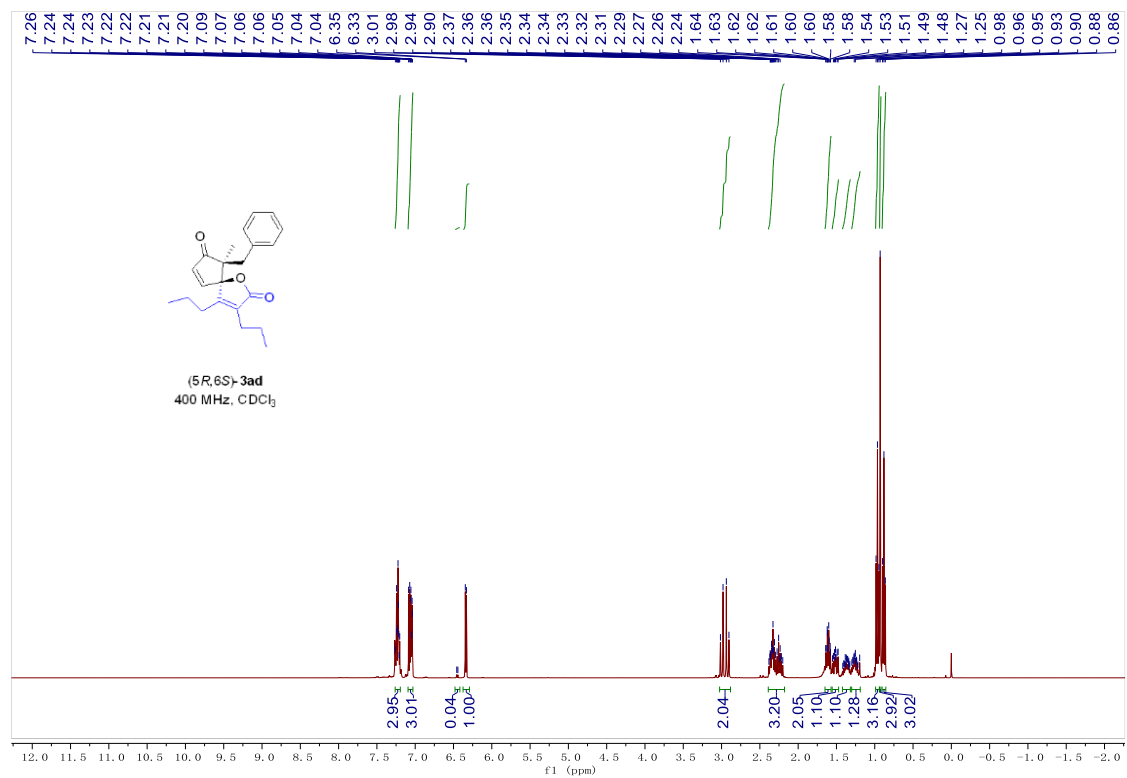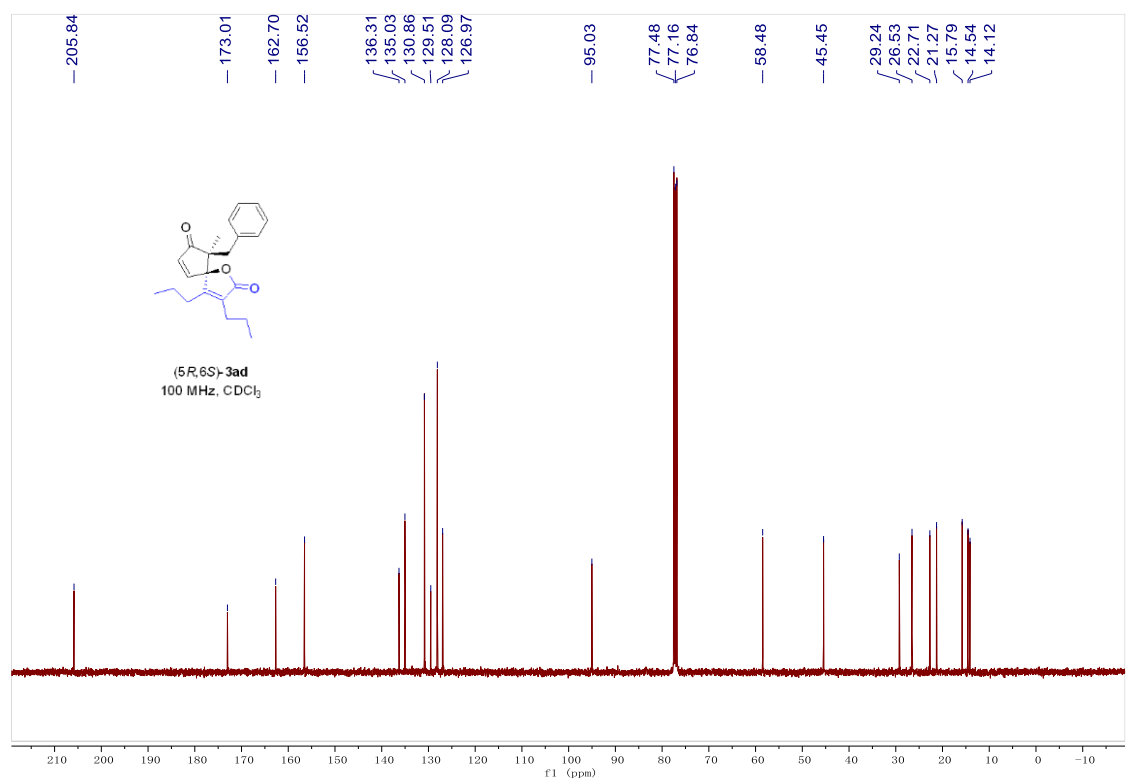

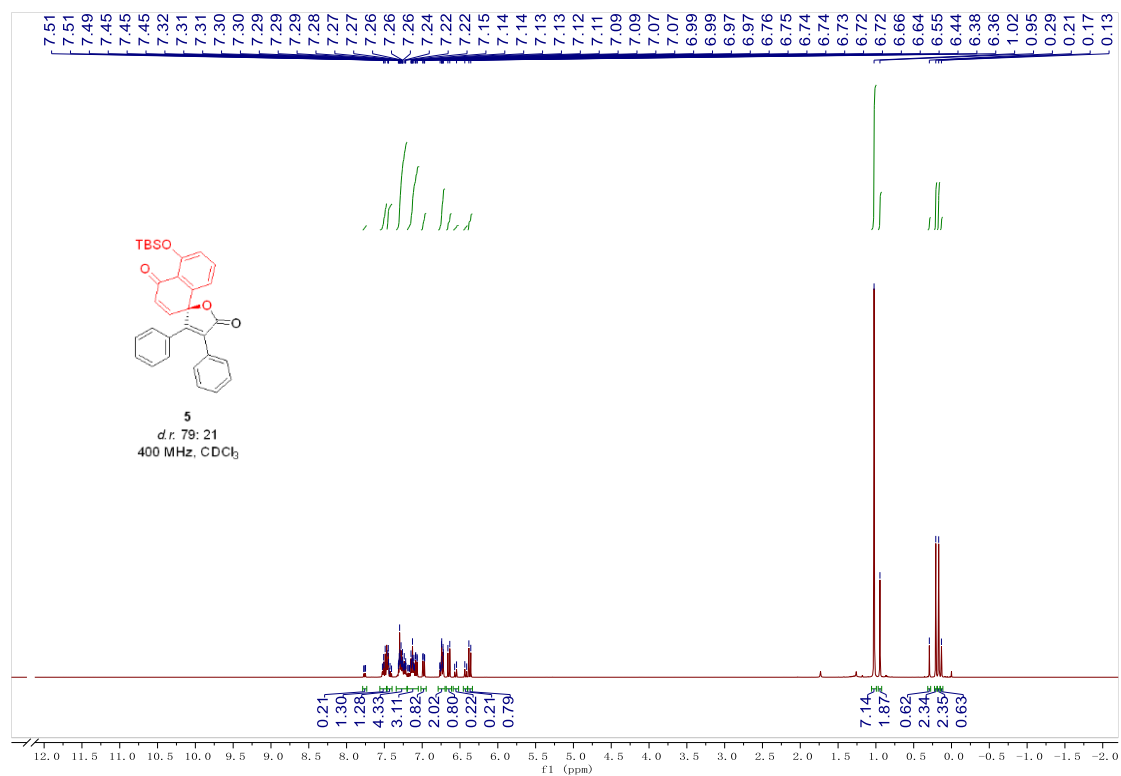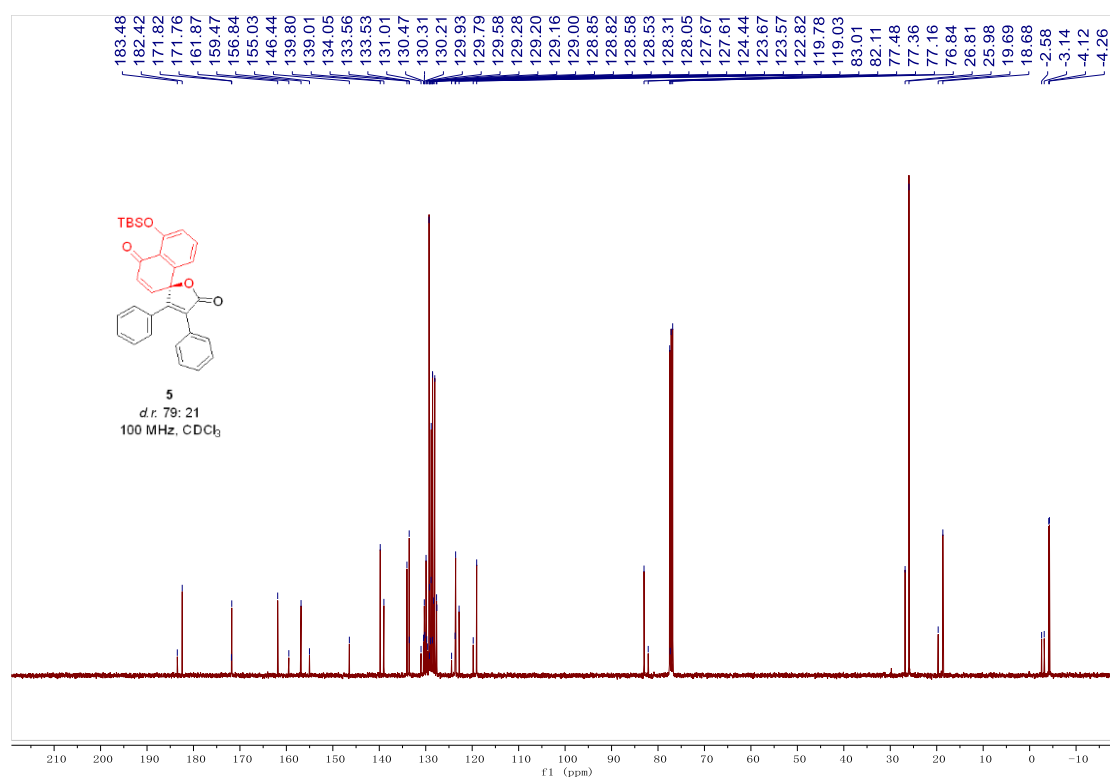

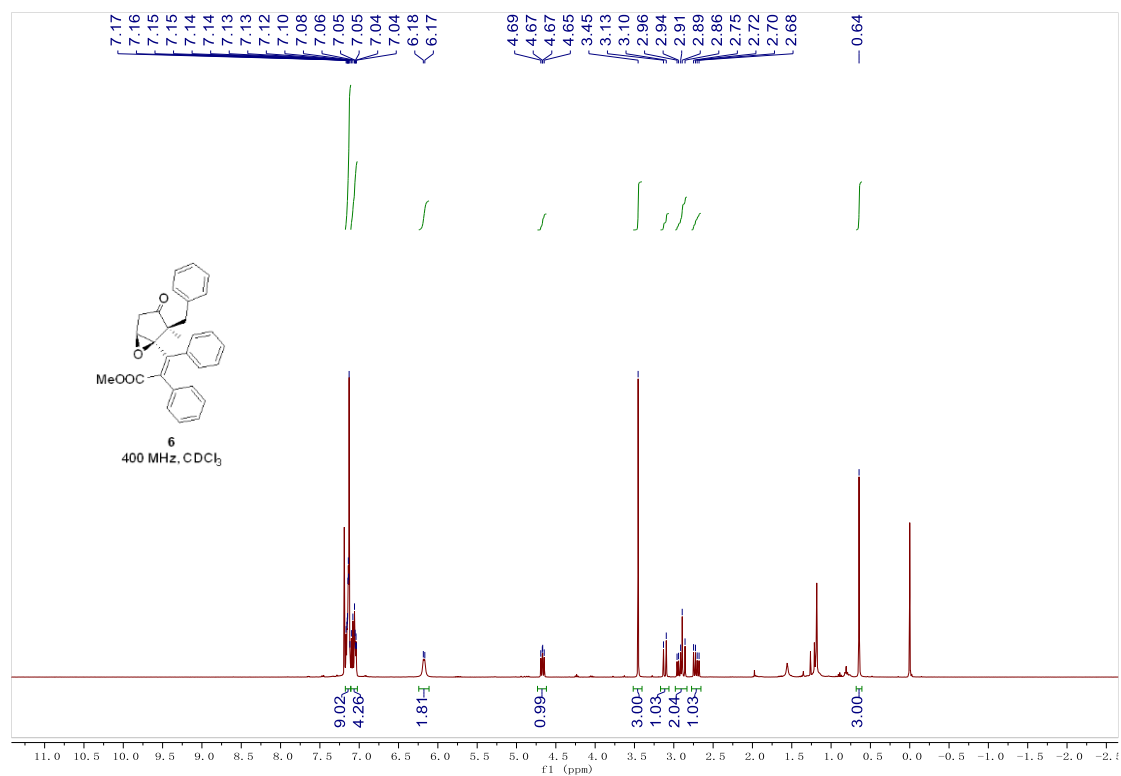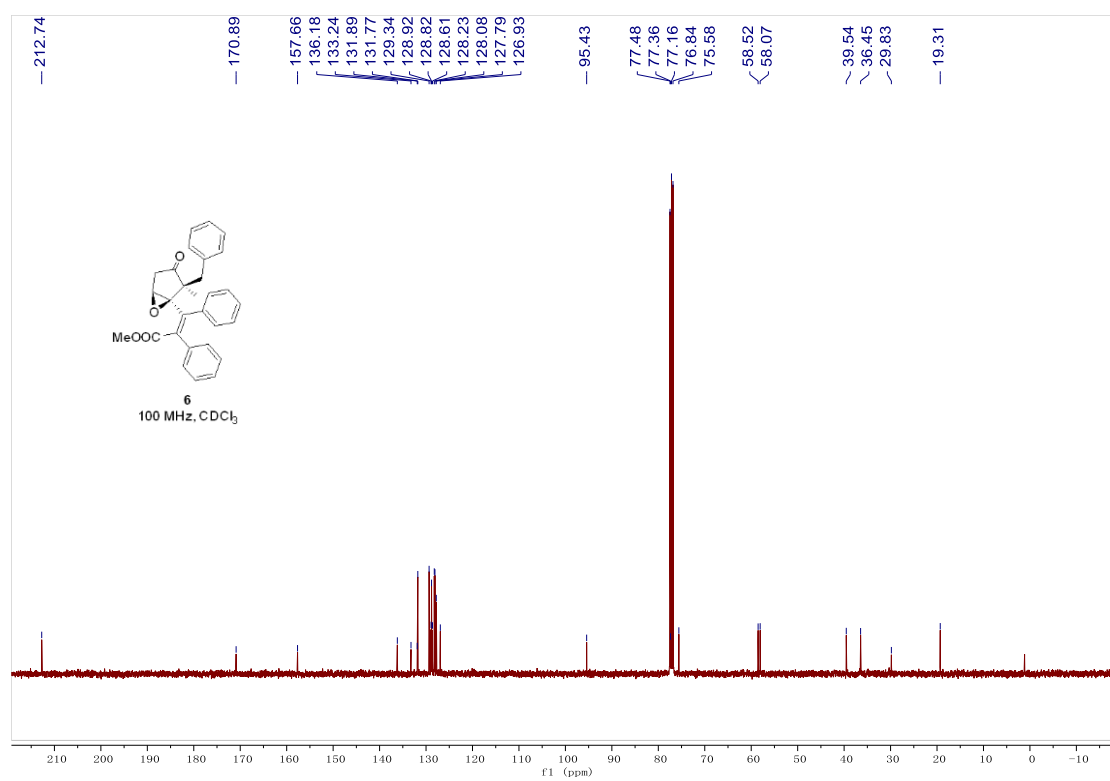

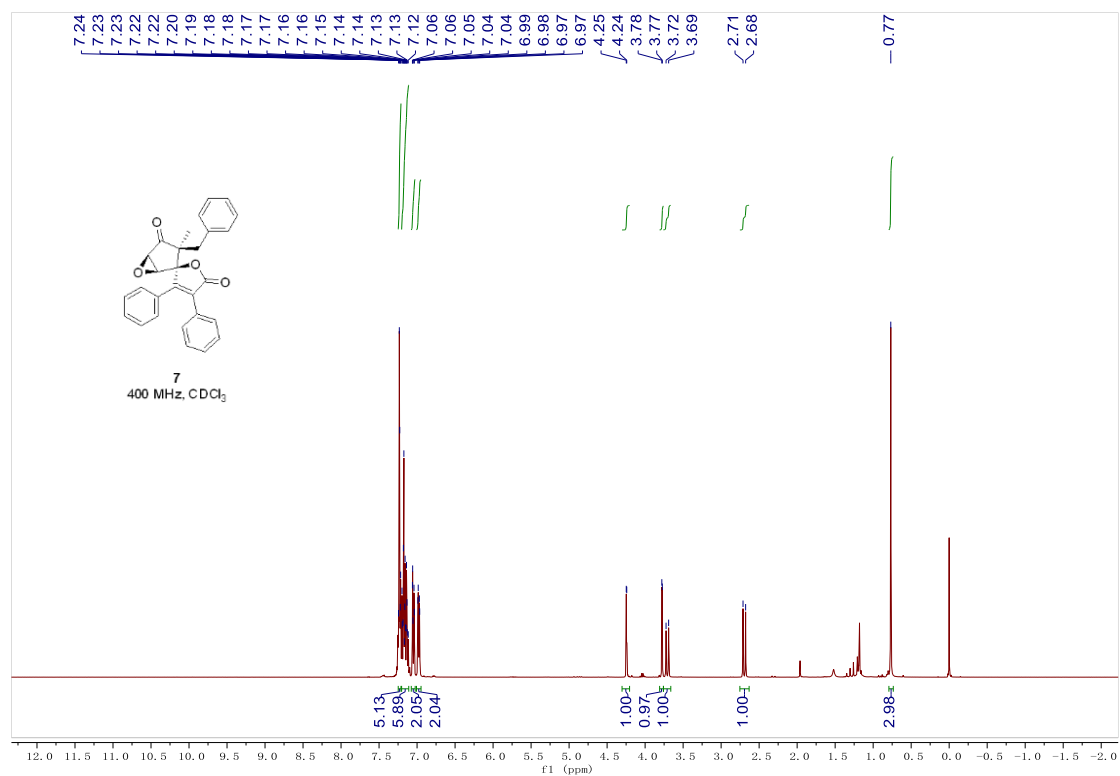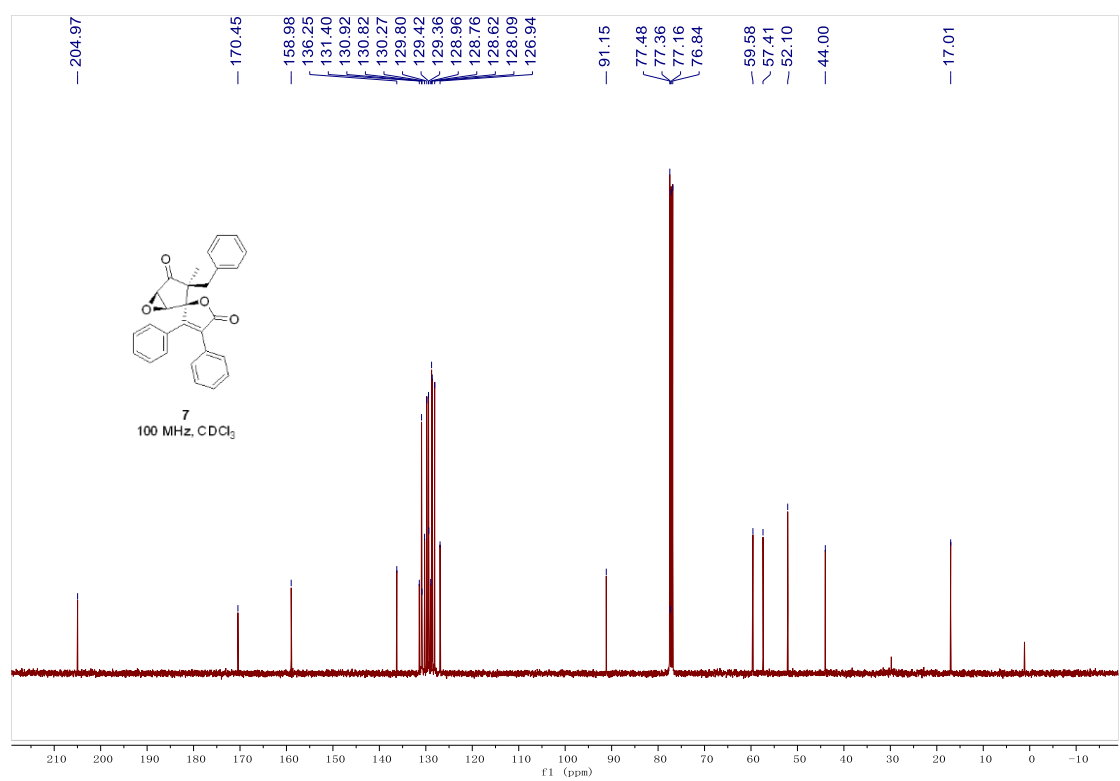



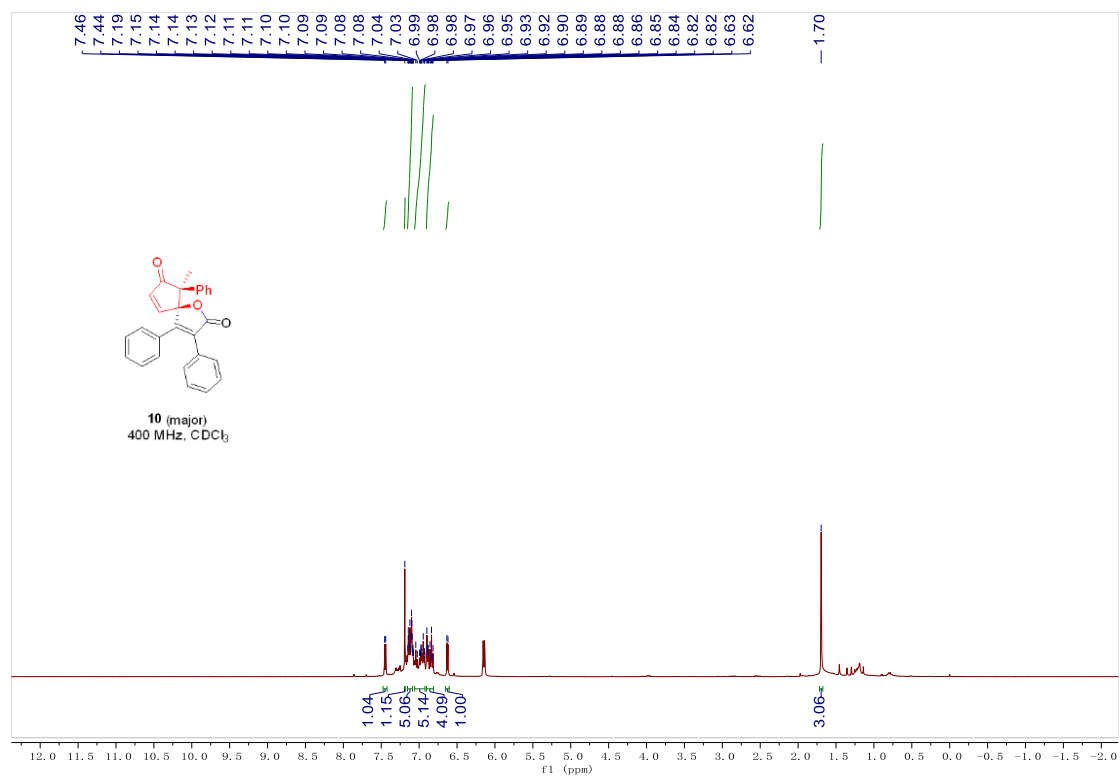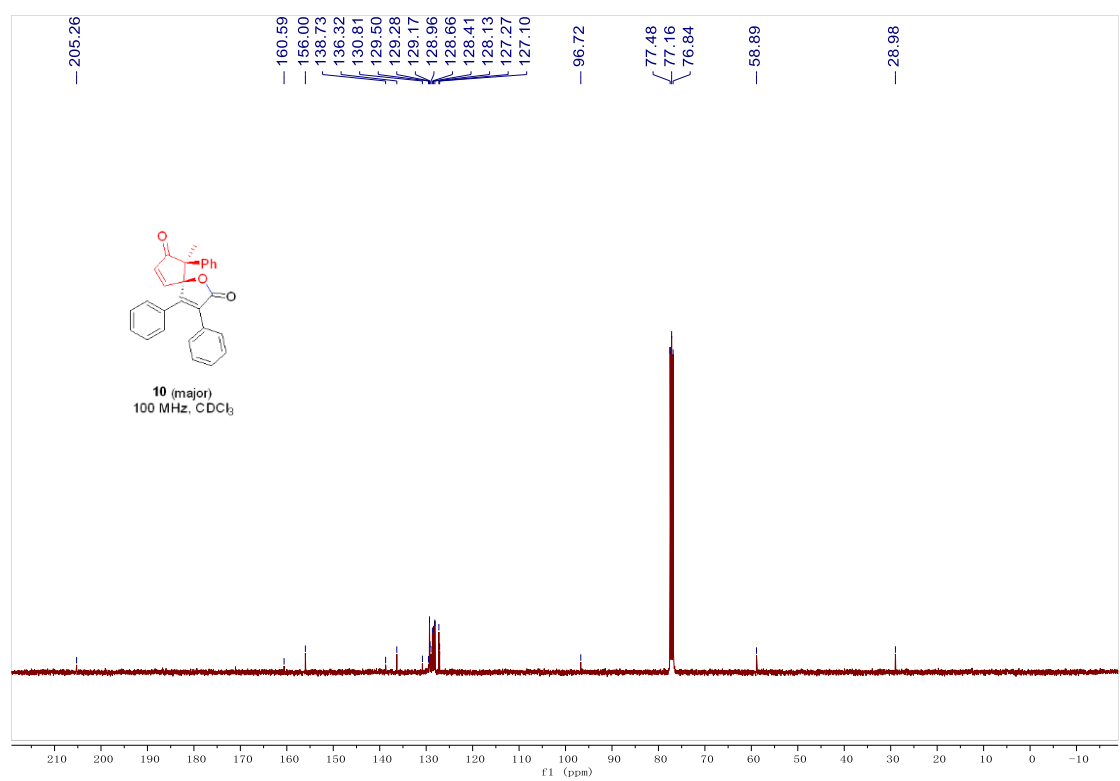

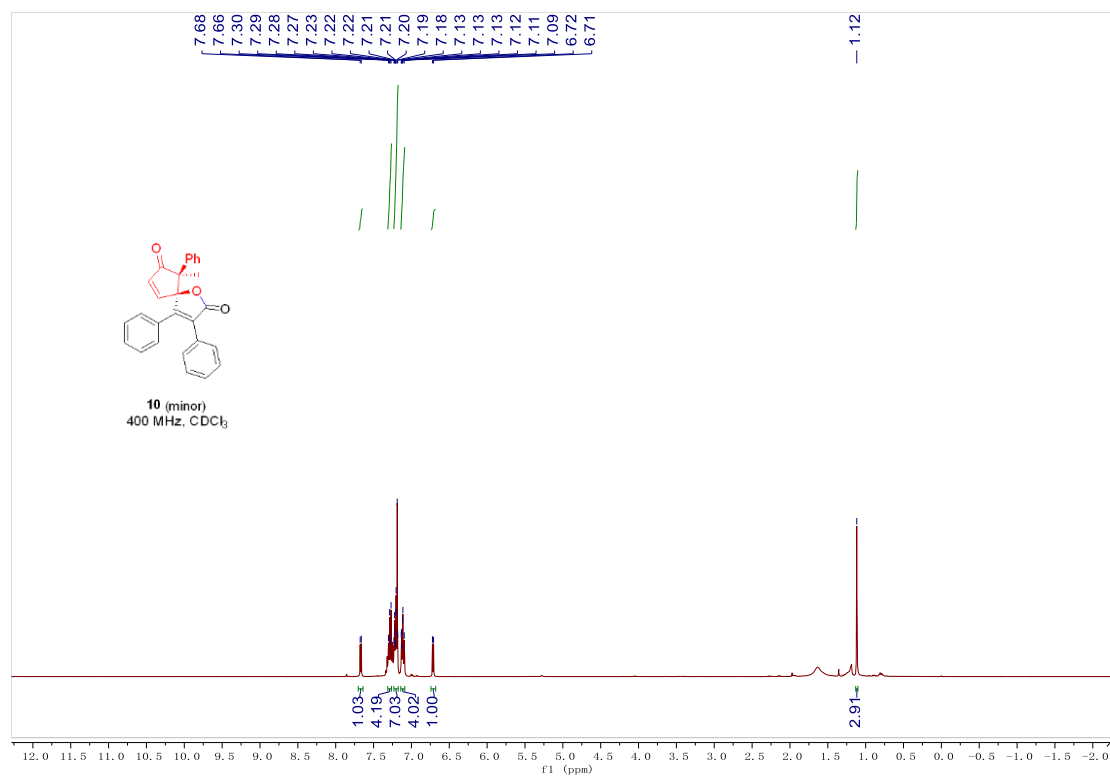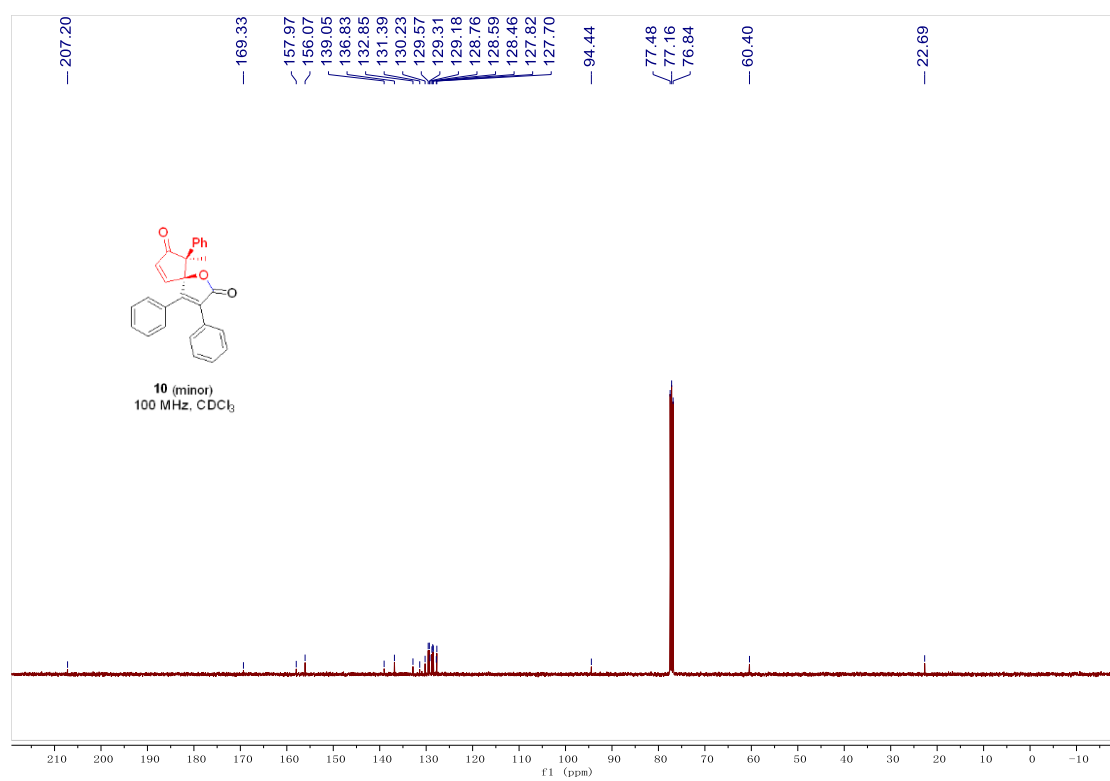

## 9. HPLC and UPLC Spectra

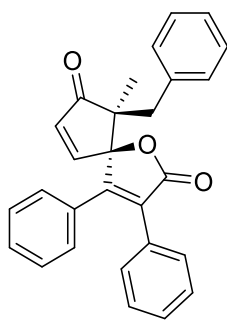

(5R,6S)-3a

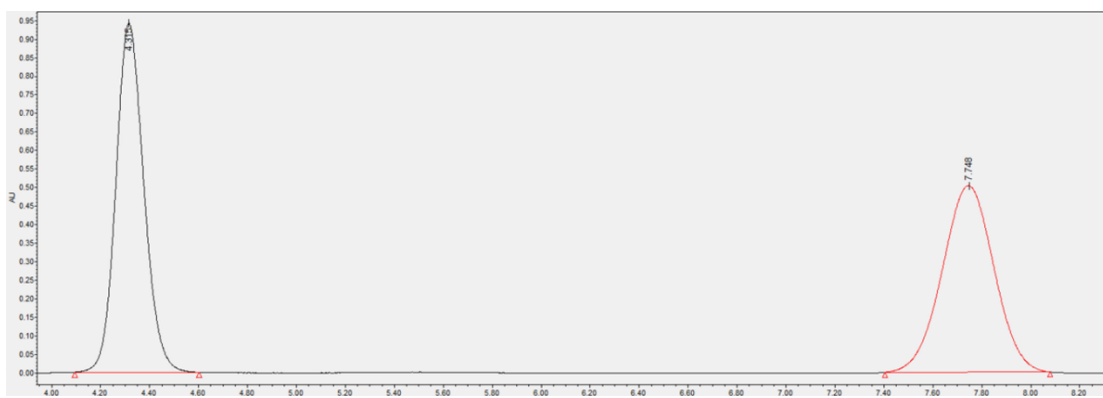

|   | Time/min | Area    | Height | Area% |
|---|----------|---------|--------|-------|
| 1 | 4.315    | 7477624 | 940299 | 50.34 |
| 2 | 7.748    | 7375894 | 502389 | 49.66 |

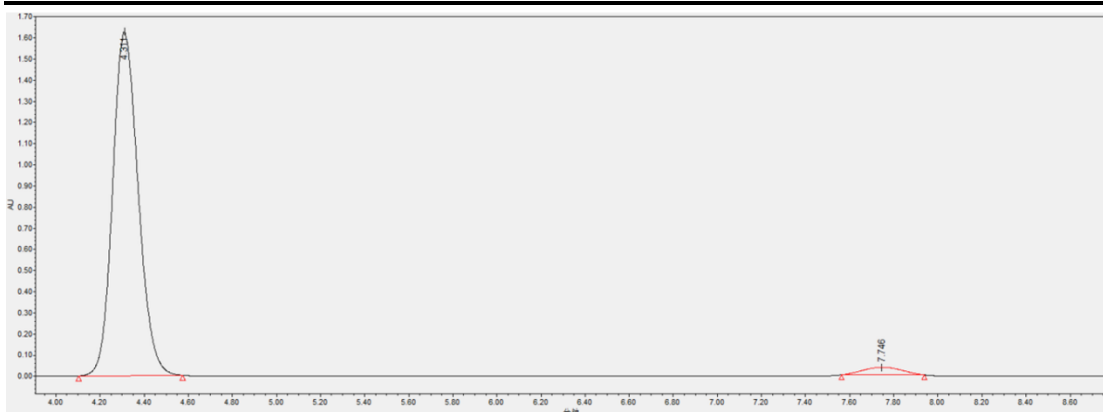

|   | Time/min | Area     | Height  | Area% |
|---|----------|----------|---------|-------|
| 1 | 4.311    | 13077387 | 1626997 | 96.76 |
| 2 | 7.746    | 437501   | 35985   | 3.24  |

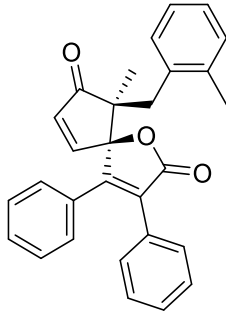

(5R,6S)-3b

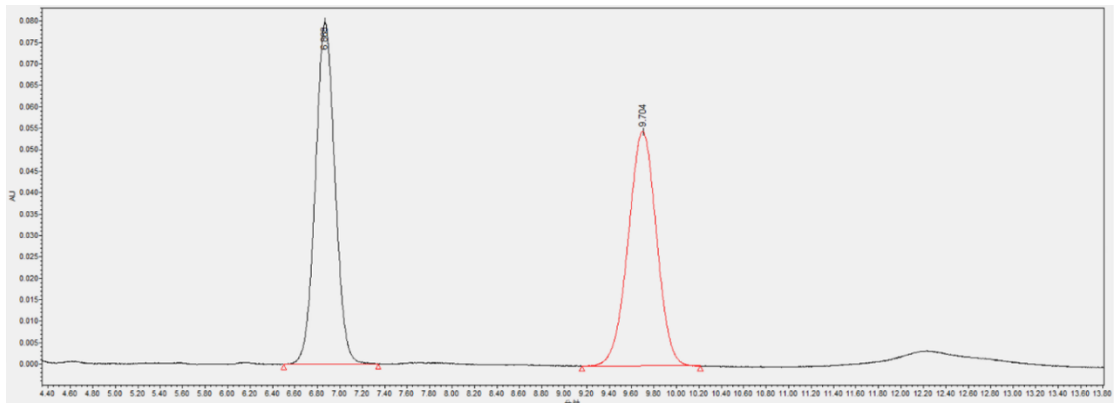

|   | Time/min | Area   | Height | Area% |
|---|----------|--------|--------|-------|
| 1 | 6.868    | 967677 | 79832  | 50.16 |
| 2 | 9.704    | 961531 | 54671  | 49.84 |

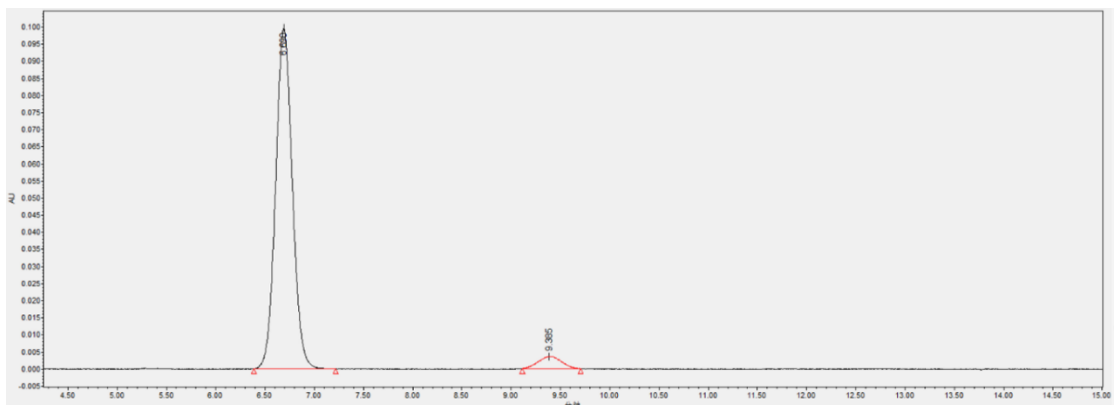

|   | Time/min | Area    | Height | Area% |
|---|----------|---------|--------|-------|
| 1 | 6.690    | 1173477 | 99556  | 95.42 |
| 2 | 9.385    | 56286   | 3539   | 4.58  |

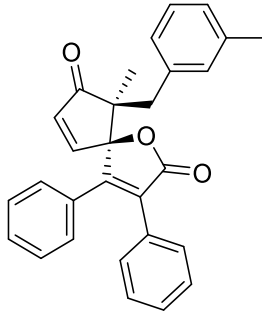

(5R,6S)-3c

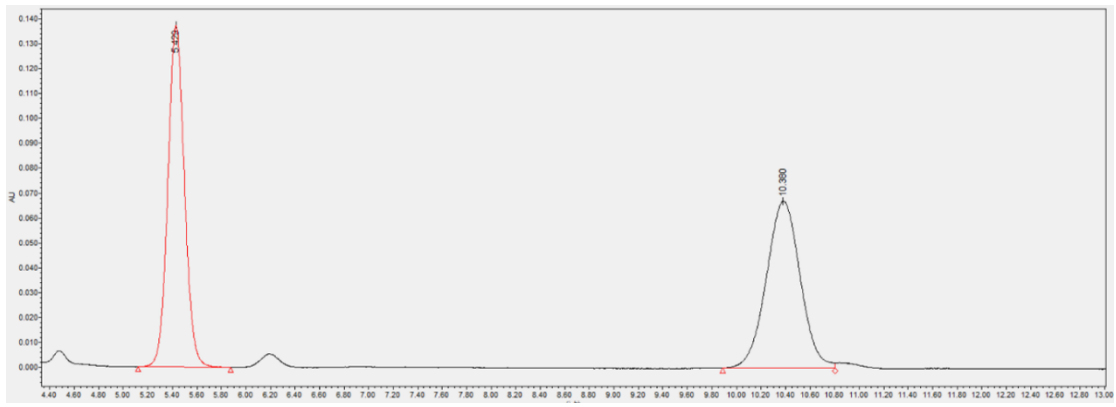

|   | Time/min | Area    | Height | Area% |
|---|----------|---------|--------|-------|
| 1 | 5.429    | 1288569 | 137190 | 50.00 |
| 2 | 10.380   | 1288477 | 67064  | 50.00 |

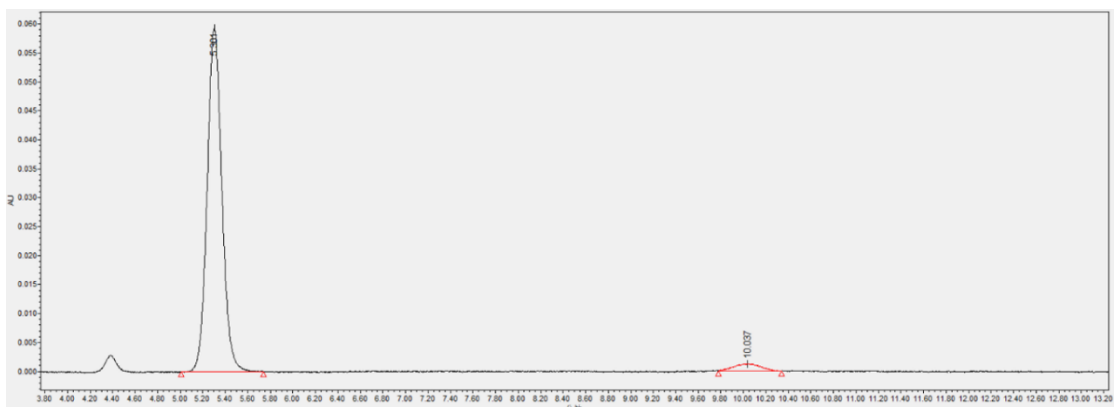

|   | Time/min | Area   | Height | Area% |
|---|----------|--------|--------|-------|
| 1 | 5.301    | 539364 | 59331  | 96.34 |
| 2 | 10.037   | 20475  | 1265   | 3.66  |

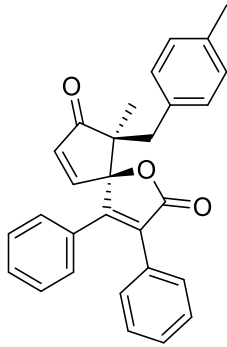

(5R,6S)-3d

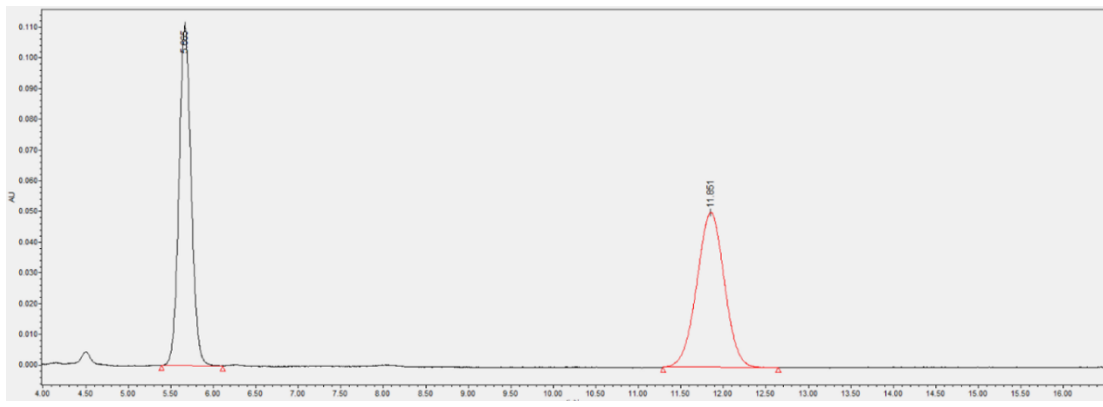

|   | Time/min | Area    | Height | Area% |
|---|----------|---------|--------|-------|
| 1 | 5.665    | 1102053 | 110646 | 49.21 |
| 2 | 11.851   | 1137628 | 50418  | 50.79 |

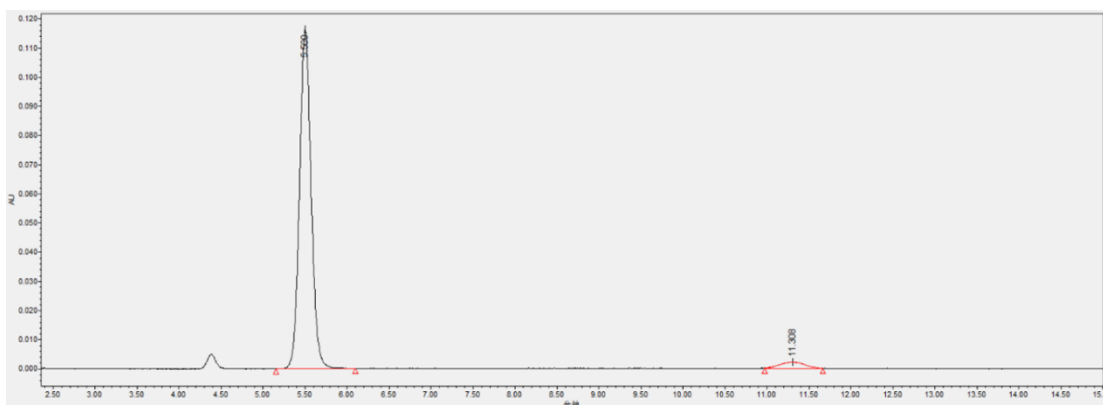

|   | Time/min | Area    | Height | Area% |
|---|----------|---------|--------|-------|
| 1 | 5.500    | 1115086 | 116239 | 96.43 |
| 2 | 11.308   | 41241   | 2164   | 3.57  |

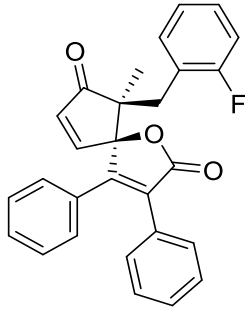

(5R,6S)-3e

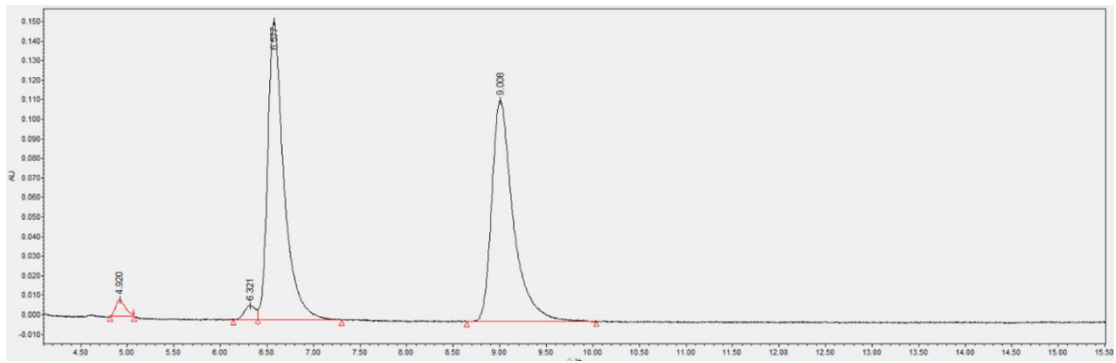

|   | Time/min | Area    | Height | Area% |
|---|----------|---------|--------|-------|
| 1 | 4.920    | 63728   | 8578   | 1.68  |
| 2 | 6.321    | 62660   | 7397   | 1.65  |
| 3 | 6.577    | 1846742 | 152547 | 48.69 |
| 4 | 9.008    | 1819604 | 113194 | 47.98 |

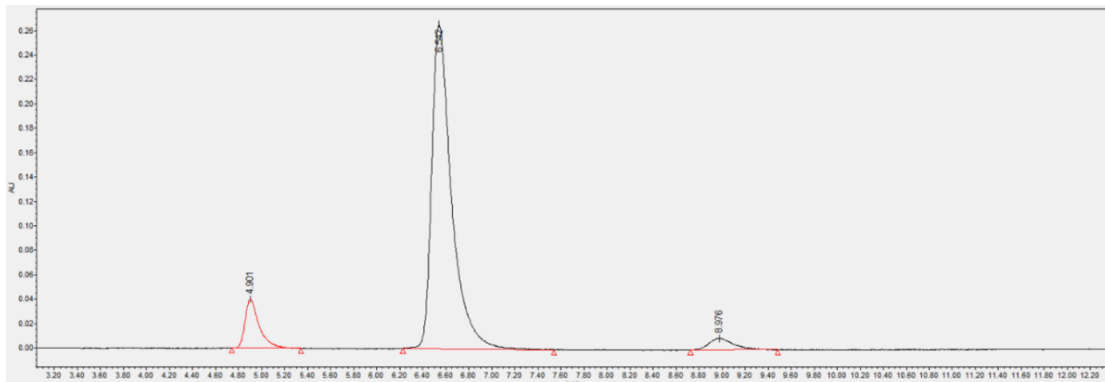

|   | Time/min | Area    | Height | Area% |
|---|----------|---------|--------|-------|
| 1 | 4.901    | 336030  | 40138  | 9.19  |
| 2 | 6.542    | 3181259 | 265428 | 86.98 |
| 3 | 8.976    | 139966  | 9546   | 3.83  |

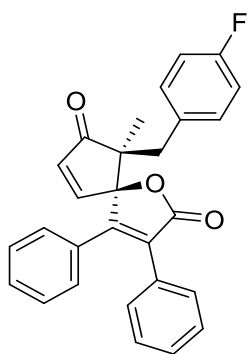

(5R,6S)-3f

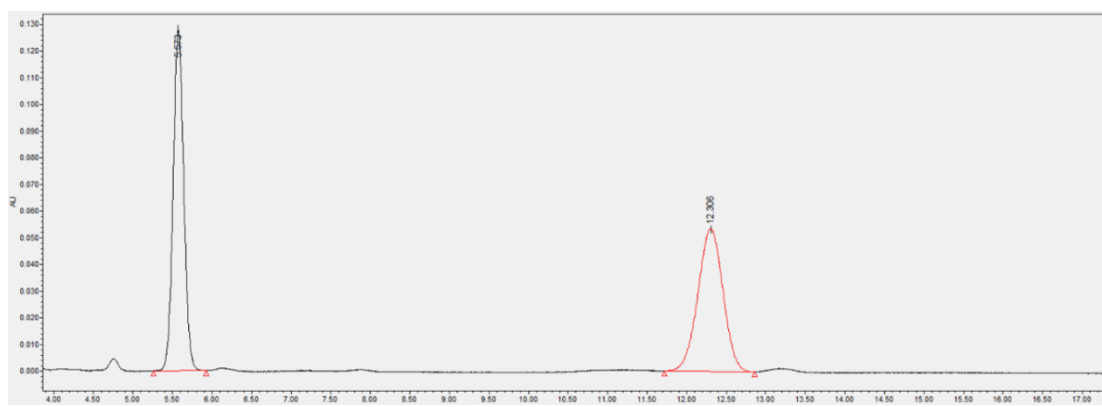

|   | Time/min | Area    | Height | Area% |
|---|----------|---------|--------|-------|
| 1 | 5.573    | 1192700 | 127985 | 50.32 |
| 2 | 12.306   | 1177380 | 53418  | 49.68 |

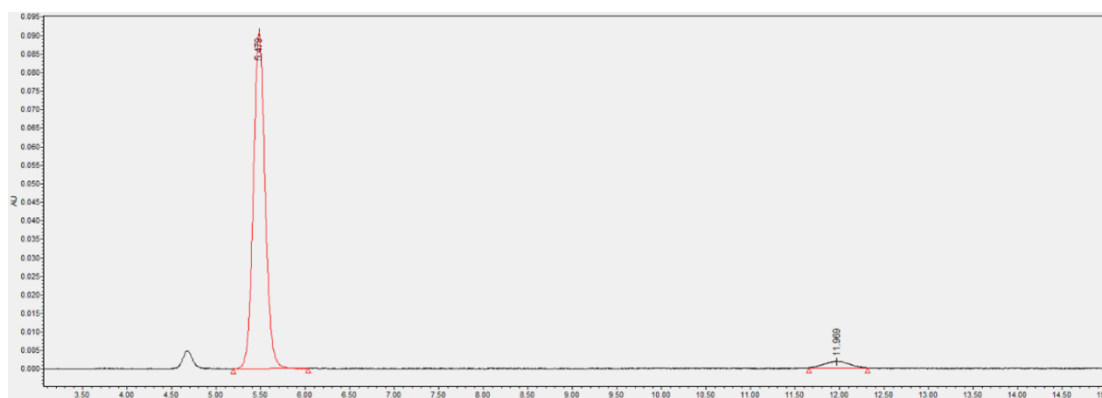

|   | Time/min | Area   | Height | Area% |
|---|----------|--------|--------|-------|
| 1 | 5.479    | 831456 | 90556  | 95.99 |
| 2 | 11.969   | 34713  | 1823   | 4.01  |



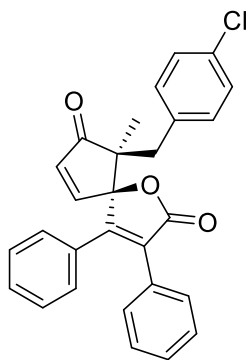

**(5R,6S)-3g**

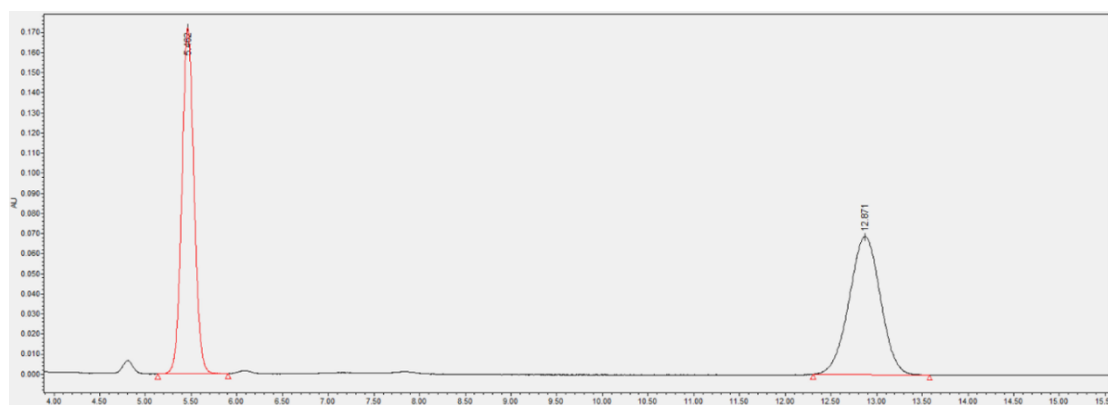

|   | Time/min | Area    | Height | Area% |
|---|----------|---------|--------|-------|
| 1 | 5.462    | 1594435 | 172094 | 49.33 |
| 2 | 12.871   | 1637541 | 68738  | 50.67 |

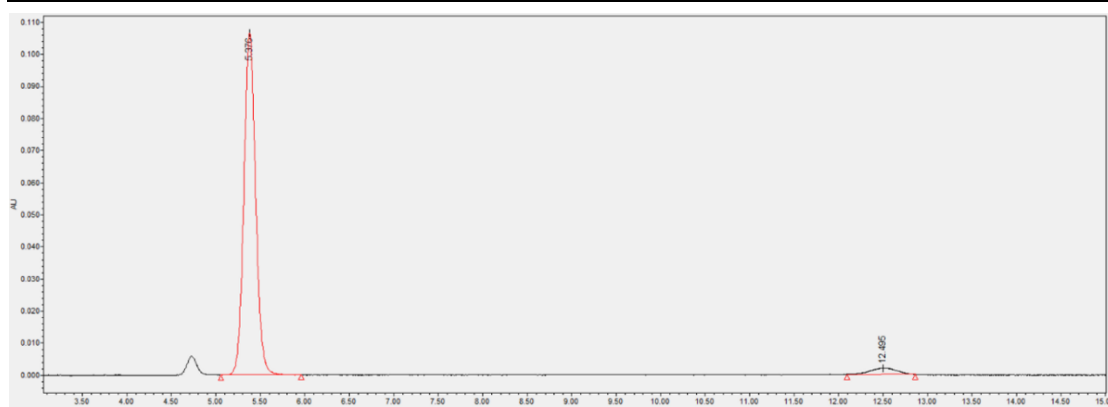

|   | Time/min | Area   | Height | Area% |
|---|----------|--------|--------|-------|
| 1 | 5.376    | 973930 | 106471 | 96.07 |
| 2 | 12.495   | 39849  | 1929   | 3.93  |

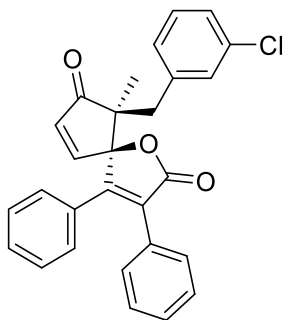

(5R,6S)-3h

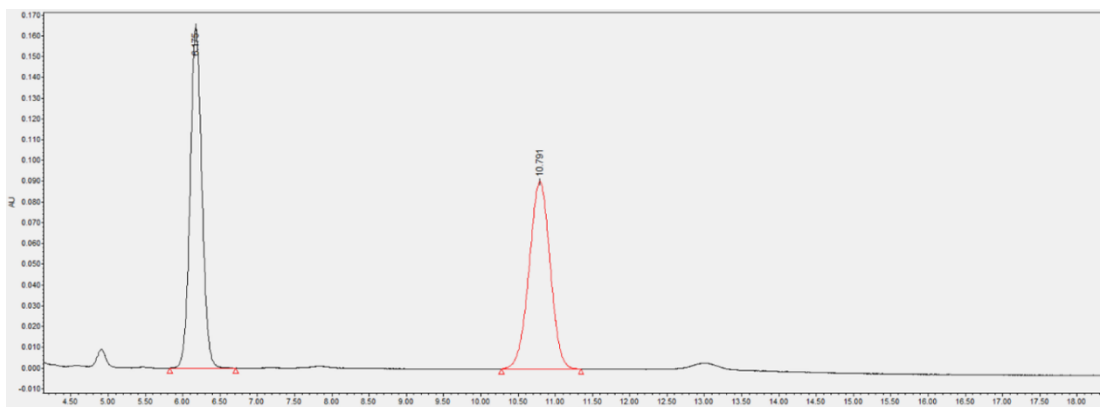

|   | Time/min | Area    | Height | Area% |
|---|----------|---------|--------|-------|
| 1 | 6.175    | 1794787 | 163876 | 50.39 |
| 2 | 10.791   | 1767333 | 90228  | 49.61 |

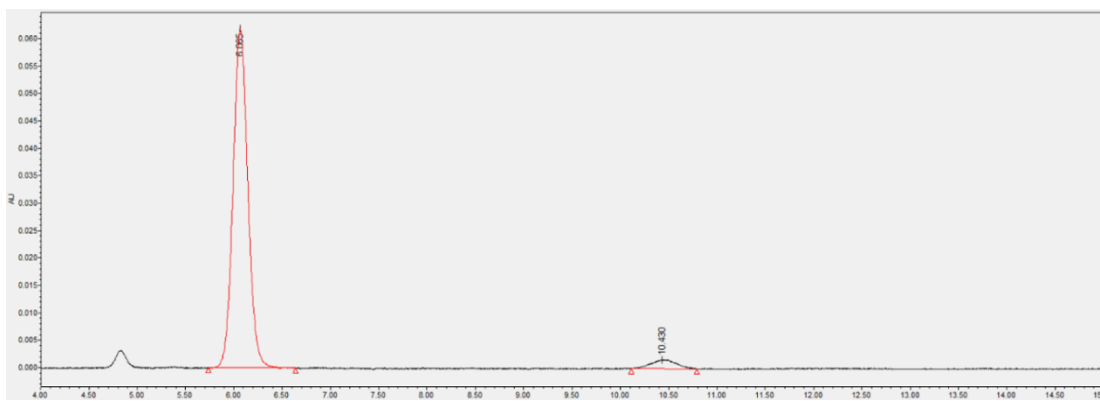

|   | Time/min | Area   | Height | Area% |
|---|----------|--------|--------|-------|
| 1 | 6.065    | 657249 | 61817  | 95.58 |
| 2 | 10.430   | 30388  | 1668   | 4.42  |

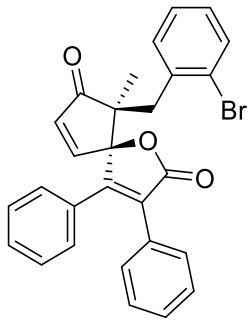

(5R,6S)-3i

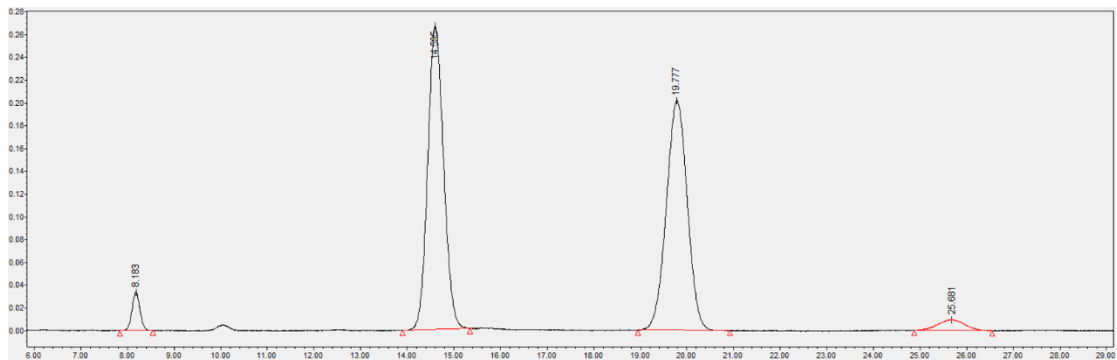

|   | Time/min | Area    | Height | Area% |
|---|----------|---------|--------|-------|
| 1 | 8.183    | 399387  | 33650  | 2.98  |
| 2 | 14.595   | 6321350 | 266256 | 47.15 |
| 3 | 19.777   | 6305360 | 201750 | 47.03 |
| 4 | 25.681   | 381159  | 9682   | 2.84  |

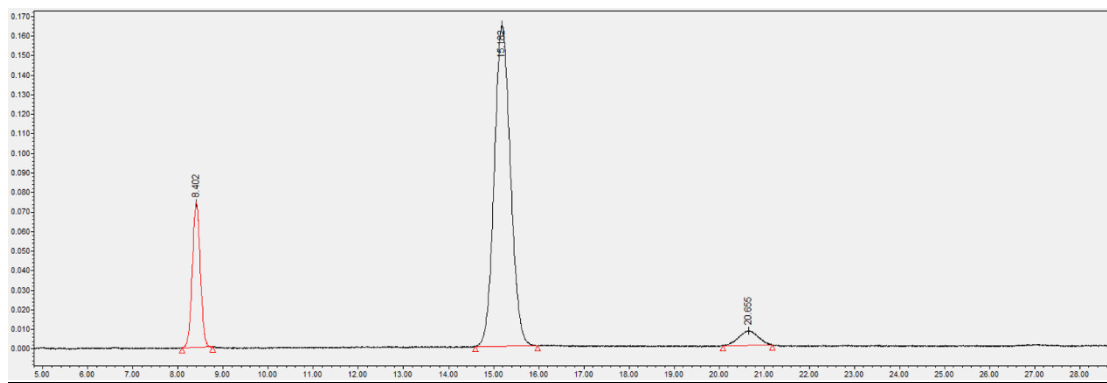

|   | Time/min | Area    | Height | Area% |
|---|----------|---------|--------|-------|
| 1 | 8.402    | 903437  | 74001  | 17.28 |
| 2 | 15.182   | 4102429 | 164157 | 78.46 |
| 3 | 20.655   | 222782  | 7661   | 4.26  |

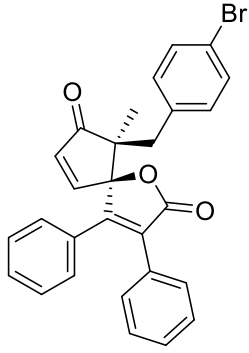

(5R,6S)-3j

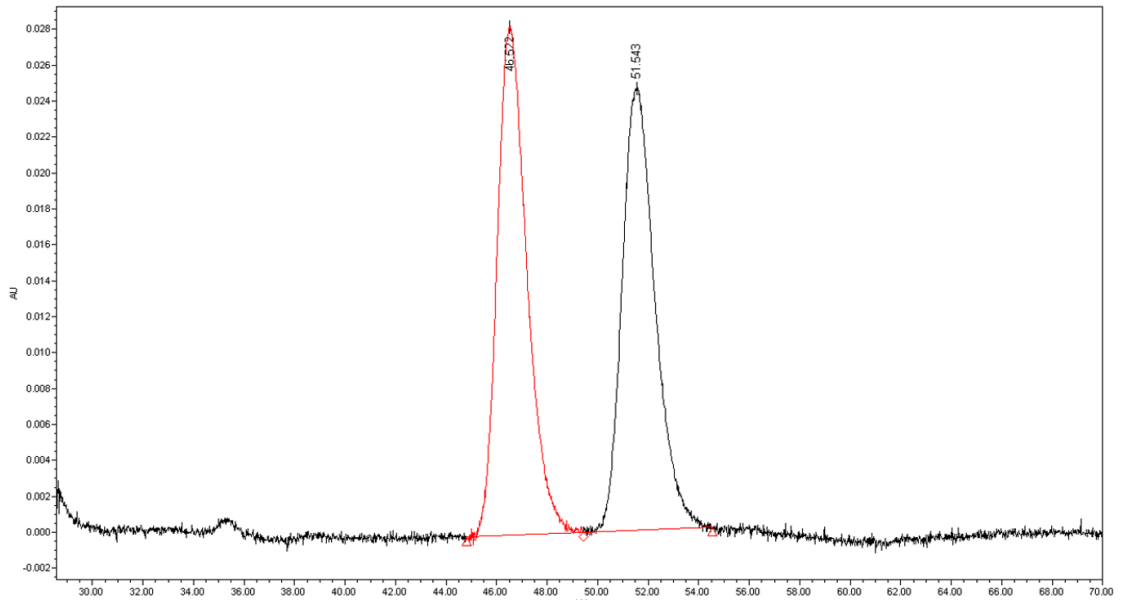

|   | Time/min | Area    | Height | Area% |
|---|----------|---------|--------|-------|
| 1 | 46.522   | 2316779 | 28290  | 50.89 |
| 2 | 51.543   | 2235929 | 24552  | 49.11 |

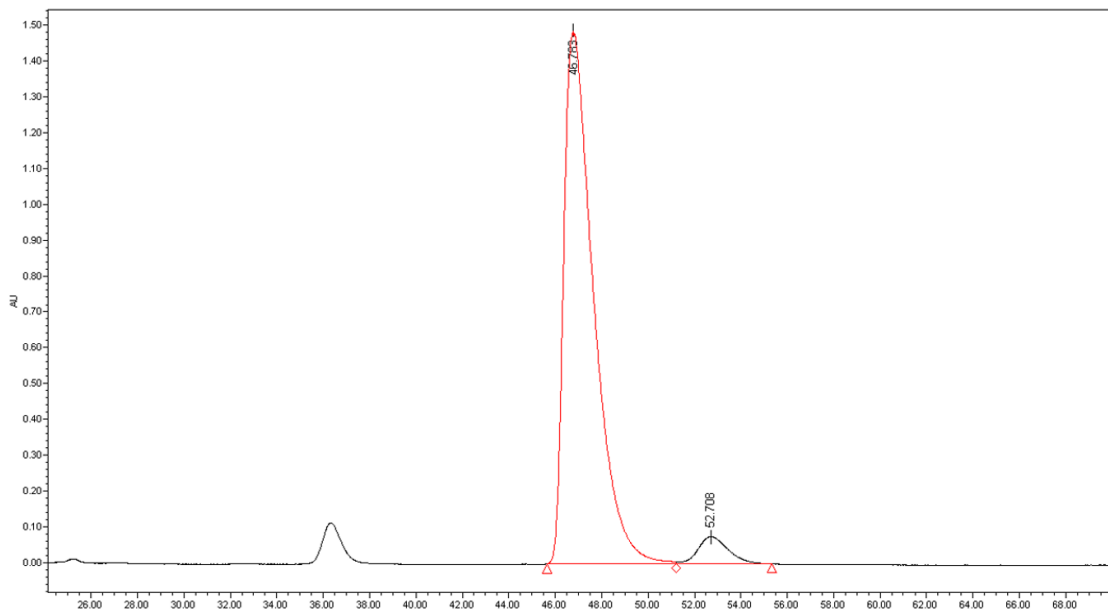

|   | Time/min | Area      | Height  | Area% |
|---|----------|-----------|---------|-------|
| 1 | 46.783   | 132055837 | 1483753 | 95.03 |
| 2 | 52.708   | 6906235   | 75825   | 4.97  |

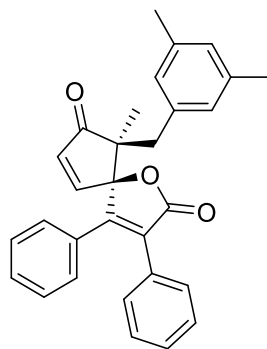

(5R,6S)-3k

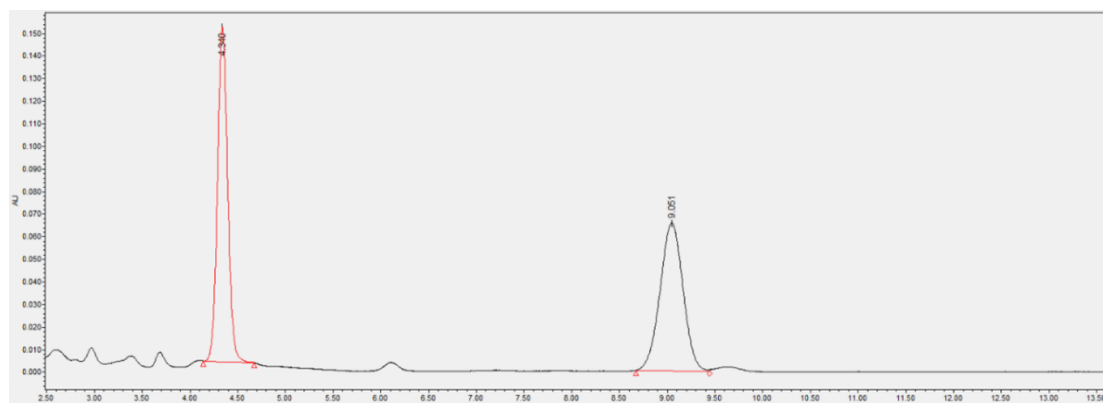

|   | Time/min | Area    | Height | Area% |
|---|----------|---------|--------|-------|
| 1 | 4.340    | 1094700 | 147891 | 50.08 |
| 2 | 9.051    | 1091386 | 65348  | 49.92 |

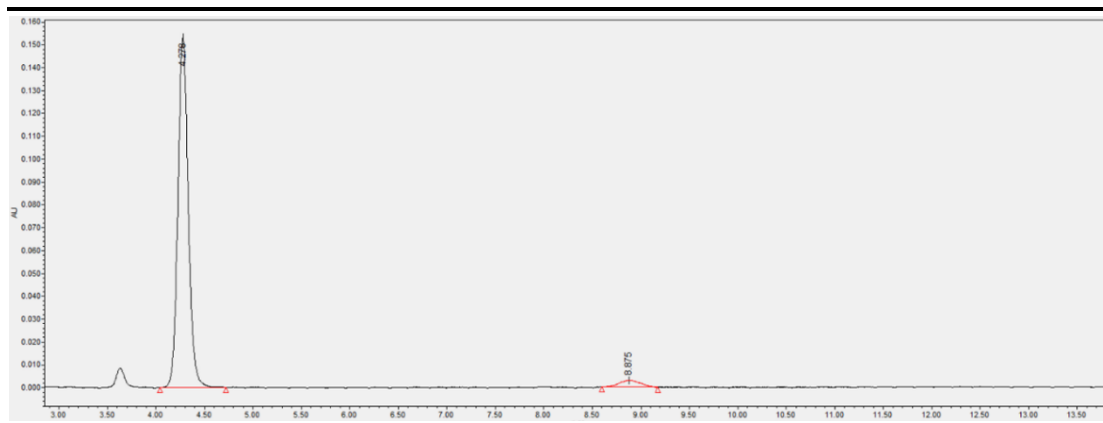

|   | Time/min | Area    | Height | Area% |
|---|----------|---------|--------|-------|
| 1 | 4.278    | 1134378 | 153021 | 96.19 |
| 2 | 8.875    | 44988   | 2973   | 3.81  |

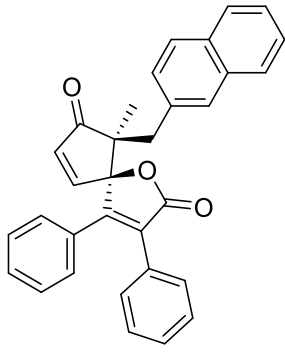

(5R,6S)-31

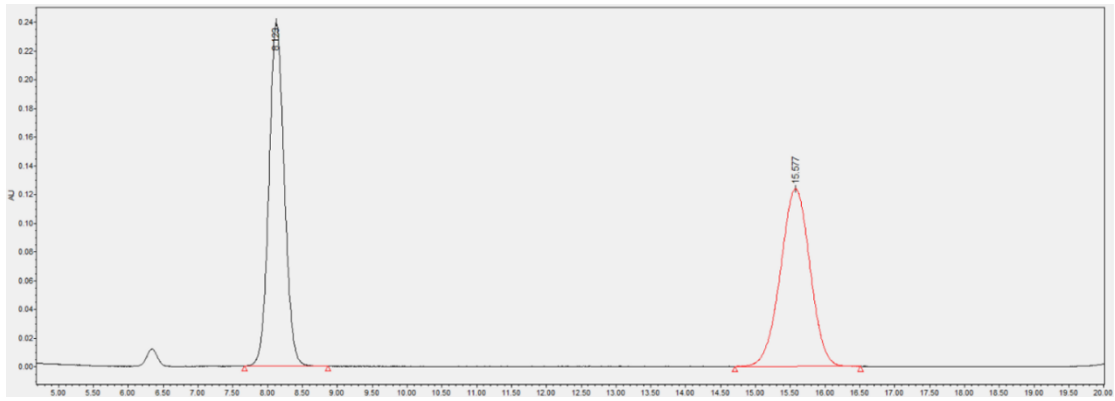

|   | Time/min | Area    | Height | Area% |
|---|----------|---------|--------|-------|
| 1 | 8.123    | 3666392 | 239161 | 50.05 |
| 2 | 15.577   | 3658953 | 123755 | 49.95 |

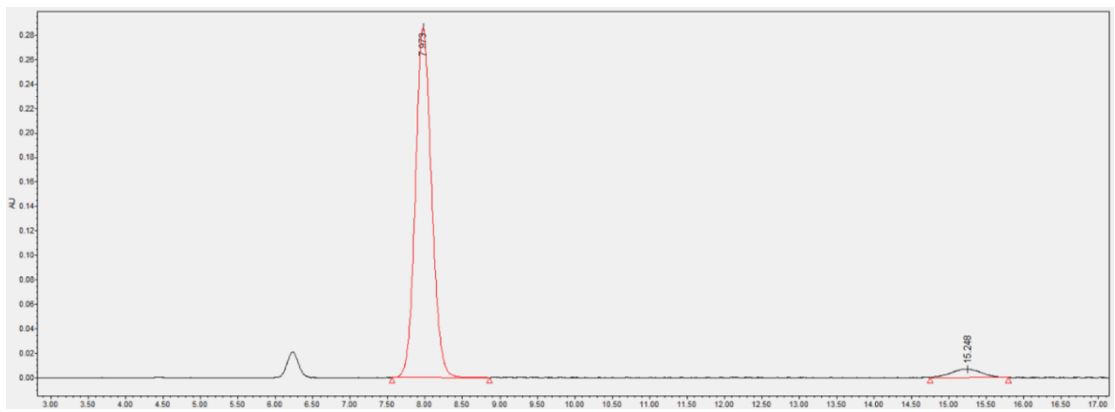

|   | Time/min | Area    | Height | Area% |
|---|----------|---------|--------|-------|
| 1 | 7.973    | 4310878 | 285820 | 95.67 |
| 2 | 15.248   | 194985  | 7026   | 4.33  |

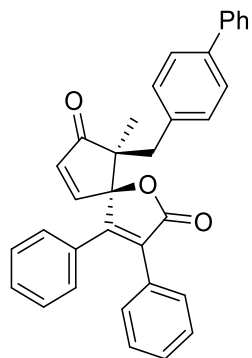

(5R,6S)-3m

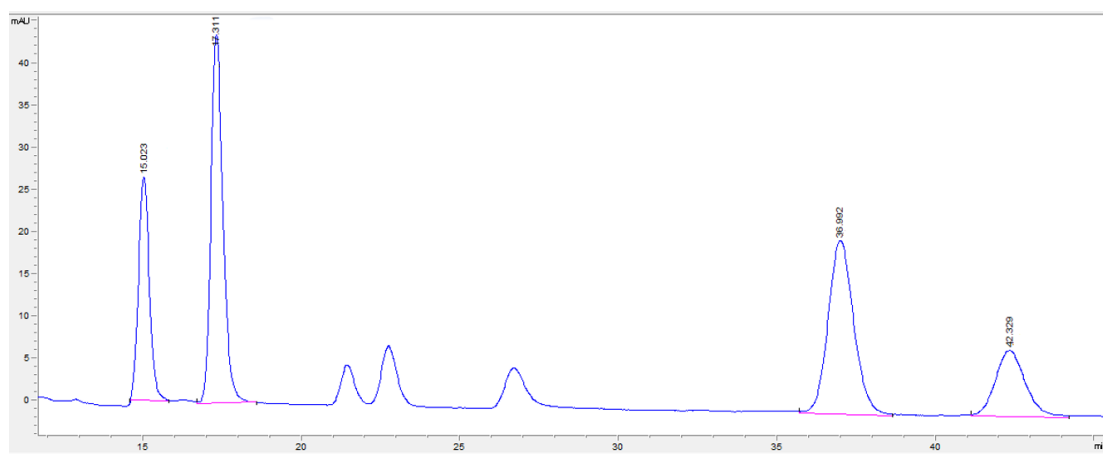

|   | Time/min | Area   | Height | Area%  |
|---|----------|--------|--------|--------|
| 1 | 15.023   | 629.8  | 26.4   | 18.108 |
| 2 | 17.311   | 1158.8 | 43.7   | 33.318 |
| 3 | 36.992   | 1167.5 | 20.6   | 33.567 |
| 4 | 42.329   | 522    | 7.9    | 15.008 |

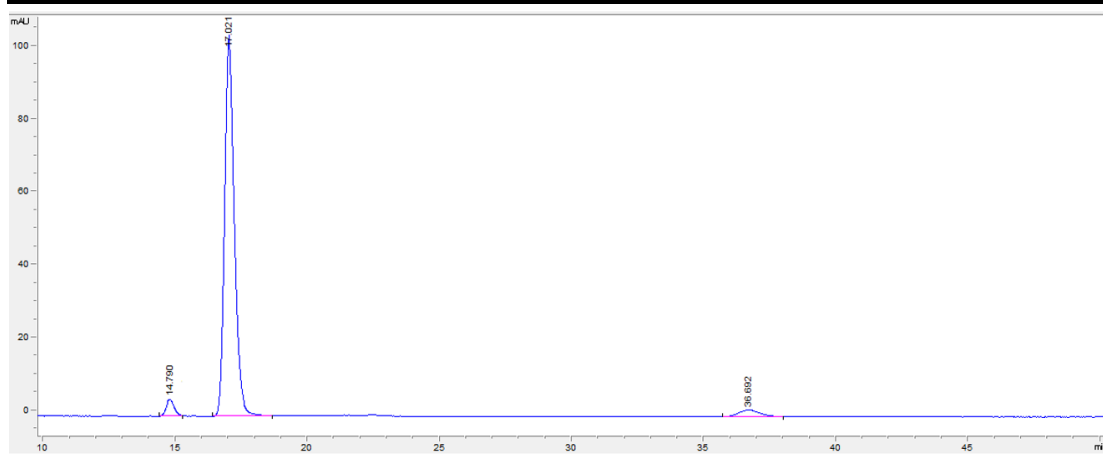

|   | Time/min | Area   | Height | Area%  |
|---|----------|--------|--------|--------|
| 1 | 14.79    | 91     | 4.5    | 3.135  |
| 2 | 17.021   | 2714.8 | 104.4  | 93.503 |
| 3 | 36.692   | 97.6   | 1.8    | 3.362  |

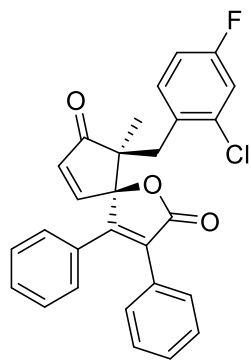

(5R,6S)-3n

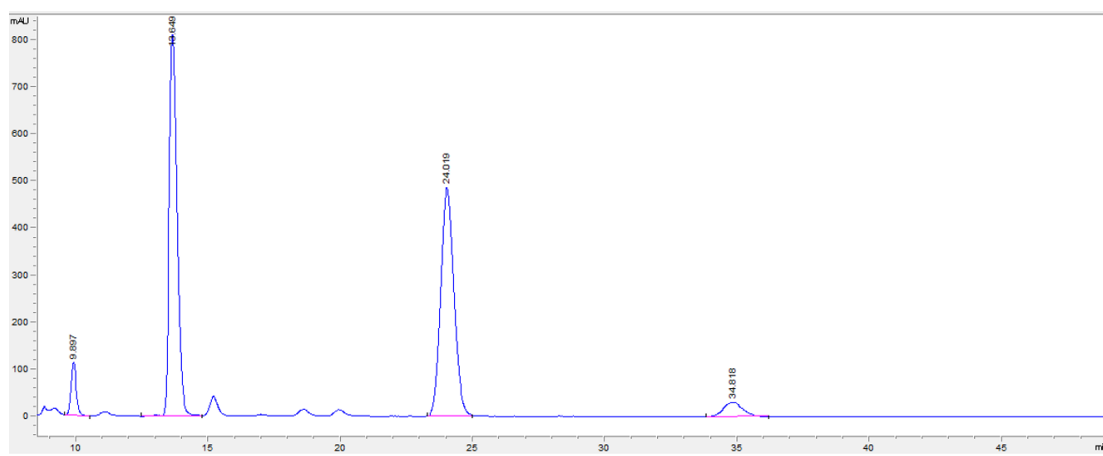

|   | Time/min | Area    | Height | Area%  |
|---|----------|---------|--------|--------|
| 1 | 9.897    | 1614.6  | 112.9  | 4.374  |
| 2 | 13.649   | 16765.4 | 810.4  | 45.416 |
| 3 | 24.019   | 16968.8 | 486.3  | 45.967 |
| 4 | 34.818   | 1566.4  | 30.5   | 4.243  |

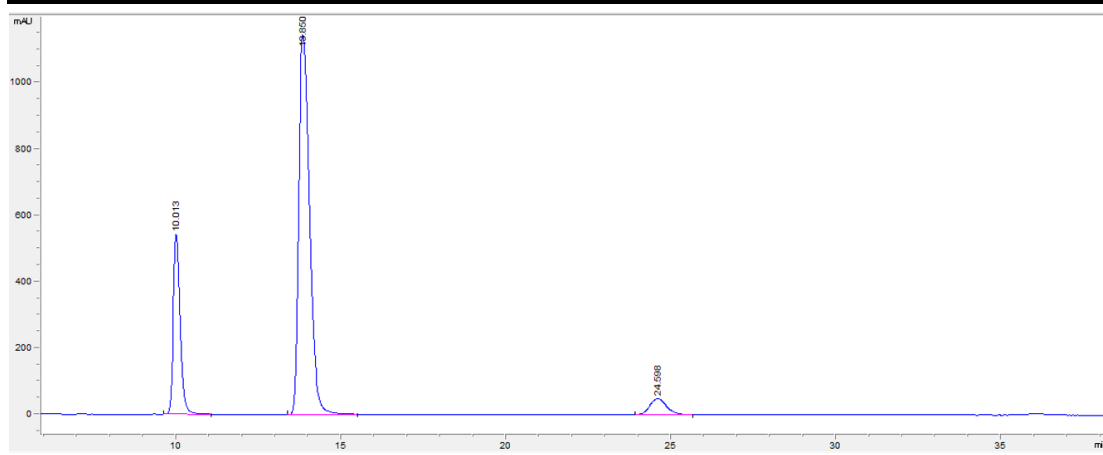

|   | Time/min | Area    | Height | Area%  |
|---|----------|---------|--------|--------|
| 1 | 10.013   | 7945.4  | 542.2  | 21.974 |
| 2 | 13.85    | 26465.4 | 1144.6 | 73.194 |
| 3 | 24.598   | 1747.2  | 48     | 4.832  |



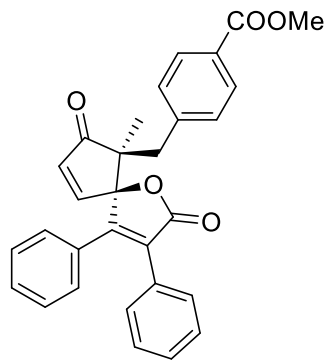

(5R,6S)-**3o**

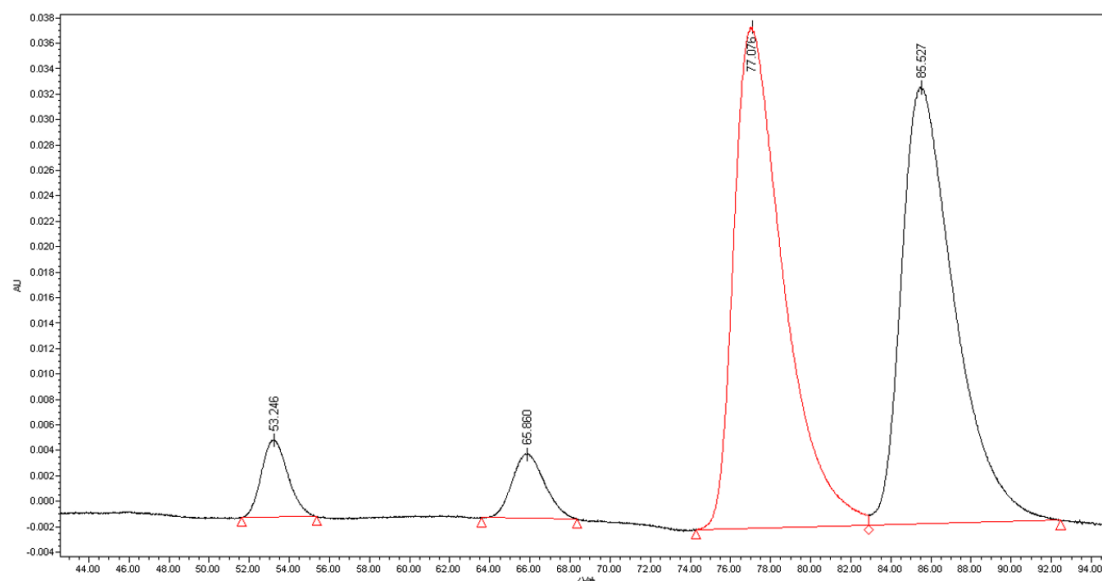

|   | Time/min | Area    | Height | Area% |
|---|----------|---------|--------|-------|
| 1 | 53.246   | 557176  | 6050   | 3.92  |
| 2 | 65.860   | 566503  | 5056   | 3.98  |
| 3 | 77.076   | 6773191 | 39390  | 47.61 |
| 4 | 85.527   | 6330437 | 34358  | 44.49 |

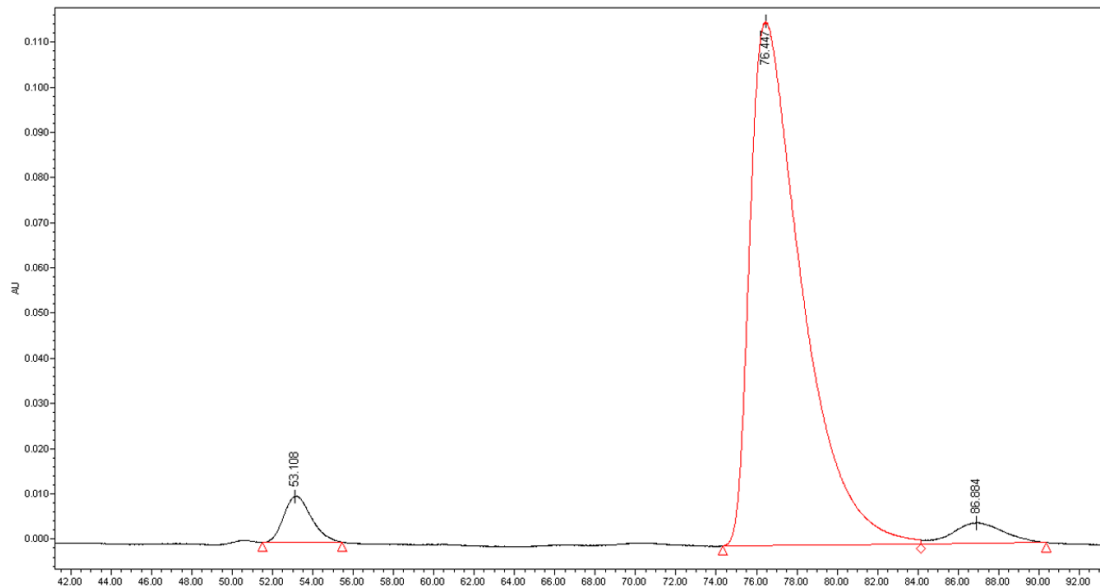

|   | Time/min | Area     | Height | Area% |
|---|----------|----------|--------|-------|
| 1 | 53.108   | 967280   | 10217  | 4.30  |
| 2 | 76.447   | 20725762 | 115986 | 92.09 |
| 3 | 89.884   | 812283   | 4571   | 3.61  |

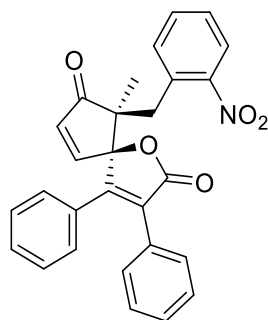

(5R,6S)-3p

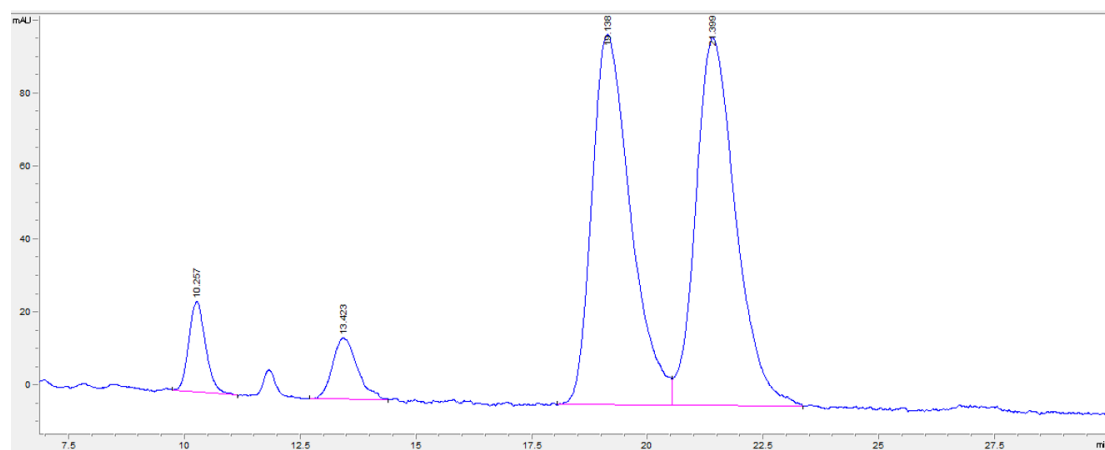

|   | Time/min | Area   | Height | Area%  |
|---|----------|--------|--------|--------|
| 1 | 10.257   | 633.5  | 24.8   | 4.770  |
| 2 | 13.423   | 631.1  | 16.8   | 4.753  |
| 3 | 19.138   | 5929.6 | 101.7  | 44.652 |

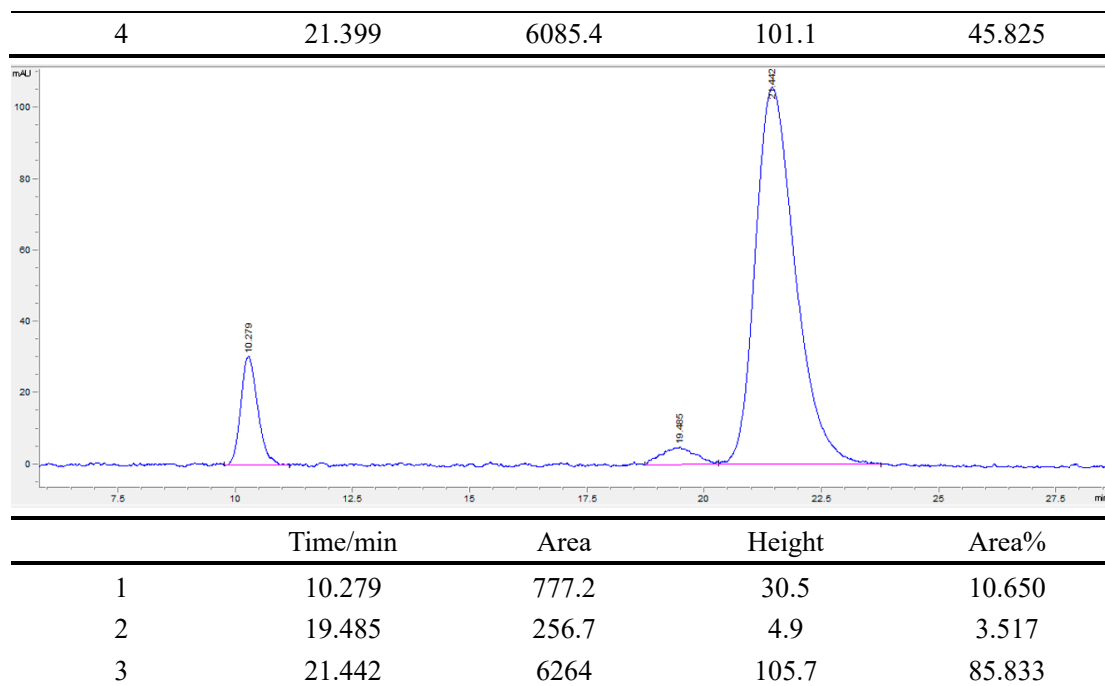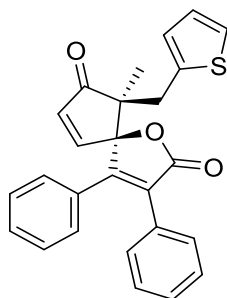

(5R,6S)-3q

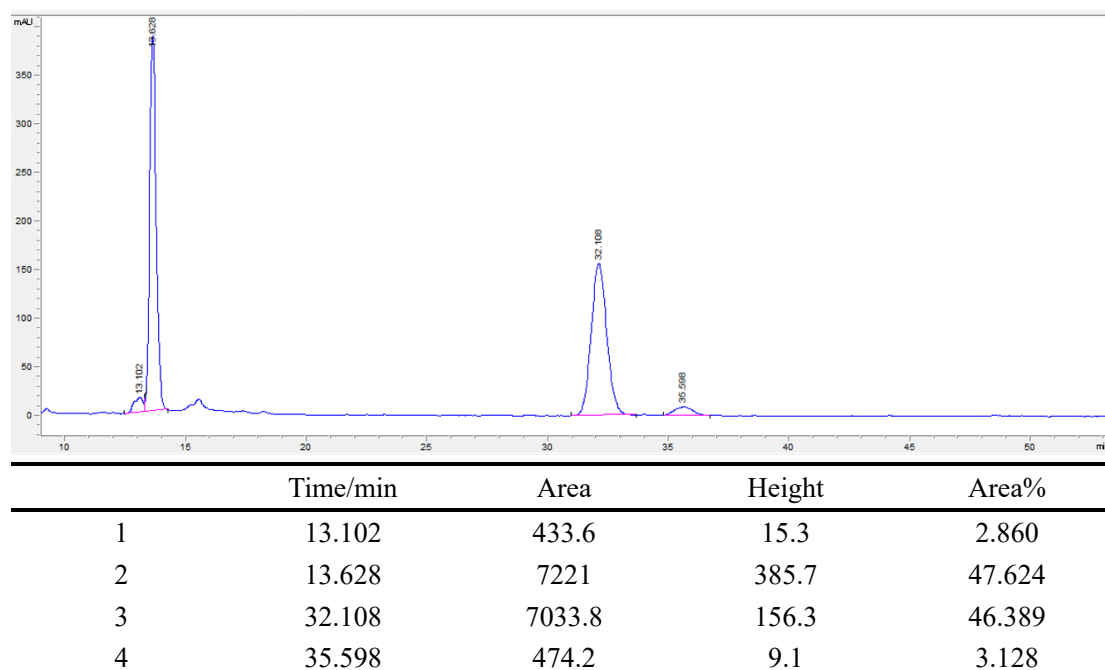

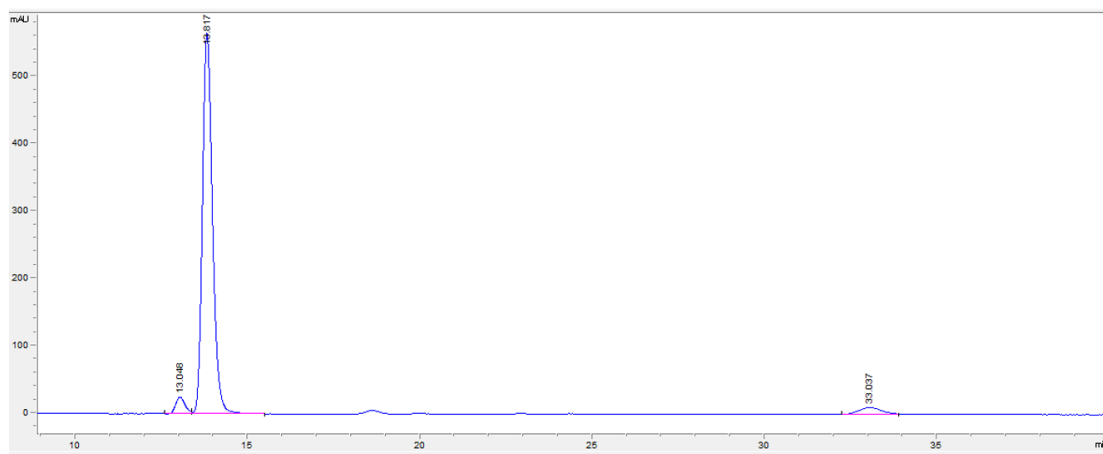

|   | Time/min | Area    | Height | Area%  |
|---|----------|---------|--------|--------|
| 1 | 13.048   | 465.9   | 24.7   | 3.813  |
| 2 | 13.817   | 11278.1 | 564.7  | 92.297 |
| 3 | 33.037   | 475.4   | 10.4   | 3.891  |

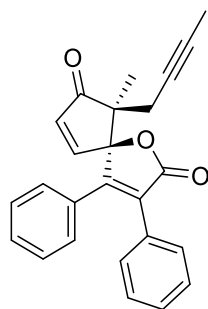

(5R,6S)-3r

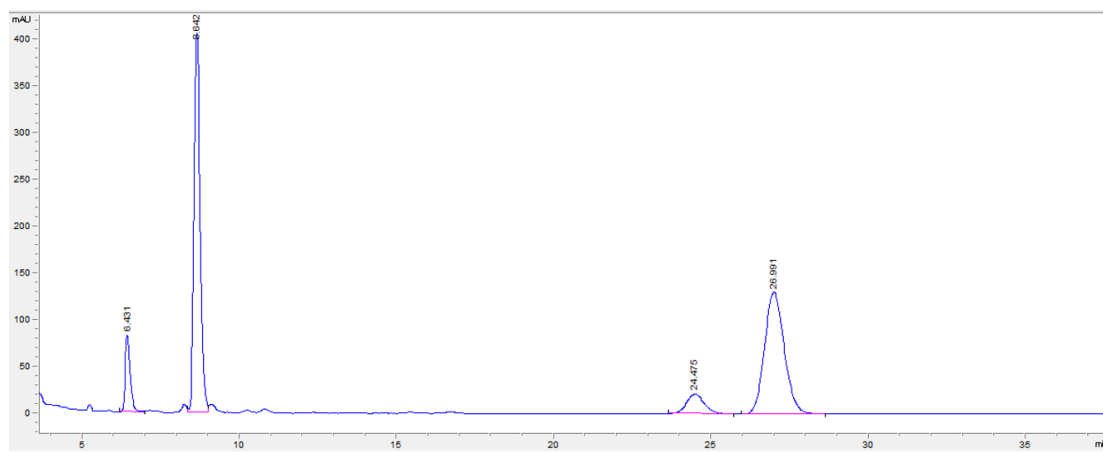

|   | Time/min | Area   | Height | Area%  |
|---|----------|--------|--------|--------|
| 1 | 6.431    | 918.2  | 82.3   | 7.109  |
| 2 | 8.642    | 5539.7 | 404.5  | 42.894 |
| 3 | 24.475   | 810.6  | 20.9   | 6.277  |
| 4 | 26.991   | 5646.3 | 129.7  | 43.719 |

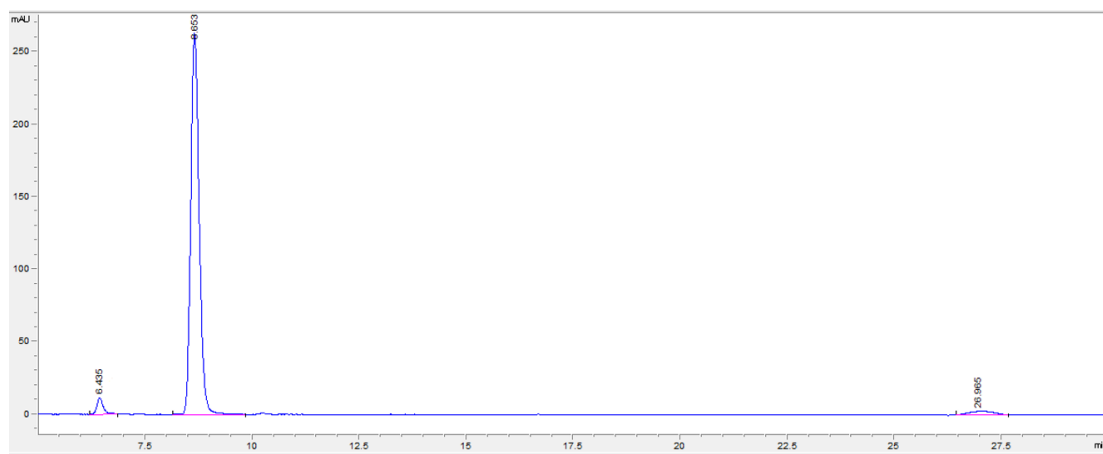

|   | Time/min | Area   | Height | Area%  |
|---|----------|--------|--------|--------|
| 1 | 6.435    | 131.1  | 11.7   | 3.388  |
| 2 | 8.653    | 3635.4 | 263.6  | 93.907 |
| 3 | 26.965   | 104.7  | 2.6    | 2.706  |

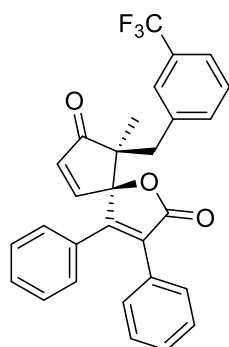

(5R,6S)-3s

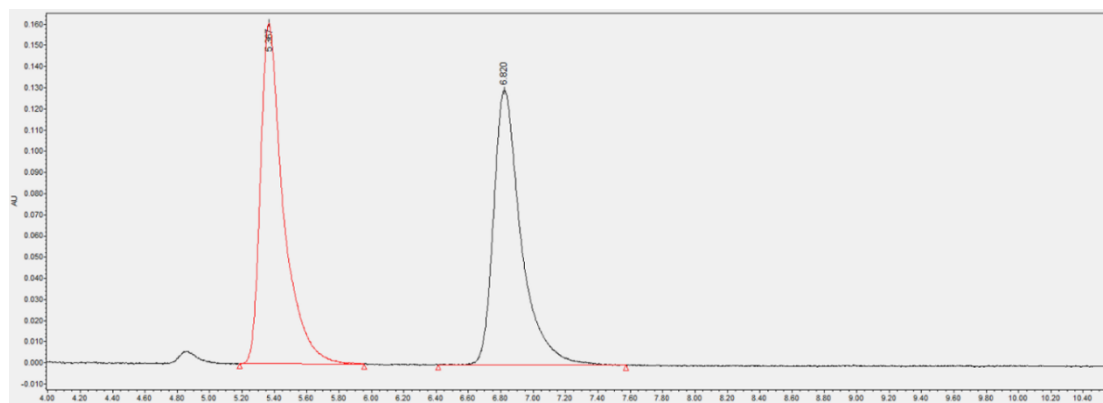

|   | Time/min | Area    | Height | Area% |
|---|----------|---------|--------|-------|
| 1 | 5.367    | 1581573 | 160745 | 50.72 |
| 2 | 6.820    | 1536391 | 129878 | 49.28 |

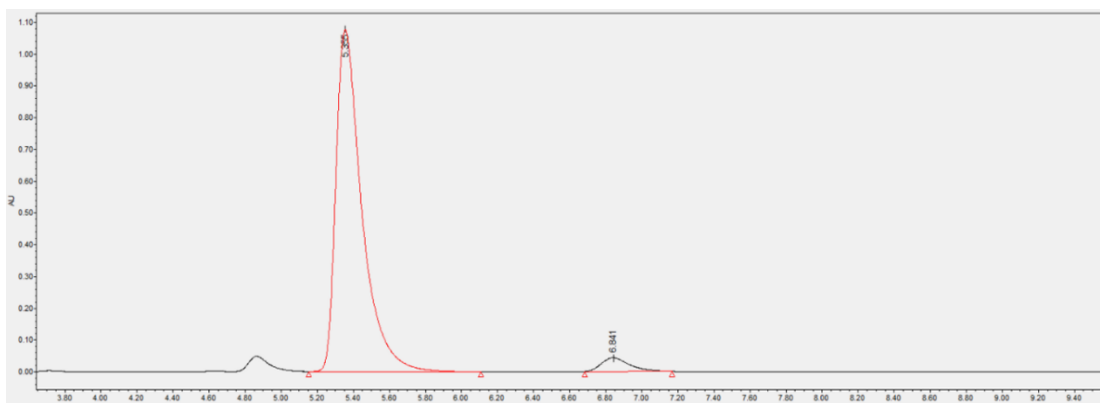

|   | Time/min | Area     | Height  | Area% |
|---|----------|----------|---------|-------|
| 1 | 5.355    | 10767244 | 1076558 | 95.86 |
| 2 | 6.841    | 464829   | 43005   | 4.14  |

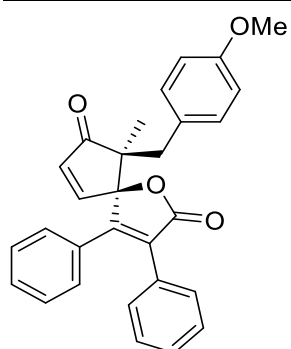

(5R,6S)-3t

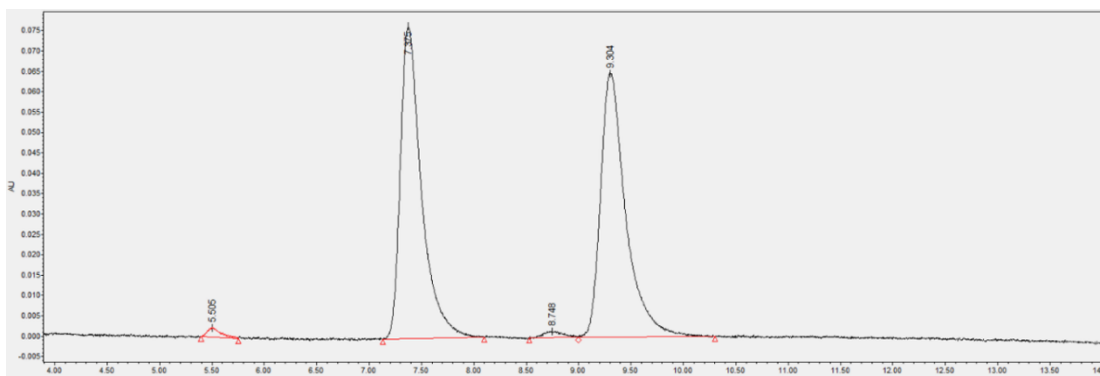

|   | Time/min | Area    | Height | Area% |
|---|----------|---------|--------|-------|
| 1 | 5.505    | 20599   | 2334   | 0.94  |
| 2 | 7.375    | 1069666 | 76653  | 48.76 |
| 3 | 8.748    | 20974   | 1594   | 0.96  |
| 4 | 9.304    | 1082451 | 64795  | 49.34 |

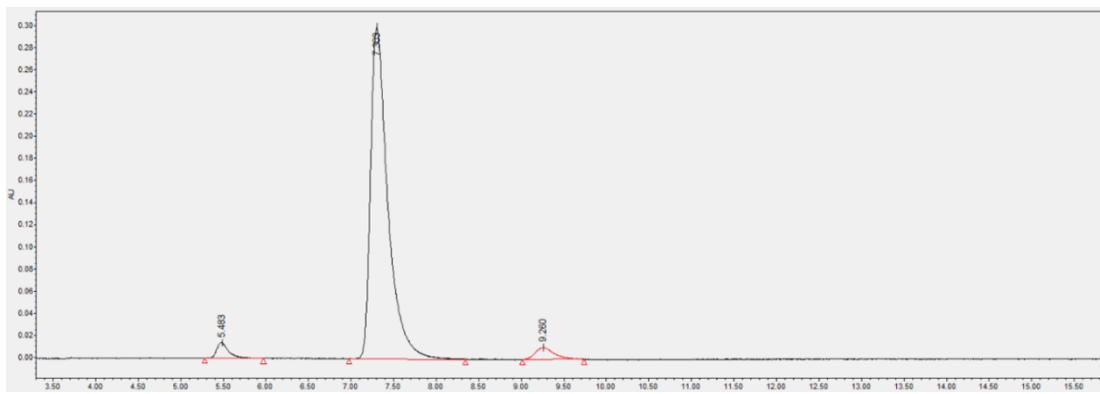

|   | Time/min | Area    | Height | Area% |
|---|----------|---------|--------|-------|
| 1 | 5.483    | 137833  | 14201  | 3.03  |
| 2 | 7.303    | 4242777 | 299926 | 93.39 |
| 3 | 9.260    | 162320  | 10820  | 3.57  |

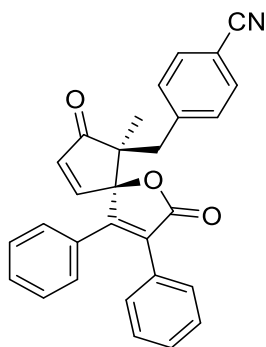

(5R,6S)-3u

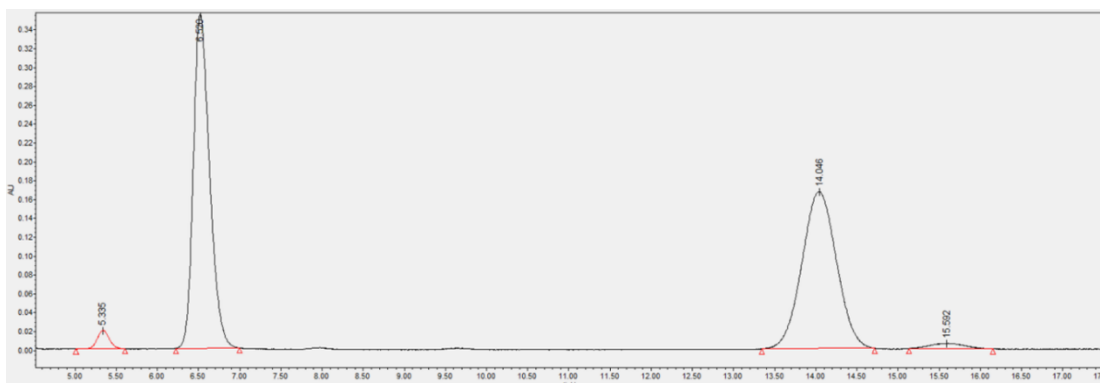

|   | Time/min | Area    | Height | Area% |
|---|----------|---------|--------|-------|
| 1 | 5.335    | 196109  | 19483  | 1.94  |
| 2 | 6.520    | 4864607 | 354429 | 48.23 |
| 3 | 14.046   | 4858476 | 166473 | 48.17 |
| 4 | 15.592   | 166343  | 5779   | 1.65  |

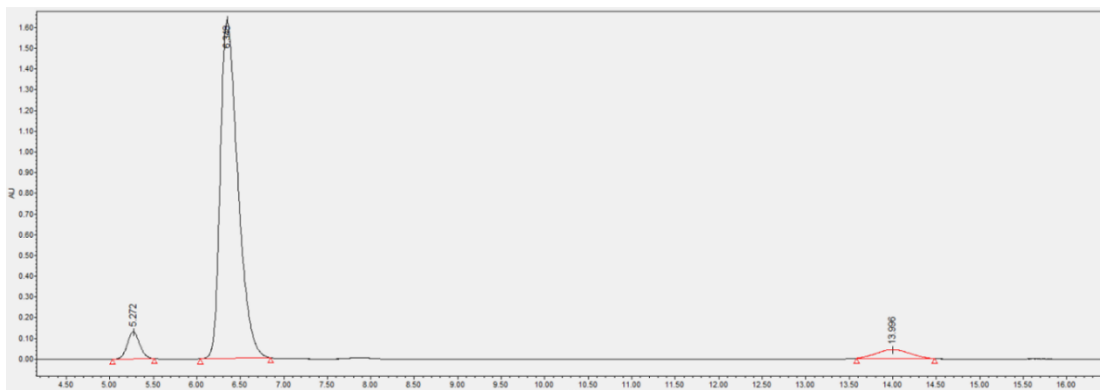

|   | Time/min | Area     | Height  | Area% |
|---|----------|----------|---------|-------|
| 1 | 5.272    | 1287679  | 130941  | 5.08  |
| 2 | 6.348    | 22957370 | 1631965 | 90.59 |
| 3 | 13.996   | 1096891  | 41574   | 4.33  |

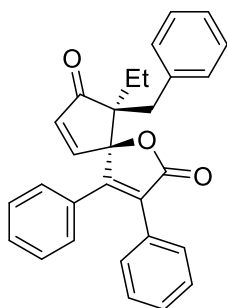

(5R,6S)-3v

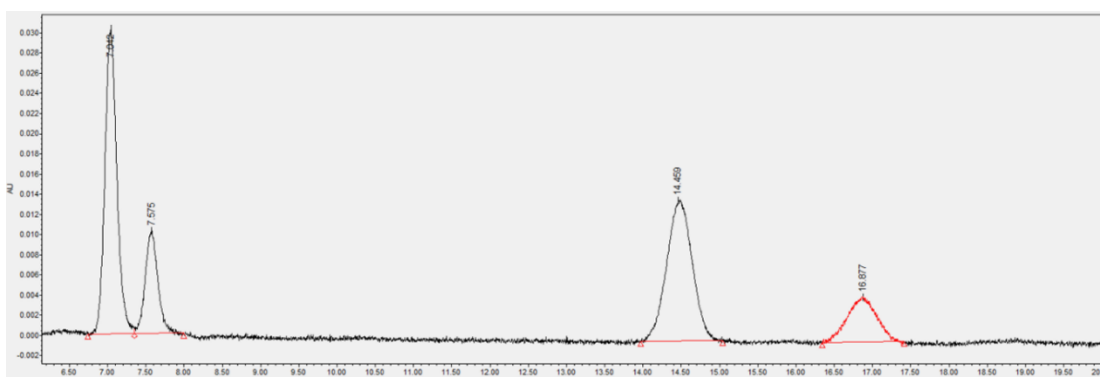

|   | Time/min | Area   | Height | Area% |
|---|----------|--------|--------|-------|
| 1 | 7.042    | 327985 | 30197  | 36.92 |
| 2 | 7.575    | 117330 | 10236  | 13.21 |
| 3 | 14.459   | 325100 | 13950  | 36.60 |
| 4 | 16.877   | 117977 | 4469   | 13.28 |



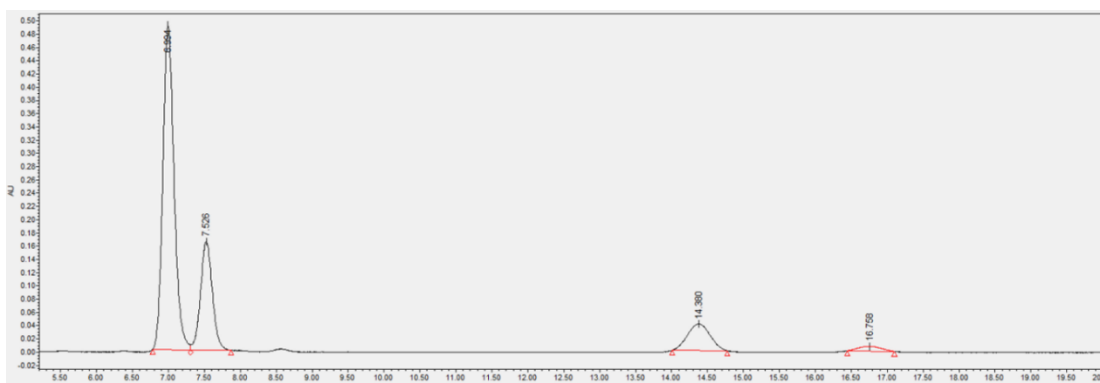

|   | Time/min | Area    | Height | Area% |
|---|----------|---------|--------|-------|
| 1 | 6.994    | 5279978 | 489797 | 64.53 |
| 2 | 7.526    | 1876926 | 164227 | 22.94 |
| 3 | 14.380   | 874448  | 40324  | 10.69 |
| 4 | 16.758   | 150936  | 7069   | 1.84  |

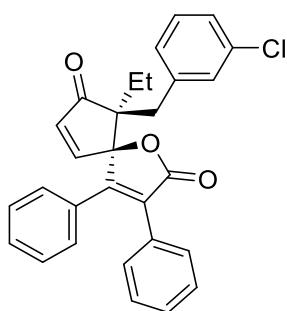

(5R,6S)-3w

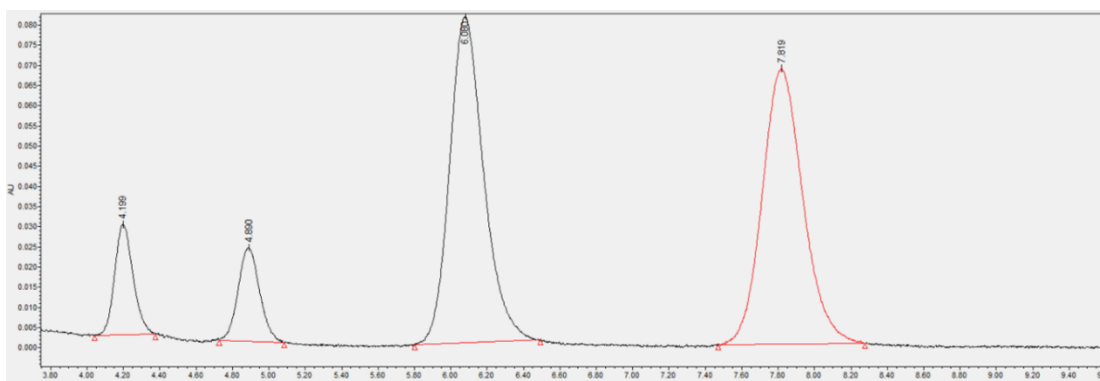

|   | Time/min | Area    | Height | Area% |
|---|----------|---------|--------|-------|
| 1 | 4.199    | 193715  | 27485  | 7.76  |
| 2 | 4.890    | 190576  | 23327  | 7.63  |
| 3 | 6.080    | 1051605 | 80950  | 42.10 |
| 4 | 7.819    | 1061751 | 68455  | 42.51 |

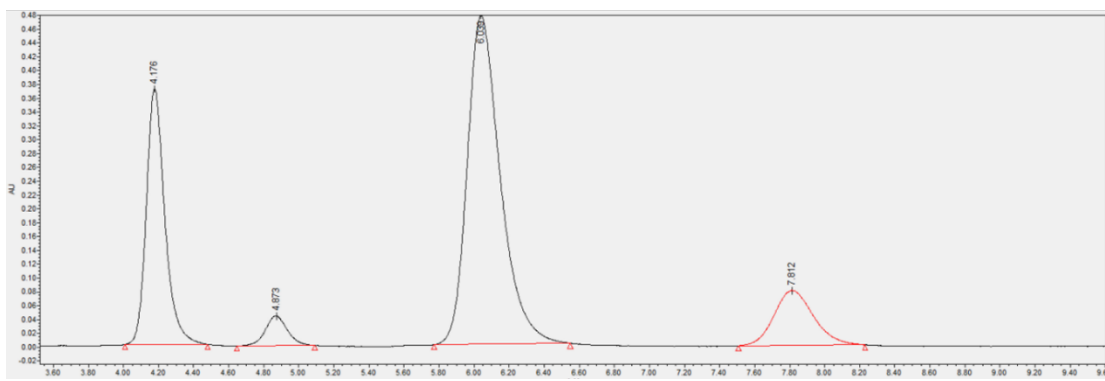

|   | Time/min | Area    | Height | Area% |
|---|----------|---------|--------|-------|
| 1 | 4.176    | 2719707 | 369963 | 25.74 |
| 2 | 4.873    | 369548  | 42696  | 3.50  |
| 3 | 6.039    | 6242964 | 475244 | 59.09 |
| 4 | 7.812    | 1233377 | 79416  | 11.67 |

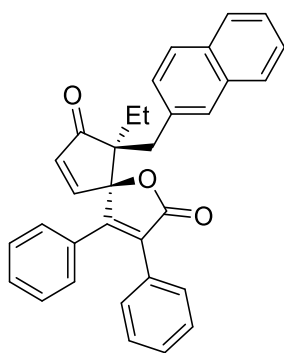

(5R,6S)-3x

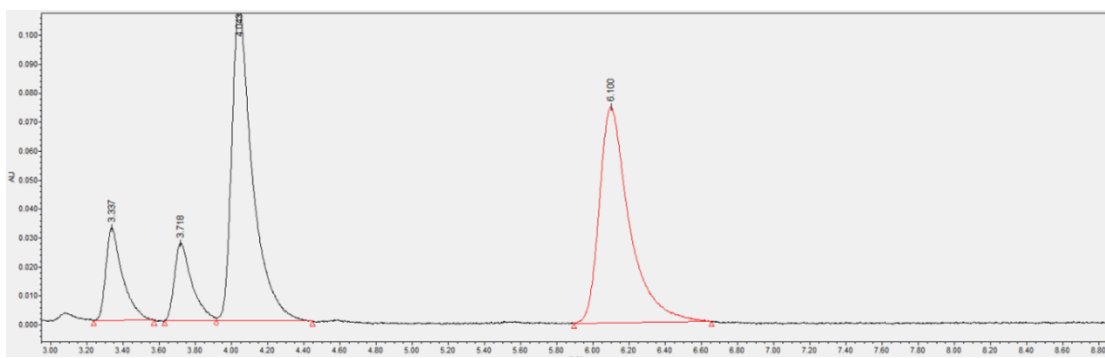

|   | Time/min | Area   | Height | Area% |
|---|----------|--------|--------|-------|
| 1 | 3.337    | 206403 | 32091  | 9.78  |
| 2 | 3.718    | 179670 | 26761  | 8.51  |
| 3 | 4.043    | 863427 | 107927 | 40.90 |
| 4 | 6.100    | 861582 | 74523  | 40.81 |

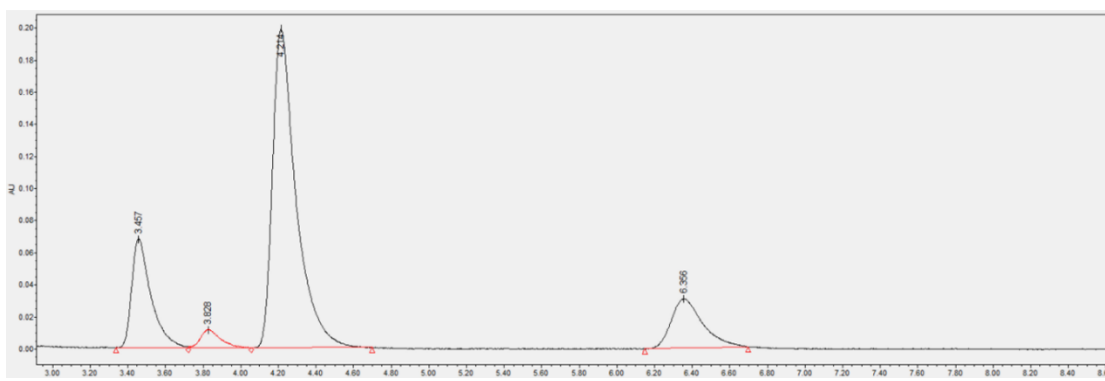

|   | Time/min | Area    | Height | Area% |
|---|----------|---------|--------|-------|
| 1 | 3.457    | 480457  | 67746  | 18.22 |
| 2 | 3.828    | 80223   | 11234  | 3.04  |
| 3 | 4.214    | 1720880 | 198362 | 65.25 |
| 4 | 6.356    | 355801  | 30743  | 13.49 |

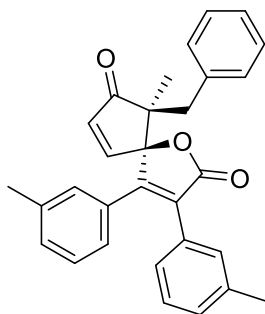

(5R,6S)-3y

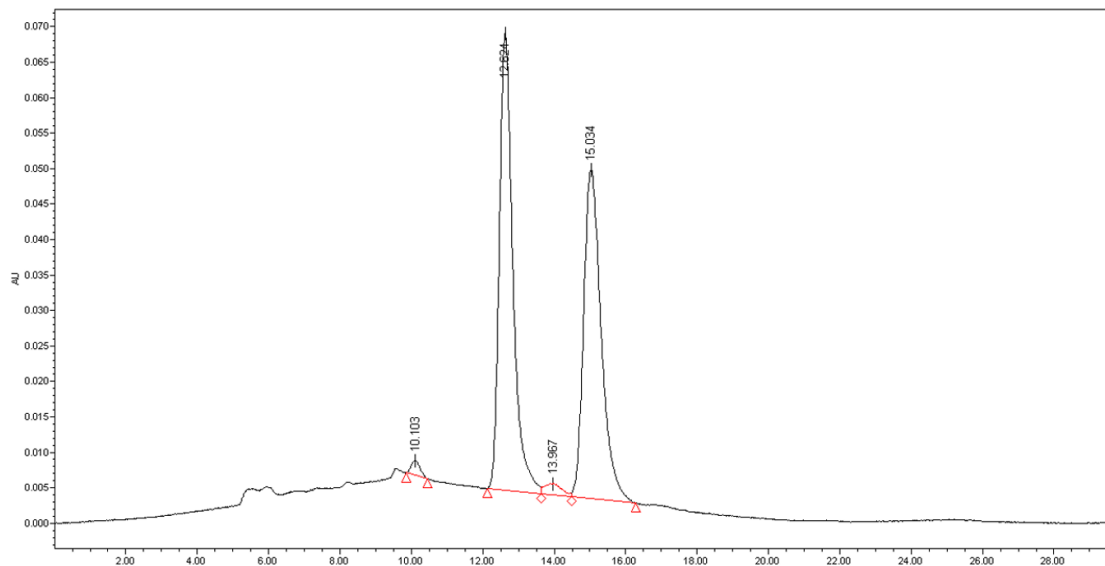

|   | Time/min | Area    | Height | Area% |
|---|----------|---------|--------|-------|
| 1 | 10.103   | 35398   | 2061   | 1.05  |
| 2 | 12.624   | 1696742 | 64370  | 50.34 |
| 3 | 13.967   | 53833   | 1580   | 1.60  |
| 4 | 15.034   | 1584482 | 46368  | 47.01 |

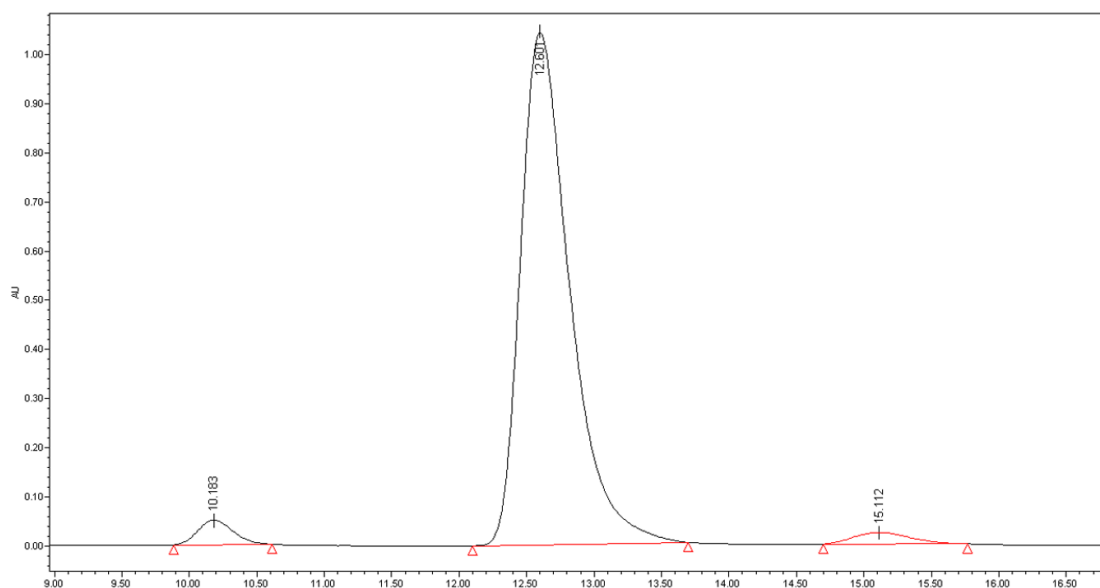

|   | Time/min | Area     | Height  | Area% |
|---|----------|----------|---------|-------|
| 1 | 10.183   | 903540   | 49746   | 3.22  |
| 2 | 12.601   | 26424459 | 1044115 | 94.30 |
| 3 | 15.112   | 692250   | 23529   | 2.47  |

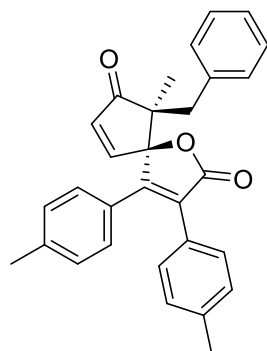

(5R,6S)-3z

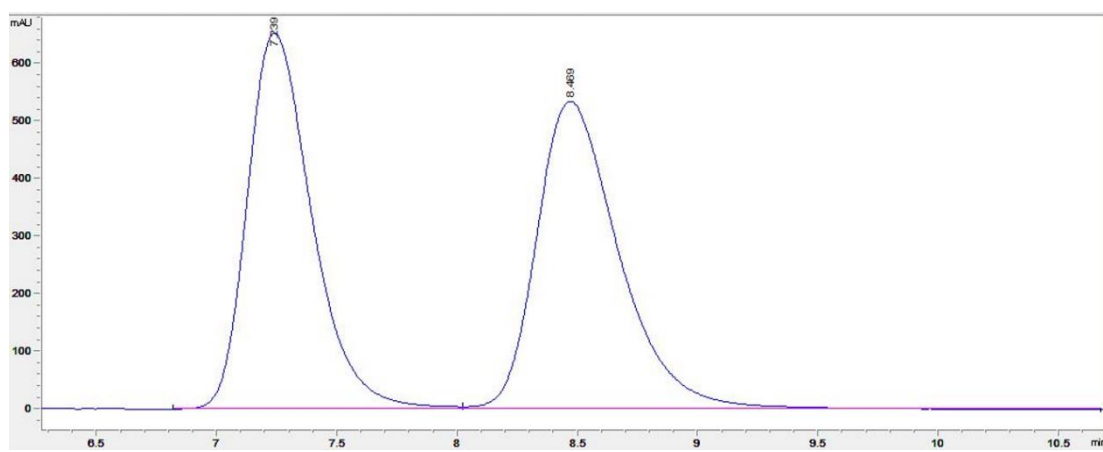

|   | Time/min | Area    | Height | Area%  |
|---|----------|---------|--------|--------|
| 1 | 7.239    | 12203   | 653.5  | 48.814 |
| 2 | 8.469    | 12795.8 | 534.9  | 51.186 |

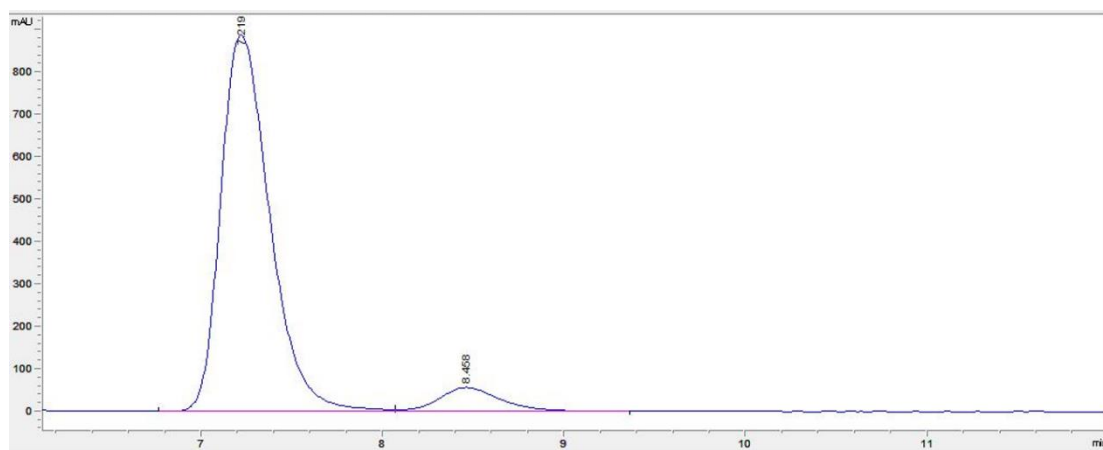

|   | Time/min | Area    | Height | Area%  |
|---|----------|---------|--------|--------|
| 1 | 7.219    | 16666.7 | 887.6  | 92.587 |
| 2 | 8.456    | 1334.4  | 56.2   | 7.413  |

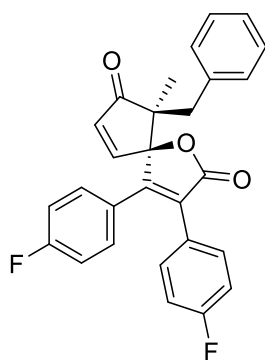

**(5R,6S)-3aa**

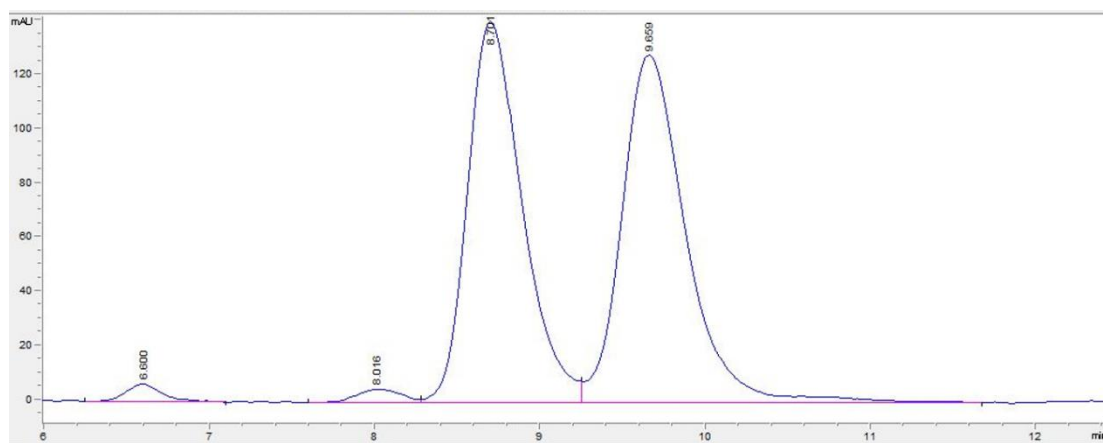

|   | Time/min | Area   | Height | Area%  |
|---|----------|--------|--------|--------|
| 1 | 6.600    | 106    | 6.7    | 1.540  |
| 2 | 8.016    | 94.9   | 5.1    | 1.378  |
| 3 | 8.701    | 3230.8 | 140.7  | 46.936 |
| 4 | 9.659    | 3451.7 | 128.1  | 50.145 |

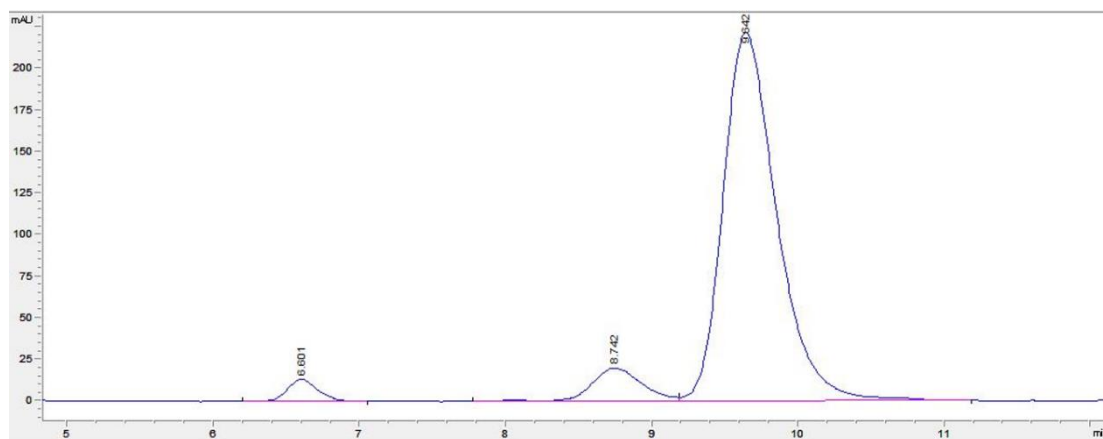

|   | Time/min | Area  | Height | Area%  |
|---|----------|-------|--------|--------|
| 1 | 6.601    | 195.9 | 13.3   | 3.098  |
| 2 | 8.742    | 480.8 | 19.8   | 7.602  |
| 3 | 9.642    | 5648  | 221.5  | 89.300 |

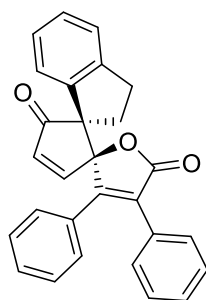

(5R,6S)-3ab

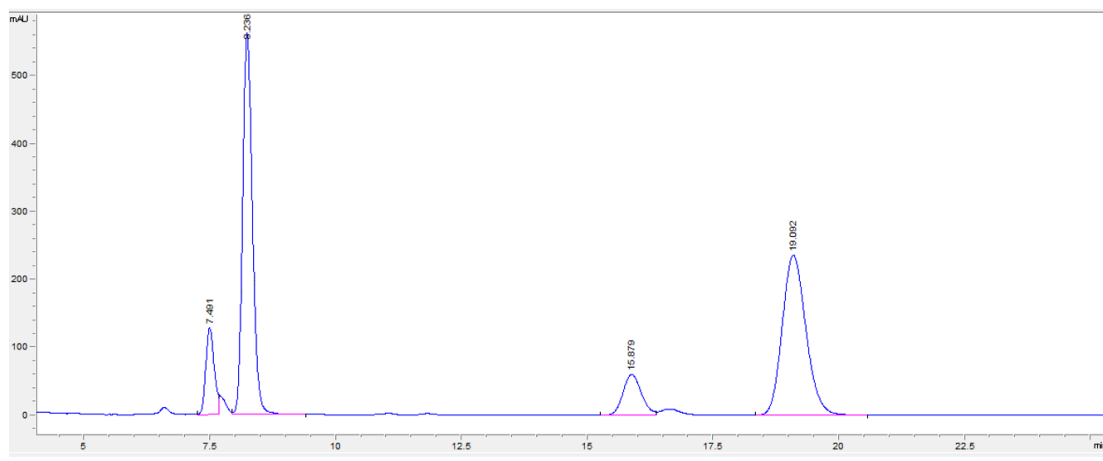

|   | Time/min | Area   | Height | Area%  |
|---|----------|--------|--------|--------|
| 1 | 7.491    | 1518   | 128.2  | 8.266  |
| 2 | 8.236    | 7606.3 | 561.3  | 41.417 |
| 3 | 15.879   | 1523.1 | 60.1   | 8.294  |
| 4 | 19.092   | 7717.6 | 235.7  | 42.023 |

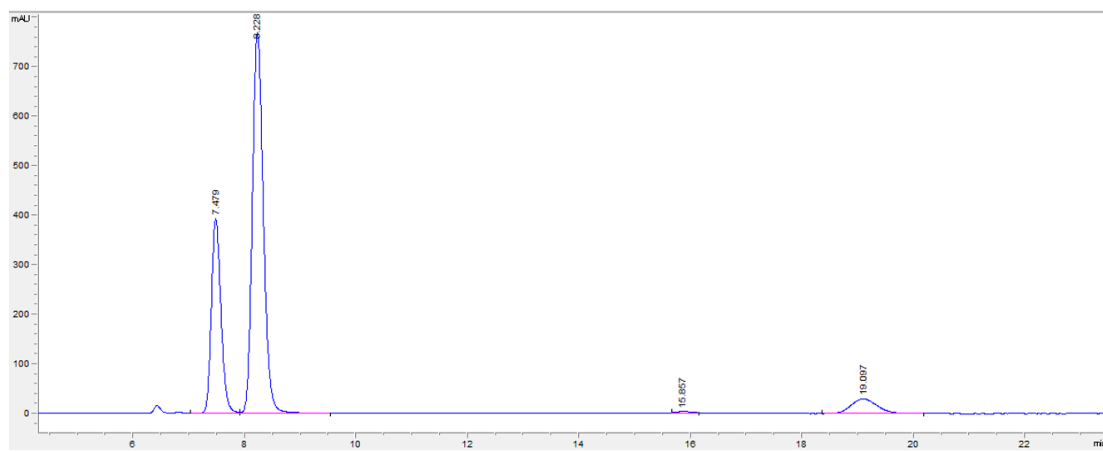

|   | Time/min | Area    | Height | Area%  |
|---|----------|---------|--------|--------|
| 1 | 7.479    | 4666.7  | 393.6  | 28.764 |
| 2 | 8.228    | 10517.6 | 768.1  | 64.828 |
| 3 | 15.857   | 65.2    | 3.5    | 0.402  |
| 4 | 19.097   | 974.3   | 29.6   | 6.006  |

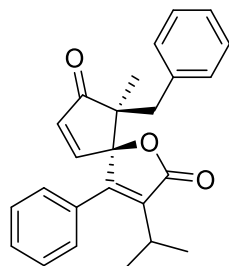

(5R,6S)-3ac

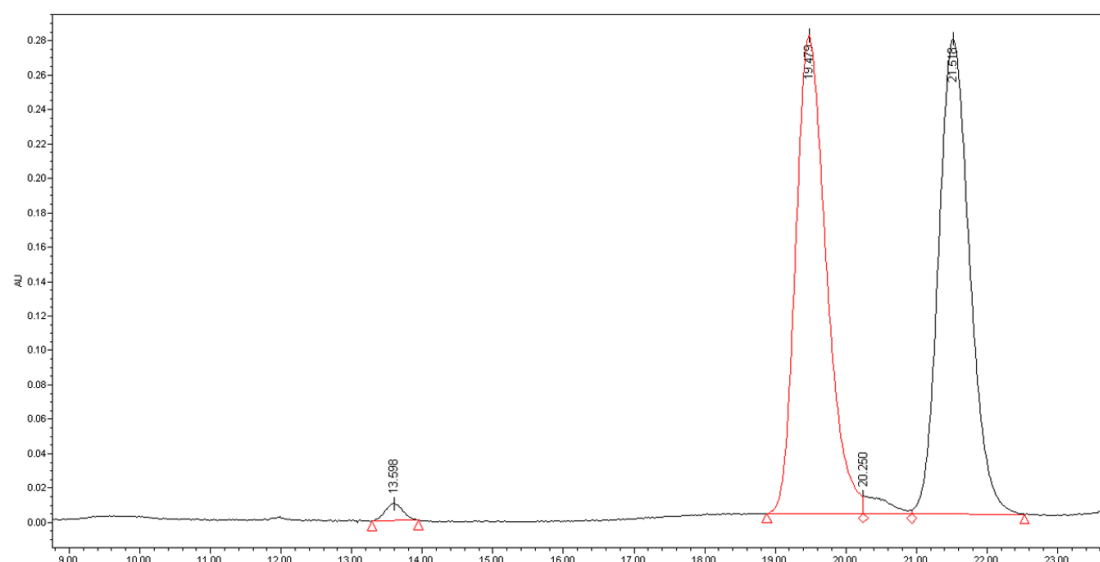

|   | Time/min | Area    | Height | Area% |
|---|----------|---------|--------|-------|
| 1 | 13.598   | 177486  | 10098  | 1.03  |
| 2 | 19.479   | 8353169 | 277679 | 48.60 |
| 3 | 20.250   | 255167  | 10399  | 1.48  |

4                      21.518                      8402640                      276270                      48.89

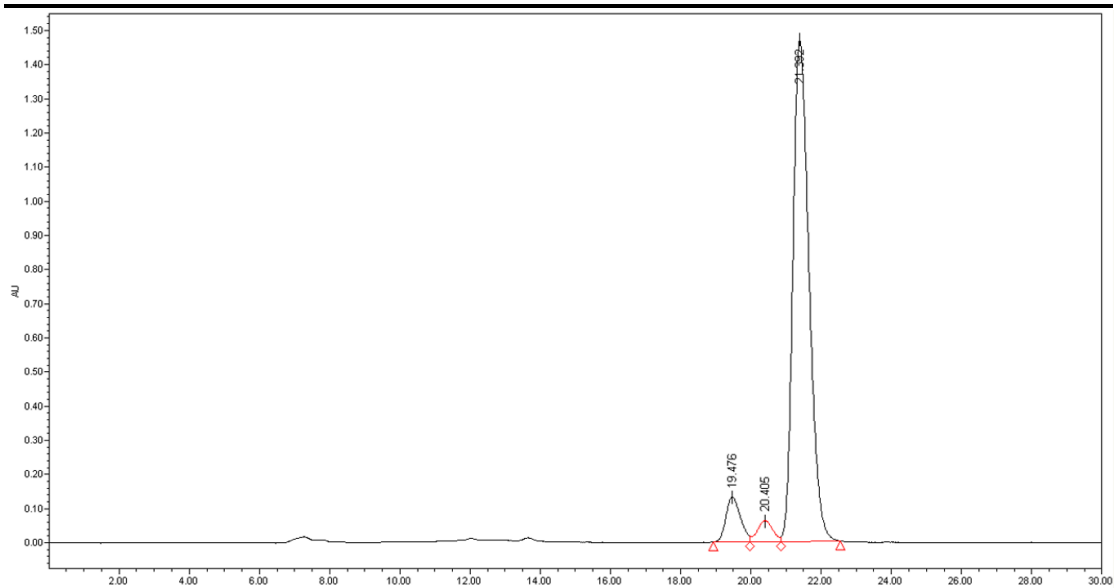

|   | Time/min | Area     | Height  | Area% |
|---|----------|----------|---------|-------|
| 1 | 19.476   | 3730669  | 131307  | 7.09  |
| 2 | 20.405   | 1873751  | 61257   | 3.56  |
| 3 | 21.392   | 47042194 | 1469297 | 89.35 |

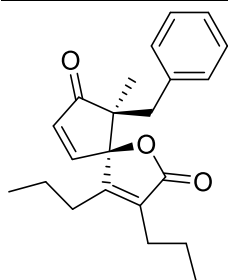

**(5R,6S)-3ad**

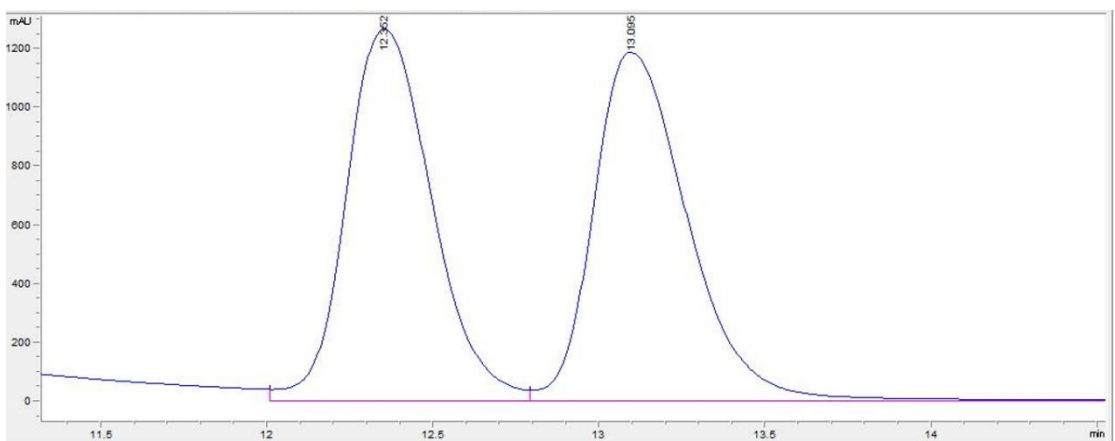

|   | Time/min | Area    | Height | Area%  |
|---|----------|---------|--------|--------|
| 1 | 12.352   | 22774.7 | 1268.7 | 48.815 |
| 2 | 13.095   | 23880.4 | 1186.5 | 51.185 |



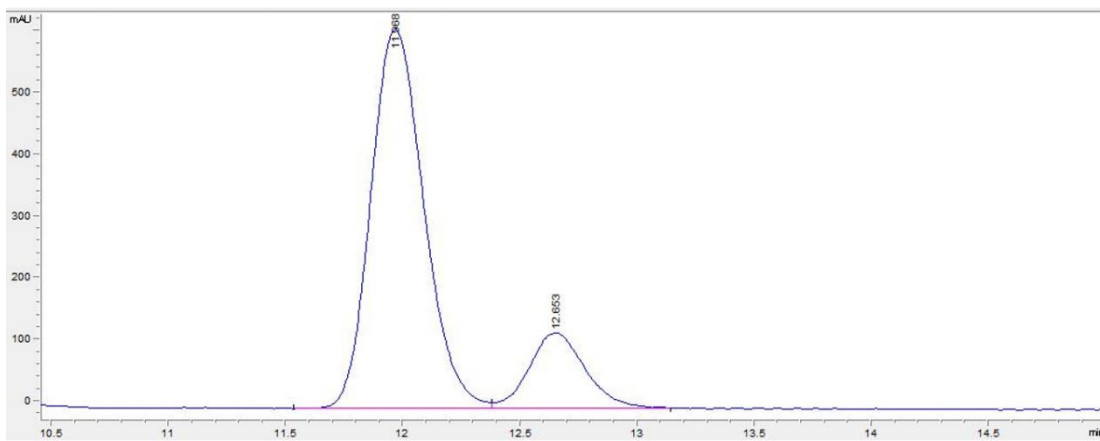

|   | Time/min | Area   | Height | Area%  |
|---|----------|--------|--------|--------|
| 1 | 11.968   | 9682.8 | 614.4  | 82.413 |
| 2 | 12.653   | 2066.3 | 122.4  | 17.587 |

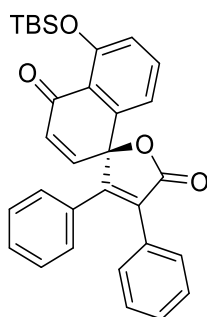

5

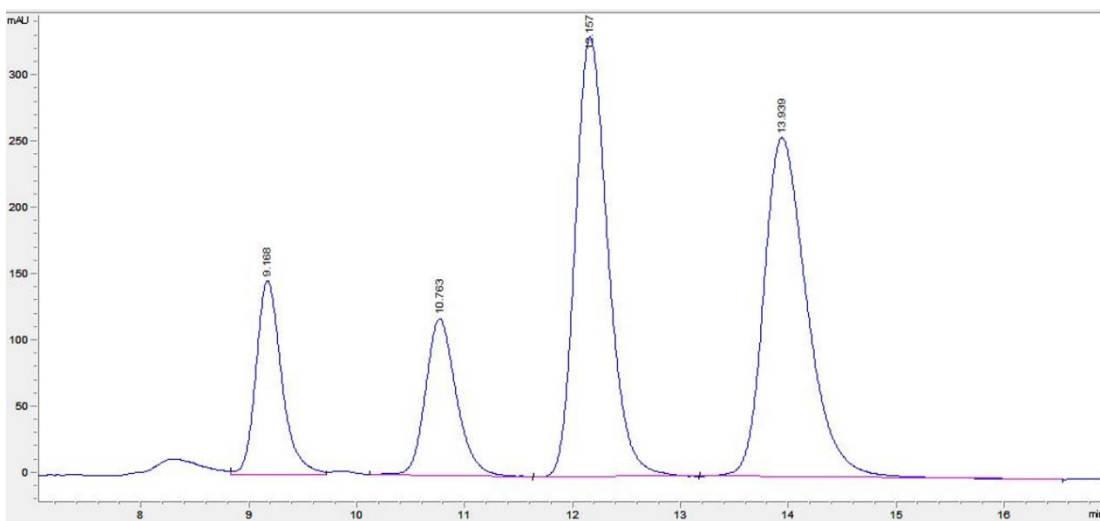

|   | Time/min | Area   | Height | Area%  |
|---|----------|--------|--------|--------|
| 1 | 9.168    | 2429.3 | 146.7  | 12.832 |
| 2 | 10.763   | 2366.6 | 118.4  | 12.501 |
| 3 | 12.157   | 6979.7 | 332    | 36.868 |
| 4 | 13.999   | 7155.8 | 256.2  | 37.799 |

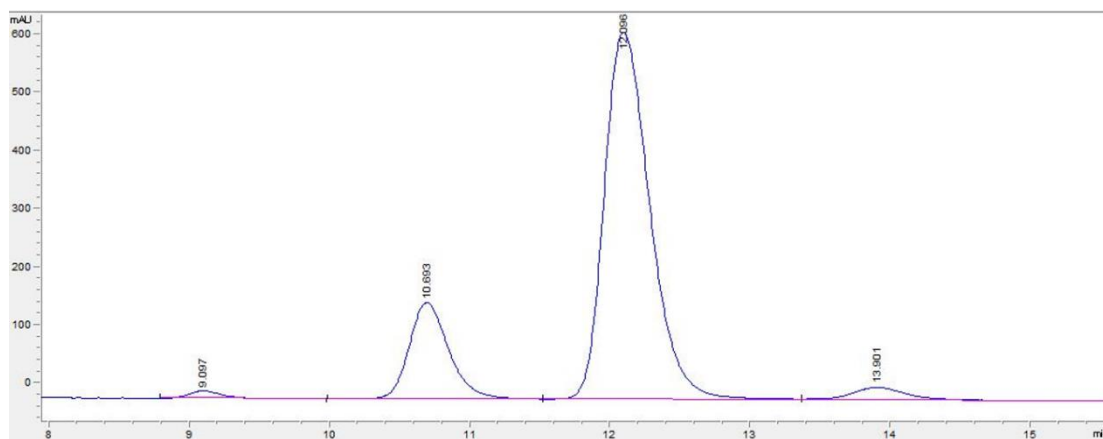

|   | Time/min | Area    | Height | Area%  |
|---|----------|---------|--------|--------|
| 1 | 9.097    | 223.8   | 12.7   | 1.216  |
| 2 | 10.693   | 3261.8  | 165.6  | 17.729 |
| 3 | 12.096   | 14263.5 | 630.9  | 77.527 |
| 4 | 13.901   | 649.1   | 22     | 3.528  |

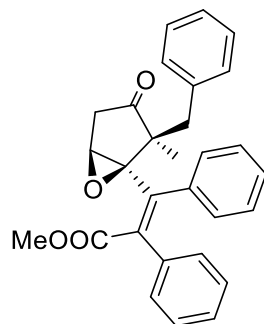

6

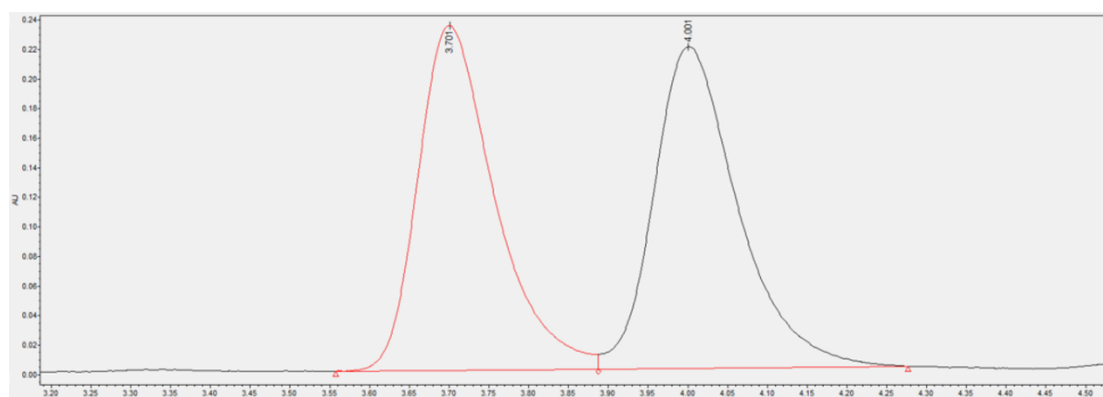

|   | Time/min | Area    | Height | Area% |
|---|----------|---------|--------|-------|
| 1 | 3.701    | 1567932 | 233152 | 49.48 |
| 2 | 4.001    | 1601204 | 217684 | 50.52 |

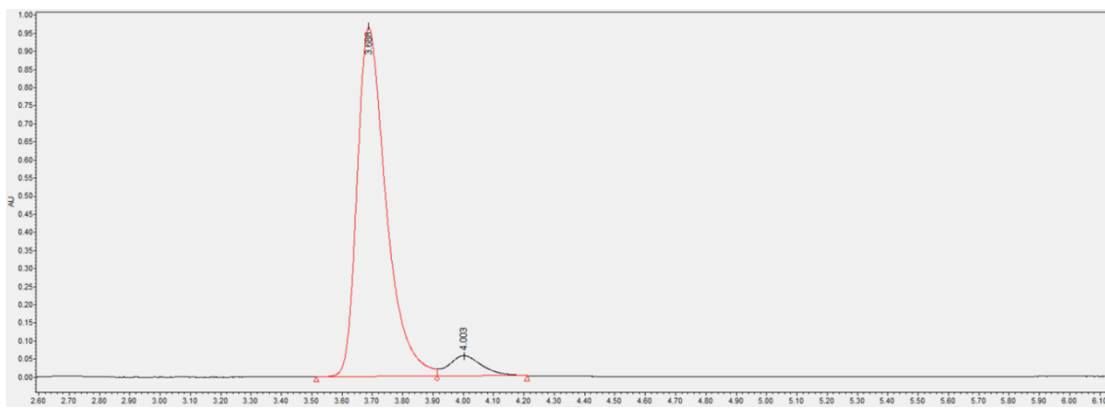

|   | Time/min | Area    | Height | Area% |
|---|----------|---------|--------|-------|
| 1 | 3.688    | 6413214 | 965843 | 93.74 |
| 2 | 4.003    | 428267  | 56032  | 6.26  |

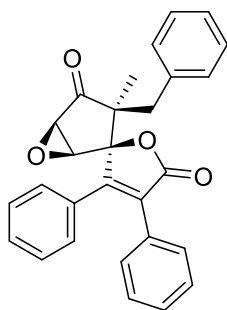

7

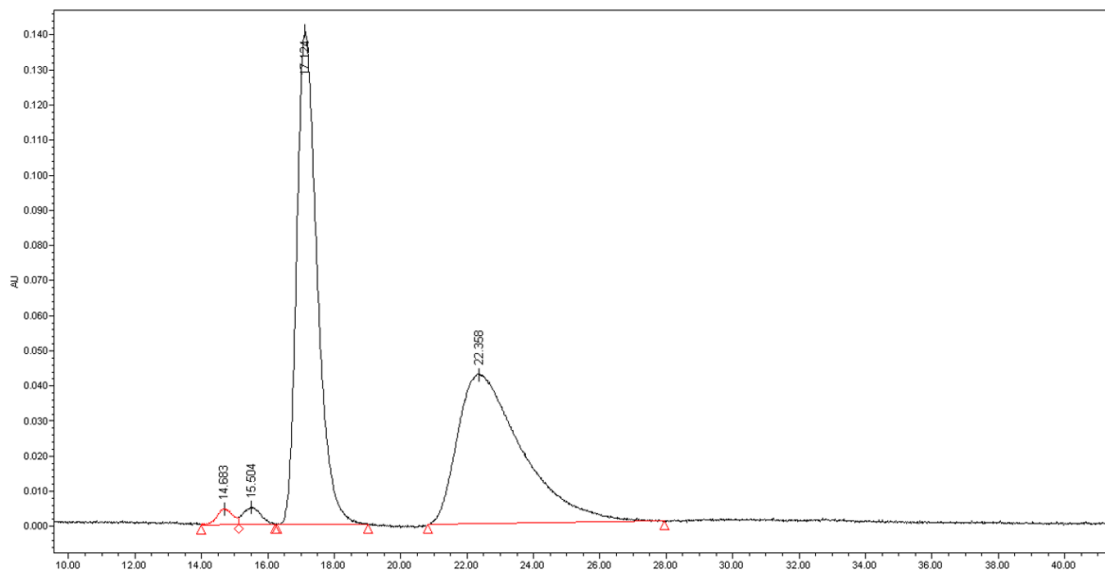

|   | Time/min | Area    | Height | Area% |
|---|----------|---------|--------|-------|
| 1 | 14.683   | 146722  | 4478   | 1.22  |
| 2 | 15.504   | 174848  | 4786   | 1.45  |
| 3 | 17.124   | 5992317 | 140433 | 49.80 |
| 4 | 22.358   | 5717953 | 42617  | 47.52 |

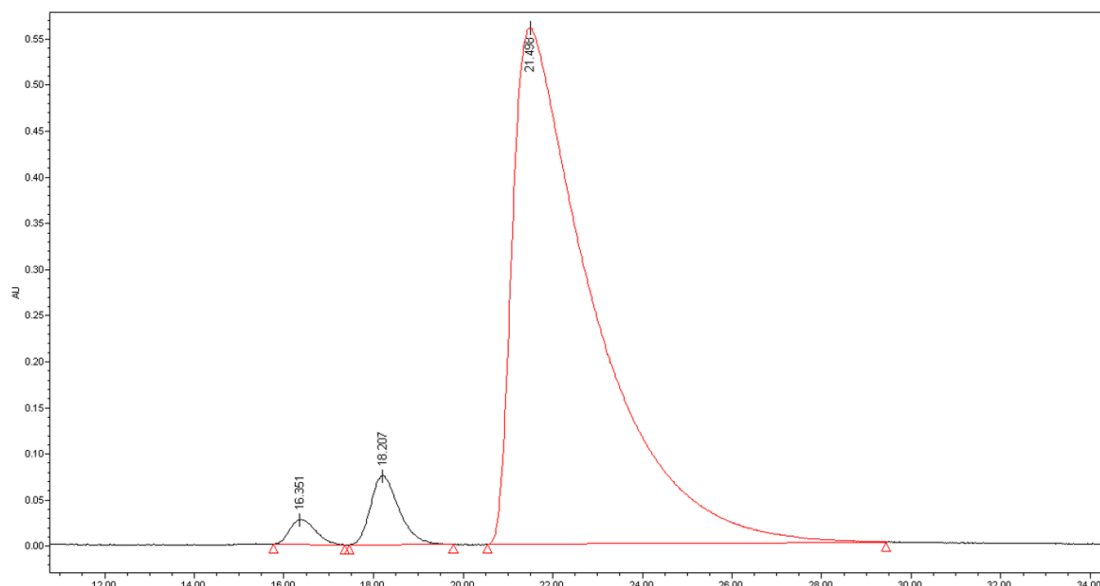

|   | Time/min | Area     | Height | Area% |
|---|----------|----------|--------|-------|
| 1 | 16.351   | 1063888  | 26697  | 1.43  |
| 2 | 18.207   | 3313899  | 75081  | 4.46  |
| 3 | 21.498   | 69967803 | 558905 | 94.11 |

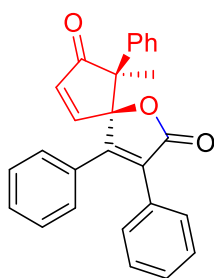

10

Major:

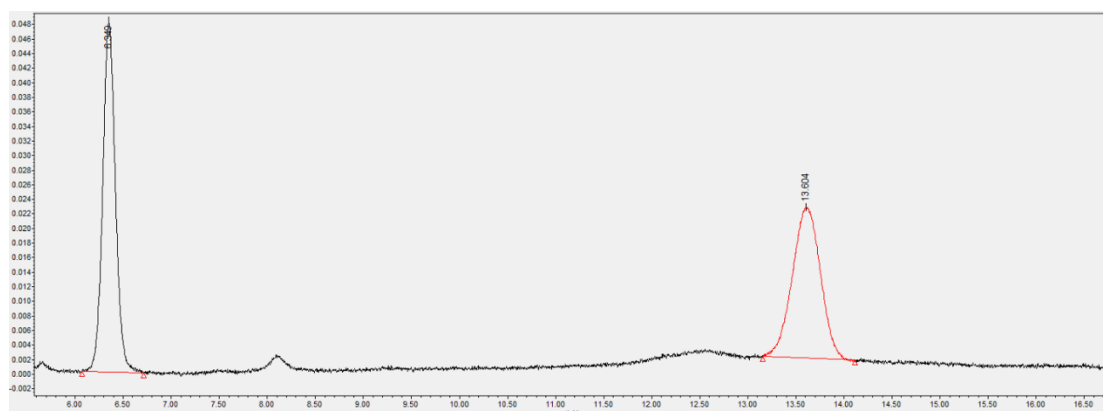

|   | Time/min | Area   | Height | Area% |
|---|----------|--------|--------|-------|
| 1 | 6.349    | 443040 | 48233  | 51.21 |
| 2 | 13.604   | 422110 | 20777  | 48.79 |

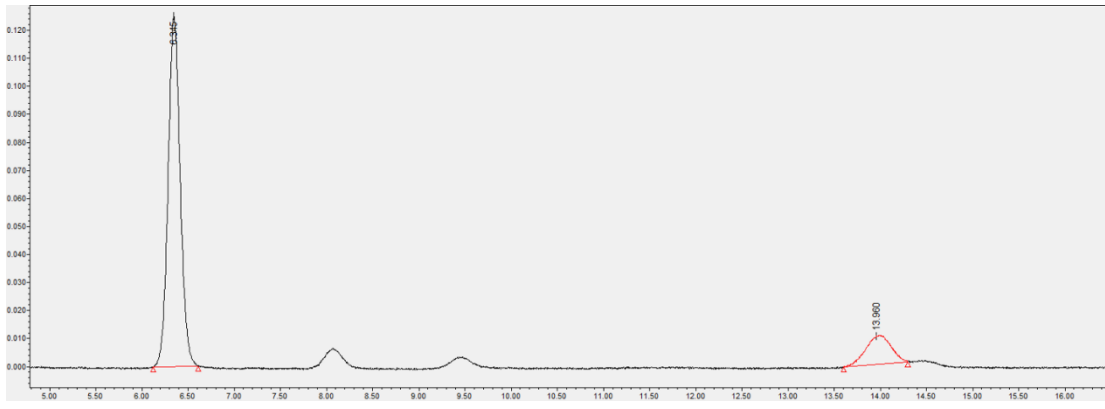

|   | Time/min | Area    | Height | Area% |
|---|----------|---------|--------|-------|
| 1 | 6.345    | 1139653 | 124925 | 85.19 |
| 2 | 13.960   | 198201  | 10278  | 14.81 |

Minor:

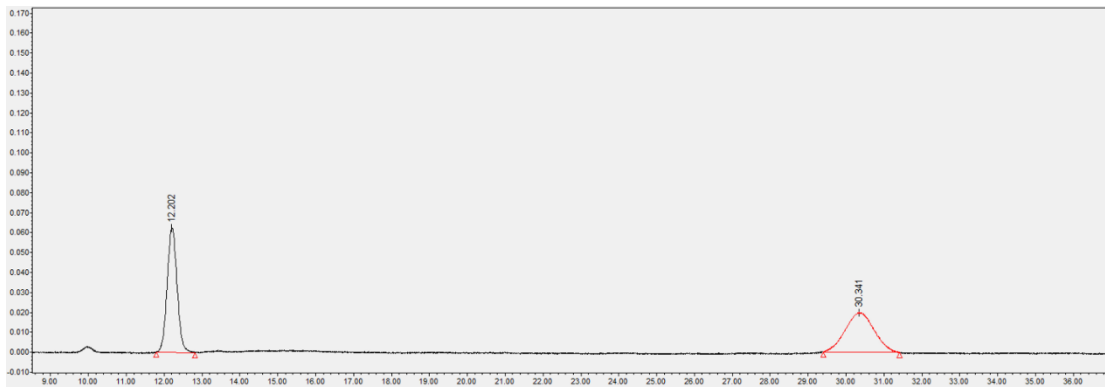

|   | Time/min | Area    | Height | Area% |
|---|----------|---------|--------|-------|
| 1 | 12.202   | 1134977 | 62520  | 51.96 |
| 2 | 30.341   | 1049354 | 20085  | 48.04 |

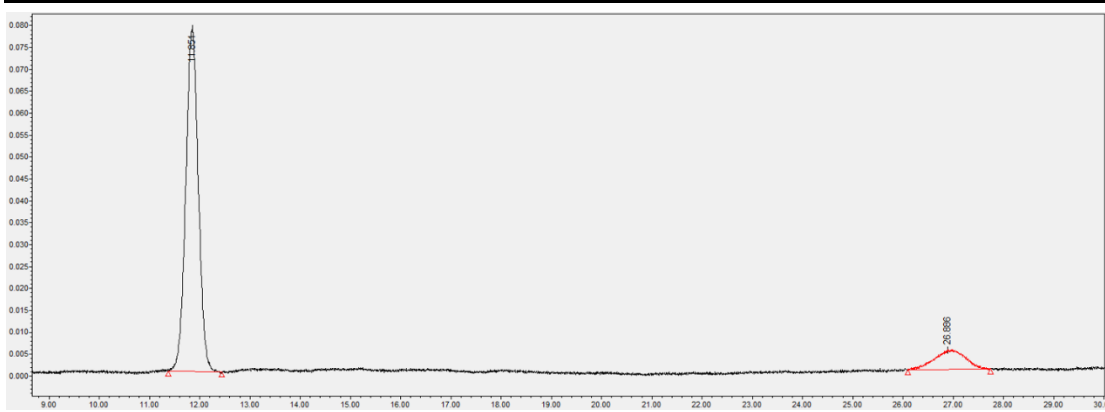

|   | Time/min | Area    | Height | Area% |
|---|----------|---------|--------|-------|
| 1 | 11.851   | 1362064 | 78159  | 87.99 |
| 2 | 26.886   | 185829  | 4475   | 12.01 |
